# Supplementary material for: A genome-wide functional genomics approach uncovers genetic determinants of immune phenotypes in type 1 diabetes
Source: eLife journal article supplement (doi:10.7554/elife.73709), 2022-05-24
Supplement: supp [file elife-73709-supp-v1.zip › elife_poa_e73709_Figure_1_figure_supplement_2.pdf]

[illegible]
