# Supplementary material for: A genome-wide functional genomics approach uncovers genetic determinants of immune phenotypes in type 1 diabetes
Source: eLife journal article supplement (doi:10.7554/elife.73709), 2022-05-24
Supplement: supp [file elife-73709-supp-v1.zip › elife_poa_e73709_Figure_1_figure_supplement_3.pdf]

Figure 1: Heatmap of cytokine and cell subpopulation expression across 100 samples. The heatmap is color-coded by cytokine expression (red for positive, blue for negative) and cell subpopulation expression (red for positive, blue for negative). The color scale ranges from -0.4 (blue) to 0.4 (red). The dendrogram at the top shows hierarchical clustering of samples. The dendrogram on the left shows hierarchical clustering of cell subpopulations. The color bar on the right indicates the cell subpopulation for each sample. The color bar at the bottom indicates the cell subpopulation for each sample. The color bar on the right indicates the cell subpopulation for each sample. The color bar at the bottom indicates the cell subpopulation for each sample.
