# Supplementary material for: A genome-wide functional genomics approach uncovers genetic determinants of immune phenotypes in type 1 diabetes
Source: eLife journal article supplement (doi:10.7554/elife.73709), 2022-05-24
Supplement: supp [file elife-73709-supp-v1.zip › elife_poa_e73709_Supplementary_file_1.xlsx]

## Sheet: S1
Supplementary file 1: Numbers and basic characteristics of participants included in the study.
	300DM	500FG
N	243	534
N (Genotype data after QC)	215	451
N (Cell counts data)	242	473
N (Cytokine data)	233	489
Male sex: N (%)	132 (54.3%)	238(44.6%)
Age : mean (SD)	51.7 (16.3)	28.5 (13.7)

## Sheet: S2
Supplementary file 2. Summary statistics of reported T1D GWAS SNPs in 300DM and 500FG
loci	CHR	SNP	BP	A1	F_A	F_U	A2	CHISQ	P	OR
1	1	rs2301055	64106817	C	0.1706	0.1696	T	0.001653	0.9676	1.007
	1	rs2301054	64107028	G	0.1706	0.1671	A	0.0238	0.8774	1.025
	1	rs2269247	64107284	T	0.1659	0.162	C	0.03078	0.8607	1.029
	1	rs2269246	64107491	C	0.1729	0.1658	T	0.09916	0.7528	1.052
	1	rs2269245	64107893	A	0.1729	0.1607	G	0.2982	0.585	1.092
	1	rs2269242	64108682	A	0.1729	0.1658	G	0.09916	0.7528	1.052
	1	rs2269241	64108771	C	0.1729	0.1658	T	0.09916	0.7528	1.052
	1	rs2269240	64109264	C	0.1776	0.1645	T	0.3344	0.5631	1.096
	1	rs2269239	64109359	G	0.1776	0.1645	C	0.3344	0.5631	1.096
	1	rs3790858	64111548	G	0.1776	0.1607	A	0.5664	0.4517	1.128
	1	rs3790857	64111866	T	0.1776	0.1607	C	0.5664	0.4517	1.128
	1	rs12122838	64112169	C	0.1776	0.1607	A	0.5664	0.4517	1.128
	1	rs61765292	64113459	G	0.1776	0.1607	A	0.5664	0.4517	1.128
	1	rs10889435	64113956	T	0.1776	0.1633	A	0.4047	0.5247	1.107
	1	rs11208257	64114301	C	0.1776	0.1607	T	0.5664	0.4517	1.128
	1	rs11576729	64114429	T	0.1776	0.1607	G	0.5664	0.4517	1.128
	1	rs1911109	64114660	C	0.1776	0.1633	T	0.4047	0.5247	1.107
	1	rs2269238	64117537	T	0.1776	0.1569	G	0.863	0.3529	1.16
	1	rs2360159	64118801	C	0.1776	0.1569	T	0.863	0.3529	1.16
	1	rs2269235	64118915	G	0.1776	0.1569	A	0.863	0.3529	1.16
	1	rs2269234	64118976	G	0.1776	0.1569	A	0.863	0.3529	1.16
	1	rs2269233	64119346	C	0.1776	0.162	T	0.482	0.4875	1.117
	1	rs12027168	64120613	C	0.1776	0.1594	T	0.6579	0.4173	1.138
	1	rs7541882	64121569	C	0.1776	0.1594	A	0.6579	0.4173	1.138
	1	rs7519583	64121684	A	0.1963	0.1722	G	1.083	0.298	1.174
	1	rs855355	64121877	G	0.1963	0.1722	A	1.083	0.298	1.174
2	1	rs41289033	85279394	A	0.0771	0.1071	T	2.865	0.09055	0.6962
	1	rs17377758	85287327	C	0.0771	0.1046	T	2.436	0.1186	0.7152
	1	rs17377765	85287844	C	0.07944	0.1046	T	2.024	0.1549	0.7388
	1	rs80240401	85290347	C	0.07944	0.1046	T	2.024	0.1549	0.7388
	1	rs17377800	85302164	G	0.09112	0.1186	A	2.158	0.1419	0.7449
	1	rs1983853	85311192	T	0.08879	0.1135	C	1.806	0.179	0.7609
3	1	rs6679677	114303808	A	0.1752	0.1122	C	9.437	0.002127	1.68
	1	rs2476601	114377568	A	0.1776	0.1122	G	10.1	0.001485	1.708
4	1	rs6427855	200726579	G	0.2009	0.2066	A	0.05523	0.8142	0.9655
	1	rs12043133	200741713	G	0.2009	0.2066	T	0.05523	0.8142	0.9655
	1	rs6658395	200748760	T	0.2056	0.2054	C	0.0001063	0.9918	1.002
	1	rs6427859	200780153	A	0.2056	0.2054	C	0.0001063	0.9918	1.002
	1	rs7528217	200788077	T	0.2056	0.2054	C	0.0001063	0.9918	1.002
	1	rs6690988	200798900	C	0.1893	0.1888	G	0.0004108	0.9838	1.003
	1	rs6659127	200803657	T	0.2056	0.2054	C	0.0001063	0.9918	1.002
	1	rs6691977	200814959	C	0.2056	0.2054	T	0.0001063	0.9918	1.002
	1	rs10920052	200820610	A	0.1893	0.1875	C	0.005566	0.9405	1.012
	1	rs7520696	200828267	T	0.2056	0.2054	A	0.0001063	0.9918	1.002
	1	rs7533782	200832584	G	0.1893	0.1888	A	0.0004108	0.9838	1.003
	1	rs7511678	200832857	A	0.2056	0.2054	G	0.0001063	0.9918	1.002
5	1	rs3024505	206939904	A	0.1238	0.1722	G	4.941	0.02623	0.6794
	1	rs3024495	206942413	T	0.1238	0.1722	C	4.941	0.02623	0.6794
	1	rs3024493	206943968	A	0.1238	0.1722	C	4.941	0.02623	0.6794
	1	rs3122605	206955041	G	0.1215	0.1582	A	2.999	0.08332	0.7361
6	2	rs6432305	12636811	G	0.4743	0.4401	A	1.311	0.2522	1.148
	2	rs1358426	12637437	A	0.4743	0.4426	G	1.122	0.2894	1.136
	2	rs1534422	12640741	G	0.4463	0.4273	A	0.4054	0.5243	1.08
	2	rs1534423	12640838	G	0.4463	0.4247	A	0.5223	0.4699	1.091
	2	rs1569120	12642746	G	0.4463	0.4235	A	0.5863	0.4439	1.097
	2	rs1534428	12643443	C	0.4463	0.426	T	0.462	0.4967	1.086
	2	rs1534429	12644323	G	0.4603	0.4324	A	0.8726	0.3502	1.119
	2	rs1569121	12645559	G	0.4626	0.4337	A	0.9395	0.3324	1.124
	2	rs881429	12648174	T	0.4533	0.4082	C	2.306	0.1288	1.202
7	2	rs2165738	24692809	C	0.25	0.2258	G	0.9063	0.3411	1.143
8	2	rs478222	25301755	T	0.4603	0.4528	A	0.06236	0.8028	1.031
	2	rs493090	25303772	A	0.4603	0.4528	G	0.06236	0.8028	1.031
	2	rs567359	25304574	G	0.4626	0.4541	A	0.08127	0.7756	1.035
	2	rs483428	25305136	T	0.4603	0.4528	C	0.06236	0.8028	1.031
	2	rs551573	25305504	A	0.4603	0.4541	G	0.04288	0.836	1.025
	2	rs1530016	25305756	T	0.4603	0.4528	C	0.06236	0.8028	1.031
	2	rs530951	25307005	T	0.4603	0.4528	C	0.06236	0.8028	1.031
	2	rs565906	25308576	C	0.4626	0.4528	T	0.1074	0.7431	1.04
	2	rs487617	25309756	G	0.4603	0.4515	C	0.08549	0.77	1.036
	2	rs512419	25310155	T	0.4603	0.4515	G	0.08549	0.77	1.036
	2	rs564667	25310860	T	0.4836	0.4821	A	0.002501	0.9601	1.006
	2	rs546217	25311537	C	0.4836	0.4821	A	0.002501	0.9601	1.006
	2	rs2918630	25314186	C	0.4836	0.4821	T	0.002501	0.9601	1.006
	2	rs492393	25315511	A	0.4603	0.4515	G	0.08549	0.77	1.036
	2	rs2917916	25316336	C	0.4836	0.4821	A	0.002501	0.9601	1.006
	2	rs522806	25316584	A	0.4603	0.4515	C	0.08549	0.77	1.036
	2	rs2438679	25317653	T	0.4836	0.4821	C	0.002501	0.9601	1.006
	2	rs475868	25318059	G	0.4836	0.4821	A	0.002501	0.9601	1.006
	2	rs480319	25318522	A	0.4603	0.4528	G	0.06236	0.8028	1.031
	2	rs563590	25331172	G	0.4813	0.4821	A	0.0007721	0.9778	0.9967
	2	rs488817	25332696	T	0.4579	0.4515	C	0.04594	0.8303	1.026
	2	rs519111	25333735	C	0.4603	0.4528	T	0.06236	0.8028	1.031
	2	rs839652	25334340	T	0.4603	0.4528	C	0.06236	0.8028	1.031
	2	rs497567	25335089	A	0.4603	0.4528	G	0.06236	0.8028	1.031
	2	rs11684464	25340610	G	0.4626	0.4541	A	0.08127	0.7756	1.035
9	2	rs6547853	28646801	A	0.3645	0.3686	G	0.02039	0.8865	0.9823
10	2	rs2164712	100745404	G	0.3224	0.3495	C	0.9035	0.3418	0.8857
	2	rs2118280	100746395	A	0.3224	0.3533	G	1.173	0.2788	0.871
	2	rs11681227	100754997	G	0.3201	0.3457	A	0.8106	0.3679	0.8912
	2	rs13032454	100756009	C	0.3201	0.3457	T	0.8106	0.3679	0.8912
	2	rs12712064	100756548	T	0.3201	0.3457	C	0.8106	0.3679	0.8912
	2	rs4851252	100757280	T	0.3201	0.3457	C	0.8106	0.3679	0.8912
	2	rs11123809	100758137	T	0.3318	0.3635	C	1.223	0.2688	0.8693
	2	rs11900482	100758709	C	0.3201	0.3469	G	0.8924	0.3448	0.8862
	2	rs13003982	100759078	C	0.3201	0.3469	T	0.8924	0.3448	0.8862
	2	rs11123810	100759285	C	0.3201	0.3469	T	0.8924	0.3448	0.8862
	2	rs11681966	100759457	A	0.3201	0.3469	C	0.8924	0.3448	0.8862
	2	rs11692867	100759477	A	0.3201	0.3469	G	0.8924	0.3448	0.8862
	2	rs12987209	100761148	T	0.3201	0.3469	C	0.8924	0.3448	0.8862
	2	rs12987212	100761156	T	0.3201	0.3469	C	0.8924	0.3448	0.8862
	2	rs11690905	100761473	G	0.3201	0.3469	A	0.8924	0.3448	0.8862
	2	rs11123812	100761548	C	0.3201	0.3469	T	0.8924	0.3448	0.8862
	2	rs4850921	100762699	T	0.3201	0.3469	G	0.8924	0.3448	0.8862
	2	rs4851253	100762786	G	0.3318	0.3622	T	1.128	0.2883	0.8741
	2	rs12712067	100763900	T	0.3201	0.3469	G	0.8924	0.3448	0.8862
	2	rs13415465	100764004	G	0.3201	0.3469	T	0.8924	0.3448	0.8862
	2	rs13415583	100764087	G	0.3201	0.3469	T	0.8924	0.3448	0.8862
	2	rs10496344	100764125	C	0.3201	0.3469	T	0.8924	0.3448	0.8862
	2	rs12712068	100764439	G	0.3201	0.3469	A	0.8924	0.3448	0.8862
	2	rs1821826	100764711	T	0.3248	0.3482	C	0.6784	0.4101	0.9003
	2	rs1821827	100764717	C	0.3248	0.3482	T	0.6784	0.4101	0.9003
	2	rs1370353	100764824	C	0.3248	0.3482	G	0.6784	0.4101	0.9003
	2	rs2009094	100765077	A	0.3248	0.3482	G	0.6784	0.4101	0.9003
	2	rs2009095	100765081	T	0.3248	0.3482	C	0.6784	0.4101	0.9003
	2	rs11123813	100765692	T	0.3248	0.3482	C	0.6784	0.4101	0.9003
	2	rs11899489	100766253	C	0.3248	0.3482	A	0.6784	0.4101	0.9003
	2	rs4490209	100766711	G	0.3248	0.3482	C	0.6784	0.4101	0.9003
	2	rs11123814	100767082	G	0.3248	0.3482	A	0.6784	0.4101	0.9003
	2	rs6707067	100767232	A	0.3364	0.3648	G	0.9719	0.3242	0.8829
	2	rs12992234	100767886	A	0.3364	0.3648	G	0.9719	0.3242	0.8829
	2	rs36026386	100771741	C	0.3248	0.3482	T	0.6784	0.4101	0.9003
	2	rs4499444	100773609	G	0.3248	0.3482	C	0.6784	0.4101	0.9003
	2	rs7565895	100774773	A	0.3248	0.3482	G	0.6784	0.4101	0.9003
	2	rs4851256	100775045	C	0.3364	0.3648	T	0.9719	0.3242	0.8829
	2	rs4851257	100775297	T	0.3248	0.3482	C	0.6784	0.4101	0.9003
	2	rs2164711	100775422	T	0.3248	0.3482	G	0.6784	0.4101	0.9003
	2	rs10168615	100776594	G	0.3364	0.3648	A	0.9719	0.3242	0.8829
	2	rs2309755	100779749	A	0.3364	0.3648	G	0.9719	0.3242	0.8829
	2	rs2309756	100780269	C	0.3248	0.3482	G	0.6784	0.4101	0.9003
	2	rs4851258	100780830	C	0.3271	0.3482	T	0.5493	0.4586	0.9099
	2	rs4851259	100781011	C	0.3248	0.3482	A	0.6784	0.4101	0.9003
	2	rs4851260	100781132	G	0.3364	0.3648	C	0.9719	0.3242	0.8829
	2	rs12712070	100781239	A	0.3248	0.3482	C	0.6784	0.4101	0.9003
	2	rs6729966	100781566	G	0.3364	0.3648	A	0.9719	0.3242	0.8829
	2	rs4850923	100782256	C	0.3248	0.3482	A	0.6784	0.4101	0.9003
	2	rs4850924	100782273	G	0.3364	0.3648	A	0.9719	0.3242	0.8829
	2	rs10176782	100782827	A	0.3248	0.3482	C	0.6784	0.4101	0.9003
	2	rs13013594	100784190	G	0.3248	0.3482	A	0.6784	0.4101	0.9003
	2	rs4851261	100786717	G	0.3248	0.3482	A	0.6784	0.4101	0.9003
	2	rs11687586	100789346	G	0.3364	0.3648	A	0.9719	0.3242	0.8829
	2	rs7601892	100789490	A	0.3364	0.3648	G	0.9719	0.3242	0.8829
	2	rs7590378	100789877	G	0.3294	0.3635	A	1.411	0.2349	0.8602
	2	rs7593261	100789907	C	0.3294	0.3635	T	1.411	0.2349	0.8602
	2	rs10185059	100790172	T	0.3178	0.3469	C	1.056	0.3042	0.8767
	2	rs10185510	100790581	T	0.3178	0.3469	C	1.056	0.3042	0.8767
	2	rs10197987	100790783	T	0.3294	0.3635	A	1.411	0.2349	0.8602
	2	rs12712071	100793876	A	0.3178	0.3469	G	1.056	0.3042	0.8767
	2	rs11891046	100794402	G	0.3294	0.3635	C	1.411	0.2349	0.8602
	2	rs56054309	100794940	C	0.3294	0.3635	T	1.411	0.2349	0.8602
	2	rs11902705	100795207	A	0.3294	0.3635	G	1.411	0.2349	0.8602
	2	rs12712073	100805128	C	0.3528	0.3635	T	0.138	0.7102	0.9544
11	2	rs1969233	111597700	C	0.3107	0.3151	T	0.02382	0.8773	0.9802
	2	rs1533295	111597991	G	0.3107	0.3151	A	0.02382	0.8773	0.9802
	2	rs999643	111598365	T	0.3107	0.3151	C	0.02382	0.8773	0.9802
	2	rs999642	111598366	G	0.3107	0.3151	A	0.02382	0.8773	0.9802
	2	rs10180446	111601942	C	0.3061	0.3099	G	0.01948	0.889	0.982
	2	rs12476878	111602974	G	0.3061	0.3099	A	0.01948	0.889	0.982
	2	rs13019266	111604642	T	0.3061	0.3099	C	0.01948	0.889	0.982
	2	rs9917154	111606591	G	0.3061	0.3099	C	0.01948	0.889	0.982
	2	rs7576541	111607401	C	0.3061	0.3099	T	0.01948	0.889	0.982
	2	rs7588925	111608534	T	0.2827	0.2806	C	0.006027	0.9381	1.01
	2	rs10179923	111609690	G	0.2827	0.2806	A	0.006027	0.9381	1.01
	2	rs10180020	111609758	G	0.2827	0.2806	A	0.006027	0.9381	1.01
	2	rs12711785	111613736	A	0.2827	0.2806	G	0.006027	0.9381	1.01
	2	rs4849134	111615015	A	0.278	0.2806	G	0.009111	0.924	0.9873
	2	rs4849135	111615079	T	0.278	0.2806	G	0.009111	0.924	0.9873
	2	rs1533300	111615925	T	0.278	0.2806	C	0.009111	0.924	0.9873
	2	rs1533298	111616304	C	0.278	0.2793	T	0.002324	0.9615	0.9936
	2	rs2612698	111622435	T	0.2874	0.2934	C	0.04803	0.8265	0.9714
	2	rs2341873	111626734	T	0.2921	0.2972	C	0.03511	0.8514	0.9756
	2	rs2612700	111632332	A	0.2874	0.2934	G	0.04803	0.8265	0.9714
	2	rs4849155	111635197	G	0.2921	0.2959	A	0.01988	0.8879	0.9816
	2	rs4848317	111639439	A	0.2921	0.2959	T	0.01988	0.8879	0.9816
	2	rs10864930	111667660	A	0.2921	0.2985	G	0.05462	0.8152	0.9696
12	2	rs2111485	163110536	A	0.3154	0.3597	G	2.405	0.121	0.8202
	2	rs1990760	163124051	C	0.3178	0.361	T	2.286	0.1306	0.8245
13	2	rs6745050	204691538	T	0.4206	0.4286	C	0.07267	0.7875	0.9677
	2	rs34636506	204692216	G	0.4182	0.4337	A	0.2699	0.6034	0.9388
	2	rs1968351	204693736	C	0.4182	0.4311	A	0.1883	0.6643	0.9486
	2	rs13030124	204694263	A	0.4182	0.4311	G	0.1883	0.6643	0.9486
	2	rs34050244	204696941	A	0.4182	0.4286	G	0.1213	0.7276	0.9585
	2	rs34461055	204697133	G	0.4182	0.4286	A	0.1213	0.7276	0.9585
	2	rs12990970	204700689	T	0.4159	0.4286	C	0.1824	0.6694	0.9493
	2	rs1863800	204702660	T	0.4159	0.4286	C	0.1824	0.6694	0.9493
	2	rs13033315	204706865	T	0.4182	0.4298	A	0.153	0.6957	0.9535
	2	rs231804	204708646	C	0.4182	0.4324	T	0.2273	0.6336	0.9437
	2	rs11571304	204708776	A	0.4182	0.4324	T	0.2273	0.6336	0.9437
	2	rs231806	204709349	C	0.4182	0.4324	G	0.2273	0.6336	0.9437
	2	rs231811	204713891	G	0.4182	0.4324	T	0.2273	0.6336	0.9437
	2	rs11571293	204717713	T	0.4112	0.4158	G	0.02416	0.8765	0.9812
	2	rs11571291	204721132	C	0.4182	0.4247	T	0.04825	0.8261	0.9736
	2	rs1024162	204722159	T	0.4182	0.4247	A	0.04825	0.8261	0.9736
	2	rs11571316	204731089	A	0.4182	0.4247	G	0.04825	0.8261	0.9736
	2	rs3087243	204738919	A	0.4439	0.4668	G	0.5853	0.4442	0.9117
	2	rs11571302	204742934	T	0.4509	0.4847	G	1.266	0.2605	0.8731
	2	rs7565213	204743409	A	0.4509	0.4847	G	1.266	0.2605	0.8731
	2	rs11571297	204745003	C	0.4579	0.4987	T	1.844	0.1745	0.8491
	2	rs960792	204749250	C	0.4696	0.5128	T	2.06	0.1512	0.8414
	2	rs7600322	204754353	C	0.4696	0.5128	T	2.06	0.1512	0.8414
	2	rs6748358	204756905	A	0.4696	0.5128	C	2.06	0.1512	0.8414
	2	rs1427678	204758358	A	0.4696	0.5128	G	2.06	0.1512	0.8414
	2	rs13010492	204776176	C	0.4696	0.5064	G	1.496	0.2213	0.8632
	2	rs17268364	204777818	A	0.4696	0.5064	G	1.496	0.2213	0.8632
14	3	rs73833032	46276490	C	0.09813	0.1288	T	2.507	0.1134	0.7358
	3	rs73833033	46277002	C	0.09813	0.1288	A	2.507	0.1134	0.7358
	3	rs79815064	46277577	G	0.07944	0.111	A	3.063	0.08011	0.6913
	3	rs74433128	46279933	G	0.09813	0.1288	T	2.507	0.1134	0.7358
	3	rs76733709	46281461	A	0.09813	0.1288	G	2.507	0.1134	0.7358
	3	rs113676185	46286046	T	0.09813	0.1288	C	2.507	0.1134	0.7358
	3	rs60020651	46287651	C	0.1005	0.1288	A	2.127	0.1447	0.7553
	3	rs113485180	46293070	C	0.1005	0.1288	T	2.127	0.1447	0.7553
	3	rs75994669	46300863	G	0.1005	0.1288	T	2.127	0.1447	0.7553
	3	rs79539493	46302938	A	0.1005	0.1288	G	2.127	0.1447	0.7553
	3	rs111890592	46317354	T	0.1005	0.1288	C	2.127	0.1447	0.7553
	3	rs78372062	46323679	A	0.1005	0.1288	G	2.127	0.1447	0.7553
	3	rs78729754	46339185	A	0.1005	0.1327	C	2.691	0.1009	0.7303
	3	rs80054040	46340285	A	0.1005	0.1327	C	2.691	0.1009	0.7303
	3	rs79629761	46340630	T	0.1005	0.1327	C	2.691	0.1009	0.7303
	3	rs75352297	46345151	C	0.1005	0.1327	T	2.691	0.1009	0.7303
	3	rs57093591	46350716	C	0.1005	0.1339	T	2.892	0.08904	0.7223
	3	rs113507038	46357822	T	0.1005	0.1339	C	2.892	0.08904	0.7223
	3	rs112384491	46360359	G	0.1005	0.1339	T	2.892	0.08904	0.7223
	3	rs113647051	46366857	C	0.1005	0.1339	T	2.892	0.08904	0.7223
	3	rs112088397	46389462	T	0.1005	0.1352	G	3.098	0.07837	0.7144
	3	rs3092960	46400062	A	0.1005	0.1352	G	3.098	0.07837	0.7144
	3	rs762790	46402688	G	0.1005	0.1352	C	3.098	0.07837	0.7144
	3	rs3136535	46409113	A	0.1005	0.1352	G	3.098	0.07837	0.7144
	3	rs41490645	46410137	C	0.1005	0.1352	A	3.098	0.07837	0.7144
	3	rs2856758	46411661	G	0.1028	0.148	A	4.927	0.02645	0.6598
	3	rs11575821	46422355	A	0.1028	0.1492	G	5.181	0.02283	0.6532
	3	rs7652037	46423063	C	0.1028	0.1492	A	5.181	0.02283	0.6532
	3	rs34291293	46425647	A	0.1028	0.1492	G	5.181	0.02283	0.6532
	3	rs34445878	46425711	T	0.1028	0.1492	A	5.181	0.02283	0.6532
	3	rs113263161	46425718	A	0.1028	0.148	G	4.927	0.02645	0.6598
	3	rs34971514	46427354	T	0.1028	0.1505	C	5.441	0.01966	0.6467
	3	rs111669359	46427616	C	0.1028	0.1492	A	5.181	0.02283	0.6532
	3	rs6787972	46427835	A	0.1028	0.148	G	4.927	0.02645	0.6598
	3	rs112359020	46429391	G	0.1028	0.1505	A	5.441	0.01966	0.6467
	3	rs35388950	46429679	T	0.1028	0.1505	G	5.441	0.01966	0.6467
	3	rs75630441	46429717	A	0.1028	0.1505	T	5.441	0.01966	0.6467
	3	rs113634435	46431695	G	0.1028	0.1505	A	5.441	0.01966	0.6467
	3	rs111713092	46431751	T	0.1028	0.1492	C	5.181	0.02283	0.6532
	3	rs113934302	46432856	A	0.1028	0.1505	C	5.441	0.01966	0.6467
	3	rs111961837	46433146	T	0.1028	0.1492	C	5.181	0.02283	0.6532
	3	rs112982903	46433247	G	0.1028	0.1492	A	5.181	0.02283	0.6532
	3	rs112368251	46433967	A	0.1028	0.1492	G	5.181	0.02283	0.6532
	3	rs113229741	46433987	C	0.1028	0.1492	T	5.181	0.02283	0.6532
	3	rs113255842	46435161	A	0.1028	0.1492	G	5.181	0.02283	0.6532
	3	rs6798291	46443931	C	0.1028	0.148	T	4.927	0.02645	0.6598
	3	rs916093	46444794	C	0.1028	0.148	T	4.927	0.02645	0.6598
	3	rs916094	46444835	C	0.1028	0.148	A	4.927	0.02645	0.6598
	3	rs112903945	46445343	C	0.1028	0.148	A	4.927	0.02645	0.6598
	3	rs11574428	46446721	A	0.1028	0.148	T	4.927	0.02645	0.6598
	3	rs11574429	46446810	C	0.1028	0.148	T	4.927	0.02645	0.6598
	3	rs11574434	46447915	A	0.1028	0.148	G	4.927	0.02645	0.6598
	3	rs11574435	46447972	T	0.08178	0.1186	C	3.979	0.04606	0.6617
	3	rs6808835	46449864	T	0.1028	0.148	G	4.927	0.02645	0.6598
	3	rs6441977	46450072	A	0.1028	0.148	G	4.927	0.02645	0.6598
	3	rs1140865	46450884	T	0.1028	0.148	A	4.927	0.02645	0.6598
	3	rs2157061	46451502	A	0.1028	0.148	G	4.927	0.02645	0.6598
	3	rs2157062	46451647	T	0.1028	0.148	C	4.927	0.02645	0.6598
	3	rs6762266	46452863	C	0.1028	0.148	T	4.927	0.02645	0.6598
	3	rs6770674	46452873	A	0.1028	0.148	G	4.927	0.02645	0.6598
	3	rs112384806	46453487	T	0.1028	0.148	C	4.927	0.02645	0.6598
	3	rs113774564	46454682	A	0.1028	0.148	G	4.927	0.02645	0.6598
	3	rs113069082	46454688	A	0.1028	0.148	G	4.927	0.02645	0.6598
	3	rs111514151	46455754	C	0.1028	0.148	T	4.927	0.02645	0.6598
	3	rs113942981	46457329	T	0.1028	0.148	C	4.927	0.02645	0.6598
	3	rs113490452	46458228	A	0.1028	0.148	C	4.927	0.02645	0.6598
	3	rs6782522	46458505	A	0.1028	0.148	T	4.927	0.02645	0.6598
	3	rs6791599	46458942	A	0.1028	0.148	G	4.927	0.02645	0.6598
	3	rs111959715	46459050	C	0.1028	0.148	A	4.927	0.02645	0.6598
	3	rs6791789	46459121	A	0.1028	0.148	G	4.927	0.02645	0.6598
	3	rs113365357	46459291	A	0.1028	0.148	G	4.927	0.02645	0.6598
	3	rs112870257	46459398	A	0.1028	0.148	G	4.927	0.02645	0.6598
	3	rs113888916	46459411	T	0.1028	0.148	C	4.927	0.02645	0.6598
	3	rs113710186	46459914	C	0.1028	0.148	T	4.927	0.02645	0.6598
	3	rs111958022	46459956	G	0.1028	0.148	A	4.927	0.02645	0.6598
	3	rs113064717	46460013	C	0.1028	0.148	T	4.927	0.02645	0.6598
	3	rs111410234	46460675	T	0.1028	0.148	C	4.927	0.02645	0.6598
	3	rs112712359	46461783	A	0.1028	0.148	G	4.927	0.02645	0.6598
15	4	rs34185821	26085480	G	0.3294	0.2819	A	2.989	0.08385	1.252
	4	rs10517086	26085511	A	0.3294	0.2819	G	2.989	0.08385	1.252
	4	rs17630466	26086569	G	0.3294	0.2819	A	2.989	0.08385	1.252
	4	rs16878091	26088128	A	0.3294	0.2819	G	2.989	0.08385	1.252
	4	rs7441808	26090375	G	0.3294	0.2806	A	3.156	0.07565	1.259
	4	rs932036	26090862	T	0.3294	0.2819	A	2.989	0.08385	1.252
	4	rs4473645	26091198	G	0.3294	0.2819	A	2.989	0.08385	1.252
	4	rs35944082	26095314	G	0.3294	0.2819	A	2.989	0.08385	1.252
	4	rs6448432	26098810	A	0.3294	0.2857	G	2.515	0.1128	1.228
	4	rs12506688	26104113	T	0.3294	0.2819	C	2.989	0.08385	1.252
	4	rs874040	26108197	C	0.3294	0.2819	G	2.989	0.08385	1.252
	4	rs6448434	26110113	A	0.3318	0.2934	G	1.92	0.1659	1.196
	4	rs34046593	26111593	A	0.3318	0.2934	G	1.92	0.1659	1.196
	4	rs6848239	26114046	G	0.3271	0.2844	A	2.402	0.1212	1.223
	4	rs34897565	26115747	C	0.3271	0.2844	T	2.402	0.1212	1.223
	4	rs11933540	26120001	C	0.3271	0.2857	T	2.257	0.133	1.215
	4	rs36020664	26120328	G	0.3271	0.2857	T	2.257	0.133	1.215
	4	rs36110812	26120478	G	0.3271	0.2844	A	2.402	0.1212	1.223
	4	rs6825116	26122858	T	0.3271	0.2844	G	2.402	0.1212	1.223
	4	rs7668577	26123319	C	0.3271	0.2844	A	2.402	0.1212	1.223
	4	rs79004320	26125938	A	0.3271	0.2844	T	2.402	0.1212	1.223
	4	rs7673206	26126838	G	0.3271	0.2844	A	2.402	0.1212	1.223
	4	rs35844597	26128148	C	0.3271	0.2844	G	2.402	0.1212	1.223
	4	rs35858516	26128710	A	0.3248	0.2844	G	2.15	0.1426	1.21
16	4	rs56035021	123067808	A	0.3762	0.3559	G	0.4934	0.4824	1.091
	4	rs62323898	123076895	G	0.3762	0.3546	A	0.5579	0.4551	1.098
	4	rs55969942	123116862	G	0.3762	0.3546	T	0.5579	0.4551	1.098
	4	rs55904957	123116995	C	0.3762	0.3546	T	0.5579	0.4551	1.098
	4	rs7671357	123126450	A	0.3762	0.3546	C	0.5579	0.4551	1.098
	4	rs4505848	123132492	G	0.3762	0.3546	A	0.5579	0.4551	1.098
	4	rs7664452	123146225	G	0.3762	0.3546	T	0.5579	0.4551	1.098
	4	rs6827756	123184411	T	0.3972	0.3852	C	0.1674	0.6824	1.052
	4	rs72687044	123188501	G	0.3762	0.3533	A	0.6265	0.4287	1.104
	4	rs13147049	123193870	A	0.3785	0.3546	G	0.6846	0.408	1.109
	4	rs6534347	123198435	A	0.3972	0.3852	G	0.1674	0.6824	1.052
	4	rs28854492	123215381	T	0.3762	0.3533	C	0.6265	0.4287	1.104
	4	rs7699742	123264485	C	0.3785	0.3584	T	0.4817	0.4877	1.09
	4	rs11722421	123271668	C	0.3785	0.3584	G	0.4817	0.4877	1.09
	4	rs11727369	123286227	A	0.3972	0.3839	G	0.2051	0.6506	1.057
	4	rs4145717	123316076	T	0.3785	0.3559	G	0.6129	0.4337	1.102
	4	rs12499753	123333177	C	0.3785	0.3559	T	0.6129	0.4337	1.102
	4	rs1904522	123336918	A	0.3785	0.3559	G	0.6129	0.4337	1.102
	4	rs55896948	123342114	G	0.3785	0.3559	T	0.6129	0.4337	1.102
	4	rs716501	123351925	A	0.3785	0.3559	G	0.6129	0.4337	1.102
	4	rs56360035	123363029	T	0.3785	0.3559	A	0.6129	0.4337	1.102
	4	rs56267605	123363109	C	0.3785	0.3559	A	0.6129	0.4337	1.102
	4	rs3136534	123369776	G	0.3785	0.3559	T	0.6129	0.4337	1.102
	4	rs2069763	123377482	A	0.3785	0.3559	C	0.6129	0.4337	1.102
	4	rs45599938	123386720	A	0.3785	0.3584	G	0.4817	0.4877	1.09
	4	rs11098659	123396028	C	0.3785	0.3559	T	0.6129	0.4337	1.102
	4	rs148505069	123417564	G	0.3879	0.3584	A	1.03	0.3101	1.134
	4	rs4438772	123420095	A	0.3879	0.3559	G	1.219	0.2696	1.147
	4	rs11725823	123425785	C	0.3879	0.3559	G	1.219	0.2696	1.147
	4	rs72669154	123431998	T	0.3972	0.3559	C	2.028	0.1545	1.193
	4	rs4380538	123448562	T	0.3879	0.3559	C	1.219	0.2696	1.147
	4	rs62322747	123456457	G	0.3879	0.3584	A	1.03	0.3101	1.134
17	4	rs1246906	166558981	C	0.1986	0.1875	G	0.2203	0.6388	1.074
	4	rs1246904	166560583	A	0.1986	0.1875	T	0.2203	0.6388	1.074
	4	rs6536925	166561920	C	0.1986	0.1875	A	0.2203	0.6388	1.074
	4	rs2253129	166564089	A	0.1986	0.1875	G	0.2203	0.6388	1.074
	4	rs2322266	166564417	C	0.1986	0.1875	T	0.2203	0.6388	1.074
	4	rs4511957	166565409	G	0.1986	0.1875	A	0.2203	0.6388	1.074
	4	rs2714828	166565849	G	0.1986	0.1875	C	0.2203	0.6388	1.074
	4	rs2714829	166567707	A	0.1986	0.1875	G	0.2203	0.6388	1.074
	4	rs2714833	166567947	G	0.1986	0.1875	A	0.2203	0.6388	1.074
	4	rs2714834	166568732	A	0.1986	0.1875	C	0.2203	0.6388	1.074
	4	rs2611221	166569387	A	0.1986	0.1875	C	0.2203	0.6388	1.074
	4	rs2611219	166570869	T	0.1986	0.1875	C	0.2203	0.6388	1.074
	4	rs2611216	166572484	C	0.1986	0.1875	T	0.2203	0.6388	1.074
	4	rs2714837	166572648	G	0.1986	0.1875	T	0.2203	0.6388	1.074
	4	rs2611215	166574267	A	0.2009	0.1875	G	0.3218	0.5705	1.09
	4	rs2714839	166574759	C	0.2009	0.1875	T	0.3218	0.5705	1.09
	4	rs2611211	166575439	C	0.2009	0.1875	T	0.3218	0.5705	1.09
18	5	rs903388	35827646	C	0.4159	0.4056	G	0.1209	0.728	1.043
	5	rs903389	35827665	C	0.4159	0.4056	G	0.1209	0.728	1.043
	5	rs11950647	35830357	C	0.3879	0.3903	T	0.007021	0.9332	0.9897
	5	rs6451229	35866218	G	0.4346	0.4082	A	0.7944	0.3728	1.114
	5	rs11957503	35883176	G	0.4346	0.4069	T	0.8735	0.35	1.12
	5	rs11954020	35883251	G	0.4346	0.4069	C	0.8735	0.35	1.12
	5	rs2194226	35883757	A	0.4346	0.4069	C	0.8735	0.35	1.12
	5	rs2194225	35883804	C	0.4346	0.4069	T	0.8735	0.35	1.12
19	5	rs17166496	132628884	G	0.4206	0.389	C	1.147	0.2842	1.14
20	6	rs9272346	32604372	G	0.2196	0.4579	A	67.16	2.505e-16	0.3332
	6	rs1063355	32627714	T	0.2196	0.4541	G	65.2	6.783e-16	0.3384
	6	rs3828790	32635809	T	0.2593	0.4592	C	46.53	9e-12	0.4124
	6	rs9274660	32636434	A	0.2196	0.4528	G	64.55	9.427e-16	0.3401
21	6	rs10944479	90880393	A	0.2173	0.176	G	3.057	0.08041	1.3
	6	rs72928038	90976768	A	0.1963	0.1696	G	1.335	0.248	1.195
	6	rs6908626	91005743	T	0.1963	0.1735	G	0.9681	0.3252	1.163
22	6	rs6919397	126659043	G	0.4556	0.4273	T	0.9018	0.3423	1.122
	6	rs9388486	126661154	C	0.4556	0.4286	T	0.8221	0.3646	1.116
	6	rs9375435	126661858	T	0.4556	0.4286	C	0.8221	0.3646	1.116
	6	rs17754780	126664333	T	0.4556	0.4298	C	0.746	0.3877	1.11
	6	rs6907898	126666416	T	0.4556	0.4298	C	0.746	0.3877	1.11
	6	rs9401876	126669479	A	0.4579	0.4311	C	0.8081	0.3687	1.115
	6	rs2045258	126674354	G	0.4579	0.4311	A	0.8081	0.3687	1.115
	6	rs9491624	126679106	T	0.4579	0.4311	A	0.8081	0.3687	1.115
	6	rs2326387	126680489	A	0.4603	0.4311	G	0.9546	0.3285	1.125
	6	rs9398803	126683594	G	0.4766	0.4477	A	0.9336	0.3339	1.123
	6	rs2027299	126685827	C	0.4603	0.4311	G	0.9546	0.3285	1.125
	6	rs4895807	126686513	G	0.4579	0.4311	C	0.8081	0.3687	1.115
	6	rs9388489	126698719	G	0.4579	0.4311	A	0.8081	0.3687	1.115
	6	rs1361262	126701967	C	0.4579	0.4311	T	0.8081	0.3687	1.115
	6	rs9398804	126703390	A	0.4393	0.4222	T	0.329	0.5662	1.072
	6	rs9388490	126704795	T	0.4463	0.4222	C	0.6541	0.4187	1.103
	6	rs1578060	126712247	C	0.4673	0.4337	G	1.266	0.2604	1.146
	6	rs1591805	126717064	G	0.5023	0.4694	A	1.204	0.2725	1.141
	6	rs9398805	126726295	T	0.4673	0.4337	C	1.266	0.2604	1.146
	6	rs4897179	126727930	A	0.4673	0.4337	G	1.266	0.2604	1.146
	6	rs4897180	126727950	T	0.4673	0.4337	A	1.266	0.2604	1.146
	6	rs9321065	126744087	A	0.465	0.4324	G	1.189	0.2756	1.141
	6	rs2039735	126745076	C	0.465	0.4324	T	1.189	0.2756	1.141
	6	rs1538172	126748493	G	0.465	0.4324	A	1.189	0.2756	1.141
	6	rs9401881	126751921	T	0.465	0.4324	C	1.189	0.2756	1.141
	6	rs4565329	126752798	T	0.465	0.4324	C	1.189	0.2756	1.141
	6	rs1538170	126752874	T	0.465	0.4324	C	1.189	0.2756	1.141
	6	rs1538171	126752884	G	0.465	0.4324	C	1.189	0.2756	1.141
	6	rs4897181	126753564	T	0.465	0.4324	C	1.189	0.2756	1.141
	6	rs9401882	126755055	G	0.465	0.4324	A	1.189	0.2756	1.141
	6	rs4897182	126755642	G	0.465	0.4324	T	1.189	0.2756	1.141
	6	rs9375439	126758540	G	0.465	0.4324	C	1.189	0.2756	1.141
	6	rs9398808	126758791	T	0.465	0.4324	G	1.189	0.2756	1.141
	6	rs9385399	126759033	T	0.465	0.4324	G	1.189	0.2756	1.141
	6	rs1415671	126759587	G	0.465	0.4324	T	1.189	0.2756	1.141
	6	rs2184968	126760994	C	0.4673	0.4324	T	1.365	0.2427	1.151
	6	rs2152876	126761228	A	0.465	0.4324	G	1.189	0.2756	1.141
	6	rs9385400	126764190	G	0.465	0.4324	T	1.189	0.2756	1.141
	6	rs1361107	126767511	C	0.465	0.4324	A	1.189	0.2756	1.141
	6	rs1361108	126767600	T	0.465	0.4324	C	1.189	0.2756	1.141
	6	rs1337735	126771024	A	0.465	0.4324	T	1.189	0.2756	1.141
	6	rs1361109	126771143	T	0.4673	0.4324	C	1.365	0.2427	1.151
	6	rs1572569	126771687	A	0.4673	0.4311	G	1.467	0.2258	1.157
	6	rs2184967	126773487	T	0.465	0.4311	C	1.284	0.2571	1.147
	6	rs4559102	126773580	A	0.465	0.4311	G	1.284	0.2571	1.147
	6	rs9388494	126776094	T	0.465	0.4311	G	1.284	0.2571	1.147
	6	rs9375441	126778600	A	0.465	0.4311	G	1.284	0.2571	1.147
	6	rs4895808	126781434	T	0.465	0.4311	C	1.284	0.2571	1.147
	6	rs9388495	126782457	A	0.4673	0.4311	G	1.467	0.2258	1.157
	6	rs9388496	126785062	G	0.465	0.4311	A	1.284	0.2571	1.147
	6	rs1844594	126788107	A	0.4673	0.4311	G	1.467	0.2258	1.157
	6	rs9398809	126789144	T	0.465	0.4311	C	1.284	0.2571	1.147
	6	rs9385401	126789472	T	0.465	0.4311	C	1.284	0.2571	1.147
	6	rs9401883	126797111	G	0.465	0.4311	A	1.284	0.2571	1.147
	6	rs1159619	126801144	A	0.4603	0.4311	C	0.9546	0.3285	1.125
	6	rs9375442	126803137	C	0.4673	0.4311	A	1.467	0.2258	1.157
	6	rs2050644	126805255	G	0.465	0.4311	A	1.284	0.2571	1.147
	6	rs4422634	126806676	C	0.465	0.4311	T	1.284	0.2571	1.147
	6	rs1120786	126808637	G	0.465	0.4311	T	1.284	0.2571	1.147
	6	rs9372839	126809870	A	0.465	0.4311	G	1.284	0.2571	1.147
	6	rs2326451	126811928	T	0.465	0.4298	A	1.383	0.2395	1.153
	6	rs9398810	126815604	A	0.465	0.4311	C	1.284	0.2571	1.147
	6	rs4418209	126819699	G	0.465	0.4311	T	1.284	0.2571	1.147
	6	rs9372840	126822635	C	0.465	0.4324	A	1.189	0.2756	1.141
	6	rs9401885	126825837	G	0.465	0.4311	C	1.284	0.2571	1.147
	6	rs2130603	126826819	C	0.465	0.4311	A	1.284	0.2571	1.147
	6	rs7738135	126829981	A	0.465	0.4311	G	1.284	0.2571	1.147
	6	rs4053271	126830512	C	0.465	0.4311	T	1.284	0.2571	1.147
	6	rs1490387	126834083	A	0.465	0.4311	C	1.284	0.2571	1.147
	6	rs9375446	126835015	A	0.465	0.4311	G	1.284	0.2571	1.147
	6	rs1490388	126835655	T	0.465	0.4311	C	1.284	0.2571	1.147
	6	rs1907067	126837663	C	0.465	0.4311	A	1.284	0.2571	1.147
	6	rs1490384	126851160	T	0.493	0.4719	C	0.4916	0.4832	1.088
23	6	rs9460213	170377812	C	0.1308	0.1212	T	0.2373	0.6262	1.092
	6	rs924043	170379025	T	0.1308	0.1212	C	0.2373	0.6262	1.092
	6	rs924045	170382137	C	0.1262	0.1148	T	0.342	0.5587	1.113
	6	rs924046	170382288	T	0.1262	0.1148	G	0.342	0.5587	1.113
	6	rs7764906	170382654	T	0.1262	0.1148	C	0.342	0.5587	1.113
	6	rs4235991	170382923	G	0.1285	0.1161	A	0.4039	0.5251	1.123
	6	rs874105	170383701	A	0.1285	0.1161	G	0.4039	0.5251	1.123
	6	rs9460225	170384030	T	0.1262	0.1148	G	0.342	0.5587	1.113
	6	rs1390310	170384662	T	0.1262	0.1148	C	0.342	0.5587	1.113
	6	rs1580720	170387376	G	0.1238	0.1148	C	0.2172	0.6412	1.09
	6	rs9356666	170387400	C	0.1262	0.1148	T	0.342	0.5587	1.113
	6	rs1390309	170387741	T	0.1262	0.1148	C	0.342	0.5587	1.113
	6	rs4710841	170389364	T	0.1262	0.1148	C	0.342	0.5587	1.113
	6	rs9460232	170389453	C	0.1285	0.1161	T	0.4039	0.5251	1.123
	6	rs9348281	170389665	T	0.1262	0.1148	C	0.342	0.5587	1.113
	6	rs4710735	170389782	C	0.1262	0.1148	G	0.342	0.5587	1.113
	6	rs74301117	170390047	G	0.1238	0.1148	A	0.2172	0.6412	1.09
	6	rs7763066	170390256	G	0.1285	0.1173	T	0.3234	0.5696	1.109
	6	rs12525952	170390602	T	0.1238	0.1148	G	0.2172	0.6412	1.09
24	7	rs7805778	26694926	A	0.2056	0.2283	G	0.8312	0.3619	0.8748
	7	rs212838	26698194	T	0.2079	0.2309	C	0.8402	0.3593	0.8746
	7	rs3757654	26711104	T	0.2079	0.2258	C	0.5133	0.4737	0.9003
	7	rs212848	26722155	G	0.2103	0.2347	T	0.9431	0.3315	0.8683
	7	rs212850	26724279	T	0.2103	0.2347	G	0.9431	0.3315	0.8683
	7	rs212856	26729205	T	0.2103	0.2347	C	0.9431	0.3315	0.8683
	7	rs212857	26730200	C	0.2103	0.2347	A	0.9431	0.3315	0.8683
	7	rs4719877	26736220	A	0.2103	0.2347	G	0.9431	0.3315	0.8683
	7	rs6461962	26746304	A	0.2103	0.2347	T	0.9431	0.3315	0.8683
	7	rs6972378	26753074	C	0.2033	0.2296	T	1.117	0.2906	0.8561
	7	rs6951065	26756162	G	0.2033	0.2296	A	1.117	0.2906	0.8561
	7	rs6964817	26756424	G	0.2033	0.2296	C	1.117	0.2906	0.8561
	7	rs2106905	26766851	T	0.2033	0.2309	C	1.224	0.2685	0.85
	7	rs6461963	26772491	G	0.2033	0.2309	A	1.224	0.2685	0.85
	7	rs4722630	26773364	G	0.2033	0.2309	T	1.224	0.2685	0.85
	7	rs6971397	26782564	C	0.2033	0.227	T	0.9156	0.3386	0.8686
	7	rs727448	26787426	T	0.2033	0.227	C	0.9156	0.3386	0.8686
	7	rs727450	26787642	G	0.2033	0.227	A	0.9156	0.3386	0.8686
	7	rs10281261	26789472	T	0.2033	0.2309	C	1.224	0.2685	0.85
	7	rs7457076	26793215	C	0.2033	0.2309	T	1.224	0.2685	0.85
	7	rs2189017	26795073	A	0.2033	0.2309	G	1.224	0.2685	0.85
	7	rs2189019	26798581	G	0.2033	0.2309	A	1.224	0.2685	0.85
	7	rs73061894	26802085	C	0.2033	0.2309	T	1.224	0.2685	0.85
	7	rs112979042	26805212	C	0.2033	0.227	T	0.9156	0.3386	0.8686
	7	rs10486478	26819465	T	0.1986	0.2245	C	1.098	0.2946	0.8561
	7	rs3801850	26820577	C	0.2009	0.2258	T	1.005	0.3162	0.8624
	7	rs12536560	26822876	C	0.1986	0.2258	G	1.206	0.2721	0.8498
	7	rs73065504	26825984	G	0.1986	0.2245	A	1.098	0.2946	0.8561
	7	rs10267950	26826757	A	0.1986	0.2258	T	1.206	0.2721	0.8498
	7	rs112439431	26827035	A	0.1986	0.2245	G	1.098	0.2946	0.8561
	7	rs10272303	26827815	C	0.1986	0.2258	T	1.206	0.2721	0.8498
	7	rs3801846	26828653	T	0.1939	0.2258	C	1.666	0.1968	0.825
	7	rs1327988	26828965	C	0.1939	0.2258	G	1.666	0.1968	0.825
	7	rs3801844	26829759	G	0.1939	0.2258	A	1.666	0.1968	0.825
	7	rs3801843	26830201	C	0.1939	0.2258	T	1.666	0.1968	0.825
	7	rs3801842	26830263	T	0.1939	0.2258	C	1.666	0.1968	0.825
	7	rs73065517	26830555	C	0.1939	0.2258	T	1.666	0.1968	0.825
	7	rs28733208	26830825	A	0.1939	0.2258	G	1.666	0.1968	0.825
	7	rs73065521	26831409	A	0.1939	0.2258	C	1.666	0.1968	0.825
	7	rs3801840	26832986	G	0.1939	0.2258	A	1.666	0.1968	0.825
	7	rs1327989	26833563	T	0.1939	0.2258	C	1.666	0.1968	0.825
	7	rs6964094	26834380	G	0.1939	0.2245	C	1.539	0.2147	0.8311
	7	rs6956088	26835727	A	0.1939	0.2258	T	1.666	0.1968	0.825
	7	rs10276471	26837940	G	0.1939	0.2258	C	1.666	0.1968	0.825
	7	rs4722641	26838677	G	0.1939	0.2258	C	1.666	0.1968	0.825
	7	rs10225924	26839954	T	0.1939	0.2258	C	1.666	0.1968	0.825
	7	rs10229837	26840652	A	0.1939	0.2258	G	1.666	0.1968	0.825
	7	rs12532395	26841702	A	0.1939	0.2258	G	1.666	0.1968	0.825
	7	rs10215738	26843462	C	0.1939	0.2258	T	1.666	0.1968	0.825
	7	rs4722643	26844230	T	0.1893	0.2181	C	1.4	0.2367	0.8368
	7	rs12539719	26844852	T	0.1963	0.2258	A	1.426	0.2324	0.8374
	7	rs4722644	26845386	A	0.1963	0.227	C	1.548	0.2134	0.8313
	7	rs12333525	26847762	T	0.1963	0.227	C	1.548	0.2134	0.8313
	7	rs10244986	26849558	A	0.1963	0.227	C	1.548	0.2134	0.8313
	7	rs73067435	26850195	C	0.1963	0.227	T	1.548	0.2134	0.8313
	7	rs73067437	26850313	C	0.1963	0.2258	T	1.426	0.2324	0.8374
	7	rs57135974	26850699	A	0.1963	0.227	C	1.548	0.2134	0.8313
	7	rs58760954	26850776	T	0.1963	0.227	C	1.548	0.2134	0.8313
	7	rs73067443	26851074	G	0.1963	0.227	A	1.548	0.2134	0.8313
	7	rs3801837	26851361	G	0.1963	0.227	A	1.548	0.2134	0.8313
	7	rs3801836	26851400	T	0.1963	0.2258	C	1.426	0.2324	0.8374
	7	rs3801834	26852062	C	0.1963	0.227	T	1.548	0.2134	0.8313
	7	rs3801833	26852212	T	0.1963	0.2258	C	1.426	0.2324	0.8374
	7	rs3801832	26852280	T	0.1963	0.2258	C	1.426	0.2324	0.8374
	7	rs17315334	26852860	A	0.1963	0.227	G	1.548	0.2134	0.8313
	7	rs73067456	26852998	A	0.1963	0.227	G	1.548	0.2134	0.8313
	7	rs3801831	26853470	C	0.1963	0.227	T	1.548	0.2134	0.8313
	7	rs3823938	26853741	G	0.1963	0.227	A	1.548	0.2134	0.8313
	7	rs3823936	26853830	G	0.1963	0.227	A	1.548	0.2134	0.8313
	7	rs3823934	26853934	C	0.1963	0.2258	T	1.426	0.2324	0.8374
	7	rs3823933	26853966	C	0.1963	0.227	T	1.548	0.2134	0.8313
	7	rs3823932	26853980	C	0.1963	0.227	T	1.548	0.2134	0.8313
	7	rs3823931	26854026	C	0.1963	0.227	T	1.548	0.2134	0.8313
	7	rs10262414	26854266	T	0.1963	0.227	C	1.548	0.2134	0.8313
	7	rs12532199	26854375	G	0.1963	0.227	A	1.548	0.2134	0.8313
	7	rs12537323	26854388	T	0.1963	0.227	C	1.548	0.2134	0.8313
	7	rs28617235	26854671	G	0.1963	0.227	A	1.548	0.2134	0.8313
	7	rs12532796	26854828	G	0.1963	0.2258	A	1.426	0.2324	0.8374
	7	rs3801830	26854870	G	0.1963	0.227	A	1.548	0.2134	0.8313
	7	rs3801829	26854996	C	0.1963	0.227	G	1.548	0.2134	0.8313
	7	rs10266759	26855282	A	0.1963	0.2258	G	1.426	0.2324	0.8374
	7	rs3801828	26855284	A	0.1963	0.2258	C	1.426	0.2324	0.8374
	7	rs6948584	26855732	A	0.1963	0.227	G	1.548	0.2134	0.8313
	7	rs6948657	26855943	T	0.1963	0.2258	C	1.426	0.2324	0.8374
	7	rs73067472	26855959	C	0.1963	0.2258	T	1.426	0.2324	0.8374
	7	rs3823930	26856525	C	0.1963	0.227	T	1.548	0.2134	0.8313
	7	rs3823929	26856600	C	0.1963	0.227	T	1.548	0.2134	0.8313
	7	rs3801827	26856626	T	0.1963	0.227	C	1.548	0.2134	0.8313
	7	rs3801826	26856720	T	0.1963	0.2258	C	1.426	0.2324	0.8374
	7	rs3801825	26856959	A	0.1963	0.227	T	1.548	0.2134	0.8313
	7	rs73067475	26857120	T	0.1963	0.227	C	1.548	0.2134	0.8313
	7	rs73067476	26857240	G	0.1963	0.227	A	1.548	0.2134	0.8313
	7	rs73067479	26857751	C	0.1963	0.227	T	1.548	0.2134	0.8313
	7	rs138144949	26857828	A	0.1963	0.2258	G	1.426	0.2324	0.8374
	7	rs28806787	26857837	A	0.1963	0.227	T	1.548	0.2134	0.8313
	7	rs10272301	26857898	C	0.1963	0.227	T	1.548	0.2134	0.8313
	7	rs10275896	26858395	C	0.1963	0.227	T	1.548	0.2134	0.8313
	7	rs12537014	26858650	A	0.1963	0.227	G	1.548	0.2134	0.8313
	7	rs17315775	26860134	C	0.1963	0.227	T	1.548	0.2134	0.8313
	7	rs28404962	26860324	C	0.1963	0.227	T	1.548	0.2134	0.8313
	7	rs13438513	26860633	C	0.1963	0.227	G	1.548	0.2134	0.8313
	7	rs13438514	26860688	A	0.1963	0.227	G	1.548	0.2134	0.8313
	7	rs55739485	26860741	C	0.1963	0.227	T	1.548	0.2134	0.8313
	7	rs3801823	26861031	C	0.1963	0.227	T	1.548	0.2134	0.8313
	7	rs3801822	26861201	C	0.1963	0.227	T	1.548	0.2134	0.8313
	7	rs3801821	26861206	T	0.1963	0.227	C	1.548	0.2134	0.8313
	7	rs3801820	26861353	G	0.1963	0.227	A	1.548	0.2134	0.8313
	7	rs7785689	26861609	A	0.1963	0.227	G	1.548	0.2134	0.8313
	7	rs7785711	26861640	A	0.1963	0.227	G	1.548	0.2134	0.8313
	7	rs7785798	26861943	G	0.1963	0.227	A	1.548	0.2134	0.8313
	7	rs7785918	26861959	T	0.1963	0.227	C	1.548	0.2134	0.8313
	7	rs59254259	26862464	G	0.1963	0.227	T	1.548	0.2134	0.8313
	7	rs28816386	26862805	G	0.1963	0.227	A	1.548	0.2134	0.8313
	7	rs113003633	26862983	T	0.1963	0.227	C	1.548	0.2134	0.8313
	7	rs12540045	26863174	G	0.1963	0.227	C	1.548	0.2134	0.8313
	7	rs10248500	26863294	C	0.1963	0.227	A	1.548	0.2134	0.8313
	7	rs17315929	26864173	T	0.1963	0.227	C	1.548	0.2134	0.8313
	7	rs10227673	26865299	A	0.1963	0.227	G	1.548	0.2134	0.8313
	7	rs7805766	26865610	G	0.1963	0.227	C	1.548	0.2134	0.8313
	7	rs17375272	26866497	T	0.1963	0.227	C	1.548	0.2134	0.8313
	7	rs3801819	26866698	G	0.1963	0.2258	T	1.426	0.2324	0.8374
	7	rs61354389	26868343	T	0.1963	0.227	C	1.548	0.2134	0.8313
	7	rs12540508	26868635	A	0.1963	0.227	G	1.548	0.2134	0.8313
	7	rs10225700	26869880	T	0.1939	0.227	C	1.797	0.1801	0.8191
	7	rs10241234	26869887	A	0.1939	0.227	T	1.797	0.1801	0.8191
	7	rs10225904	26869888	A	0.1939	0.227	G	1.797	0.1801	0.8191
	7	rs28550029	26872581	T	0.1963	0.227	C	1.548	0.2134	0.8313
	7	rs1967332	26872988	A	0.1963	0.227	C	1.548	0.2134	0.8313
	7	rs113360640	26873194	C	0.1963	0.2258	G	1.426	0.2324	0.8374
	7	rs28883078	26875063	T	0.1963	0.227	C	1.548	0.2134	0.8313
	7	rs149948351	26875969	C	0.1963	0.227	A	1.548	0.2134	0.8313
	7	rs56154570	26876579	A	0.1963	0.227	G	1.548	0.2134	0.8313
	7	rs12534899	26877189	C	0.1963	0.227	T	1.548	0.2134	0.8313
	7	rs12534921	26877210	C	0.1963	0.227	T	1.548	0.2134	0.8313
	7	rs73069507	26877536	G	0.1963	0.2258	A	1.426	0.2324	0.8374
	7	rs73069510	26877567	C	0.1963	0.2258	T	1.426	0.2324	0.8374
	7	rs3801816	26881177	A	0.1963	0.2258	G	1.426	0.2324	0.8374
	7	rs3801815	26881292	C	0.1963	0.2258	T	1.426	0.2324	0.8374
	7	rs3801814	26881302	G	0.1963	0.2258	T	1.426	0.2324	0.8374
	7	rs12535784	26882067	A	0.1963	0.2258	G	1.426	0.2324	0.8374
	7	rs4719882	26882252	G	0.1963	0.2258	A	1.426	0.2324	0.8374
	7	rs1982995	26884135	C	0.1963	0.2258	A	1.426	0.2324	0.8374
	7	rs10236221	26884671	T	0.1963	0.2258	A	1.426	0.2324	0.8374
	7	rs10270187	26885885	G	0.1963	0.2258	C	1.426	0.2324	0.8374
	7	rs10227529	26886309	A	0.1963	0.2258	T	1.426	0.2324	0.8374
	7	rs10251839	26886468	T	0.1963	0.2258	C	1.426	0.2324	0.8374
	7	rs3801813	26887069	C	0.1963	0.2258	T	1.426	0.2324	0.8374
	7	rs3801812	26887615	T	0.1963	0.2258	C	1.426	0.2324	0.8374
	7	rs10272190	26887942	A	0.1963	0.2258	T	1.426	0.2324	0.8374
	7	rs10227231	26888074	G	0.1963	0.2258	A	1.426	0.2324	0.8374
	7	rs10272457	26888155	C	0.1963	0.2258	T	1.426	0.2324	0.8374
	7	rs10272603	26888277	C	0.1963	0.2258	T	1.426	0.2324	0.8374
	7	rs6461979	26888918	C	0.1963	0.2245	T	1.309	0.2525	0.8436
	7	rs17376018	26889862	G	0.1963	0.2258	A	1.426	0.2324	0.8374
	7	rs4722647	26890446	C	0.1963	0.2258	G	1.426	0.2324	0.8374
	7	rs3934268	26890572	C	0.1963	0.2258	G	1.426	0.2324	0.8374
	7	rs2031811	26890672	C	0.1963	0.2258	T	1.426	0.2324	0.8374
	7	rs2030136	26891016	C	0.1986	0.2258	T	1.206	0.2721	0.8498
	7	rs7804356	26891665	C	0.1986	0.2258	T	1.206	0.2721	0.8498
	7	rs7804620	26891831	G	0.1986	0.2258	T	1.206	0.2721	0.8498
	7	rs73069533	26892325	A	0.1986	0.2245	G	1.098	0.2946	0.8561
	7	rs10486483	26892440	A	0.1986	0.2258	G	1.206	0.2721	0.8498
	7	rs3801810	26892531	A	0.1986	0.2258	G	1.206	0.2721	0.8498
	7	rs3823928	26893317	C	0.1986	0.2258	T	1.206	0.2721	0.8498
	7	rs7791513	26893357	C	0.1986	0.2258	A	1.206	0.2721	0.8498
	7	rs3213853	26893524	C	0.1986	0.2258	T	1.206	0.2721	0.8498
	7	rs6461980	26894123	G	0.1986	0.2258	T	1.206	0.2721	0.8498
	7	rs12536145	26894860	T	0.1986	0.2258	A	1.206	0.2721	0.8498
	7	rs10242572	26895065	C	0.1986	0.2258	T	1.206	0.2721	0.8498
	7	rs10256250	26895080	T	0.1986	0.2258	A	1.206	0.2721	0.8498
	7	rs3801809	26895456	A	0.1986	0.2258	G	1.206	0.2721	0.8498
	7	rs3801808	26896555	A	0.1986	0.2258	T	1.206	0.2721	0.8498
	7	rs3801807	26897439	C	0.1986	0.2258	T	1.206	0.2721	0.8498
	7	rs3801805	26897640	G	0.1986	0.2258	A	1.206	0.2721	0.8498
	7	rs10486485	26900356	A	0.1916	0.2168	C	1.072	0.3006	0.856
	7	rs3801803	26901740	C	0.1916	0.2168	T	1.072	0.3006	0.856
	7	rs73069539	26903661	T	0.1916	0.2156	C	0.9689	0.3249	0.8624
	7	rs17323934	26904330	G	0.1893	0.2105	C	0.7697	0.3803	0.8757
	7	rs73069540	26904770	T	0.1893	0.2105	C	0.7697	0.3803	0.8757
	7	rs73069541	26904928	G	0.1893	0.2105	A	0.7697	0.3803	0.8757
	7	rs12540388	26905731	T	0.1893	0.2105	A	0.7697	0.3803	0.8757
	7	rs2391362	26907123	C	0.1986	0.2207	T	0.8045	0.3698	0.8752
	7	rs76438067	26911904	T	0.1916	0.2105	C	0.6076	0.4357	0.8891
25	7	rs78615563	28149712	T	0.1308	0.139	C	0.1579	0.6911	0.9322
	7	rs77181159	28172124	A	0.1379	0.1378	G	2.119e-05	0.9963	1.001
	7	rs79131915	28188046	A	0.1355	0.1492	C	0.4219	0.516	0.8936
	7	rs530649	28202430	G	0.1472	0.1594	A	0.3166	0.5736	0.91
	7	rs849320	28208836	T	0.1472	0.1594	G	0.3166	0.5736	0.91
	7	rs515013	28216196	C	0.1495	0.1594	T	0.2064	0.6496	0.9269
	7	rs849334	28223842	T	0.1472	0.1594	C	0.3166	0.5736	0.91
	7	rs565317	28225514	T	0.1472	0.1594	A	0.3166	0.5736	0.91
	7	rs550448	28229042	G	0.1472	0.1594	A	0.3166	0.5736	0.91
	7	rs849328	28233408	C	0.1472	0.1607	A	0.3844	0.5353	0.9014
	7	rs849329	28234599	A	0.1752	0.1747	G	0.0004582	0.9829	1.003
	7	rs849315	28238860	A	0.1776	0.1747	G	0.01526	0.9017	1.02
	7	rs849316	28242834	A	0.1776	0.1747	C	0.01526	0.9017	1.02
	7	rs527637	28254638	T	0.1776	0.1735	C	0.03226	0.8575	1.029
26	7	rs62447205	50465830	G	0.271	0.2526	A	0.4924	0.4829	1.1
	7	rs11978267	50466304	G	0.271	0.2526	A	0.4924	0.4829	1.1
	7	rs6973210	50466695	A	0.271	0.2526	G	0.4924	0.4829	1.1
	7	rs6960400	50466797	G	0.271	0.2526	A	0.4924	0.4829	1.1
	7	rs10278451	50468952	T	0.2664	0.2487	G	0.4531	0.5009	1.097
	7	rs11552047	50469551	T	0.2664	0.2487	C	0.4531	0.5009	1.097
	7	rs11980379	50469981	C	0.2664	0.2487	T	0.4531	0.5009	1.097
	7	rs4132601	50470604	G	0.2664	0.2487	T	0.4531	0.5009	1.097
	7	rs11980407	50471613	A	0.2664	0.2487	G	0.4531	0.5009	1.097
	7	rs62445866	50472324	A	0.2664	0.2487	G	0.4531	0.5009	1.097
	7	rs58923657	50472842	T	0.2664	0.2487	C	0.4531	0.5009	1.097
	7	rs6964969	50473251	G	0.264	0.2462	A	0.4672	0.4943	1.098
	7	rs6956014	50473290	C	0.2407	0.2156	T	1.002	0.3169	1.153
	7	rs28462675	50473870	G	0.2664	0.2487	A	0.4531	0.5009	1.097
	7	rs10264390	50475321	C	0.2664	0.2487	T	0.4531	0.5009	1.097
	7	rs28696237	50475831	G	0.2664	0.2449	C	0.6754	0.4112	1.119
	7	rs10230978	50477144	A	0.2664	0.2449	G	0.6754	0.4112	1.119
	7	rs10272724	50477213	C	0.2664	0.2449	T	0.6754	0.4112	1.119
	7	rs17133805	50477514	G	0.2664	0.2449	T	0.6754	0.4112	1.119
	7	rs62445869	50477611	A	0.264	0.2449	G	0.5375	0.4635	1.106
	7	rs17133807	50477687	A	0.2664	0.2449	G	0.6754	0.4112	1.119
	7	rs1110701	50478627	G	0.2804	0.273	A	0.07624	0.7825	1.038
27	8	rs12679857	119977337	G	0.278	0.3036	A	0.8687	0.3513	0.8835
28	9	rs4380994	4282536	G	0.4813	0.4847	A	0.01271	0.9102	0.9865
	9	rs10974435	4283682	C	0.4813	0.4821	T	0.0007721	0.9778	0.9967
	9	rs10758591	4285986	C	0.4813	0.4847	G	0.01271	0.9102	0.9865
	9	rs7024686	4287211	C	0.4813	0.4821	G	0.0007721	0.9778	0.9967
	9	rs7041847	4287466	G	0.4836	0.4847	A	0.00122	0.9721	0.9958
	9	rs7034200	4289050	A	0.5093	0.4936	C	0.2738	0.6008	1.065
	9	rs10814914	4289196	C	0.4836	0.4834	T	5.687e-05	0.994	1.001
	9	rs6476842	4291268	T	0.4626	0.4681	C	0.0336	0.8546	0.9782
	9	rs7020673	4291747	C	0.4813	0.4783	G	0.009931	0.9206	1.012
	9	rs7867224	4292152	G	0.4836	0.486	A	0.005989	0.9383	0.9907
	9	rs10814916	4293150	A	0.4766	0.4898	C	0.192	0.6613	0.9487
	9	rs4339696	4295880	T	0.472	0.4643	G	0.06555	0.7979	1.031
	9	rs10814917	4296430	G	0.472	0.4745	A	0.007093	0.9329	0.9899
29	10	rs706778	6098949	T	0.4322	0.4247	C	0.0636	0.8009	1.031
	10	rs7072793	6106266	C	0.4322	0.4286	T	0.01523	0.9018	1.015
	10	rs7073236	6106552	C	0.4322	0.4286	T	0.01523	0.9018	1.015
	10	rs7096384	6106638	T	0.4322	0.4286	C	0.01523	0.9018	1.015
	10	rs10795791	6108340	G	0.4322	0.4286	A	0.01523	0.9018	1.015
30	10	rs2387397	6390192	G	0.2243	0.2245	C	5.786e-05	0.9939	0.9989
	10	rs947474	6390450	G	0.1963	0.1939	A	0.01004	0.9202	1.015
	10	rs2181623	6391491	C	0.215	0.2054	T	0.1544	0.6944	1.06
	10	rs4750316	6393260	C	0.2126	0.2054	G	0.0886	0.766	1.045
	10	rs10796035	6396623	G	0.2173	0.2028	A	0.3526	0.5526	1.091
	10	rs10796038	6397964	A	0.2009	0.1913	G	0.163	0.6864	1.063
	10	rs4558075	6401625	C	0.215	0.1964	T	0.5873	0.4435	1.12
	10	rs10752291	6402679	C	0.215	0.1964	G	0.5873	0.4435	1.12
	10	rs10796045	6402741	G	0.215	0.1977	T	0.5077	0.4762	1.111
	10	rs2146900	6403050	G	0.2126	0.1939	C	0.6065	0.4361	1.123
	10	rs1570527	6404700	T	0.2126	0.1939	G	0.6065	0.4361	1.123
31	10	rs61839082	6440578	T	0.2407	0.2423	C	0.004328	0.9475	0.9908
	10	rs586527	6448881	C	0.25	0.2423	T	0.08765	0.7672	1.042
	10	rs586511	6448894	G	0.25	0.2423	A	0.08765	0.7672	1.042
	10	rs586497	6448900	G	0.25	0.2423	A	0.08765	0.7672	1.042
	10	rs584724	6449286	G	0.25	0.2423	A	0.08765	0.7672	1.042
	10	rs11258629	6458306	T	0.2523	0.25	C	0.008043	0.9285	1.012
	10	rs17155549	6460644	G	0.236	0.2194	A	0.4368	0.5087	1.099
	10	rs11258672	6462613	G	0.236	0.2194	T	0.4368	0.5087	1.099
	10	rs667899	6464156	A	0.236	0.2232	G	0.2566	0.6125	1.075
	10	rs10906529	6465145	G	0.236	0.2232	C	0.2566	0.6125	1.075
	10	rs7920162	6465660	T	0.236	0.2194	C	0.4368	0.5087	1.099
	10	rs602756	6466280	T	0.2617	0.227	C	1.825	0.1767	1.207
	10	rs11258708	6466438	T	0.236	0.2194	C	0.4368	0.5087	1.099
	10	rs72781716	6466976	A	0.236	0.2194	G	0.4368	0.5087	1.099
	10	rs806399	6468605	A	0.2617	0.227	G	1.825	0.1767	1.207
	10	rs7910023	6468630	T	0.236	0.2194	C	0.4368	0.5087	1.099
	10	rs648731	6468731	A	0.2617	0.227	G	1.825	0.1767	1.207
	10	rs7082071	6470587	A	0.236	0.2194	G	0.4368	0.5087	1.099
	10	rs11258742	6471941	A	0.236	0.2194	C	0.4368	0.5087	1.099
	10	rs11258747	6472891	T	0.236	0.2194	G	0.4368	0.5087	1.099
	10	rs34157770	6473041	A	0.236	0.2194	C	0.4368	0.5087	1.099
	10	rs11258856	6486194	G	0.236	0.2168	A	0.5845	0.4445	1.116
	10	rs17372283	6486582	C	0.236	0.2168	G	0.5845	0.4445	1.116
	10	rs61840390	6488856	T	0.236	0.2168	C	0.5845	0.4445	1.116
	10	rs655732	6489109	A	0.2383	0.2245	G	0.2995	0.5842	1.081
	10	rs11258943	6498723	A	0.2313	0.2156	G	0.3986	0.5278	1.095
32	10	rs10509540	90023033	C	0.271	0.3048	T	1.529	0.2163	0.8478
	10	rs166976	90024599	G	0.2687	0.301	A	1.406	0.2356	0.8531
	10	rs286487	90030119	G	0.2757	0.3151	A	2.037	0.1535	0.8276
	10	rs2018705	90047350	G	0.2523	0.2793	T	1.024	0.3115	0.8707
	10	rs7068821	90051035	T	0.2523	0.2793	G	1.024	0.3115	0.8707
	10	rs60888743	90051317	G	0.2547	0.2806	A	0.9419	0.3318	0.876
33	10	rs11189651	100289199	G	0.285	0.3125	T	0.9884	0.3201	0.8771
	10	rs12358472	100290770	A	0.285	0.3125	C	0.9884	0.3201	0.8771
	10	rs7096013	100292164	C	0.285	0.3125	G	0.9884	0.3201	0.8771
	10	rs4917840	100293029	A	0.285	0.3125	T	0.9884	0.3201	0.8771
	10	rs898892	100293700	G	0.2874	0.3125	T	0.826	0.3634	0.8872
	10	rs10883118	100293897	A	0.285	0.3125	G	0.9884	0.3201	0.8771
	10	rs1809320	100294255	A	0.2874	0.3125	G	0.826	0.3634	0.8872
	10	rs10444018	100299203	A	0.2897	0.3138	G	0.7554	0.3848	0.8921
	10	rs10786436	100300182	T	0.3621	0.3661	C	0.01838	0.8922	0.9832
	10	rs35753423	100300735	C	0.2874	0.3099	T	0.6688	0.4135	0.8978
	10	rs11189655	100301280	T	0.2874	0.3099	C	0.6688	0.4135	0.8978
	10	rs1471352	100308348	C	0.2897	0.3099	T	0.5367	0.4638	0.9081
	10	rs596448	100308948	C	0.3621	0.3648	G	0.008377	0.9271	0.9886
	10	rs621644	100311667	A	0.3528	0.361	G	0.08031	0.7769	0.965
	10	rs650527	100313563	T	0.3528	0.361	C	0.08031	0.7769	0.965
	10	rs7907389	100314339	A	0.278	0.3061	G	1.048	0.3061	0.8729
	10	rs1252757	100316741	T	0.3528	0.361	C	0.08031	0.7769	0.965
	10	rs7097086	100317043	A	0.3528	0.361	G	0.08031	0.7769	0.965
	10	rs513772	100317638	A	0.3528	0.361	G	0.08031	0.7769	0.965
	10	rs10748739	100318693	T	0.278	0.3061	C	1.048	0.3061	0.8729
	10	rs489611	100318793	C	0.3528	0.361	T	0.08031	0.7769	0.965
	10	rs11815889	100324001	A	0.278	0.3061	C	1.048	0.3061	0.8729
	10	rs10883135	100326668	T	0.278	0.3061	G	1.048	0.3061	0.8729
	10	rs610498	100330451	A	0.3528	0.361	G	0.08031	0.7769	0.965
	10	rs10748743	100330502	T	0.278	0.3061	A	1.048	0.3061	0.8729
	10	rs4919242	100336481	C	0.2757	0.3023	T	0.9455	0.3309	0.8785
	10	rs4919243	100336482	G	0.2757	0.3023	C	0.9455	0.3309	0.8785
	10	rs10883140	100340086	T	0.2757	0.3023	C	0.9455	0.3309	0.8785
34	11	rs3842753	2181060	T	0.1612	0.3048	G	30.13	4.034e-08	0.4383
	11	rs689	2182224	A	0.1612	0.3061	T	30.61	3.162e-08	0.4357
	11	rs3842727	2184848	G	0.1846	0.3214	T	26.12	3.211e-07	0.4779
35	12	rs917911	9905851	C	0.3621	0.361	A	0.001671	0.9674	1.005
	12	rs4763879	9910164	A	0.3621	0.3597	G	0.007241	0.9322	1.011
36	12	rs1689510	56396768	C	0.4089	0.3253	G	8.458	0.003635	1.435
	12	rs772921	56403577	T	0.4089	0.3253	C	8.458	0.003635	1.435
	12	rs1701704	56412487	G	0.4089	0.3253	T	8.458	0.003635	1.435
	12	rs2456973	56416928	C	0.4089	0.3253	A	8.458	0.003635	1.435
	12	rs1702877	56427808	T	0.4089	0.3253	C	8.458	0.003635	1.435
	12	rs705704	56435412	A	0.4089	0.3253	G	8.458	0.003635	1.435
	12	rs34415530	56444632	T	0.4089	0.324	C	8.727	0.003136	1.443
	12	rs10876866	56445366	A	0.4089	0.324	G	8.727	0.003136	1.443
	12	rs61938962	56446766	T	0.4089	0.324	C	8.727	0.003136	1.443
	12	rs61938963	56446804	T	0.4089	0.324	C	8.727	0.003136	1.443
	12	rs7302200	56449435	A	0.4089	0.3227	G	9	0.002699	1.452
	12	rs2640564	56455294	T	0.4065	0.3227	C	8.528	0.003497	1.438
	12	rs2640562	56466473	T	0.4089	0.3278	C	7.933	0.004854	1.418
	12	rs3741499	56474379	T	0.4182	0.3291	C	9.542	0.002008	1.466
	12	rs4759229	56474480	A	0.4159	0.3291	G	9.058	0.002616	1.452
	12	rs877636	56480583	G	0.4136	0.3278	A	8.856	0.002922	1.446
	12	rs705696	56480648	A	0.4112	0.3253	G	8.927	0.002809	1.449
	12	rs2292239	56482180	T	0.4159	0.3265	G	9.617	0.001928	1.468
37	12	rs10774624	111833788	A	0.3995	0.4898	G	9.087	0.002574	0.6931
	12	rs7310615	111865049	G	0.3949	0.4923	C	10.6	0.001131	0.6728
	12	rs3184504	111884608	C	0.3972	0.4923	T	10.1	0.001487	0.6794
	12	rs4766578	111904371	A	0.3972	0.4847	T	8.551	0.003453	0.7005
	12	rs10774625	111910219	G	0.3949	0.4834	A	8.765	0.00307	0.6973
	12	rs7137828	111932800	T	0.4019	0.4911	C	8.87	0.002899	0.6963
	12	rs597808	111973358	G	0.3972	0.4898	A	9.566	0.001982	0.6864
	12	rs653178	112007756	T	0.3972	0.4911	C	9.829	0.001718	0.6829
	12	rs11065979	112059557	T	0.5397	0.4541	C	8.13	0.004354	1.41
38	13	rs539514	76326282	A	0.4533	0.4656	T	0.1683	0.6816	0.9517
	13	rs625755	76326701	G	0.4533	0.4656	A	0.1683	0.6816	0.9517
	13	rs7997101	76334818	T	0.4836	0.4821	C	0.002501	0.9601	1.006
	13	rs530855	76337780	A	0.4509	0.4643	C	0.1987	0.6558	0.9476
39	13	rs9517712	100079833	T	0.243	0.2691	C	0.9836	0.3213	0.8717
	13	rs9585056	100081766	C	0.2407	0.2679	T	1.07	0.3011	0.8663
40	14	rs10137082	23840033	T	0.2547	0.2066	C	3.681	0.05505	1.312
41	14	rs2236263	69261162	A	0.2804	0.2755	T	0.03268	0.8565	1.025
	14	rs3742887	69262441	A	0.25	0.2564	G	0.05941	0.8074	0.9668
	14	rs1465788	69263599	T	0.2523	0.2564	C	0.0238	0.8774	0.9789
	14	rs1595260	69267695	A	0.2523	0.2564	T	0.0238	0.8774	0.9789
	14	rs1595261	69268399	C	0.2523	0.2564	A	0.0238	0.8774	0.9789
	14	rs194751	69270727	C	0.2523	0.2564	T	0.0238	0.8774	0.9789
	14	rs1836984	69270891	A	0.2523	0.2564	G	0.0238	0.8774	0.9789
	14	rs4899258	69272319	G	0.2547	0.2577	T	0.01289	0.9096	0.9845
	14	rs7149271	69272643	C	0.2547	0.2577	T	0.01289	0.9096	0.9845
42	14	rs11628807	98485111	T	0.2804	0.2997	G	0.5016	0.4788	0.9102
	14	rs4383076	98485127	A	0.2804	0.2997	T	0.5016	0.4788	0.9102
	14	rs11628876	98485308	T	0.2804	0.2997	A	0.5016	0.4788	0.9102
	14	rs11160429	98485440	G	0.2804	0.2997	C	0.5016	0.4788	0.9102
	14	rs10138574	98485515	A	0.2804	0.2997	G	0.5016	0.4788	0.9102
	14	rs10150955	98485583	T	0.2804	0.2997	C	0.5016	0.4788	0.9102
	14	rs10138969	98485805	C	0.2804	0.2997	G	0.5016	0.4788	0.9102
	14	rs10138885	98485820	A	0.2804	0.2997	G	0.5016	0.4788	0.9102
	14	rs922406	98486020	T	0.2804	0.2997	C	0.5016	0.4788	0.9102
	14	rs922407	98486053	G	0.2804	0.2997	A	0.5016	0.4788	0.9102
	14	rs922408	98486120	G	0.2967	0.2997	A	0.01202	0.9127	0.9857
	14	rs922409	98486231	G	0.2967	0.2997	A	0.01202	0.9127	0.9857
	14	rs2895665	98486373	T	0.2804	0.2997	C	0.5016	0.4788	0.9102
	14	rs10142119	98486545	G	0.2804	0.2997	A	0.5016	0.4788	0.9102
	14	rs7143957	98486622	T	0.2804	0.2997	C	0.5016	0.4788	0.9102
	14	rs7143039	98486883	A	0.2804	0.2997	G	0.5016	0.4788	0.9102
	14	rs8011031	98487343	G	0.2804	0.2997	A	0.5016	0.4788	0.9102
	14	rs3902659	98487447	G	0.2804	0.2997	A	0.5016	0.4788	0.9102
	14	rs1988588	98487507	T	0.2804	0.2997	A	0.5016	0.4788	0.9102
	14	rs10134419	98487587	T	0.2804	0.2997	C	0.5016	0.4788	0.9102
	14	rs7148853	98487763	A	0.2804	0.2997	T	0.5016	0.4788	0.9102
	14	rs1456988	98488007	G	0.2804	0.2997	T	0.5016	0.4788	0.9102
	14	rs1456989	98488804	T	0.2804	0.2997	C	0.5016	0.4788	0.9102
	14	rs1456990	98488886	A	0.2804	0.2997	G	0.5016	0.4788	0.9102
	14	rs1350275	98489306	T	0.278	0.2985	G	0.5599	0.4543	0.9052
	14	rs1350276	98489408	A	0.2804	0.2997	G	0.5016	0.4788	0.9102
	14	rs10137906	98490569	G	0.2967	0.2997	A	0.01202	0.9127	0.9857
	14	rs4144155	98491332	A	0.285	0.2997	G	0.2878	0.5916	0.9314
	14	rs1350277	98492843	C	0.2804	0.2997	T	0.5016	0.4788	0.9102
	14	rs28480229	98494678	A	0.2804	0.2997	C	0.5016	0.4788	0.9102
	14	rs7144501	98495938	G	0.2967	0.2997	A	0.01202	0.9127	0.9857
	14	rs36025852	98496132	G	0.285	0.2997	A	0.2878	0.5916	0.9314
	14	rs11622689	98496560	G	0.2967	0.2997	T	0.01202	0.9127	0.9857
	14	rs4900384	98498951	G	0.2874	0.2985	A	0.1638	0.6857	0.9479
43	14	rs941576	101306045	G	0.3879	0.4222	A	1.35	0.2453	0.8671
	14	rs56994090	101306447	C	0.3738	0.3929	T	0.4228	0.5156	0.9227
	14	rs8022656	101307542	G	0.3785	0.4209	A	2.065	0.1507	0.8379
	14	rs34337125	101307703	A	0.3411	0.375	G	1.374	0.2411	0.8629
44	15	rs56059718	38836777	A	0.2126	0.1964	C	0.4499	0.5024	1.105
	15	rs72727394	38847022	T	0.222	0.2143	C	0.09603	0.7566	1.046
	15	rs55728265	38856961	T	0.215	0.2117	C	0.01712	0.8959	1.019
	15	rs28438860	38858062	C	0.2243	0.2258	T	0.003411	0.9534	0.9916
	15	rs17651741	38869666	A	0.2056	0.1964	G	0.146	0.7024	1.059
45	15	rs4779112	79220586	G	0.3037	0.3278	A	0.7379	0.3903	0.8945
	15	rs7496812	79222924	C	0.3014	0.3253	T	0.7278	0.3936	0.895
	15	rs2289699	79223681	A	0.3014	0.3265	G	0.8066	0.3691	0.8898
	15	rs11638844	79231518	A	0.3061	0.3418	G	1.603	0.2054	0.8492
	15	rs10400902	79231616	A	0.3061	0.3418	G	1.603	0.2054	0.8492
	15	rs11072815	79232319	A	0.3107	0.3418	G	1.209	0.2716	0.868
	15	rs11856301	79232330	T	0.3107	0.3418	C	1.209	0.2716	0.868
	15	rs28655102	79232700	C	0.3107	0.3418	T	1.209	0.2716	0.868
	15	rs10152587	79233225	T	0.3107	0.3431	C	1.308	0.2527	0.8631
	15	rs10152589	79233255	T	0.3107	0.3418	C	1.209	0.2716	0.868
	15	rs4778716	79233626	A	0.3107	0.3418	G	1.209	0.2716	0.868
	15	rs2870085	79234268	T	0.3107	0.3418	C	1.209	0.2716	0.868
	15	rs10400877	79234378	A	0.3107	0.3418	T	1.209	0.2716	0.868
	15	rs10400881	79234384	G	0.3107	0.3418	C	1.209	0.2716	0.868
	15	rs11855406	79234864	A	0.3107	0.3418	G	1.209	0.2716	0.868
	15	rs3825932	79235446	T	0.3131	0.3431	C	1.125	0.2889	0.8726
	15	rs11072817	79236815	G	0.2921	0.3278	A	1.639	0.2004	0.846
	15	rs11072818	79236933	A	0.2921	0.3278	G	1.639	0.2004	0.846
	15	rs1036937	79237180	C	0.2921	0.3265	A	1.527	0.2166	0.8509
	15	rs1036938	79237247	C	0.2921	0.3278	G	1.639	0.2004	0.846
	15	rs1036939	79237324	C	0.2921	0.3291	A	1.756	0.1851	0.8411
	15	rs1369324	79239719	A	0.2897	0.3265	G	1.743	0.1868	0.8413
46	16	rs7200940	11164567	G	0.2967	0.3597	C	4.909	0.02671	0.7511
	16	rs11860603	11165017	C	0.2967	0.3571	T	4.53	0.0333	0.7595
	16	rs7184615	11165542	C	0.3178	0.3852	G	5.457	0.01949	0.7434
	16	rs9934969	11166002	A	0.2967	0.3571	G	4.53	0.0333	0.7595
	16	rs11865121	11166688	A	0.2967	0.3571	C	4.53	0.0333	0.7595
	16	rs7198621	11167458	G	0.2967	0.3571	C	4.53	0.0333	0.7595
	16	rs7204643	11167603	C	0.2967	0.3571	T	4.53	0.0333	0.7595
	16	rs725613	11169683	G	0.3178	0.3839	T	5.258	0.02185	0.7474
	16	rs12925642	11171602	G	0.2967	0.3559	A	4.347	0.03708	0.7637
	16	rs2058531	11172109	C	0.2967	0.3571	T	4.53	0.0333	0.7595
	16	rs9652601	11174365	A	0.2967	0.3559	G	4.347	0.03708	0.7637
	16	rs9652582	11174564	A	0.2967	0.3546	G	4.166	0.04124	0.768
	16	rs2041670	11174652	A	0.2967	0.3546	G	4.166	0.04124	0.768
	16	rs12923098	11177053	C	0.2967	0.3559	T	4.347	0.03708	0.7637
	16	rs9931397	11177394	C	0.2967	0.3546	G	4.166	0.04124	0.768
	16	rs12708715	11177824	T	0.2967	0.3546	C	4.166	0.04124	0.768
	16	rs9929994	11178245	G	0.3178	0.3839	A	5.258	0.02185	0.7474
	16	rs12708716	11179873	G	0.3178	0.3827	A	5.062	0.02445	0.7514
	16	rs7192287	11180537	T	0.2967	0.3559	A	4.347	0.03708	0.7637
	16	rs9888908	11181244	A	0.2967	0.3546	C	4.166	0.04124	0.768
	16	rs7204099	11181756	C	0.3178	0.3839	T	5.258	0.02185	0.7474
	16	rs7203793	11182134	G	0.3178	0.3827	C	5.062	0.02445	0.7514
	16	rs12924729	11187783	A	0.2967	0.3571	G	4.53	0.0333	0.7595
	16	rs12919083	11188930	C	0.2967	0.3559	A	4.347	0.03708	0.7637
	16	rs12928537	11191400	A	0.2967	0.3571	G	4.53	0.0333	0.7595
	16	rs12927355	11194771	T	0.2967	0.3559	C	4.347	0.03708	0.7637
	16	rs741172	11200798	T	0.2967	0.3559	C	4.347	0.03708	0.7637
	16	rs9746695	11207894	C	0.2921	0.3559	T	5.073	0.0243	0.7467
	16	rs12935413	11210447	A	0.3131	0.3839	G	6.039	0.01399	0.7314
	16	rs7186106	11210831	A	0.3107	0.3852	G	6.67	0.009802	0.7196
47	16	rs80945	11343120	T	0.264	0.2156	C	3.641	0.05636	1.305
	16	rs181582	11343547	T	0.264	0.2156	C	3.641	0.05636	1.305
	16	rs149310	11345699	C	0.2687	0.2156	G	4.356	0.03688	1.337
	16	rs193779	11350965	A	0.2734	0.2219	G	4.013	0.04515	1.319
	16	rs193778	11351211	G	0.2734	0.2219	A	4.013	0.04515	1.319
	16	rs55870745	11355102	T	0.2734	0.2219	G	4.013	0.04515	1.319
	16	rs56350515	11355104	T	0.2734	0.2219	A	4.013	0.04515	1.319
	16	rs72771866	11355222	T	0.2734	0.2219	C	4.013	0.04515	1.319
	16	rs56069754	11362640	A	0.2734	0.2232	G	3.807	0.05102	1.309
48	16	rs12444268	20342572	A	0.3224	0.3214	T	0.001272	0.9715	1.005
49	16	rs149299	28485141	C	0.3621	0.3903	T	0.9313	0.3345	0.8869
	16	rs151179	28487056	G	0.3621	0.3929	A	1.106	0.293	0.8775
	16	rs151180	28487213	T	0.3972	0.4235	G	0.7876	0.3748	0.8971
	16	rs181195	28488369	T	0.3621	0.3903	A	0.9313	0.3345	0.8869
	16	rs34839	28489346	C	0.3995	0.4324	T	1.227	0.268	0.8734
	16	rs151181	28490517	C	0.3621	0.3941	T	1.199	0.2736	0.8728
	16	rs151303	28492510	A	0.3645	0.3916	C	0.861	0.3535	0.8911
	16	rs34838	28494350	G	0.4019	0.4337	A	1.148	0.284	0.8774
	16	rs42861	28494421	G	0.4019	0.4337	A	1.148	0.284	0.8774
	16	rs34836	28494823	G	0.4019	0.4337	A	1.148	0.284	0.8774
	16	rs151182	28495752	T	0.3645	0.3941	C	1.029	0.3104	0.8816
	16	rs151301	28497059	A	0.3645	0.3916	T	0.861	0.3535	0.8911
	16	rs34835	28499291	G	0.3762	0.4005	A	0.6884	0.4067	0.9026
	16	rs27741	28504181	A	0.3738	0.4018	G	0.9078	0.3407	0.8889
	16	rs149271	28506872	G	0.3598	0.3954	A	1.485	0.223	0.8594
	16	rs180743	28507644	G	0.3598	0.3954	C	1.485	0.223	0.8594
	16	rs180744	28508048	G	0.3598	0.3954	A	1.485	0.223	0.8594
	16	rs151174	28508069	T	0.3598	0.3929	C	1.282	0.2576	0.8686
	16	rs40831	28508447	G	0.3785	0.4082	A	1.017	0.3133	0.8831
	16	rs40834	28510393	T	0.4159	0.4503	C	1.328	0.2491	0.8693
	16	rs40836	28510537	G	0.4159	0.4503	A	1.328	0.2491	0.8693
	16	rs40837	28510845	G	0.4159	0.4503	A	1.328	0.2491	0.8693
	16	rs26528	28517709	C	0.4112	0.449	T	1.606	0.2051	0.8571
	16	rs153109	28519096	C	0.4112	0.449	T	1.606	0.2051	0.8571
	16	rs240707	28524612	G	0.4112	0.4515	C	1.829	0.1763	0.8484
	16	rs153106	28526897	C	0.3738	0.4056	T	1.171	0.2792	0.8749
	16	rs240705	28529716	T	0.3738	0.4069	C	1.266	0.2606	0.8703
	16	rs240704	28529949	C	0.3762	0.4056	T	1.004	0.3163	0.8836
	16	rs4787458	28531287	G	0.3224	0.3648	A	2.185	0.1394	0.8286
	16	rs240702	28531353	T	0.3738	0.4069	C	1.266	0.2606	0.8703
	16	rs62034319	28532188	G	0.3738	0.4069	T	1.266	0.2606	0.8703
	16	rs28698667	28533071	T	0.3738	0.4069	C	1.266	0.2606	0.8703
	16	rs62034321	28534038	T	0.3738	0.4069	C	1.266	0.2606	0.8703
	16	rs4788085	28535003	G	0.3738	0.4069	A	1.266	0.2606	0.8703
	16	rs28772958	28535305	G	0.3738	0.4069	A	1.266	0.2606	0.8703
	16	rs62034322	28535834	A	0.3224	0.3673	G	2.45	0.1175	0.8195
	16	rs62034323	28536473	T	0.3738	0.4069	C	1.266	0.2606	0.8703
	16	rs2106480	28537971	C	0.3738	0.4069	T	1.266	0.2606	0.8703
	16	rs62034325	28538640	G	0.3224	0.3648	A	2.185	0.1394	0.8286
	16	rs4788084	28539848	T	0.3738	0.4069	C	1.266	0.2606	0.8703
	16	rs12446550	28543381	A	0.3738	0.4069	G	1.266	0.2606	0.8703
	16	rs4788083	28545449	G	0.3738	0.4069	A	1.266	0.2606	0.8703
	16	rs3785354	28550667	T	0.3084	0.3495	C	2.097	0.1476	0.83
	16	rs1074631	28554108	A	0.3084	0.3482	G	1.971	0.1603	0.8347
	16	rs4787457	28555400	G	0.3084	0.3495	A	2.097	0.1476	0.83
	16	rs9926245	28555706	A	0.3738	0.4056	T	1.171	0.2792	0.8749
	16	rs4788081	28556147	C	0.3084	0.3482	T	1.971	0.1603	0.8347
	16	rs4788080	28558081	T	0.3084	0.3495	C	2.097	0.1476	0.83
	16	rs4788079	28559363	A	0.3084	0.3495	C	2.097	0.1476	0.83
	16	rs4787456	28559573	T	0.3084	0.3495	C	2.097	0.1476	0.83
	16	rs4788078	28559981	A	0.3084	0.3495	G	2.097	0.1476	0.83
	16	rs13331170	28561982	C	0.3738	0.4056	T	1.171	0.2792	0.8749
	16	rs62034350	28562256	G	0.3084	0.3495	A	2.097	0.1476	0.83
	16	rs62034351	28565489	A	0.3084	0.3482	G	1.971	0.1603	0.8347
	16	rs7191618	28565667	G	0.3738	0.4056	C	1.171	0.2792	0.8749
	16	rs7187604	28565953	G	0.3084	0.3495	A	2.097	0.1476	0.83
	16	rs3859172	28566158	T	0.3738	0.4056	G	1.171	0.2792	0.8749
	16	rs4788077	28569764	C	0.3084	0.3495	G	2.097	0.1476	0.83
	16	rs4788076	28570005	T	0.3084	0.3508	C	2.227	0.1356	0.8254
	16	rs56272201	28580685	G	0.3084	0.3495	A	2.097	0.1476	0.83
	16	rs56396270	28580829	T	0.3084	0.3508	C	2.227	0.1356	0.8254
	16	rs62034355	28581038	C	0.3084	0.3495	G	2.097	0.1476	0.83
	16	rs12447461	28582941	A	0.3224	0.3673	C	2.45	0.1175	0.8195
	16	rs112191041	28583362	G	0.3224	0.3673	A	2.45	0.1175	0.8195
	16	rs111693583	28583610	T	0.3224	0.3673	C	2.45	0.1175	0.8195
	16	rs11074911	28583865	T	0.3224	0.3673	C	2.45	0.1175	0.8195
	16	rs56209193	28585636	T	0.3224	0.3673	C	2.45	0.1175	0.8195
	16	rs7193402	28586127	C	0.3084	0.3508	T	2.227	0.1356	0.8254
	16	rs7186573	28587389	C	0.3224	0.3673	T	2.45	0.1175	0.8195
	16	rs62034358	28587597	T	0.3084	0.3508	G	2.227	0.1356	0.8254
	16	rs12445823	28588049	C	0.3084	0.3508	A	2.227	0.1356	0.8254
	16	rs12445744	28588395	C	0.3084	0.3508	A	2.227	0.1356	0.8254
	16	rs12448429	28588443	T	0.3224	0.3673	C	2.45	0.1175	0.8195
	16	rs4787455	28589455	A	0.3084	0.3508	G	2.227	0.1356	0.8254
	16	rs112047757	28590862	T	0.3224	0.3673	C	2.45	0.1175	0.8195
	16	rs112831778	28590989	T	0.3084	0.3495	C	2.097	0.1476	0.83
	16	rs17707300	28593347	C	0.3224	0.3673	T	2.45	0.1175	0.8195
	16	rs4788074	28593597	A	0.3084	0.3508	G	2.227	0.1356	0.8254
	16	rs4788073	28594549	G	0.3224	0.3673	A	2.45	0.1175	0.8195
	16	rs17640009	28595700	G	0.3224	0.3673	A	2.45	0.1175	0.8195
	16	rs75539558	28595810	G	0.3224	0.3673	C	2.45	0.1175	0.8195
	16	rs55792032	28599411	G	0.3224	0.3673	A	2.45	0.1175	0.8195
	16	rs62034359	28600091	T	0.3084	0.3508	C	2.227	0.1356	0.8254
	16	rs2077031	28603168	A	0.3084	0.3508	T	2.227	0.1356	0.8254
	16	rs762634	28603335	C	0.3084	0.3495	T	2.097	0.1476	0.83
	16	rs710410	28603342	G	0.3084	0.3495	A	2.097	0.1476	0.83
	16	rs1059491	28603655	G	0.3084	0.3508	T	2.227	0.1356	0.8254
	16	rs62031560	28605915	A	0.3224	0.3673	T	2.45	0.1175	0.8195
	16	rs113208333	28606160	T	0.3224	0.3673	G	2.45	0.1175	0.8195
	16	rs4149406	28607070	G	0.3224	0.3673	A	2.45	0.1175	0.8195
	16	rs743590	28608230	A	0.3224	0.3673	G	2.45	0.1175	0.8195
	16	rs762633	28608341	C	0.3084	0.3508	T	2.227	0.1356	0.8254
	16	rs35175818	28608746	C	0.3084	0.3508	A	2.227	0.1356	0.8254
	16	rs4149398	28608938	G	0.3084	0.3508	C	2.227	0.1356	0.8254
	16	rs62031562	28609329	T	0.3084	0.3533	A	2.497	0.1141	0.8162
	16	rs11074907	28613965	G	0.3551	0.389	A	1.354	0.2446	0.8649
	16	rs7191548	28614734	C	0.3528	0.3878	T	1.442	0.2298	0.8607
	16	rs6498091	28616259	G	0.3505	0.3878	T	1.643	0.1999	0.852
	16	rs4788070	28616399	A	0.3505	0.389	G	1.756	0.1851	0.8474
	16	rs4788069	28616665	A	0.3505	0.3878	C	1.643	0.1999	0.852
	16	rs4788068	28616723	T	0.3505	0.3878	C	1.643	0.1999	0.852
	16	rs1042157	28617057	A	0.3505	0.3878	G	1.643	0.1999	0.852
	16	rs4149394	28617574	T	0.3481	0.3852	C	1.629	0.2019	0.8524
	16	rs79039694	28617795	A	0.3481	0.3878	G	1.857	0.173	0.8432
	16	rs4149392	28617813	G	0.3481	0.3865	A	1.741	0.187	0.8478
	16	rs75301646	28617885	A	0.3341	0.3661	G	1.235	0.2664	0.8689
	16	rs116840534	28617890	G	0.3341	0.3661	A	1.235	0.2664	0.8689
	16	rs111384198	28617934	C	0.3154	0.3508	T	1.545	0.2139	0.8528
	16	rs4149391	28617971	C	0.2617	0.3125	T	3.441	0.0636	0.7797
	16	rs41278158	28617993	A	0.2196	0.2832	C	5.799	0.01604	0.7125
	16	rs34954534	28618018	T	0.06308	0.07015	C	0.2193	0.6396	0.8925
	16	rs4149388	28618047	T	0.08645	0.1008	A	0.6557	0.4181	0.8445
	16	rs74752114	28618068	A	0.264	0.3163	G	3.622	0.05702	0.7753
	16	rs9282862	28618237	C	0.3481	0.3865	T	1.741	0.187	0.8478
	16	rs3020804	28618636	G	0.3505	0.3865	A	1.534	0.2155	0.8565
	16	rs3020803	28618914	A	0.3458	0.3865	T	1.961	0.1614	0.8391
	16	rs2925629	28619076	C	0.3458	0.3865	T	1.961	0.1614	0.8391
	16	rs2925630	28619132	C	0.3481	0.3878	T	1.857	0.173	0.8432
	16	rs1126447	28619911	C	0.3505	0.3878	T	1.643	0.1999	0.852
	16	rs28729187	28626966	T	0.3294	0.3571	C	0.9373	0.333	0.8843
	16	rs28480369	28627004	T	0.3294	0.3571	C	0.9373	0.333	0.8843
	16	rs28676837	28627063	C	0.3294	0.3571	T	0.9373	0.333	0.8843
	16	rs6498089	28629300	C	0.3294	0.3571	T	0.9373	0.333	0.8843
	16	rs28410083	28631360	A	0.3248	0.3508	T	0.8321	0.3617	0.8902
	16	rs62031607	28631530	T	0.3224	0.3482	A	0.8213	0.3648	0.8907
	16	rs1968752	28631585	T	0.3224	0.3508	G	0.9895	0.3199	0.8808
	16	rs1968751	28631759	T	0.3248	0.3508	C	0.8321	0.3617	0.8902
	16	rs2411453	28632021	T	0.3528	0.389	G	1.548	0.2134	0.8561
	16	rs8049739	28632288	G	0.3248	0.3508	C	0.8321	0.3617	0.8902
	16	rs35626515	28649651	A	0.3598	0.3929	C	1.282	0.2576	0.8686
50	16	rs7202877	75247245	G	0.1051	0.09821	T	0.1467	0.7017	1.079
	16	rs8054218	75252161	G	0.1051	0.09821	A	0.1467	0.7017	1.079
	16	rs7185352	75300248	C	0.1051	0.09821	G	0.1467	0.7017	1.079
51	17	rs62062609	7631694	T	0.1145	0.1327	G	0.8284	0.3627	0.8453
	17	rs16956936	7633692	T	0.1145	0.1327	C	0.8284	0.3627	0.8453
	17	rs62062610	7633766	A	0.1145	0.1327	G	0.8284	0.3627	0.8453
	17	rs62062611	7634055	G	0.1145	0.1327	A	0.8284	0.3627	0.8453
	17	rs62062612	7635265	C	0.1145	0.1327	T	0.8284	0.3627	0.8453
	17	rs16956939	7635815	T	0.1145	0.1327	C	0.8284	0.3627	0.8453
	17	rs112008397	7636959	A	0.1145	0.1327	C	0.8284	0.3627	0.8453
	17	rs62062613	7642035	T	0.1192	0.1339	C	0.5385	0.463	0.8748
	17	rs56332843	7647537	A	0.1145	0.125	G	0.2872	0.592	0.905
	17	rs58657621	7655144	A	0.1145	0.1199	C	0.07792	0.7801	0.949
	17	rs62062616	7655975	T	0.1145	0.1199	C	0.07792	0.7801	0.949
	17	rs62062618	7658587	A	0.1145	0.1199	G	0.07792	0.7801	0.949
	17	rs62062623	7663917	G	0.1145	0.1199	A	0.07792	0.7801	0.949
52	17	rs9747973	37905107	T	0.4907	0.4936	C	0.009759	0.9213	0.9882
	17	rs2941522	37910368	T	0.4907	0.4923	C	0.003174	0.9551	0.9932
	17	rs907091	37921742	C	0.5047	0.5026	T	0.004986	0.9437	1.009
	17	rs2952140	37928059	T	0.4907	0.4962	C	0.03374	0.8543	0.9782
	17	rs2313430	37929816	C	0.4907	0.4962	T	0.03374	0.8543	0.9782
	17	rs10445308	37938047	T	0.4813	0.4732	C	0.07272	0.7874	1.033
	17	rs12942330	37939839	T	0.4813	0.4732	C	0.07272	0.7874	1.033
	17	rs2952144	37960017	T	0.4907	0.4962	C	0.03374	0.8543	0.9782
	17	rs4795395	37962987	A	0.4813	0.4732	T	0.07272	0.7874	1.033
	17	rs9909593	37970149	G	0.4813	0.4732	A	0.07272	0.7874	1.033
	17	rs9303277	37976469	C	0.4907	0.4962	T	0.03374	0.8543	0.9782
	17	rs12944882	37983492	T	0.4696	0.4783	C	0.08384	0.7722	0.9657
	17	rs3816470	37985801	A	0.4696	0.4783	G	0.08384	0.7722	0.9657
	17	rs35222145	38007321	G	0.479	0.4847	T	0.0363	0.8489	0.9773
	17	rs34073687	38007323	T	0.4836	0.4821	G	0.002501	0.9601	1.006
	17	rs1453559	38020419	T	0.493	0.4911	C	0.00408	0.9491	1.008
	17	rs4795397	38023745	G	0.4743	0.4745	A	4.039e-05	0.9949	0.9992
	17	rs11655198	38026169	T	0.5023	0.5038	C	0.002459	0.9605	0.9941
	17	rs11650661	38026286	T	0.5023	0.5038	A	0.002459	0.9605	0.9941
	17	rs11655292	38026361	G	0.5023	0.5038	C	0.002459	0.9605	0.9941
	17	rs11557467	38028634	T	0.5023	0.5038	G	0.002459	0.9605	0.9941
	17	rs12936231	38029120	C	0.493	0.4923	G	0.000459	0.9829	1.003
	17	rs9903250	38031030	A	0.5023	0.5038	G	0.002459	0.9605	0.9941
	17	rs11658278	38031164	C	0.5023	0.5038	T	0.002459	0.9605	0.9941
	17	rs9908132	38042777	A	0.5023	0.5038	T	0.002459	0.9605	0.9941
	17	rs9901146	38043343	A	0.5023	0.5038	G	0.002459	0.9605	0.9941
	17	rs12103884	38045725	T	0.5047	0.5038	C	0.0007933	0.9775	1.003
	17	rs9906951	38048244	C	0.5023	0.5051	T	0.008471	0.9267	0.989
	17	rs12950209	38049102	C	0.5023	0.5051	T	0.008471	0.9267	0.989
	17	rs12950743	38049233	C	0.5023	0.5051	T	0.008471	0.9267	0.989
	17	rs7359623	38049589	T	0.5023	0.5051	C	0.008471	0.9267	0.989
	17	rs8067378	38051348	A	0.493	0.4911	G	0.00408	0.9491	1.008
	17	rs12453507	38053207	G	0.4883	0.4974	C	0.09235	0.7612	0.9641
	17	rs11651596	38056116	C	0.4603	0.4579	T	0.006275	0.9369	1.01
	17	rs12949100	38057189	A	0.4509	0.4579	G	0.05429	0.8158	0.9723
	17	rs8069176	38057197	A	0.4509	0.4579	G	0.05429	0.8158	0.9723
	17	rs4795399	38061439	C	0.4486	0.4579	T	0.09679	0.7557	0.9631
	17	rs2305480	38062196	A	0.4486	0.4579	G	0.09679	0.7557	0.9631
	17	rs2305479	38062217	T	0.4766	0.4974	C	0.4799	0.4885	0.9201
	17	rs11078926	38062976	A	0.4486	0.4579	G	0.09679	0.7557	0.9631
	17	rs883770	38063381	T	0.4766	0.4974	C	0.4799	0.4885	0.9201
	17	rs62067034	38063738	T	0.4766	0.4974	C	0.4799	0.4885	0.9201
	17	rs36000226	38063929	C	0.4766	0.4974	T	0.4799	0.4885	0.9201
	17	rs11078927	38064405	T	0.4486	0.4579	C	0.09679	0.7557	0.9631
	17	rs11078928	38064469	C	0.4486	0.4579	T	0.09679	0.7557	0.9631
	17	rs2290400	38066240	C	0.4813	0.5038	T	0.5616	0.4536	0.9138
	17	rs1008723	38066267	T	0.4766	0.5	G	0.6047	0.4368	0.9107
	17	rs56380902	38066372	C	0.4813	0.5038	T	0.5616	0.4536	0.9138
	17	rs4795400	38067020	T	0.4486	0.4605	C	0.157	0.6919	0.9533
	17	rs4795401	38067533	G	0.4766	0.5	A	0.6047	0.4368	0.9107
	17	rs869402	38068043	T	0.493	0.5051	C	0.1624	0.6869	0.9527
	17	rs1011082	38068514	T	0.493	0.5038	C	0.13	0.7184	0.9576
	17	rs921650	38069076	G	0.493	0.5038	A	0.13	0.7184	0.9576
	17	rs921649	38069274	C	0.493	0.5038	T	0.13	0.7184	0.9576
	17	rs7216389	38069949	C	0.493	0.5038	T	0.13	0.7184	0.9576
	17	rs7216558	38070071	T	0.5023	0.4923	C	0.1105	0.7396	1.041
	17	rs7221605	38070789	C	0.4743	0.4911	T	0.3118	0.5766	0.935
	17	rs1031458	38072173	G	0.4743	0.4911	T	0.3118	0.5766	0.935
	17	rs1031460	38072247	T	0.4743	0.4885	G	0.2242	0.6358	0.9446
	17	rs8065777	38072402	C	0.4743	0.4911	T	0.3118	0.5766	0.935
	17	rs9303280	38074031	T	0.4743	0.4911	C	0.3118	0.5766	0.935
	17	rs9303281	38074046	A	0.5023	0.4923	G	0.1105	0.7396	1.041
	17	rs7219923	38074518	T	0.5023	0.4923	C	0.1105	0.7396	1.041
	17	rs7224129	38075426	A	0.5023	0.4923	G	0.1105	0.7396	1.041
	17	rs8074437	38076137	G	0.5023	0.4923	T	0.1105	0.7396	1.041
	17	rs12603332	38082807	T	0.4813	0.4885	C	0.05765	0.8103	0.9715
53	17	rs1724390	43663247	A	0.2173	0.2309	C	0.2917	0.5891	0.9249
	17	rs413519	43685826	G	0.2173	0.2309	A	0.2917	0.5891	0.9249
	17	rs382362	43691377	C	0.2103	0.2181	T	0.1005	0.7512	0.9545
	17	rs611351	43692935	G	0.2173	0.2309	A	0.2917	0.5891	0.9249
	17	rs383241	43705356	A	0.2173	0.2309	G	0.2917	0.5891	0.9249
	17	rs365825	43705601	G	0.2173	0.2309	A	0.2917	0.5891	0.9249
	17	rs393838	43705756	C	0.2173	0.2309	G	0.2917	0.5891	0.9249
	17	rs444071	43707951	T	0.2173	0.2309	C	0.2917	0.5891	0.9249
	17	rs396593	43707955	A	0.2173	0.2309	C	0.2917	0.5891	0.9249
	17	rs16940633	43710371	A	0.2173	0.2309	G	0.2917	0.5891	0.9249
	17	rs17686610	43710384	C	0.2173	0.2309	A	0.2917	0.5891	0.9249
	17	rs2942170	43711312	T	0.2173	0.2309	C	0.2917	0.5891	0.9249
	17	rs2942169	43711539	C	0.2173	0.2309	G	0.2917	0.5891	0.9249
	17	rs2942167	43715018	C	0.2173	0.2309	T	0.2917	0.5891	0.9249
	17	rs2942166	43715427	C	0.2173	0.2309	T	0.2917	0.5891	0.9249
	17	rs2942165	43715619	C	0.2173	0.2309	G	0.2917	0.5891	0.9249
	17	rs117368197	43715924	G	0.2173	0.2309	A	0.2917	0.5891	0.9249
	17	rs413778	43716885	G	0.2173	0.2309	A	0.2917	0.5891	0.9249
	17	rs389217	43717131	T	0.2173	0.2309	C	0.2917	0.5891	0.9249
	17	rs389978	43717415	G	0.2173	0.2321	A	0.3482	0.5551	0.9183
	17	rs439558	43717803	C	0.2173	0.2309	T	0.2917	0.5891	0.9249
	17	rs434805	43718336	C	0.2173	0.2309	T	0.2917	0.5891	0.9249
	17	rs393152	43719143	G	0.2173	0.2309	A	0.2917	0.5891	0.9249
	17	rs3108317	43719870	A	0.2173	0.2309	G	0.2917	0.5891	0.9249
	17	rs2942164	43721283	C	0.2173	0.2309	G	0.2917	0.5891	0.9249
	17	rs1706748	43722509	G	0.2173	0.2309	C	0.2917	0.5891	0.9249
	17	rs413917	43723189	A	0.2173	0.2309	G	0.2917	0.5891	0.9249
	17	rs3418	43723462	T	0.2173	0.2309	C	0.2917	0.5891	0.9249
	17	rs393675	43723605	C	0.2173	0.2309	T	0.2917	0.5891	0.9249
	17	rs448830	43725212	A	0.2173	0.2309	G	0.2917	0.5891	0.9249
	17	rs434428	43725684	A	0.2173	0.2309	G	0.2917	0.5891	0.9249
	17	rs434598	43725762	A	0.2173	0.2309	G	0.2917	0.5891	0.9249
	17	rs434971	43725992	A	0.2173	0.2309	G	0.2917	0.5891	0.9249
	17	rs385691	43726125	C	0.2173	0.2309	A	0.2917	0.5891	0.9249
	17	rs439945	43726659	A	0.257	0.2628	C	0.04742	0.8276	0.9706
	17	rs424243	43727887	T	0.2173	0.2309	A	0.2917	0.5891	0.9249
	17	rs422112	43728137	A	0.2173	0.2309	G	0.2917	0.5891	0.9249
	17	rs417968	43728376	G	0.257	0.2628	A	0.04742	0.8276	0.9706
	17	rs241033	43733983	A	0.2173	0.2309	G	0.2917	0.5891	0.9249
	17	rs241032	43734145	C	0.2173	0.2309	T	0.2917	0.5891	0.9249
	17	rs241028	43735276	T	0.2173	0.2309	C	0.2917	0.5891	0.9249
	17	rs241021	43738627	G	0.2173	0.2309	T	0.2917	0.5891	0.9249
	17	rs241020	43738676	A	0.2173	0.2309	C	0.2917	0.5891	0.9249
	17	rs1724409	43740565	G	0.2523	0.2628	T	0.1566	0.6923	0.947
	17	rs62053939	43740856	T	0.2173	0.2309	C	0.2917	0.5891	0.9249
	17	rs111273167	43740967	T	0.2173	0.2309	C	0.2917	0.5891	0.9249
	17	rs62053940	43741028	G	0.2173	0.2309	A	0.2917	0.5891	0.9249
	17	rs17760577	43741452	T	0.2173	0.2309	C	0.2917	0.5891	0.9249
	17	rs17760631	43743045	C	0.2173	0.2309	T	0.2917	0.5891	0.9249
	17	rs1635298	43744344	T	0.2407	0.25	A	0.1301	0.7183	0.9508
	17	rs17687462	43744990	T	0.2173	0.2309	C	0.2917	0.5891	0.9249
	17	rs17760733	43746276	T	0.2173	0.2309	G	0.2917	0.5891	0.9249
	17	rs79675109	43746418	A	0.2173	0.2309	T	0.2917	0.5891	0.9249
	17	rs17687504	43746721	G	0.2173	0.2309	A	0.2917	0.5891	0.9249
	17	rs62053945	43746839	C	0.2173	0.2309	T	0.2917	0.5891	0.9249
	17	rs1724407	43747615	C	0.2407	0.25	T	0.1301	0.7183	0.9508
	17	rs62053946	43747677	T	0.2173	0.2309	C	0.2917	0.5891	0.9249
	17	rs62053947	43747683	A	0.2173	0.2309	G	0.2917	0.5891	0.9249
	17	rs62053948	43748046	T	0.2173	0.2309	C	0.2917	0.5891	0.9249
	17	rs62053949	43748101	G	0.2173	0.2309	A	0.2917	0.5891	0.9249
	17	rs62053950	43748412	G	0.2173	0.2309	A	0.2917	0.5891	0.9249
	17	rs62053951	43749168	C	0.2173	0.2309	G	0.2917	0.5891	0.9249
	17	rs62053952	43749261	C	0.2173	0.2309	T	0.2917	0.5891	0.9249
	17	rs62053953	43749454	A	0.2173	0.2309	G	0.2917	0.5891	0.9249
	17	rs17687534	43749579	C	0.2173	0.2309	T	0.2917	0.5891	0.9249
	17	rs1631850	43749942	A	0.2407	0.25	G	0.1301	0.7183	0.9508
	17	rs62053954	43749949	A	0.2173	0.2309	G	0.2917	0.5891	0.9249
	17	rs62053955	43749980	C	0.2173	0.2309	T	0.2917	0.5891	0.9249
	17	rs17687571	43750010	A	0.2173	0.2309	G	0.2917	0.5891	0.9249
	17	rs17760817	43750137	C	0.2173	0.2309	G	0.2917	0.5891	0.9249
	17	rs1630095	43750172	G	0.2407	0.25	A	0.1301	0.7183	0.9508
	17	rs17687625	43750238	G	0.2173	0.2309	A	0.2917	0.5891	0.9249
	17	rs62053956	43750315	G	0.2173	0.2309	A	0.2917	0.5891	0.9249
	17	rs4792824	43750910	C	0.2407	0.25	T	0.1301	0.7183	0.9508
	17	rs62053957	43750939	C	0.2173	0.2309	T	0.2917	0.5891	0.9249
	17	rs1635291	43751913	G	0.2407	0.25	A	0.1301	0.7183	0.9508
	17	rs62055661	43752039	T	0.2173	0.2309	C	0.2917	0.5891	0.9249
	17	rs62055662	43752566	T	0.2173	0.2309	C	0.2917	0.5891	0.9249
	17	rs62055663	43753454	G	0.2173	0.2309	A	0.2917	0.5891	0.9249
	17	rs62055664	43753642	G	0.2173	0.2309	A	0.2917	0.5891	0.9249
	17	rs76717812	43754010	C	0.2173	0.2309	T	0.2917	0.5891	0.9249
	17	rs17687667	43754099	A	0.2173	0.2309	G	0.2917	0.5891	0.9249
	17	rs79073784	43754209	C	0.2173	0.2309	G	0.2917	0.5891	0.9249
	17	rs62055665	43754505	C	0.2173	0.2309	A	0.2917	0.5891	0.9249
	17	rs62055689	43754569	A	0.2173	0.2309	G	0.2917	0.5891	0.9249
	17	rs62055690	43754576	G	0.2173	0.2309	C	0.2917	0.5891	0.9249
	17	rs62055691	43754850	C	0.2173	0.2309	T	0.2917	0.5891	0.9249
	17	rs1724401	43755857	C	0.2407	0.25	A	0.1301	0.7183	0.9508
	17	rs1724400	43755871	A	0.2407	0.25	C	0.1301	0.7183	0.9508
	17	rs74398257	43756340	C	0.2173	0.2309	T	0.2917	0.5891	0.9249
	17	rs17687740	43756376	C	0.2173	0.2309	G	0.2917	0.5891	0.9249
	17	rs62055693	43756910	C	0.2173	0.2309	T	0.2917	0.5891	0.9249
	17	rs1635288	43756969	A	0.2477	0.25	G	0.008078	0.9284	0.9876
	17	rs78487840	43757161	T	0.2173	0.2309	C	0.2917	0.5891	0.9249
	17	rs55974014	43757450	A	0.2173	0.2296	C	0.2401	0.6241	0.9315
	17	rs55651627	43758011	C	0.2173	0.2309	G	0.2917	0.5891	0.9249
	17	rs112155389	43758078	A	0.2173	0.2309	G	0.2917	0.5891	0.9249
	17	rs62055697	43758148	T	0.2173	0.2309	C	0.2917	0.5891	0.9249
	17	rs62055698	43758238	T	0.2173	0.2309	C	0.2917	0.5891	0.9249
	17	rs17761046	43758382	C	0.2173	0.2309	T	0.2917	0.5891	0.9249
	17	rs62055700	43758742	C	0.2173	0.2309	T	0.2917	0.5891	0.9249
	17	rs62055701	43758787	A	0.2173	0.2309	G	0.2917	0.5891	0.9249
	17	rs62055702	43758790	T	0.2173	0.2309	C	0.2917	0.5891	0.9249
	17	rs112431991	43758885	G	0.2173	0.2309	A	0.2917	0.5891	0.9249
	17	rs57222984	43758898	G	0.2407	0.25	A	0.1301	0.7183	0.9508
	17	rs17687838	43759048	C	0.2173	0.2309	T	0.2917	0.5891	0.9249
	17	rs76333921	43759426	T	0.2173	0.2309	C	0.2917	0.5891	0.9249
	17	rs76453925	43759431	T	0.2173	0.2309	C	0.2917	0.5891	0.9249
	17	rs17687849	43759719	G	0.2173	0.2309	A	0.2917	0.5891	0.9249
	17	rs56400821	43760080	A	0.2173	0.2296	C	0.2401	0.6241	0.9315
	17	rs112169475	43760192	G	0.2173	0.2309	A	0.2917	0.5891	0.9249
	17	rs113728380	43760199	T	0.2173	0.2309	C	0.2917	0.5891	0.9249
	17	rs17761100	43760389	G	0.2173	0.2309	A	0.2917	0.5891	0.9249
	17	rs17761124	43760516	T	0.2173	0.2309	A	0.2917	0.5891	0.9249
	17	rs62055704	43760577	A	0.2173	0.2309	G	0.2917	0.5891	0.9249
	17	rs62055705	43760599	C	0.2173	0.2309	A	0.2917	0.5891	0.9249
	17	rs62055706	43760685	C	0.2173	0.2309	T	0.2917	0.5891	0.9249
	17	rs75115093	43761381	G	0.2173	0.2309	A	0.2917	0.5891	0.9249
	17	rs62055707	43761482	C	0.2173	0.2309	T	0.2917	0.5891	0.9249
	17	rs16941035	43761519	G	0.2407	0.25	T	0.1301	0.7183	0.9508
	17	rs16941038	43761565	C	0.2407	0.25	T	0.1301	0.7183	0.9508
	17	rs62055708	43761974	A	0.2173	0.2309	C	0.2917	0.5891	0.9249
	17	rs17761207	43762255	C	0.2173	0.2309	T	0.2917	0.5891	0.9249
	17	rs62055709	43762429	T	0.2173	0.2309	C	0.2917	0.5891	0.9249
	17	rs62055711	43762554	G	0.2173	0.2309	A	0.2917	0.5891	0.9249
	17	rs17688002	43762594	T	0.2173	0.2309	A	0.2917	0.5891	0.9249
	17	rs17688032	43763202	A	0.2173	0.2309	G	0.2917	0.5891	0.9249
	17	rs17688056	43763241	T	0.2173	0.2309	C	0.2917	0.5891	0.9249
	17	rs17688068	43763935	G	0.2173	0.2309	A	0.2917	0.5891	0.9249
	17	rs77220413	43764378	A	0.2173	0.2309	G	0.2917	0.5891	0.9249
	17	rs62055712	43764565	G	0.2173	0.2309	A	0.2917	0.5891	0.9249
	17	rs62055713	43764685	T	0.2173	0.2309	C	0.2917	0.5891	0.9249
	17	rs62055714	43764796	T	0.2173	0.2309	G	0.2917	0.5891	0.9249
	17	rs62055715	43764847	A	0.2173	0.2309	G	0.2917	0.5891	0.9249
	17	rs17688090	43764987	A	0.2173	0.2309	G	0.2917	0.5891	0.9249
	17	rs17688126	43765080	G	0.2173	0.2309	A	0.2917	0.5891	0.9249
	17	rs77310586	43765381	C	0.2173	0.2309	G	0.2917	0.5891	0.9249
	17	rs17761387	43765450	A	0.2173	0.2309	G	0.2917	0.5891	0.9249
	17	rs62055716	43765778	T	0.2173	0.2309	C	0.2917	0.5891	0.9249
	17	rs6503443	43765881	C	0.2383	0.25	T	0.2038	0.6517	0.9387
	17	rs17688205	43766352	C	0.2173	0.2309	G	0.2917	0.5891	0.9249
	17	rs62055717	43766415	G	0.2173	0.2296	A	0.2401	0.6241	0.9315
	17	rs62055718	43766418	T	0.2173	0.2296	C	0.2401	0.6241	0.9315
	17	rs17688249	43766754	T	0.2173	0.2309	C	0.2917	0.5891	0.9249
	17	rs62055751	43767538	G	0.2173	0.2309	A	0.2917	0.5891	0.9249
	17	rs62055752	43767628	A	0.2173	0.2309	G	0.2917	0.5891	0.9249
	17	rs62055753	43767631	A	0.2173	0.2309	G	0.2917	0.5891	0.9249
	17	rs7215239	43767773	C	0.2383	0.25	T	0.2038	0.6517	0.9387
	17	rs17688296	43767815	T	0.2173	0.2309	C	0.2917	0.5891	0.9249
	17	rs62055754	43768230	G	0.2173	0.2309	C	0.2917	0.5891	0.9249
	17	rs78471340	43768346	A	0.2173	0.2309	G	0.2917	0.5891	0.9249
	17	rs78052495	43768347	T	0.2173	0.2309	C	0.2917	0.5891	0.9249
	17	rs56100013	43768467	T	0.2173	0.2309	C	0.2917	0.5891	0.9249
	17	rs55980621	43768496	T	0.2173	0.2309	C	0.2917	0.5891	0.9249
	17	rs55669046	43768501	T	0.2173	0.2309	C	0.2917	0.5891	0.9249
	17	rs56323832	43768633	A	0.2173	0.2309	G	0.2917	0.5891	0.9249
	17	rs55972157	43768703	T	0.2173	0.2309	C	0.2917	0.5891	0.9249
	17	rs56110538	43768727	A	0.2173	0.2309	G	0.2917	0.5891	0.9249
	17	rs17761581	43769088	C	0.2173	0.2309	T	0.2917	0.5891	0.9249
	17	rs55840731	43769277	G	0.2173	0.2309	C	0.2917	0.5891	0.9249
	17	rs56283089	43769321	C	0.2173	0.2309	A	0.2917	0.5891	0.9249
	17	rs56312737	43769516	A	0.2173	0.2309	C	0.2917	0.5891	0.9249
	17	rs74765707	43770416	C	0.2173	0.2309	T	0.2917	0.5891	0.9249
	17	rs62056861	43770443	C	0.2173	0.2309	T	0.2917	0.5891	0.9249
	17	rs62056862	43770525	T	0.2173	0.2309	C	0.2917	0.5891	0.9249
	17	rs62056863	43770595	G	0.2173	0.2309	A	0.2917	0.5891	0.9249
	17	rs7207373	43770712	T	0.2383	0.2487	C	0.1621	0.6873	0.9451
	17	rs62056864	43770995	A	0.2173	0.2309	G	0.2917	0.5891	0.9249
	17	rs62056865	43771193	C	0.2173	0.2309	T	0.2917	0.5891	0.9249
	17	rs62056866	43771493	A	0.2173	0.2309	G	0.2917	0.5891	0.9249
	17	rs62056867	43771627	G	0.2173	0.2309	A	0.2917	0.5891	0.9249
	17	rs56200760	43772018	T	0.2173	0.2309	G	0.2917	0.5891	0.9249
	17	rs17688391	43772109	A	0.2173	0.2309	C	0.2917	0.5891	0.9249
	17	rs17688410	43772251	T	0.2173	0.2309	C	0.2917	0.5891	0.9249
	17	rs55927630	43772407	T	0.2173	0.2309	C	0.2917	0.5891	0.9249
	17	rs17688434	43772540	A	0.2173	0.2309	G	0.2917	0.5891	0.9249
	17	rs17688452	43773085	A	0.2173	0.2309	G	0.2917	0.5891	0.9249
	17	rs10491144	43773124	C	0.2173	0.2309	A	0.2917	0.5891	0.9249
	17	rs10491143	43773248	T	0.2173	0.2309	A	0.2917	0.5891	0.9249
	17	rs62056869	43773447	C	0.2173	0.2309	T	0.2917	0.5891	0.9249
	17	rs17688511	43773607	G	0.2173	0.2309	T	0.2917	0.5891	0.9249
	17	rs62056870	43773784	A	0.2173	0.2309	C	0.2917	0.5891	0.9249
	17	rs17688534	43773877	T	0.2173	0.2309	A	0.2917	0.5891	0.9249
	17	rs17688558	43773943	G	0.2173	0.2309	A	0.2917	0.5891	0.9249
	17	rs56162163	43774497	T	0.2173	0.2309	A	0.2917	0.5891	0.9249
	17	rs56391096	43774845	T	0.2173	0.2309	C	0.2917	0.5891	0.9249
	17	rs17761838	43774959	C	0.2173	0.2309	T	0.2917	0.5891	0.9249
	17	rs62056872	43775015	C	0.2173	0.2309	T	0.2917	0.5891	0.9249
	17	rs12150141	43775145	A	0.2173	0.2309	G	0.2917	0.5891	0.9249
	17	rs12150608	43775402	C	0.2173	0.2309	T	0.2917	0.5891	0.9249
	17	rs12150610	43775479	C	0.2173	0.2309	T	0.2917	0.5891	0.9249
	17	rs12150547	43775546	G	0.2173	0.2309	A	0.2917	0.5891	0.9249
	17	rs17688682	43775929	G	0.2173	0.2309	C	0.2917	0.5891	0.9249
	17	rs12150454	43776061	T	0.2173	0.2309	C	0.2917	0.5891	0.9249
	17	rs12150091	43776242	G	0.2173	0.2309	A	0.2917	0.5891	0.9249
	17	rs12150464	43776371	T	0.2173	0.2309	C	0.2917	0.5891	0.9249
	17	rs12150435	43776391	C	0.2173	0.2309	G	0.2917	0.5891	0.9249
	17	rs76761706	43776741	C	0.2173	0.2309	T	0.2917	0.5891	0.9249
	17	rs17761985	43776787	T	0.2173	0.2309	C	0.2917	0.5891	0.9249
	17	rs62056873	43776945	C	0.2173	0.2309	T	0.2917	0.5891	0.9249
	17	rs17688767	43777542	G	0.2173	0.2309	A	0.2917	0.5891	0.9249
	17	rs62056874	43777578	T	0.2173	0.2309	C	0.2917	0.5891	0.9249
	17	rs17688773	43777710	C	0.2173	0.2309	T	0.2917	0.5891	0.9249
	17	rs62056875	43778003	A	0.2173	0.2309	T	0.2917	0.5891	0.9249
	17	rs17688875	43778406	G	0.2173	0.2309	A	0.2917	0.5891	0.9249
	17	rs17762165	43778602	T	0.2173	0.2309	C	0.2917	0.5891	0.9249
	17	rs17688916	43778680	A	0.2103	0.2181	T	0.1005	0.7512	0.9545
	17	rs62056876	43778752	T	0.2173	0.2309	C	0.2917	0.5891	0.9249
	17	rs62056877	43778828	G	0.2196	0.2309	T	0.1994	0.6552	0.9376
	17	rs17688922	43779351	A	0.2173	0.2309	G	0.2917	0.5891	0.9249
	17	rs17688944	43779419	A	0.2173	0.2309	T	0.2917	0.5891	0.9249
	17	rs62056878	43780561	T	0.2173	0.2309	C	0.2917	0.5891	0.9249
	17	rs17762308	43780948	C	0.2173	0.2309	T	0.2917	0.5891	0.9249
	17	rs62056879	43781426	C	0.2173	0.2309	T	0.2917	0.5891	0.9249
	17	rs79892630	43781505	T	0.2173	0.2309	C	0.2917	0.5891	0.9249
	17	rs17762361	43781778	G	0.2173	0.2309	A	0.2917	0.5891	0.9249
	17	rs62056880	43782304	C	0.2173	0.2309	T	0.2917	0.5891	0.9249
	17	rs62056881	43782455	T	0.2173	0.2309	G	0.2917	0.5891	0.9249
	17	rs17689104	43782492	G	0.2173	0.2309	A	0.2917	0.5891	0.9249
	17	rs17689116	43782558	C	0.2173	0.2309	T	0.2917	0.5891	0.9249
	17	rs62056905	43782693	G	0.2173	0.2309	A	0.2917	0.5891	0.9249
	17	rs62056906	43782708	C	0.2173	0.2309	T	0.2917	0.5891	0.9249
	17	rs62056909	43783803	G	0.2173	0.2309	A	0.2917	0.5891	0.9249
	17	rs62056910	43784222	C	0.2173	0.2309	T	0.2917	0.5891	0.9249
	17	rs62056911	43784624	C	0.2173	0.2309	T	0.2917	0.5891	0.9249
	17	rs78568882	43784935	G	0.2173	0.2296	C	0.2401	0.6241	0.9315
	17	rs62056912	43784948	T	0.2173	0.2309	G	0.2917	0.5891	0.9249
	17	rs62056913	43784994	T	0.2173	0.2296	C	0.2401	0.6241	0.9315
	17	rs61667602	43785349	C	0.2173	0.2309	T	0.2917	0.5891	0.9249
	17	rs62056915	43785627	T	0.2173	0.2309	A	0.2917	0.5891	0.9249
	17	rs17689218	43785808	C	0.2173	0.2309	T	0.2917	0.5891	0.9249
	17	rs62056916	43785938	T	0.2173	0.2309	C	0.2917	0.5891	0.9249
	17	rs62056917	43786013	T	0.2173	0.2309	G	0.2917	0.5891	0.9249
	17	rs62056918	43786676	G	0.2173	0.2309	T	0.2917	0.5891	0.9249
	17	rs62056919	43786698	T	0.2173	0.2309	C	0.2917	0.5891	0.9249
	17	rs17762535	43787130	C	0.2173	0.2309	T	0.2917	0.5891	0.9249
	17	rs62056920	43787226	A	0.2173	0.2309	G	0.2917	0.5891	0.9249
	17	rs62056921	43787306	C	0.2173	0.2309	T	0.2917	0.5891	0.9249
	17	rs62056922	43787563	G	0.2173	0.2309	C	0.2917	0.5891	0.9249
	17	rs56290582	43788371	T	0.2173	0.2309	C	0.2917	0.5891	0.9249
	17	rs56397077	43788419	A	0.2173	0.2309	C	0.2917	0.5891	0.9249
	17	rs62056925	43788649	C	0.2173	0.2309	T	0.2917	0.5891	0.9249
	17	rs62056926	43788666	G	0.2173	0.2309	C	0.2917	0.5891	0.9249
	17	rs62056927	43788767	A	0.2173	0.2309	G	0.2917	0.5891	0.9249
	17	rs62056928	43788782	T	0.2173	0.2309	C	0.2917	0.5891	0.9249
	17	rs62056929	43789144	A	0.2173	0.2309	G	0.2917	0.5891	0.9249
	17	rs62056930	43789640	C	0.2196	0.2309	A	0.1994	0.6552	0.9376
	17	rs62056931	43789698	A	0.215	0.2283	G	0.2848	0.5936	0.9254
	17	rs62056932	43789971	C	0.2173	0.2283	G	0.1934	0.6601	0.9383
	17	rs62056933	43789978	A	0.2173	0.2283	G	0.1934	0.6601	0.9383
	17	rs62056934	43790005	G	0.2173	0.2309	A	0.2917	0.5891	0.9249
	17	rs79322350	43790401	G	0.2173	0.2309	A	0.2917	0.5891	0.9249
	17	rs62056935	43790446	G	0.2173	0.2309	A	0.2917	0.5891	0.9249
	17	rs75076131	43790649	A	0.2173	0.2309	C	0.2917	0.5891	0.9249
	17	rs62056936	43790911	T	0.2173	0.2309	A	0.2917	0.5891	0.9249
	17	rs62056937	43791181	C	0.2173	0.2309	A	0.2917	0.5891	0.9249
	17	rs62056939	43791332	C	0.2173	0.2309	T	0.2917	0.5891	0.9249
	17	rs62056940	43791344	A	0.2173	0.2309	T	0.2917	0.5891	0.9249
	17	rs77387379	43791429	A	0.2173	0.2309	G	0.2917	0.5891	0.9249
	17	rs75990322	43791468	C	0.2173	0.2309	T	0.2917	0.5891	0.9249
	17	rs113661667	43791610	C	0.2173	0.2309	T	0.2917	0.5891	0.9249
	17	rs74579538	43791652	A	0.2173	0.2309	G	0.2917	0.5891	0.9249
	17	rs55973918	43792252	A	0.2173	0.2309	C	0.2917	0.5891	0.9249
	17	rs56220242	43792326	T	0.2173	0.2309	C	0.2917	0.5891	0.9249
	17	rs56160448	43792358	G	0.2173	0.2309	A	0.2917	0.5891	0.9249
	17	rs56167560	43792411	G	0.215	0.2309	A	0.4018	0.5262	0.9122
	17	rs55849973	43792418	C	0.215	0.2309	T	0.4018	0.5262	0.9122
	17	rs1880749	43792586	C	0.2173	0.2309	A	0.2917	0.5891	0.9249
	17	rs7502718	43793651	A	0.2196	0.2309	G	0.1994	0.6552	0.9376
	17	rs7502937	43793665	G	0.2196	0.2309	A	0.1994	0.6552	0.9376
	17	rs4609898	43794182	A	0.2196	0.2309	G	0.1994	0.6552	0.9376
	17	rs4605208	43794209	C	0.2196	0.2309	G	0.1994	0.6552	0.9376
	17	rs75310534	43794286	T	0.2196	0.2309	C	0.1994	0.6552	0.9376
	17	rs76007856	43795238	A	0.2173	0.2309	G	0.2917	0.5891	0.9249
	17	rs111415173	43795573	T	0.2173	0.2309	C	0.2917	0.5891	0.9249
	17	rs113991678	43795634	T	0.2173	0.2309	C	0.2917	0.5891	0.9249
	17	rs112995313	43795768	C	0.2173	0.2309	T	0.2917	0.5891	0.9249
	17	rs56167344	43797087	T	0.2173	0.2309	A	0.2917	0.5891	0.9249
	17	rs56046792	43797246	T	0.2173	0.2309	C	0.2917	0.5891	0.9249
	17	rs56323722	43798015	C	0.2173	0.2309	A	0.2917	0.5891	0.9249
	17	rs55989971	43798160	A	0.2173	0.2309	G	0.2917	0.5891	0.9249
	17	rs62056946	43798401	A	0.2173	0.2309	G	0.2917	0.5891	0.9249
	17	rs75403953	43798546	G	0.2173	0.2309	A	0.2917	0.5891	0.9249
	17	rs55838058	43798902	T	0.2173	0.2309	C	0.2917	0.5891	0.9249
	17	rs56062621	43798903	G	0.2173	0.2309	A	0.2917	0.5891	0.9249
	17	rs55962674	43799033	T	0.2173	0.2309	C	0.2917	0.5891	0.9249
	17	rs55896111	43799048	A	0.2173	0.2309	G	0.2917	0.5891	0.9249
	17	rs55787734	43799052	G	0.2173	0.2309	A	0.2917	0.5891	0.9249
	17	rs55653963	43799509	C	0.2173	0.2309	A	0.2917	0.5891	0.9249
	17	rs62054378	43799667	A	0.2173	0.2309	C	0.2917	0.5891	0.9249
	17	rs77819001	43799804	A	0.2173	0.2309	C	0.2917	0.5891	0.9249
	17	rs76667867	43799810	C	0.2173	0.2309	G	0.2917	0.5891	0.9249
	17	rs17563433	43800351	C	0.2173	0.2309	A	0.2917	0.5891	0.9249
	17	rs77370070	43800404	G	0.2173	0.2309	T	0.2917	0.5891	0.9249
	17	rs62054380	43800987	A	0.2173	0.2309	C	0.2917	0.5891	0.9249
	17	rs112570965	43801092	C	0.2173	0.2309	T	0.2917	0.5891	0.9249
	17	rs62054381	43801185	G	0.2173	0.2309	A	0.2917	0.5891	0.9249
	17	rs17649019	43801593	A	0.2173	0.2309	G	0.2917	0.5891	0.9249
	17	rs17563501	43801695	T	0.2173	0.2309	C	0.2917	0.5891	0.9249
	17	rs62054382	43802525	T	0.2173	0.2309	C	0.2917	0.5891	0.9249
	17	rs62054383	43802907	C	0.2173	0.2309	T	0.2917	0.5891	0.9249
	17	rs10514879	43802971	T	0.2173	0.2309	C	0.2917	0.5891	0.9249
	17	rs56280222	43803788	C	0.2173	0.2309	T	0.2917	0.5891	0.9249
	17	rs62054384	43804306	C	0.2173	0.2309	T	0.2917	0.5891	0.9249
	17	rs9897399	43804317	A	0.2173	0.2309	G	0.2917	0.5891	0.9249
	17	rs56205560	43804389	A	0.2173	0.2309	T	0.2917	0.5891	0.9249
	17	rs56380663	43804619	T	0.2173	0.2309	C	0.2917	0.5891	0.9249
	17	rs62054387	43805525	C	0.2173	0.2309	A	0.2917	0.5891	0.9249
	17	rs62054388	43805590	T	0.2173	0.2309	C	0.2917	0.5891	0.9249
	17	rs4401083	43806015	A	0.2173	0.2309	G	0.2917	0.5891	0.9249
	17	rs4609899	43807113	T	0.2173	0.2309	C	0.2917	0.5891	0.9249
	17	rs4471726	43807134	C	0.2173	0.2309	T	0.2917	0.5891	0.9249
	17	rs79226879	43807485	C	0.2173	0.2309	T	0.2917	0.5891	0.9249
	17	rs17563599	43807955	C	0.2173	0.2309	A	0.2917	0.5891	0.9249
	17	rs17649138	43808067	A	0.2173	0.2309	G	0.2917	0.5891	0.9249
	17	rs62054389	43808321	A	0.2173	0.2309	G	0.2917	0.5891	0.9249
	17	rs62054390	43808443	C	0.2173	0.2309	A	0.2917	0.5891	0.9249
	17	rs55947210	43808763	G	0.2173	0.2309	A	0.2917	0.5891	0.9249
	17	rs62054392	43808945	T	0.2173	0.2309	C	0.2917	0.5891	0.9249
	17	rs4390635	43809016	T	0.2173	0.2309	C	0.2917	0.5891	0.9249
	17	rs62054393	43809264	G	0.2173	0.2309	T	0.2917	0.5891	0.9249
	17	rs75986348	43809328	G	0.2173	0.2309	A	0.2917	0.5891	0.9249
	17	rs17649162	43810371	C	0.2173	0.2309	G	0.2917	0.5891	0.9249
	17	rs62054394	43810608	A	0.2173	0.2309	T	0.2917	0.5891	0.9249
	17	rs113790915	43810782	C	0.2173	0.2309	G	0.2917	0.5891	0.9249
	17	rs77807457	43810851	C	0.2173	0.2309	G	0.2917	0.5891	0.9249
	17	rs75022332	43810873	T	0.2173	0.2283	A	0.1934	0.6601	0.9383
	17	rs77804065	43810896	T	0.229	0.2372	C	0.1056	0.7452	0.9548
	17	rs77301847	43810902	G	0.2173	0.2283	A	0.1934	0.6601	0.9383
	17	rs62054395	43811060	G	0.2173	0.2309	T	0.2917	0.5891	0.9249
	17	rs17563683	43811072	G	0.2173	0.2309	A	0.2917	0.5891	0.9249
	17	rs62054396	43811510	C	0.2173	0.2309	T	0.2917	0.5891	0.9249
	17	rs17563718	43811673	T	0.2173	0.2309	C	0.2917	0.5891	0.9249
	17	rs62054397	43811792	T	0.2173	0.2309	C	0.2917	0.5891	0.9249
	17	rs4569335	43811950	C	0.2173	0.2309	A	0.2917	0.5891	0.9249
	17	rs1526127	43812398	G	0.2173	0.2309	C	0.2917	0.5891	0.9249
	17	rs62054398	43812599	G	0.2173	0.2309	A	0.2917	0.5891	0.9249
	17	rs62054399	43812624	A	0.2173	0.2309	G	0.2917	0.5891	0.9249
	17	rs62054400	43812649	C	0.2173	0.2309	T	0.2917	0.5891	0.9249
	17	rs62054411	43812684	G	0.2173	0.2309	A	0.2917	0.5891	0.9249
	17	rs62054412	43813002	A	0.2173	0.2309	G	0.2917	0.5891	0.9249
	17	rs17563787	43813252	G	0.2173	0.2309	C	0.2917	0.5891	0.9249
	17	rs62054413	43813370	C	0.2173	0.2309	G	0.2917	0.5891	0.9249
	17	rs62054414	43813415	A	0.2173	0.2309	G	0.2917	0.5891	0.9249
	17	rs76421814	43814427	C	0.2173	0.2309	T	0.2917	0.5891	0.9249
	17	rs56006248	43815141	G	0.2173	0.2309	A	0.2917	0.5891	0.9249
	17	rs56298110	43815336	G	0.2173	0.2309	A	0.2917	0.5891	0.9249
	17	rs62054417	43815859	C	0.2173	0.2309	A	0.2917	0.5891	0.9249
	17	rs78440279	43816052	T	0.2173	0.2309	C	0.2917	0.5891	0.9249
	17	rs75500942	43816106	A	0.2173	0.2309	C	0.2917	0.5891	0.9249
	17	rs62054418	43816306	A	0.2173	0.2309	G	0.2917	0.5891	0.9249
	17	rs62054419	43816605	C	0.2173	0.2309	A	0.2917	0.5891	0.9249
	17	rs62054420	43816655	G	0.2173	0.2309	C	0.2917	0.5891	0.9249
	17	rs62054421	43816657	A	0.2173	0.2309	G	0.2917	0.5891	0.9249
	17	rs17563800	43817459	T	0.2173	0.2309	C	0.2917	0.5891	0.9249
	17	rs56295996	43817557	T	0.2173	0.2309	C	0.2917	0.5891	0.9249
	17	rs56384960	43817608	A	0.2173	0.2309	G	0.2917	0.5891	0.9249
	17	rs56178230	43817832	A	0.2173	0.2309	G	0.2917	0.5891	0.9249
	17	rs80157557	43817898	A	0.2173	0.2309	G	0.2917	0.5891	0.9249
	17	rs76728632	43818160	C	0.2173	0.2309	A	0.2917	0.5891	0.9249
	17	rs17563827	43818222	A	0.2173	0.2309	C	0.2917	0.5891	0.9249
	17	rs80072429	43818611	A	0.2173	0.2309	G	0.2917	0.5891	0.9249
	17	rs77114624	43818657	C	0.2173	0.2309	T	0.2917	0.5891	0.9249
	17	rs76311426	43818690	T	0.2173	0.2309	G	0.2917	0.5891	0.9249
	17	rs17563861	43818906	G	0.2173	0.2309	A	0.2917	0.5891	0.9249
	17	rs17563889	43818946	T	0.2173	0.2309	A	0.2917	0.5891	0.9249
	17	rs62054424	43819384	A	0.2173	0.2309	G	0.2917	0.5891	0.9249
	17	rs17563923	43819450	A	0.2173	0.2309	G	0.2917	0.5891	0.9249
	17	rs62054425	43819480	T	0.2173	0.2309	C	0.2917	0.5891	0.9249
	17	rs62054426	43820741	T	0.2173	0.2309	A	0.2917	0.5891	0.9249
	17	rs62054427	43821062	G	0.2173	0.2309	A	0.2917	0.5891	0.9249
	17	rs74464991	43821685	A	0.2173	0.2309	C	0.2917	0.5891	0.9249
	17	rs62054428	43822511	A	0.2173	0.2309	G	0.2917	0.5891	0.9249
	17	rs62054429	43823125	A	0.2173	0.2309	G	0.2917	0.5891	0.9249
	17	rs76171147	43823229	C	0.2173	0.2309	T	0.2917	0.5891	0.9249
	17	rs75643244	43823326	G	0.2173	0.2309	A	0.2917	0.5891	0.9249
	17	rs62054431	43823880	T	0.2173	0.2309	C	0.2917	0.5891	0.9249
	17	rs62054432	43823889	A	0.2173	0.2309	C	0.2917	0.5891	0.9249
	17	rs111497072	43824201	A	0.2173	0.2309	G	0.2917	0.5891	0.9249
	17	rs62054433	43824348	C	0.2173	0.2309	T	0.2917	0.5891	0.9249
	17	rs62054434	43824382	G	0.2173	0.2309	T	0.2917	0.5891	0.9249
	17	rs12150683	43824848	G	0.2173	0.2309	A	0.2917	0.5891	0.9249
	17	rs12150332	43824908	T	0.2173	0.2309	C	0.2917	0.5891	0.9249
	17	rs62054435	43825339	G	0.2173	0.2309	C	0.2917	0.5891	0.9249
	17	rs75715199	43825478	A	0.2173	0.2309	G	0.2917	0.5891	0.9249
	17	rs62054436	43825568	T	0.2173	0.2296	C	0.2401	0.6241	0.9315
	17	rs62054437	43825576	C	0.2173	0.2296	T	0.2401	0.6241	0.9315
	17	rs62054438	43825711	C	0.2173	0.2309	A	0.2917	0.5891	0.9249
	17	rs62054439	43825725	T	0.2173	0.2309	G	0.2917	0.5891	0.9249
	17	rs17334797	43825912	G	0.2173	0.2309	A	0.2917	0.5891	0.9249
	17	rs12150658	43826305	A	0.2173	0.2309	G	0.2917	0.5891	0.9249
	17	rs12150363	43826351	G	0.2173	0.2309	A	0.2917	0.5891	0.9249
	17	rs12150672	43826637	A	0.2173	0.2309	G	0.2917	0.5891	0.9249
	17	rs17334894	43827209	A	0.2173	0.2309	G	0.2917	0.5891	0.9249
	17	rs17334923	43827244	T	0.2173	0.2309	C	0.2917	0.5891	0.9249
	17	rs62054440	43827391	C	0.2173	0.2309	G	0.2917	0.5891	0.9249
	17	rs12150451	43827431	G	0.2173	0.2309	A	0.2917	0.5891	0.9249
	17	rs12150048	43827471	C	0.2173	0.2309	G	0.2917	0.5891	0.9249
	17	rs12150455	43827508	G	0.2173	0.2309	A	0.2917	0.5891	0.9249
	17	rs12150604	43828221	A	0.2173	0.2309	T	0.2917	0.5891	0.9249
	17	rs17334944	43828617	A	0.2173	0.2309	G	0.2917	0.5891	0.9249
	17	rs17426064	43828698	T	0.2173	0.2309	C	0.2917	0.5891	0.9249
	17	rs79172804	43828764	A	0.1799	0.2054	G	1.136	0.2864	0.8489
	17	rs17426106	43828935	C	0.2173	0.2309	G	0.2917	0.5891	0.9249
	17	rs62054442	43829353	G	0.2173	0.2309	A	0.2917	0.5891	0.9249
	17	rs62055868	43830640	T	0.2173	0.2309	C	0.2917	0.5891	0.9249
	17	rs62055869	43830685	A	0.2173	0.2309	G	0.2917	0.5891	0.9249
	17	rs17426174	43830938	C	0.2173	0.2309	G	0.2917	0.5891	0.9249
	17	rs62055871	43831112	A	0.2173	0.2309	G	0.2917	0.5891	0.9249
	17	rs55645418	43832115	G	0.2173	0.2309	A	0.2917	0.5891	0.9249
	17	rs35631660	43832337	G	0.2173	0.2309	A	0.2917	0.5891	0.9249
	17	rs17426195	43832367	A	0.2173	0.2309	G	0.2917	0.5891	0.9249
	17	rs62055875	43832864	C	0.2173	0.2309	T	0.2917	0.5891	0.9249
	17	rs62055876	43832940	G	0.2173	0.2296	A	0.2401	0.6241	0.9315
	17	rs12943085	43834482	A	0.2173	0.2309	G	0.2917	0.5891	0.9249
	17	rs62055878	43835854	A	0.2173	0.2309	C	0.2917	0.5891	0.9249
	17	rs76669427	43836051	A	0.2173	0.2309	T	0.2917	0.5891	0.9249
	17	rs74514268	43836191	A	0.2173	0.2309	G	0.2917	0.5891	0.9249
	17	rs12948216	43836673	T	0.2173	0.2309	C	0.2917	0.5891	0.9249
	17	rs56013908	43836920	C	0.2173	0.2309	T	0.2917	0.5891	0.9249
	17	rs56168907	43837091	C	0.2173	0.2309	T	0.2917	0.5891	0.9249
	17	rs55747440	43837115	G	0.2173	0.2309	A	0.2917	0.5891	0.9249
	17	rs55801356	43837237	G	0.2173	0.2309	A	0.2917	0.5891	0.9249
	17	rs62055883	43837446	G	0.2173	0.2309	C	0.2917	0.5891	0.9249
	17	rs62055884	43837567	T	0.2173	0.2309	C	0.2917	0.5891	0.9249
	17	rs79882507	43837782	G	0.2173	0.2309	A	0.2917	0.5891	0.9249
	17	rs62055885	43838014	G	0.2173	0.2309	A	0.2917	0.5891	0.9249
	17	rs28439278	43838071	T	0.2173	0.2309	C	0.2917	0.5891	0.9249
	17	rs12150621	43838482	T	0.2173	0.2309	G	0.2917	0.5891	0.9249
	17	rs62055886	43838678	A	0.2173	0.2309	G	0.2917	0.5891	0.9249
	17	rs62055887	43838710	C	0.2173	0.2309	T	0.2917	0.5891	0.9249
	17	rs62055888	43838720	T	0.2173	0.2283	C	0.1934	0.6601	0.9383
	17	rs62055889	43838919	A	0.2173	0.2309	G	0.2917	0.5891	0.9249
	17	rs11079718	43839951	T	0.2173	0.2309	A	0.2917	0.5891	0.9249
	17	rs11079719	43840006	G	0.2173	0.2309	T	0.2917	0.5891	0.9249
	17	rs11079720	43840016	A	0.2173	0.2309	G	0.2917	0.5891	0.9249
	17	rs11079721	43840107	A	0.2126	0.2321	C	0.6049	0.4367	0.8932
	17	rs62055890	43840681	T	0.2173	0.2309	C	0.2917	0.5891	0.9249
	17	rs77849344	43840864	A	0.2173	0.2309	G	0.2917	0.5891	0.9249
	17	rs74918686	43840899	C	0.2173	0.2309	G	0.2917	0.5891	0.9249
	17	rs79545140	43840935	C	0.2173	0.2309	T	0.2917	0.5891	0.9249
	17	rs56369036	43841571	A	0.2173	0.2309	T	0.2917	0.5891	0.9249
	17	rs11079723	43841729	C	0.2173	0.2309	T	0.2917	0.5891	0.9249
	17	rs11079724	43841912	T	0.2173	0.2309	C	0.2917	0.5891	0.9249
	17	rs55707339	43842462	C	0.2173	0.2309	T	0.2917	0.5891	0.9249
	17	rs62055893	43842494	G	0.2173	0.2309	A	0.2917	0.5891	0.9249
	17	rs75257002	43843395	T	0.2173	0.2309	C	0.2917	0.5891	0.9249
	17	rs62055894	43843943	A	0.2173	0.2309	G	0.2917	0.5891	0.9249
	17	rs62055895	43844044	G	0.2173	0.2309	A	0.2917	0.5891	0.9249
	17	rs62055896	43844201	T	0.2173	0.2309	C	0.2917	0.5891	0.9249
	17	rs55725840	43844486	A	0.2173	0.2309	T	0.2917	0.5891	0.9249
	17	rs56194509	43844559	G	0.215	0.2296	T	0.3408	0.5593	0.9188
	17	rs55657917	43844560	G	0.215	0.2296	T	0.3408	0.5593	0.9188
	17	rs56082319	43844798	A	0.2173	0.2309	G	0.2917	0.5891	0.9249
	17	rs56109643	43844859	G	0.2173	0.2309	A	0.2917	0.5891	0.9249
	17	rs62055899	43844977	A	0.2173	0.2309	T	0.2917	0.5891	0.9249
	17	rs62055900	43845002	G	0.2173	0.2309	C	0.2917	0.5891	0.9249
	17	rs62055901	43845041	A	0.2173	0.2309	G	0.2917	0.5891	0.9249
	17	rs62055903	43846668	A	0.2173	0.2309	C	0.2917	0.5891	0.9249
	17	rs111374028	43846820	A	0.2173	0.2309	G	0.2917	0.5891	0.9249
	17	rs113934115	43847039	T	0.2173	0.2309	C	0.2917	0.5891	0.9249
	17	rs62055928	43847374	A	0.2173	0.2309	G	0.2917	0.5891	0.9249
	17	rs56268325	43847741	C	0.2173	0.2309	T	0.2917	0.5891	0.9249
	17	rs56070245	43847868	C	0.2173	0.2309	T	0.2917	0.5891	0.9249
	17	rs56387266	43847912	C	0.2173	0.2309	T	0.2917	0.5891	0.9249
	17	rs62055932	43848412	G	0.2173	0.2309	A	0.2917	0.5891	0.9249
	17	rs62055933	43848461	A	0.2173	0.2309	G	0.2917	0.5891	0.9249
	17	rs62055935	43848750	C	0.2173	0.2309	T	0.2917	0.5891	0.9249
	17	rs62055936	43848761	A	0.2173	0.2309	T	0.2917	0.5891	0.9249
	17	rs62055937	43848968	T	0.2173	0.2296	G	0.2401	0.6241	0.9315
	17	rs76294809	43849327	A	0.2173	0.2309	G	0.2917	0.5891	0.9249
	17	rs75916678	43849366	C	0.2173	0.2309	T	0.2917	0.5891	0.9249
	17	rs79730878	43849415	C	0.222	0.2334	T	0.2056	0.6503	0.9369
	17	rs62055938	43849656	A	0.2173	0.2309	C	0.2917	0.5891	0.9249
	17	rs62055939	43849787	T	0.2173	0.2309	A	0.2917	0.5891	0.9249
	17	rs62055940	43849896	G	0.2173	0.2309	A	0.2917	0.5891	0.9249
	17	rs76885724	43850519	T	0.2173	0.2309	C	0.2917	0.5891	0.9249
	17	rs60814418	43850645	T	0.2173	0.2309	C	0.2917	0.5891	0.9249
	17	rs62055942	43850966	G	0.2173	0.2309	A	0.2917	0.5891	0.9249
	17	rs62055943	43851018	C	0.2173	0.2309	T	0.2917	0.5891	0.9249
	17	rs62055945	43851851	A	0.2173	0.2309	G	0.2917	0.5891	0.9249
	17	rs62055946	43851971	A	0.2173	0.2309	C	0.2917	0.5891	0.9249
	17	rs62055947	43852605	T	0.215	0.2309	C	0.4018	0.5262	0.9122
	17	rs62055948	43852621	C	0.215	0.2309	T	0.4018	0.5262	0.9122
	17	rs113871181	43852733	A	0.2173	0.2309	G	0.2917	0.5891	0.9249
	17	rs111370985	43852742	C	0.2173	0.2309	T	0.2917	0.5891	0.9249
	17	rs55787105	43853109	A	0.2173	0.2309	G	0.2917	0.5891	0.9249
	17	rs62055950	43853133	C	0.2173	0.2309	T	0.2917	0.5891	0.9249
	17	rs56043078	43853235	G	0.2173	0.2309	T	0.2917	0.5891	0.9249
	17	rs77965652	43853457	G	0.2173	0.2309	A	0.2917	0.5891	0.9249
	17	rs55849949	43853526	G	0.2173	0.2309	A	0.2917	0.5891	0.9249
	17	rs56303031	43853922	A	0.2173	0.2309	G	0.2917	0.5891	0.9249
	17	rs55991914	43854267	T	0.2173	0.2309	C	0.2917	0.5891	0.9249
	17	rs62055955	43854340	G	0.2173	0.2309	A	0.2917	0.5891	0.9249
	17	rs62055956	43854449	T	0.2173	0.2321	C	0.3482	0.5551	0.9183
	17	rs62055957	43854536	A	0.2173	0.2309	C	0.2917	0.5891	0.9249
	17	rs4074462	43855228	T	0.2173	0.2309	G	0.2917	0.5891	0.9249
	17	rs62057061	43856639	G	0.2173	0.2309	C	0.2917	0.5891	0.9249
	17	rs62057062	43856710	A	0.2173	0.2309	G	0.2917	0.5891	0.9249
	17	rs62057063	43856730	T	0.2173	0.2309	C	0.2917	0.5891	0.9249
	17	rs62057064	43857033	T	0.2173	0.2309	C	0.2917	0.5891	0.9249
	17	rs76830096	43857129	C	0.2173	0.2309	A	0.2917	0.5891	0.9249
	17	rs62057065	43858187	T	0.2173	0.2309	G	0.2917	0.5891	0.9249
	17	rs62057067	43858326	T	0.2173	0.2309	C	0.2917	0.5891	0.9249
	17	rs78917495	43858482	T	0.2173	0.2309	C	0.2917	0.5891	0.9249
	17	rs62057068	43858629	G	0.2173	0.2309	A	0.2917	0.5891	0.9249
	17	rs62057069	43859065	C	0.2173	0.2309	T	0.2917	0.5891	0.9249
	17	rs62057070	43859640	G	0.2173	0.2309	A	0.2917	0.5891	0.9249
	17	rs62057071	43859691	G	0.2173	0.2309	C	0.2917	0.5891	0.9249
	17	rs62057073	43861117	T	0.2173	0.2309	C	0.2917	0.5891	0.9249
	17	rs56319902	43871982	T	0.2173	0.2334	C	0.4095	0.5222	0.9117
	17	rs55943044	43872228	A	0.2173	0.2334	G	0.4095	0.5222	0.9117
	17	rs80184151	43879308	G	0.2173	0.2309	A	0.2917	0.5891	0.9249
	17	rs17689378	43881790	T	0.2173	0.2309	C	0.2917	0.5891	0.9249
	17	rs62057101	43885291	A	0.2173	0.2309	G	0.2917	0.5891	0.9249
	17	rs62057103	43887480	C	0.2173	0.2309	T	0.2917	0.5891	0.9249
	17	rs55915917	43892784	G	0.2196	0.2309	T	0.1994	0.6552	0.9376
	17	rs55668363	43892788	A	0.2173	0.2309	G	0.2917	0.5891	0.9249
	17	rs17689471	43892973	C	0.2173	0.2309	T	0.2917	0.5891	0.9249
	17	rs117365970	43893259	A	0.2173	0.2309	G	0.2917	0.5891	0.9249
	17	rs117646503	43893260	C	0.2173	0.2309	T	0.2917	0.5891	0.9249
	17	rs17762769	43893403	A	0.2173	0.2309	G	0.2917	0.5891	0.9249
	17	rs8072451	43893716	T	0.2173	0.2309	C	0.2917	0.5891	0.9249
	17	rs8073146	43893751	G	0.2173	0.2309	A	0.2917	0.5891	0.9249
	17	rs28364025	43894102	C	0.2173	0.2309	T	0.2917	0.5891	0.9249
	17	rs28364023	43894159	T	0.2173	0.2309	C	0.2917	0.5891	0.9249
	17	rs55779147	43894510	A	0.2173	0.2309	G	0.2917	0.5891	0.9249
	17	rs56357543	43894547	T	0.2173	0.2309	C	0.2917	0.5891	0.9249
	17	rs56099546	43894609	G	0.2173	0.2309	A	0.2917	0.5891	0.9249
	17	rs4309444	43895797	C	0.2173	0.2309	T	0.2917	0.5891	0.9249
	17	rs62057107	43896032	T	0.2173	0.2309	C	0.2917	0.5891	0.9249
	17	rs12150390	43896228	C	0.2173	0.2309	T	0.2917	0.5891	0.9249
	17	rs17689608	43896528	G	0.2173	0.2309	C	0.2917	0.5891	0.9249
	17	rs62057108	43896616	C	0.2173	0.2309	T	0.2917	0.5891	0.9249
	17	rs62057109	43896637	C	0.2173	0.2309	T	0.2917	0.5891	0.9249
	17	rs78074121	43896690	C	0.2173	0.2309	T	0.2917	0.5891	0.9249
	17	rs62057110	43896734	C	0.2173	0.2309	T	0.2917	0.5891	0.9249
	17	rs62057111	43897130	G	0.2173	0.2309	A	0.2917	0.5891	0.9249
	17	rs62057112	43897202	A	0.2173	0.2309	T	0.2917	0.5891	0.9249
	17	rs78587102	43897246	G	0.2173	0.2309	A	0.2917	0.5891	0.9249
	17	rs62057113	43897449	T	0.2173	0.2309	A	0.2917	0.5891	0.9249
	17	rs78506181	43897480	G	0.2173	0.2309	A	0.2917	0.5891	0.9249
	17	rs79600142	43897722	C	0.2173	0.2309	T	0.2917	0.5891	0.9249
	17	rs111739681	43898459	T	0.2173	0.2309	C	0.2917	0.5891	0.9249
	17	rs17762882	43898887	C	0.2173	0.2309	T	0.2917	0.5891	0.9249
	17	rs17689653	43898963	T	0.2173	0.2309	A	0.2917	0.5891	0.9249
	17	rs17762912	43899161	C	0.2173	0.2309	A	0.2917	0.5891	0.9249
	17	rs62057114	43899401	T	0.2173	0.2309	C	0.2917	0.5891	0.9249
	17	rs62057115	43899417	C	0.2173	0.2309	G	0.2917	0.5891	0.9249
	17	rs78917479	43899611	T	0.2173	0.2309	C	0.2917	0.5891	0.9249
	17	rs62057116	43899655	C	0.2173	0.2309	T	0.2917	0.5891	0.9249
	17	rs62057117	43899657	G	0.2173	0.2309	C	0.2917	0.5891	0.9249
	17	rs62057118	43899727	G	0.2173	0.2309	A	0.2917	0.5891	0.9249
	17	rs62057119	43899736	A	0.2173	0.2309	G	0.2917	0.5891	0.9249
	17	rs17762954	43899786	T	0.2173	0.2309	C	0.2917	0.5891	0.9249
	17	rs55638417	43900434	G	0.2173	0.2309	A	0.2917	0.5891	0.9249
	17	rs79501144	43900697	T	0.2173	0.2309	C	0.2917	0.5891	0.9249
	17	rs112137135	43900817	G	0.2173	0.2309	A	0.2917	0.5891	0.9249
	17	rs62057122	43901001	T	0.2173	0.2309	C	0.2917	0.5891	0.9249
	17	rs62057123	43901238	G	0.2173	0.2309	A	0.2917	0.5891	0.9249
	17	rs62057143	43901528	C	0.2173	0.2309	T	0.2917	0.5891	0.9249
	17	rs62057144	43901558	G	0.2173	0.2309	A	0.2917	0.5891	0.9249
	17	rs3885074	43902738	A	0.2173	0.2309	C	0.2917	0.5891	0.9249
	17	rs3885075	43902799	G	0.2173	0.2309	A	0.2917	0.5891	0.9249
	17	rs41280116	43902842	T	0.2173	0.2309	C	0.2917	0.5891	0.9249
	17	rs34283254	43902861	A	0.2173	0.2309	C	0.2917	0.5891	0.9249
	17	rs1912151	43902944	T	0.2173	0.2309	C	0.2917	0.5891	0.9249
	17	rs41280118	43903089	T	0.2173	0.2309	C	0.2917	0.5891	0.9249
	17	rs62057146	43903106	G	0.2173	0.2309	A	0.2917	0.5891	0.9249
	17	rs62057147	43903298	A	0.2173	0.2309	G	0.2917	0.5891	0.9249
	17	rs17763050	43903336	A	0.2173	0.2296	G	0.2401	0.6241	0.9315
	17	rs62057148	43903485	C	0.2173	0.2309	G	0.2917	0.5891	0.9249
	17	rs62057149	43903546	G	0.2173	0.2309	A	0.2917	0.5891	0.9249
	17	rs62057150	43903548	T	0.2173	0.2309	C	0.2917	0.5891	0.9249
	17	rs62057151	43903842	T	0.2243	0.2385	C	0.3129	0.5759	0.9231
	17	rs62057152	43904110	C	0.2173	0.2309	G	0.2917	0.5891	0.9249
	17	rs17689824	43904397	T	0.2173	0.2309	C	0.2917	0.5891	0.9249
	17	rs62057153	43904528	C	0.2173	0.2309	T	0.2917	0.5891	0.9249
	17	rs62057154	43904610	T	0.2173	0.2309	C	0.2917	0.5891	0.9249
	17	rs62057155	43904673	T	0.2173	0.2309	C	0.2917	0.5891	0.9249
	17	rs62057156	43904948	C	0.2173	0.2309	G	0.2917	0.5891	0.9249
	17	rs78872653	43905134	A	0.2173	0.2309	G	0.2917	0.5891	0.9249
	17	rs62057157	43905313	C	0.2173	0.2309	G	0.2917	0.5891	0.9249
	17	rs17763086	43905481	G	0.2173	0.2309	T	0.2917	0.5891	0.9249
	17	rs17689882	43906828	A	0.2173	0.2309	G	0.2917	0.5891	0.9249
	17	rs62057158	43907143	A	0.2173	0.2309	G	0.2917	0.5891	0.9249
	17	rs55763795	43908773	C	0.2173	0.2309	G	0.2917	0.5891	0.9249
	17	rs55865707	43908826	G	0.2173	0.2309	T	0.2917	0.5891	0.9249
	17	rs62054760	43908989	T	0.2173	0.2296	C	0.2401	0.6241	0.9315
	17	rs62054761	43909008	T	0.2173	0.2296	C	0.2401	0.6241	0.9315
	17	rs62054762	43909022	T	0.2173	0.2296	G	0.2401	0.6241	0.9315
	17	rs17689918	43910088	A	0.2173	0.2309	G	0.2917	0.5891	0.9249
	17	rs62054763	43910262	G	0.2173	0.2309	C	0.2917	0.5891	0.9249
	17	rs16940674	43910507	T	0.2173	0.2309	C	0.2917	0.5891	0.9249
	17	rs41457044	43911424	T	0.2173	0.2309	C	0.2917	0.5891	0.9249
	17	rs16940681	43912159	C	0.2173	0.2309	G	0.2917	0.5891	0.9249
	17	rs28364021	43912282	T	0.2173	0.2309	C	0.2917	0.5891	0.9249
	17	rs878886	43912490	G	0.2173	0.2309	C	0.2917	0.5891	0.9249
	17	rs878887	43912582	T	0.2173	0.2309	C	0.2917	0.5891	0.9249
	17	rs4482334	43912830	C	0.2173	0.2309	T	0.2917	0.5891	0.9249
	17	rs56127111	43913315	T	0.2173	0.2309	C	0.2917	0.5891	0.9249
	17	rs75104593	43913557	G	0.215	0.2309	T	0.4018	0.5262	0.9122
	17	rs74998289	43913558	G	0.215	0.2309	T	0.4018	0.5262	0.9122
	17	rs10445362	43914554	A	0.2173	0.2309	C	0.2917	0.5891	0.9249
	17	rs10445363	43914558	A	0.2173	0.2309	G	0.2917	0.5891	0.9249
	17	rs62054802	43914598	C	0.2173	0.2309	G	0.2917	0.5891	0.9249
	17	rs62054803	43914728	T	0.2173	0.2309	G	0.2917	0.5891	0.9249
	17	rs62054804	43914809	T	0.2173	0.2309	C	0.2917	0.5891	0.9249
	17	rs62054805	43915054	G	0.2173	0.2309	A	0.2917	0.5891	0.9249
	17	rs62054806	43915312	T	0.2173	0.2309	C	0.2917	0.5891	0.9249
	17	rs10445364	43916356	A	0.2173	0.2309	G	0.2917	0.5891	0.9249
	17	rs10445333	43916509	G	0.2173	0.2309	A	0.2917	0.5891	0.9249
	17	rs17690176	43916773	C	0.2173	0.2309	A	0.2917	0.5891	0.9249
	17	rs78328427	43916932	A	0.2173	0.2309	G	0.2917	0.5891	0.9249
	17	rs77692262	43917086	G	0.2173	0.2309	A	0.2917	0.5891	0.9249
	17	rs56023973	43917776	T	0.2173	0.2309	G	0.2917	0.5891	0.9249
	17	rs17763515	43917818	A	0.2173	0.2309	G	0.2917	0.5891	0.9249
	17	rs17763533	43918190	C	0.2173	0.2309	T	0.2917	0.5891	0.9249
	17	rs62054809	43918239	T	0.2173	0.2309	C	0.2917	0.5891	0.9249
	17	rs112583797	43918418	G	0.2173	0.2309	A	0.2917	0.5891	0.9249
	17	rs74922289	43918524	G	0.2173	0.2309	A	0.2917	0.5891	0.9249
	17	rs56971664	43918613	C	0.2173	0.2309	T	0.2917	0.5891	0.9249
	17	rs62054811	43918651	G	0.2173	0.2309	C	0.2917	0.5891	0.9249
	17	rs2106785	43919105	T	0.2173	0.2283	C	0.1934	0.6601	0.9383
	17	rs56150806	43919301	C	0.2173	0.2309	T	0.2917	0.5891	0.9249
	17	rs17690314	43919884	G	0.2173	0.2309	T	0.2917	0.5891	0.9249
	17	rs56233672	43920300	C	0.2173	0.2309	T	0.2917	0.5891	0.9249
	17	rs56354807	43920378	T	0.2173	0.2309	C	0.2917	0.5891	0.9249
	17	rs55718212	43920411	C	0.2173	0.2309	T	0.2917	0.5891	0.9249
	17	rs17690326	43920974	C	0.2173	0.2309	T	0.2917	0.5891	0.9249
	17	rs17763596	43921210	T	0.2173	0.2309	G	0.2917	0.5891	0.9249
	17	rs62054814	43921572	A	0.2173	0.2309	T	0.2917	0.5891	0.9249
	17	rs17763634	43921754	C	0.2173	0.2309	T	0.2917	0.5891	0.9249
	17	rs12185233	43923654	C	0.2173	0.2309	G	0.2917	0.5891	0.9249
	17	rs12185268	43923683	G	0.2173	0.2309	A	0.2917	0.5891	0.9249
	17	rs12185235	43923703	T	0.2173	0.2309	C	0.2917	0.5891	0.9249
	17	rs11079725	43923934	C	0.2173	0.2309	T	0.2917	0.5891	0.9249
	17	rs12373123	43924073	C	0.2173	0.2309	T	0.2917	0.5891	0.9249
	17	rs12373139	43924130	A	0.2173	0.2309	G	0.2917	0.5891	0.9249
	17	rs12373142	43924200	G	0.215	0.2309	C	0.4018	0.5262	0.9122
	17	rs12373124	43924219	C	0.215	0.2309	T	0.4018	0.5262	0.9122
	17	rs12373140	43924231	A	0.215	0.2309	G	0.4018	0.5262	0.9122
	17	rs12373168	43924337	C	0.2173	0.2309	A	0.2917	0.5891	0.9249
	17	rs17690661	43924521	A	0.2173	0.2309	G	0.2917	0.5891	0.9249
	17	rs55943825	43924776	T	0.2173	0.2309	C	0.2917	0.5891	0.9249
	17	rs17690679	43924803	G	0.2173	0.2309	A	0.2917	0.5891	0.9249
	17	rs17769490	43925605	A	0.2173	0.2309	G	0.2917	0.5891	0.9249
	17	rs77063768	43925729	G	0.2173	0.2309	A	0.2917	0.5891	0.9249
	17	rs62054817	43925966	A	0.2173	0.2309	G	0.2917	0.5891	0.9249
	17	rs62054818	43926056	C	0.2173	0.2309	A	0.2917	0.5891	0.9249
	17	rs62054819	43926149	G	0.2173	0.2309	A	0.2917	0.5891	0.9249
	17	rs62054820	43926755	G	0.2173	0.2309	A	0.2917	0.5891	0.9249
	17	rs56113217	43926948	G	0.2173	0.2309	A	0.2917	0.5891	0.9249
	17	rs56269136	43926992	T	0.2173	0.2309	C	0.2917	0.5891	0.9249
	17	rs56385754	43927255	T	0.2173	0.2309	G	0.2917	0.5891	0.9249
	17	rs17769552	43927290	A	0.2173	0.2309	G	0.2917	0.5891	0.9249
	17	rs62054822	43927708	G	0.2173	0.2309	A	0.2917	0.5891	0.9249
	17	rs885639	43928614	G	0.2173	0.2309	T	0.2917	0.5891	0.9249
	17	rs62054823	43929029	G	0.2173	0.2309	A	0.2917	0.5891	0.9249
	17	rs62054824	43929992	T	0.2173	0.2309	C	0.2917	0.5891	0.9249
	17	rs62054825	43930033	A	0.2173	0.2309	G	0.2917	0.5891	0.9249
	17	rs79589869	43930238	A	0.2173	0.2309	C	0.2917	0.5891	0.9249
	17	rs56026128	43931244	C	0.2173	0.2309	G	0.2917	0.5891	0.9249
	17	rs56329743	43931245	A	0.2173	0.2309	G	0.2917	0.5891	0.9249
	17	rs56288604	43931380	G	0.2173	0.2309	A	0.2917	0.5891	0.9249
	17	rs17690987	43931626	C	0.2173	0.2309	T	0.2917	0.5891	0.9249
	17	rs56146262	43931907	A	0.2173	0.2309	C	0.2917	0.5891	0.9249
	17	rs55942528	43932028	G	0.215	0.2309	A	0.4018	0.5262	0.9122
	17	rs56254732	43932049	T	0.215	0.2309	C	0.4018	0.5262	0.9122
	17	rs56323304	43932129	T	0.215	0.2296	C	0.3408	0.5593	0.9188
	17	rs55751924	43932155	G	0.215	0.2309	A	0.4018	0.5262	0.9122
	17	rs55660209	43932173	G	0.215	0.2283	A	0.2848	0.5936	0.9254
	17	rs113856644	43932277	A	0.2173	0.2309	G	0.2917	0.5891	0.9249
	17	rs62054831	43932381	T	0.2173	0.2309	C	0.2917	0.5891	0.9249
	17	rs4627402	43932741	T	0.2173	0.2309	C	0.2917	0.5891	0.9249
	17	rs62054832	43933579	A	0.2173	0.2296	C	0.2401	0.6241	0.9315
	17	rs62054833	43933673	C	0.2173	0.2309	T	0.2917	0.5891	0.9249
	17	rs76563578	43933879	G	0.2173	0.2309	C	0.2917	0.5891	0.9249
	17	rs111962225	43934016	C	0.2173	0.2309	G	0.2917	0.5891	0.9249
	17	rs62054834	43934314	C	0.2173	0.2309	T	0.2917	0.5891	0.9249
	17	rs62054835	43934672	C	0.2173	0.2309	A	0.2917	0.5891	0.9249
	17	rs10445369	43934776	G	0.2173	0.2309	A	0.2917	0.5891	0.9249
	17	rs10445334	43934826	G	0.2173	0.2309	T	0.2917	0.5891	0.9249
	17	rs10445335	43934896	A	0.2173	0.2309	T	0.2917	0.5891	0.9249
	17	rs10445336	43934948	G	0.2173	0.2309	A	0.2917	0.5891	0.9249
	17	rs10445370	43935118	A	0.2173	0.2309	G	0.2917	0.5891	0.9249
	17	rs55996632	43935888	T	0.2173	0.2309	C	0.2917	0.5891	0.9249
	17	rs55886302	43936011	G	0.2173	0.2309	A	0.2917	0.5891	0.9249
	17	rs56136075	43936298	A	0.2173	0.2309	C	0.2917	0.5891	0.9249
	17	rs62054841	43937104	A	0.2173	0.2309	G	0.2917	0.5891	0.9249
	17	rs62054842	43937162	T	0.2173	0.2309	C	0.2917	0.5891	0.9249
	17	rs62054843	43937184	C	0.2173	0.2309	T	0.2917	0.5891	0.9249
	17	rs62054844	43937333	G	0.2173	0.2309	T	0.2917	0.5891	0.9249
	17	rs76627340	43937460	A	0.2173	0.2309	G	0.2917	0.5891	0.9249
	17	rs75945623	43937505	T	0.2173	0.2321	C	0.3482	0.5551	0.9183
	17	rs79889833	43937633	G	0.2173	0.2309	A	0.2917	0.5891	0.9249
	17	rs77625338	43937671	T	0.2173	0.2309	C	0.2917	0.5891	0.9249
	17	rs77489223	43937736	T	0.2173	0.2309	C	0.2917	0.5891	0.9249
	17	rs55888391	43938107	G	0.2173	0.2309	A	0.2917	0.5891	0.9249
	17	rs76329216	43938499	A	0.2173	0.2309	G	0.2917	0.5891	0.9249
	17	rs62054846	43938634	G	0.2173	0.2309	A	0.2917	0.5891	0.9249
	17	rs55646970	43938796	G	0.2173	0.2309	A	0.2917	0.5891	0.9249
	17	rs55673092	43938882	A	0.2173	0.2309	G	0.2917	0.5891	0.9249
	17	rs56347602	43939255	C	0.2173	0.2309	T	0.2917	0.5891	0.9249
	17	rs56249080	43939432	T	0.2173	0.2309	G	0.2917	0.5891	0.9249
	17	rs56227067	43939609	T	0.2173	0.2309	A	0.2917	0.5891	0.9249
	17	rs55719714	43939638	A	0.2173	0.2309	G	0.2917	0.5891	0.9249
	17	rs56299858	43939659	A	0.2173	0.2309	G	0.2917	0.5891	0.9249
	17	rs62054857	43939936	A	0.2173	0.2309	G	0.2917	0.5891	0.9249
	17	rs75210307	43940012	C	0.215	0.2296	T	0.3408	0.5593	0.9188
	17	rs74944644	43940020	C	0.215	0.2296	T	0.3408	0.5593	0.9188
	17	rs62054858	43940188	C	0.2173	0.2309	T	0.2917	0.5891	0.9249
	17	rs79406732	43940497	T	0.2173	0.2309	C	0.2917	0.5891	0.9249
	17	rs62054859	43940685	A	0.2173	0.2309	G	0.2917	0.5891	0.9249
	17	rs62055460	43940825	C	0.2173	0.2309	G	0.2917	0.5891	0.9249
	17	rs62055461	43941350	T	0.2173	0.2309	C	0.2917	0.5891	0.9249
	17	rs62055462	43941476	C	0.2173	0.2309	A	0.2917	0.5891	0.9249
	17	rs62055463	43941491	G	0.2173	0.2309	A	0.2917	0.5891	0.9249
	17	rs77652965	43941608	G	0.2173	0.2309	C	0.2917	0.5891	0.9249
	17	rs75690239	43941710	T	0.2173	0.2309	C	0.2917	0.5891	0.9249
	17	rs62055464	43941858	G	0.2173	0.2309	T	0.2917	0.5891	0.9249
	17	rs62055465	43942046	A	0.2173	0.2309	T	0.2917	0.5891	0.9249
	17	rs62055466	43942656	A	0.2173	0.2309	G	0.2917	0.5891	0.9249
	17	rs62055467	43942820	C	0.2173	0.2309	T	0.2917	0.5891	0.9249
	17	rs62055468	43943000	C	0.2173	0.2309	A	0.2917	0.5891	0.9249
	17	rs62055469	43943655	C	0.2173	0.2309	A	0.2917	0.5891	0.9249
	17	rs62055470	43943657	G	0.2173	0.2309	A	0.2917	0.5891	0.9249
	17	rs62055471	43943755	C	0.2173	0.2309	T	0.2917	0.5891	0.9249
	17	rs56327054	43943957	C	0.2173	0.2309	G	0.2917	0.5891	0.9249
	17	rs56036719	43943974	T	0.2173	0.2309	C	0.2917	0.5891	0.9249
	17	rs55781174	43944158	T	0.2173	0.2309	C	0.2917	0.5891	0.9249
	17	rs12150223	43944204	C	0.2173	0.2309	T	0.2917	0.5891	0.9249
	17	rs12150516	43944519	T	0.2173	0.2309	C	0.2917	0.5891	0.9249
	17	rs62055475	43945106	C	0.2173	0.2309	T	0.2917	0.5891	0.9249
	17	rs78637438	43945855	A	0.2173	0.2309	G	0.2917	0.5891	0.9249
	17	rs62055478	43945938	T	0.2173	0.2309	C	0.2917	0.5891	0.9249
	17	rs886249	43946291	G	0.2033	0.2194	A	0.428	0.513	0.9078
	17	rs56398500	43947488	G	0.2173	0.2309	A	0.2917	0.5891	0.9249
	17	rs56289364	43947928	G	0.2173	0.2309	A	0.2917	0.5891	0.9249
	17	rs62055483	43948040	T	0.2173	0.2309	C	0.2917	0.5891	0.9249
	17	rs78238042	43948159	A	0.2173	0.2309	G	0.2917	0.5891	0.9249
	17	rs55673340	43948733	T	0.2173	0.2309	C	0.2917	0.5891	0.9249
	17	rs62055486	43949092	G	0.2173	0.2309	T	0.2917	0.5891	0.9249
	17	rs62055488	43950394	T	0.2173	0.2309	C	0.2917	0.5891	0.9249
	17	rs62055490	43950533	G	0.2173	0.2309	A	0.2917	0.5891	0.9249
	17	rs62055491	43951120	C	0.2173	0.2309	T	0.2917	0.5891	0.9249
	17	rs62055492	43951345	A	0.2173	0.2309	C	0.2917	0.5891	0.9249
	17	rs80348388	43952634	T	0.2173	0.2309	A	0.2917	0.5891	0.9249
	17	rs62055493	43952944	C	0.2173	0.2309	T	0.2917	0.5891	0.9249
	17	rs62055494	43953016	T	0.2173	0.2309	C	0.2917	0.5891	0.9249
	17	rs62055495	43953043	C	0.2173	0.2309	A	0.2917	0.5891	0.9249
	17	rs62055496	43953307	T	0.2173	0.2309	C	0.2917	0.5891	0.9249
	17	rs62055497	43953529	G	0.2173	0.2309	A	0.2917	0.5891	0.9249
	17	rs3919455	43953707	T	0.2173	0.2309	C	0.2917	0.5891	0.9249
	17	rs62055498	43953814	A	0.2173	0.2309	G	0.2917	0.5891	0.9249
	17	rs62055499	43953991	G	0.2173	0.2309	C	0.2917	0.5891	0.9249
	17	rs62055500	43954134	A	0.2173	0.2309	G	0.2917	0.5891	0.9249
	17	rs62055501	43954227	A	0.2173	0.2309	G	0.2917	0.5891	0.9249
	17	rs62055502	43954284	A	0.2173	0.2309	G	0.2917	0.5891	0.9249
	17	rs4441322	43955030	G	0.2173	0.2309	A	0.2917	0.5891	0.9249
	17	rs113414067	43955093	C	0.2173	0.2309	T	0.2917	0.5891	0.9249
	17	rs55905252	43955365	A	0.2173	0.2309	C	0.2917	0.5891	0.9249
	17	rs17691328	43955487	T	0.2173	0.2309	C	0.2917	0.5891	0.9249
	17	rs62055515	43956370	T	0.2173	0.2309	G	0.2917	0.5891	0.9249
	17	rs62055516	43956390	C	0.2173	0.2309	T	0.2917	0.5891	0.9249
	17	rs62055517	43956425	T	0.2173	0.2309	C	0.2917	0.5891	0.9249
	17	rs62055518	43956505	C	0.2173	0.2309	A	0.2917	0.5891	0.9249
	17	rs56364632	43956642	C	0.2173	0.2309	T	0.2917	0.5891	0.9249
	17	rs55768605	43956734	A	0.2173	0.2309	C	0.2917	0.5891	0.9249
	17	rs55653657	43956778	G	0.2173	0.2309	A	0.2917	0.5891	0.9249
	17	rs55894109	43957221	T	0.2173	0.2309	C	0.2917	0.5891	0.9249
	17	rs56101773	43957269	C	0.2173	0.2309	T	0.2917	0.5891	0.9249
	17	rs56249780	43957328	T	0.2173	0.2309	C	0.2917	0.5891	0.9249
	17	rs56040418	43958079	T	0.2173	0.2309	C	0.2917	0.5891	0.9249
	17	rs55721252	43958099	C	0.2173	0.2309	T	0.2917	0.5891	0.9249
	17	rs55876817	43958139	C	0.2173	0.2309	A	0.2917	0.5891	0.9249
	17	rs55944735	43958172	G	0.2173	0.2309	A	0.2917	0.5891	0.9249
	17	rs62055525	43958736	A	0.2173	0.2309	G	0.2917	0.5891	0.9249
	17	rs112915466	43958744	G	0.2173	0.2309	A	0.2917	0.5891	0.9249
	17	rs56343551	43959092	T	0.2173	0.2309	G	0.2917	0.5891	0.9249
	17	rs55975673	43959113	G	0.2173	0.2309	A	0.2917	0.5891	0.9249
	17	rs56387391	43959261	A	0.2173	0.2309	G	0.2917	0.5891	0.9249
	17	rs62055529	43960020	G	0.2173	0.2309	A	0.2917	0.5891	0.9249
	17	rs79580365	43960172	T	0.2173	0.2309	C	0.2917	0.5891	0.9249
	17	rs55937610	43960283	G	0.2173	0.2309	A	0.2917	0.5891	0.9249
	17	rs56365901	43960323	G	0.2173	0.2309	A	0.2917	0.5891	0.9249
	17	rs55767267	43960325	C	0.2173	0.2309	T	0.2917	0.5891	0.9249
	17	rs56127309	43960341	A	0.2173	0.2309	G	0.2917	0.5891	0.9249
	17	rs56194412	43960600	C	0.2173	0.2309	T	0.2917	0.5891	0.9249
	17	rs56338487	43960812	T	0.2173	0.2309	A	0.2917	0.5891	0.9249
	17	rs56180212	43960911	G	0.2173	0.2309	A	0.2917	0.5891	0.9249
	17	rs56301449	43960918	C	0.2173	0.2309	T	0.2917	0.5891	0.9249
	17	rs62055538	43960997	C	0.2173	0.2309	T	0.2917	0.5891	0.9249
	17	rs62055539	43961044	G	0.2173	0.2309	A	0.2917	0.5891	0.9249
	17	rs62055540	43961142	C	0.2173	0.2309	T	0.2917	0.5891	0.9249
	17	rs17770108	43961292	T	0.2173	0.2309	G	0.2917	0.5891	0.9249
	17	rs62055541	43962017	C	0.2173	0.2309	G	0.2917	0.5891	0.9249
	17	rs77426526	43962982	A	0.2173	0.2309	G	0.2917	0.5891	0.9249
	17	rs77129180	43963046	A	0.2173	0.2309	G	0.2917	0.5891	0.9249
	17	rs74863825	43963120	T	0.2173	0.2309	C	0.2917	0.5891	0.9249
	17	rs80254317	43963282	G	0.2173	0.2309	C	0.2917	0.5891	0.9249
	17	rs112425426	43963416	G	0.2173	0.2309	C	0.2917	0.5891	0.9249
	17	rs62055542	43963844	T	0.2173	0.2309	C	0.2917	0.5891	0.9249
	17	rs17770120	43963943	A	0.2173	0.2309	C	0.2917	0.5891	0.9249
	17	rs17770150	43964163	A	0.2173	0.2309	G	0.2917	0.5891	0.9249
	17	rs17770186	43964191	A	0.2173	0.2309	C	0.2917	0.5891	0.9249
	17	rs17691449	43964283	C	0.2173	0.2309	G	0.2917	0.5891	0.9249
	17	rs62055544	43964539	G	0.2173	0.2321	A	0.3482	0.5551	0.9183
	17	rs62055545	43964561	T	0.2173	0.2309	C	0.2917	0.5891	0.9249
	17	rs62055546	43964567	C	0.2173	0.2309	A	0.2917	0.5891	0.9249
	17	rs62055547	43964755	T	0.2173	0.2309	C	0.2917	0.5891	0.9249
	17	rs62055548	43964899	G	0.2173	0.2309	A	0.2917	0.5891	0.9249
	17	rs113327263	43965063	C	0.2173	0.2309	T	0.2917	0.5891	0.9249
	17	rs62055549	43965595	C	0.2173	0.2309	G	0.2917	0.5891	0.9249
	17	rs62055550	43965680	A	0.2173	0.2309	G	0.2917	0.5891	0.9249
	17	rs62055551	43965687	G	0.2173	0.2309	C	0.2917	0.5891	0.9249
	17	rs62055552	43965955	G	0.2173	0.2309	A	0.2917	0.5891	0.9249
	17	rs62055553	43966178	A	0.2173	0.2309	C	0.2917	0.5891	0.9249
	17	rs62055554	43966260	G	0.2173	0.2309	A	0.2917	0.5891	0.9249
	17	rs111941646	43966608	T	0.2173	0.2309	A	0.2917	0.5891	0.9249
	17	rs62055556	43966749	C	0.2173	0.2309	T	0.2917	0.5891	0.9249
	17	rs62055557	43966795	A	0.2173	0.2309	C	0.2917	0.5891	0.9249
	17	rs62055558	43966955	G	0.2173	0.2309	A	0.2917	0.5891	0.9249
	17	rs62055559	43967138	G	0.2173	0.2309	T	0.2917	0.5891	0.9249
	17	rs79193046	43967562	C	0.2173	0.2309	T	0.2917	0.5891	0.9249
	17	rs17691466	43968219	G	0.2173	0.2309	A	0.2917	0.5891	0.9249
	17	rs17691508	43968463	G	0.2173	0.2309	C	0.2917	0.5891	0.9249
	17	rs62056760	43968572	A	0.2173	0.2309	G	0.2917	0.5891	0.9249
	17	rs55943606	43968874	G	0.2173	0.2309	A	0.2917	0.5891	0.9249
	17	rs55895732	43968937	C	0.2173	0.2309	T	0.2917	0.5891	0.9249
	17	rs55960528	43968994	C	0.2173	0.2309	T	0.2917	0.5891	0.9249
	17	rs55877243	43969019	C	0.2173	0.2309	T	0.2917	0.5891	0.9249
	17	rs17770296	43969136	T	0.2173	0.2309	C	0.2917	0.5891	0.9249
	17	rs17691556	43969168	A	0.2173	0.2309	T	0.2917	0.5891	0.9249
	17	rs62056761	43969686	A	0.2173	0.2309	T	0.2917	0.5891	0.9249
	17	rs17770337	43969779	T	0.2173	0.2309	G	0.2917	0.5891	0.9249
	17	rs62056773	43969833	G	0.2173	0.2309	A	0.2917	0.5891	0.9249
	17	rs62056774	43969901	A	0.2173	0.2309	G	0.2917	0.5891	0.9249
	17	rs62056775	43969952	C	0.2173	0.2309	T	0.2917	0.5891	0.9249
	17	rs62056776	43969995	T	0.2173	0.2309	C	0.2917	0.5891	0.9249
	17	rs78729125	43970108	A	0.2173	0.2309	C	0.2917	0.5891	0.9249
	17	rs17770343	43970154	C	0.2173	0.2309	T	0.2917	0.5891	0.9249
	17	rs62056777	43970303	A	0.2173	0.2309	G	0.2917	0.5891	0.9249
	17	rs17691610	43970662	T	0.2173	0.2309	G	0.2917	0.5891	0.9249
	17	rs76594404	43971457	C	0.2173	0.2309	G	0.2917	0.5891	0.9249
	17	rs80233201	43971481	C	0.2173	0.2309	T	0.2917	0.5891	0.9249
	17	rs62056778	43971604	G	0.2173	0.2309	C	0.2917	0.5891	0.9249
	17	rs11575895	43971785	G	0.2173	0.2309	A	0.2917	0.5891	0.9249
	17	rs62056779	43971937	A	0.2173	0.2309	C	0.2917	0.5891	0.9249
	17	rs11575896	43972142	A	0.2173	0.2309	G	0.2917	0.5891	0.9249
	17	rs74457229	43972581	T	0.2173	0.2309	C	0.2917	0.5891	0.9249
	17	rs74548327	43973080	G	0.2173	0.2309	A	0.2917	0.5891	0.9249
	17	rs111972148	43973121	C	0.2173	0.2309	G	0.2917	0.5891	0.9249
	17	rs76324150	43973233	T	0.2173	0.2309	C	0.2917	0.5891	0.9249
	17	rs113347741	43973408	T	0.2173	0.2309	C	0.2917	0.5891	0.9249
	17	rs78720789	43973413	G	0.2173	0.2309	A	0.2917	0.5891	0.9249
	17	rs62056780	43973652	T	0.2173	0.2309	C	0.2917	0.5891	0.9249
	17	rs62056781	43973899	C	0.2173	0.2309	T	0.2917	0.5891	0.9249
	17	rs74496580	43974065	A	0.2173	0.2309	C	0.2917	0.5891	0.9249
	17	rs62056782	43974230	T	0.2173	0.2309	C	0.2917	0.5891	0.9249
	17	rs80346216	43974476	T	0.2173	0.2309	G	0.2917	0.5891	0.9249
	17	rs76632685	43974477	T	0.2173	0.2309	A	0.2917	0.5891	0.9249
[truncated: 1,023 more rows]

## Sheet: S3
Supplementary file 3: Summary statistics of GWAS loci in cell proportion QTLs profile
SNP	risk_allele	Immune cell traits ID	Immune cell traits	beta_300DM	p_300DM
rs56994090	T	BCell(CD19+)_LMI1_grandparentPerc__Index1	B cells (CD19+)_GrandParentalPercentage	0.0043748	9.28482e-05
rs7804356	T	BCell(CD19+)_LMI1_grandparentPerc__Index1	B cells (CD19+)_GrandParentalPercentage	-0.00303747	0.00516512
rs924043	C	BCell(CD19+)_LMI1_grandparentPerc__Index1	B cells (CD19+)_GrandParentalPercentage	-0.00287458	0.0356953
rs72928038	A	BCell(CD19+)_LMI1_grandparentPerc__Index1	B cells (CD19+)_GrandParentalPercentage	-0.00250854	0.0494816
rs2281808	C	BCell(CD19+)_LMI1_grandparentPerc__Index1	B cells (CD19+)_GrandParentalPercentage	0.00192159	0.0535711
rs11203203	A	BCell(CD19+)_LMI1_grandparentPerc__Index1	B cells (CD19+)_GrandParentalPercentage	0.00165919	0.0802038
rs516246	T	BCell(CD19+)_LMI1_grandparentPerc__Index1	B cells (CD19+)_GrandParentalPercentage	0.00145146	0.104457
rs4505848	G	BCell(CD19+)_LMI1_grandparentPerc__Index1	B cells (CD19+)_GrandParentalPercentage	0.00144551	0.111439
rs4900384	G	BCell(CD19+)_LMI1_grandparentPerc__Index1	B cells (CD19+)_GrandParentalPercentage	0.0016129	0.120894
rs2611215	A	BCell(CD19+)_LMI1_grandparentPerc__Index1	B cells (CD19+)_GrandParentalPercentage	-0.00174167	0.131079
rs12927355	C	BCell(CD19+)_LMI1_grandparentPerc__Index1	B cells (CD19+)_GrandParentalPercentage	0.00143606	0.14784
rs1052553	A	BCell(CD19+)_LMI1_grandparentPerc__Index1	B cells (CD19+)_GrandParentalPercentage	-0.00163378	0.149604
rs425105	T	BCell(CD19+)_LMI1_grandparentPerc__Index1	B cells (CD19+)_GrandParentalPercentage	-0.00190279	0.150597
rs2269241	C	BCell(CD19+)_LMI1_grandparentPerc__Index1	B cells (CD19+)_GrandParentalPercentage	0.00195114	0.158728
rs1534422	G	BCell(CD19+)_LMI1_grandparentPerc__Index1	B cells (CD19+)_GrandParentalPercentage	-0.00133462	0.187471
rs4763879	A	BCell(CD19+)_LMI1_grandparentPerc__Index1	B cells (CD19+)_GrandParentalPercentage	0.00117569	0.198128
rs10517086	A	BCell(CD19+)_LMI1_grandparentPerc__Index1	B cells (CD19+)_GrandParentalPercentage	-0.00118859	0.221697
rs2476601	A	BCell(CD19+)_LMI1_grandparentPerc__Index1	B cells (CD19+)_GrandParentalPercentage	0.00142463	0.232048
rs947474	A	BCell(CD19+)_LMI1_grandparentPerc__Index1	B cells (CD19+)_GrandParentalPercentage	0.00129825	0.239964
rs10786436	T	BCell(CD19+)_LMI1_grandparentPerc__Index1	B cells (CD19+)_GrandParentalPercentage	0.00120077	0.245352
rs193778	G	BCell(CD19+)_LMI1_grandparentPerc__Index1	B cells (CD19+)_GrandParentalPercentage	-0.00115437	0.256667
rs10137082	C	BCell(CD19+)_LMI1_grandparentPerc__Index1	B cells (CD19+)_GrandParentalPercentage	-0.00112728	0.288304
rs4788084	C	BCell(CD19+)_LMI1_grandparentPerc__Index1	B cells (CD19+)_GrandParentalPercentage	0.000994667	0.292612
rs4849135	G	BCell(CD19+)_LMI1_grandparentPerc__Index1	B cells (CD19+)_GrandParentalPercentage	-0.00109019	0.294669
rs72727394	T	BCell(CD19+)_LMI1_grandparentPerc__Index1	B cells (CD19+)_GrandParentalPercentage	-0.001177	0.297014
rs539514	T	BCell(CD19+)_LMI1_grandparentPerc__Index1	B cells (CD19+)_GrandParentalPercentage	-0.000961332	0.302466
rs9585056	C	BCell(CD19+)_LMI1_grandparentPerc__Index1	B cells (CD19+)_GrandParentalPercentage	-0.00107446	0.332027
rs3825932	T	BCell(CD19+)_LMI1_grandparentPerc__Index1	B cells (CD19+)_GrandParentalPercentage	-0.000951705	0.332129
rs16956936	C	BCell(CD19+)_LMI1_grandparentPerc__Index1	B cells (CD19+)_GrandParentalPercentage	0.00142353	0.33902
rs11954020	G	BCell(CD19+)_LMI1_grandparentPerc__Index1	B cells (CD19+)_GrandParentalPercentage	-0.000849313	0.362369
rs12679857	A	BCell(CD19+)_LMI1_grandparentPerc__Index1	B cells (CD19+)_GrandParentalPercentage	0.00088749	0.376862
rs9388489	G	BCell(CD19+)_LMI1_grandparentPerc__Index1	B cells (CD19+)_GrandParentalPercentage	0.000791936	0.378551
rs6547853	G	BCell(CD19+)_LMI1_grandparentPerc__Index1	B cells (CD19+)_GrandParentalPercentage	-0.000762319	0.40125
rs3087243	G	BCell(CD19+)_LMI1_grandparentPerc__Index1	B cells (CD19+)_GrandParentalPercentage	0.00080082	0.408726
rs229533	C	BCell(CD19+)_LMI1_grandparentPerc__Index1	B cells (CD19+)_GrandParentalPercentage	0.000781277	0.420785
rs1983853	C	BCell(CD19+)_LMI1_grandparentPerc__Index1	B cells (CD19+)_GrandParentalPercentage	-0.00143188	0.424546
rs11574435	C	BCell(CD19+)_LMI1_grandparentPerc__Index1	B cells (CD19+)_GrandParentalPercentage	-0.00115404	0.519272
rs1615504	T	BCell(CD19+)_LMI1_grandparentPerc__Index1	B cells (CD19+)_GrandParentalPercentage	0.000640274	0.529098
rs1893217	G	BCell(CD19+)_LMI1_grandparentPerc__Index1	B cells (CD19+)_GrandParentalPercentage	0.000701657	0.54307
rs10509540	T	BCell(CD19+)_LMI1_grandparentPerc__Index1	B cells (CD19+)_GrandParentalPercentage	0.00053232	0.585357
rs5753037	T	BCell(CD19+)_LMI1_grandparentPerc__Index1	B cells (CD19+)_GrandParentalPercentage	-0.000525815	0.586552
rs10795791	G	BCell(CD19+)_LMI1_grandparentPerc__Index1	B cells (CD19+)_GrandParentalPercentage	-0.0005262	0.589204
rs6518350	A	BCell(CD19+)_LMI1_grandparentPerc__Index1	B cells (CD19+)_GrandParentalPercentage	-0.000715667	0.58973
rs7202877	G	BCell(CD19+)_LMI1_grandparentPerc__Index1	B cells (CD19+)_GrandParentalPercentage	0.000707662	0.626187
rs1990760	T	BCell(CD19+)_LMI1_grandparentPerc__Index1	B cells (CD19+)_GrandParentalPercentage	0.00045694	0.643507
rs11258747	T	BCell(CD19+)_LMI1_grandparentPerc__Index1	B cells (CD19+)_GrandParentalPercentage	0.000477612	0.650884
rs1465788	C	BCell(CD19+)_LMI1_grandparentPerc__Index1	B cells (CD19+)_GrandParentalPercentage	0.000452166	0.67348
rs12444268	A	BCell(CD19+)_LMI1_grandparentPerc__Index1	B cells (CD19+)_GrandParentalPercentage	0.000512965	0.676684
rs6691977	C	BCell(CD19+)_LMI1_grandparentPerc__Index1	B cells (CD19+)_GrandParentalPercentage	-0.000460315	0.686194
rs2165738	C	BCell(CD19+)_LMI1_grandparentPerc__Index1	B cells (CD19+)_GrandParentalPercentage	0.000425092	0.706131
rs689	T	BCell(CD19+)_LMI1_grandparentPerc__Index1	B cells (CD19+)_GrandParentalPercentage	0.000472731	0.722205
rs550448	A	BCell(CD19+)_LMI1_grandparentPerc__Index1	B cells (CD19+)_GrandParentalPercentage	0.000511631	0.727923
rs17166496	G	BCell(CD19+)_LMI1_grandparentPerc__Index1	B cells (CD19+)_GrandParentalPercentage	-0.000262205	0.804936
rs2292239	T	BCell(CD19+)_LMI1_grandparentPerc__Index1	B cells (CD19+)_GrandParentalPercentage	0.000198842	0.832591
rs13415583	T	BCell(CD19+)_LMI1_grandparentPerc__Index1	B cells (CD19+)_GrandParentalPercentage	0.000210111	0.844701
rs62447205	A	BCell(CD19+)_LMI1_grandparentPerc__Index1	B cells (CD19+)_GrandParentalPercentage	-0.000199529	0.848404
rs9272346	G	BCell(CD19+)_LMI1_grandparentPerc__Index1	B cells (CD19+)_GrandParentalPercentage	-0.000148855	0.906089
rs7020673	G	BCell(CD19+)_LMI1_grandparentPerc__Index1	B cells (CD19+)_GrandParentalPercentage	9.64678e-05	0.917225
rs653178	C	BCell(CD19+)_LMI1_grandparentPerc__Index1	B cells (CD19+)_GrandParentalPercentage	9.08105e-05	0.919189
rs2290400	C	BCell(CD19+)_LMI1_grandparentPerc__Index1	B cells (CD19+)_GrandParentalPercentage	9.5584e-05	0.923891
rs2304256	C	BCell(CD19+)_LMI1_grandparentPerc__Index1	B cells (CD19+)_GrandParentalPercentage	-5.79954e-05	0.956491
rs3024505	G	BCell(CD19+)_LMI1_grandparentPerc__Index1	B cells (CD19+)_GrandParentalPercentage	-3.57556e-05	0.978798
rs478222	A	BCell(CD19+)_LMI1_grandparentPerc__Index1	B cells (CD19+)_GrandParentalPercentage	9.52123e-06	0.991276
rs56994090	T	BCell(CD19+)_LMI1_parentPerc__Index7	B cells (CD19+)_ParentalPercentage	0.0153958	0.000643383
rs11203203	A	BCell(CD19+)_LMI1_parentPerc__Index7	B cells (CD19+)_ParentalPercentage	0.0109634	0.00374097
rs193778	G	BCell(CD19+)_LMI1_parentPerc__Index7	B cells (CD19+)_ParentalPercentage	-0.00835972	0.0399611
rs924043	C	BCell(CD19+)_LMI1_parentPerc__Index7	B cells (CD19+)_ParentalPercentage	-0.0109531	0.0462421
rs3087243	G	BCell(CD19+)_LMI1_parentPerc__Index7	B cells (CD19+)_ParentalPercentage	0.00763194	0.0489006
rs12927355	C	BCell(CD19+)_LMI1_parentPerc__Index7	B cells (CD19+)_ParentalPercentage	0.00762454	0.0550713
rs2476601	A	BCell(CD19+)_LMI1_parentPerc__Index7	B cells (CD19+)_ParentalPercentage	0.00819274	0.086216
rs4900384	G	BCell(CD19+)_LMI1_parentPerc__Index7	B cells (CD19+)_ParentalPercentage	0.00696467	0.0949836
rs72727394	T	BCell(CD19+)_LMI1_parentPerc__Index7	B cells (CD19+)_ParentalPercentage	-0.00728415	0.107146
rs516246	T	BCell(CD19+)_LMI1_parentPerc__Index7	B cells (CD19+)_ParentalPercentage	0.00566266	0.114539
rs689	T	BCell(CD19+)_LMI1_parentPerc__Index7	B cells (CD19+)_ParentalPercentage	0.00819554	0.123564
rs425105	T	BCell(CD19+)_LMI1_parentPerc__Index7	B cells (CD19+)_ParentalPercentage	-0.00760511	0.152271
rs11258747	T	BCell(CD19+)_LMI1_parentPerc__Index7	B cells (CD19+)_ParentalPercentage	0.00593287	0.160398
rs11574435	C	BCell(CD19+)_LMI1_parentPerc__Index7	B cells (CD19+)_ParentalPercentage	-0.00980906	0.171505
rs539514	T	BCell(CD19+)_LMI1_parentPerc__Index7	B cells (CD19+)_ParentalPercentage	-0.00500936	0.180214
rs7804356	T	BCell(CD19+)_LMI1_parentPerc__Index7	B cells (CD19+)_ParentalPercentage	-0.00567388	0.196334
rs4505848	G	BCell(CD19+)_LMI1_parentPerc__Index7	B cells (CD19+)_ParentalPercentage	0.00417079	0.253148
rs2165738	C	BCell(CD19+)_LMI1_parentPerc__Index7	B cells (CD19+)_ParentalPercentage	-0.00445563	0.324234
rs1052553	A	BCell(CD19+)_LMI1_parentPerc__Index7	B cells (CD19+)_ParentalPercentage	-0.00437877	0.336563
rs229533	C	BCell(CD19+)_LMI1_parentPerc__Index7	B cells (CD19+)_ParentalPercentage	0.00349977	0.368759
rs4763879	A	BCell(CD19+)_LMI1_parentPerc__Index7	B cells (CD19+)_ParentalPercentage	0.0031393	0.392387
rs947474	A	BCell(CD19+)_LMI1_parentPerc__Index7	B cells (CD19+)_ParentalPercentage	0.00377673	0.394697
rs2304256	C	BCell(CD19+)_LMI1_parentPerc__Index7	B cells (CD19+)_ParentalPercentage	-0.0035455	0.405522
rs2269241	C	BCell(CD19+)_LMI1_parentPerc__Index7	B cells (CD19+)_ParentalPercentage	0.00460505	0.407918
rs3825932	T	BCell(CD19+)_LMI1_parentPerc__Index7	B cells (CD19+)_ParentalPercentage	-0.00324611	0.409928
rs13415583	T	BCell(CD19+)_LMI1_parentPerc__Index7	B cells (CD19+)_ParentalPercentage	-0.00333576	0.438069
rs2292239	T	BCell(CD19+)_LMI1_parentPerc__Index7	B cells (CD19+)_ParentalPercentage	0.00290384	0.441467
rs10137082	C	BCell(CD19+)_LMI1_parentPerc__Index7	B cells (CD19+)_ParentalPercentage	-0.00319572	0.453507
rs4849135	G	BCell(CD19+)_LMI1_parentPerc__Index7	B cells (CD19+)_ParentalPercentage	-0.00308986	0.459541
rs3024505	G	BCell(CD19+)_LMI1_parentPerc__Index7	B cells (CD19+)_ParentalPercentage	0.00393473	0.465869
rs7202877	G	BCell(CD19+)_LMI1_parentPerc__Index7	B cells (CD19+)_ParentalPercentage	0.00419209	0.47198
rs9388489	G	BCell(CD19+)_LMI1_parentPerc__Index7	B cells (CD19+)_ParentalPercentage	0.00256961	0.476631
rs6547853	G	BCell(CD19+)_LMI1_parentPerc__Index7	B cells (CD19+)_ParentalPercentage	-0.00254116	0.485774
rs6518350	A	BCell(CD19+)_LMI1_parentPerc__Index7	B cells (CD19+)_ParentalPercentage	0.00363053	0.495383
rs5753037	T	BCell(CD19+)_LMI1_parentPerc__Index7	B cells (CD19+)_ParentalPercentage	-0.00253058	0.514213
rs550448	A	BCell(CD19+)_LMI1_parentPerc__Index7	B cells (CD19+)_ParentalPercentage	0.00346226	0.557347
rs2281808	C	BCell(CD19+)_LMI1_parentPerc__Index7	B cells (CD19+)_ParentalPercentage	0.0023121	0.564364
rs10517086	A	BCell(CD19+)_LMI1_parentPerc__Index7	B cells (CD19+)_ParentalPercentage	0.00220168	0.573263
rs1465788	C	BCell(CD19+)_LMI1_parentPerc__Index7	B cells (CD19+)_ParentalPercentage	-0.0023252	0.589183
rs16956936	C	BCell(CD19+)_LMI1_parentPerc__Index7	B cells (CD19+)_ParentalPercentage	0.00288972	0.628933
rs2290400	C	BCell(CD19+)_LMI1_parentPerc__Index7	B cells (CD19+)_ParentalPercentage	0.00187456	0.640515
rs12444268	A	BCell(CD19+)_LMI1_parentPerc__Index7	B cells (CD19+)_ParentalPercentage	0.00228337	0.643691
rs1990760	T	BCell(CD19+)_LMI1_parentPerc__Index7	B cells (CD19+)_ParentalPercentage	-0.00174996	0.658748
rs1534422	G	BCell(CD19+)_LMI1_parentPerc__Index7	B cells (CD19+)_ParentalPercentage	-0.00160928	0.692636
rs9272346	G	BCell(CD19+)_LMI1_parentPerc__Index7	B cells (CD19+)_ParentalPercentage	0.00186035	0.713283
rs10509540	T	BCell(CD19+)_LMI1_parentPerc__Index7	B cells (CD19+)_ParentalPercentage	0.00143811	0.713467
rs653178	C	BCell(CD19+)_LMI1_parentPerc__Index7	B cells (CD19+)_ParentalPercentage	-0.00121675	0.73478
rs12679857	A	BCell(CD19+)_LMI1_parentPerc__Index7	B cells (CD19+)_ParentalPercentage	0.00135964	0.736059
rs2611215	A	BCell(CD19+)_LMI1_parentPerc__Index7	B cells (CD19+)_ParentalPercentage	0.00149627	0.747172
rs10786436	T	BCell(CD19+)_LMI1_parentPerc__Index7	B cells (CD19+)_ParentalPercentage	0.0013066	0.753131
rs6691977	C	BCell(CD19+)_LMI1_parentPerc__Index7	B cells (CD19+)_ParentalPercentage	0.00135085	0.767674
rs72928038	A	BCell(CD19+)_LMI1_parentPerc__Index7	B cells (CD19+)_ParentalPercentage	0.0012375	0.810044
rs1983853	C	BCell(CD19+)_LMI1_parentPerc__Index7	B cells (CD19+)_ParentalPercentage	0.00159305	0.824916
rs17166496	G	BCell(CD19+)_LMI1_parentPerc__Index7	B cells (CD19+)_ParentalPercentage	0.000598754	0.888249
rs1893217	G	BCell(CD19+)_LMI1_parentPerc__Index7	B cells (CD19+)_ParentalPercentage	0.000642172	0.889734
rs9585056	C	BCell(CD19+)_LMI1_parentPerc__Index7	B cells (CD19+)_ParentalPercentage	-0.00061473	0.890131
rs62447205	A	BCell(CD19+)_LMI1_parentPerc__Index7	B cells (CD19+)_ParentalPercentage	0.000556067	0.894396
rs10795791	G	BCell(CD19+)_LMI1_parentPerc__Index7	B cells (CD19+)_ParentalPercentage	-0.000490827	0.900153
rs11954020	G	BCell(CD19+)_LMI1_parentPerc__Index7	B cells (CD19+)_ParentalPercentage	-0.000426495	0.909346
rs478222	A	BCell(CD19+)_LMI1_parentPerc__Index7	B cells (CD19+)_ParentalPercentage	0.00036978	0.915729
rs7020673	G	BCell(CD19+)_LMI1_parentPerc__Index7	B cells (CD19+)_ParentalPercentage	-0.000376677	0.919454
rs4788084	C	BCell(CD19+)_LMI1_parentPerc__Index7	B cells (CD19+)_ParentalPercentage	0.000173786	0.963504
rs1615504	T	BCell(CD19+)_LMI1_parentPerc__Index7	B cells (CD19+)_ParentalPercentage	-6.31199e-05	0.98767
rs10137082	C	CCR6+Th1_T4RA-CD25-CCR6+183+194-_LMI6_grandparentPerc__Index115	Thelper1 CCR6+CXCR3+CCR4-_GrandParentalPercentage	-0.0095092	0.0407132
rs550448	A	CCR6+Th1_T4RA-CD25-CCR6+183+194-_LMI6_grandparentPerc__Index115	Thelper1 CCR6+CXCR3+CCR4-_GrandParentalPercentage	-0.012156	0.0588487
rs7202877	G	CCR6+Th1_T4RA-CD25-CCR6+183+194-_LMI6_grandparentPerc__Index115	Thelper1 CCR6+CXCR3+CCR4-_GrandParentalPercentage	-0.011102	0.0809196
rs11203203	A	CCR6+Th1_T4RA-CD25-CCR6+183+194-_LMI6_grandparentPerc__Index115	Thelper1 CCR6+CXCR3+CCR4-_GrandParentalPercentage	-0.00697154	0.0943783
rs4505848	G	CCR6+Th1_T4RA-CD25-CCR6+183+194-_LMI6_grandparentPerc__Index115	Thelper1 CCR6+CXCR3+CCR4-_GrandParentalPercentage	0.00658456	0.0987747
rs10795791	G	CCR6+Th1_T4RA-CD25-CCR6+183+194-_LMI6_grandparentPerc__Index115	Thelper1 CCR6+CXCR3+CCR4-_GrandParentalPercentage	0.00697977	0.102028
rs3825932	T	CCR6+Th1_T4RA-CD25-CCR6+183+194-_LMI6_grandparentPerc__Index115	Thelper1 CCR6+CXCR3+CCR4-_GrandParentalPercentage	0.00663518	0.123128
rs72928038	A	CCR6+Th1_T4RA-CD25-CCR6+183+194-_LMI6_grandparentPerc__Index115	Thelper1 CCR6+CXCR3+CCR4-_GrandParentalPercentage	0.00843253	0.133567
rs2269241	C	CCR6+Th1_T4RA-CD25-CCR6+183+194-_LMI6_grandparentPerc__Index115	Thelper1 CCR6+CXCR3+CCR4-_GrandParentalPercentage	-0.0088263	0.146663
rs9388489	G	CCR6+Th1_T4RA-CD25-CCR6+183+194-_LMI6_grandparentPerc__Index115	Thelper1 CCR6+CXCR3+CCR4-_GrandParentalPercentage	-0.00565158	0.151966
rs1983853	C	CCR6+Th1_T4RA-CD25-CCR6+183+194-_LMI6_grandparentPerc__Index115	Thelper1 CCR6+CXCR3+CCR4-_GrandParentalPercentage	-0.0110806	0.158854
rs1893217	G	CCR6+Th1_T4RA-CD25-CCR6+183+194-_LMI6_grandparentPerc__Index115	Thelper1 CCR6+CXCR3+CCR4-_GrandParentalPercentage	-0.00689569	0.172895
rs193778	G	CCR6+Th1_T4RA-CD25-CCR6+183+194-_LMI6_grandparentPerc__Index115	Thelper1 CCR6+CXCR3+CCR4-_GrandParentalPercentage	-0.00597763	0.180957
rs6547853	G	CCR6+Th1_T4RA-CD25-CCR6+183+194-_LMI6_grandparentPerc__Index115	Thelper1 CCR6+CXCR3+CCR4-_GrandParentalPercentage	0.00485895	0.222849
rs653178	C	CCR6+Th1_T4RA-CD25-CCR6+183+194-_LMI6_grandparentPerc__Index115	Thelper1 CCR6+CXCR3+CCR4-_GrandParentalPercentage	-0.00475508	0.225752
rs12444268	A	CCR6+Th1_T4RA-CD25-CCR6+183+194-_LMI6_grandparentPerc__Index115	Thelper1 CCR6+CXCR3+CCR4-_GrandParentalPercentage	-0.00650198	0.228216
rs4900384	G	CCR6+Th1_T4RA-CD25-CCR6+183+194-_LMI6_grandparentPerc__Index115	Thelper1 CCR6+CXCR3+CCR4-_GrandParentalPercentage	0.00484862	0.289288
rs11954020	G	CCR6+Th1_T4RA-CD25-CCR6+183+194-_LMI6_grandparentPerc__Index115	Thelper1 CCR6+CXCR3+CCR4-_GrandParentalPercentage	0.00429304	0.294475
rs229533	C	CCR6+Th1_T4RA-CD25-CCR6+183+194-_LMI6_grandparentPerc__Index115	Thelper1 CCR6+CXCR3+CCR4-_GrandParentalPercentage	-0.00403022	0.344361
rs7020673	G	CCR6+Th1_T4RA-CD25-CCR6+183+194-_LMI6_grandparentPerc__Index115	Thelper1 CCR6+CXCR3+CCR4-_GrandParentalPercentage	0.00378462	0.352858
rs4849135	G	CCR6+Th1_T4RA-CD25-CCR6+183+194-_LMI6_grandparentPerc__Index115	Thelper1 CCR6+CXCR3+CCR4-_GrandParentalPercentage	-0.00414389	0.364731
rs2304256	C	CCR6+Th1_T4RA-CD25-CCR6+183+194-_LMI6_grandparentPerc__Index115	Thelper1 CCR6+CXCR3+CCR4-_GrandParentalPercentage	0.00416587	0.371909
rs1052553	A	CCR6+Th1_T4RA-CD25-CCR6+183+194-_LMI6_grandparentPerc__Index115	Thelper1 CCR6+CXCR3+CCR4-_GrandParentalPercentage	0.00431824	0.386754
rs10509540	T	CCR6+Th1_T4RA-CD25-CCR6+183+194-_LMI6_grandparentPerc__Index115	Thelper1 CCR6+CXCR3+CCR4-_GrandParentalPercentage	0.00369155	0.388866
rs5753037	T	CCR6+Th1_T4RA-CD25-CCR6+183+194-_LMI6_grandparentPerc__Index115	Thelper1 CCR6+CXCR3+CCR4-_GrandParentalPercentage	0.00348109	0.412265
rs1465788	C	CCR6+Th1_T4RA-CD25-CCR6+183+194-_LMI6_grandparentPerc__Index115	Thelper1 CCR6+CXCR3+CCR4-_GrandParentalPercentage	-0.00366101	0.437165
rs9585056	C	CCR6+Th1_T4RA-CD25-CCR6+183+194-_LMI6_grandparentPerc__Index115	Thelper1 CCR6+CXCR3+CCR4-_GrandParentalPercentage	-0.00368347	0.449277
rs6518350	A	CCR6+Th1_T4RA-CD25-CCR6+183+194-_LMI6_grandparentPerc__Index115	Thelper1 CCR6+CXCR3+CCR4-_GrandParentalPercentage	-0.00437094	0.453322
rs16956936	C	CCR6+Th1_T4RA-CD25-CCR6+183+194-_LMI6_grandparentPerc__Index115	Thelper1 CCR6+CXCR3+CCR4-_GrandParentalPercentage	0.0048784	0.455973
rs3087243	G	CCR6+Th1_T4RA-CD25-CCR6+183+194-_LMI6_grandparentPerc__Index115	Thelper1 CCR6+CXCR3+CCR4-_GrandParentalPercentage	0.00315438	0.458941
rs1534422	G	CCR6+Th1_T4RA-CD25-CCR6+183+194-_LMI6_grandparentPerc__Index115	Thelper1 CCR6+CXCR3+CCR4-_GrandParentalPercentage	0.00325176	0.465421
rs17166496	G	CCR6+Th1_T4RA-CD25-CCR6+183+194-_LMI6_grandparentPerc__Index115	Thelper1 CCR6+CXCR3+CCR4-_GrandParentalPercentage	0.00332109	0.476215
rs2281808	C	CCR6+Th1_T4RA-CD25-CCR6+183+194-_LMI6_grandparentPerc__Index115	Thelper1 CCR6+CXCR3+CCR4-_GrandParentalPercentage	0.00308686	0.482011
rs539514	T	CCR6+Th1_T4RA-CD25-CCR6+183+194-_LMI6_grandparentPerc__Index115	Thelper1 CCR6+CXCR3+CCR4-_GrandParentalPercentage	-0.00270415	0.509422
rs2292239	T	CCR6+Th1_T4RA-CD25-CCR6+183+194-_LMI6_grandparentPerc__Index115	Thelper1 CCR6+CXCR3+CCR4-_GrandParentalPercentage	-0.00269128	0.514709
rs2165738	C	CCR6+Th1_T4RA-CD25-CCR6+183+194-_LMI6_grandparentPerc__Index115	Thelper1 CCR6+CXCR3+CCR4-_GrandParentalPercentage	0.00281573	0.569608
rs4788084	C	CCR6+Th1_T4RA-CD25-CCR6+183+194-_LMI6_grandparentPerc__Index115	Thelper1 CCR6+CXCR3+CCR4-_GrandParentalPercentage	-0.00226849	0.585202
rs10517086	A	CCR6+Th1_T4RA-CD25-CCR6+183+194-_LMI6_grandparentPerc__Index115	Thelper1 CCR6+CXCR3+CCR4-_GrandParentalPercentage	0.00230694	0.589815
rs3024505	G	CCR6+Th1_T4RA-CD25-CCR6+183+194-_LMI6_grandparentPerc__Index115	Thelper1 CCR6+CXCR3+CCR4-_GrandParentalPercentage	-0.00308912	0.601108
rs11574435	C	CCR6+Th1_T4RA-CD25-CCR6+183+194-_LMI6_grandparentPerc__Index115	Thelper1 CCR6+CXCR3+CCR4-_GrandParentalPercentage	0.00336475	0.668947
rs478222	A	CCR6+Th1_T4RA-CD25-CCR6+183+194-_LMI6_grandparentPerc__Index115	Thelper1 CCR6+CXCR3+CCR4-_GrandParentalPercentage	0.00146906	0.700924
rs2290400	C	CCR6+Th1_T4RA-CD25-CCR6+183+194-_LMI6_grandparentPerc__Index115	Thelper1 CCR6+CXCR3+CCR4-_GrandParentalPercentage	-0.00156563	0.721662
rs924043	C	CCR6+Th1_T4RA-CD25-CCR6+183+194-_LMI6_grandparentPerc__Index115	Thelper1 CCR6+CXCR3+CCR4-_GrandParentalPercentage	0.00202211	0.737948
rs62447205	A	CCR6+Th1_T4RA-CD25-CCR6+183+194-_LMI6_grandparentPerc__Index115	Thelper1 CCR6+CXCR3+CCR4-_GrandParentalPercentage	0.00147346	0.747949
rs10786436	T	CCR6+Th1_T4RA-CD25-CCR6+183+194-_LMI6_grandparentPerc__Index115	Thelper1 CCR6+CXCR3+CCR4-_GrandParentalPercentage	0.00136889	0.763416
rs7804356	T	CCR6+Th1_T4RA-CD25-CCR6+183+194-_LMI6_grandparentPerc__Index115	Thelper1 CCR6+CXCR3+CCR4-_GrandParentalPercentage	-0.00137312	0.775577
rs689	T	CCR6+Th1_T4RA-CD25-CCR6+183+194-_LMI6_grandparentPerc__Index115	Thelper1 CCR6+CXCR3+CCR4-_GrandParentalPercentage	0.0015811	0.786668
rs947474	A	CCR6+Th1_T4RA-CD25-CCR6+183+194-_LMI6_grandparentPerc__Index115	Thelper1 CCR6+CXCR3+CCR4-_GrandParentalPercentage	-0.00113597	0.815244
rs11258747	T	CCR6+Th1_T4RA-CD25-CCR6+183+194-_LMI6_grandparentPerc__Index115	Thelper1 CCR6+CXCR3+CCR4-_GrandParentalPercentage	0.00096379	0.835368
rs4763879	A	CCR6+Th1_T4RA-CD25-CCR6+183+194-_LMI6_grandparentPerc__Index115	Thelper1 CCR6+CXCR3+CCR4-_GrandParentalPercentage	0.000786071	0.845024
rs516246	T	CCR6+Th1_T4RA-CD25-CCR6+183+194-_LMI6_grandparentPerc__Index115	Thelper1 CCR6+CXCR3+CCR4-_GrandParentalPercentage	0.000760012	0.84703
rs425105	T	CCR6+Th1_T4RA-CD25-CCR6+183+194-_LMI6_grandparentPerc__Index115	Thelper1 CCR6+CXCR3+CCR4-_GrandParentalPercentage	0.00109797	0.850612
rs72727394	T	CCR6+Th1_T4RA-CD25-CCR6+183+194-_LMI6_grandparentPerc__Index115	Thelper1 CCR6+CXCR3+CCR4-_GrandParentalPercentage	0.00083738	0.866058
rs9272346	G	CCR6+Th1_T4RA-CD25-CCR6+183+194-_LMI6_grandparentPerc__Index115	Thelper1 CCR6+CXCR3+CCR4-_GrandParentalPercentage	0.000922742	0.86779
rs13415583	T	CCR6+Th1_T4RA-CD25-CCR6+183+194-_LMI6_grandparentPerc__Index115	Thelper1 CCR6+CXCR3+CCR4-_GrandParentalPercentage	-0.000752987	0.873046
rs1990760	T	CCR6+Th1_T4RA-CD25-CCR6+183+194-_LMI6_grandparentPerc__Index115	Thelper1 CCR6+CXCR3+CCR4-_GrandParentalPercentage	0.000621009	0.886183
rs2611215	A	CCR6+Th1_T4RA-CD25-CCR6+183+194-_LMI6_grandparentPerc__Index115	Thelper1 CCR6+CXCR3+CCR4-_GrandParentalPercentage	-0.000534075	0.916297
rs12679857	A	CCR6+Th1_T4RA-CD25-CCR6+183+194-_LMI6_grandparentPerc__Index115	Thelper1 CCR6+CXCR3+CCR4-_GrandParentalPercentage	-0.000414402	0.925239
rs1615504	T	CCR6+Th1_T4RA-CD25-CCR6+183+194-_LMI6_grandparentPerc__Index115	Thelper1 CCR6+CXCR3+CCR4-_GrandParentalPercentage	-0.000417436	0.925619
rs2476601	A	CCR6+Th1_T4RA-CD25-CCR6+183+194-_LMI6_grandparentPerc__Index115	Thelper1 CCR6+CXCR3+CCR4-_GrandParentalPercentage	-0.000370937	0.94363
rs12927355	C	CCR6+Th1_T4RA-CD25-CCR6+183+194-_LMI6_grandparentPerc__Index115	Thelper1 CCR6+CXCR3+CCR4-_GrandParentalPercentage	-0.000265197	0.951614
rs56994090	T	CCR6+Th1_T4RA-CD25-CCR6+183+194-_LMI6_grandparentPerc__Index115	Thelper1 CCR6+CXCR3+CCR4-_GrandParentalPercentage	0.000218951	0.965131
rs6691977	C	CCR6+Th1_T4RA-CD25-CCR6+183+194-_LMI6_grandparentPerc__Index115	Thelper1 CCR6+CXCR3+CCR4-_GrandParentalPercentage	0.0001081	0.982773
rs550448	A	CCR6+Th1_T4RA-CD25-CCR6+183+194-_LMI6_parentPerc__Index120	Thelper1 CCR6+CXCR3+CCR4-_ParentalPercentage	-0.034451	0.00877871
rs193778	G	CCR6+Th1_T4RA-CD25-CCR6+183+194-_LMI6_parentPerc__Index120	Thelper1 CCR6+CXCR3+CCR4-_ParentalPercentage	-0.0174849	0.0558927
rs11203203	A	CCR6+Th1_T4RA-CD25-CCR6+183+194-_LMI6_parentPerc__Index120	Thelper1 CCR6+CXCR3+CCR4-_ParentalPercentage	-0.0152818	0.0737315
rs10137082	C	CCR6+Th1_T4RA-CD25-CCR6+183+194-_LMI6_parentPerc__Index120	Thelper1 CCR6+CXCR3+CCR4-_ParentalPercentage	-0.0160305	0.093166
rs3825932	T	CCR6+Th1_T4RA-CD25-CCR6+183+194-_LMI6_parentPerc__Index120	Thelper1 CCR6+CXCR3+CCR4-_ParentalPercentage	0.0135927	0.123648
rs12444268	A	CCR6+Th1_T4RA-CD25-CCR6+183+194-_LMI6_parentPerc__Index120	Thelper1 CCR6+CXCR3+CCR4-_ParentalPercentage	-0.016843	0.127711
rs62447205	A	CCR6+Th1_T4RA-CD25-CCR6+183+194-_LMI6_parentPerc__Index120	Thelper1 CCR6+CXCR3+CCR4-_ParentalPercentage	0.0128768	0.170093
rs653178	C	CCR6+Th1_T4RA-CD25-CCR6+183+194-_LMI6_parentPerc__Index120	Thelper1 CCR6+CXCR3+CCR4-_ParentalPercentage	-0.0108188	0.178922
rs7020673	G	CCR6+Th1_T4RA-CD25-CCR6+183+194-_LMI6_parentPerc__Index120	Thelper1 CCR6+CXCR3+CCR4-_ParentalPercentage	0.0107988	0.195834
rs2165738	C	CCR6+Th1_T4RA-CD25-CCR6+183+194-_LMI6_parentPerc__Index120	Thelper1 CCR6+CXCR3+CCR4-_ParentalPercentage	0.0130489	0.198215
rs4849135	G	CCR6+Th1_T4RA-CD25-CCR6+183+194-_LMI6_parentPerc__Index120	Thelper1 CCR6+CXCR3+CCR4-_ParentalPercentage	-0.0115939	0.215995
rs4505848	G	CCR6+Th1_T4RA-CD25-CCR6+183+194-_LMI6_parentPerc__Index120	Thelper1 CCR6+CXCR3+CCR4-_ParentalPercentage	0.00982052	0.230784
rs6547853	G	CCR6+Th1_T4RA-CD25-CCR6+183+194-_LMI6_parentPerc__Index120	Thelper1 CCR6+CXCR3+CCR4-_ParentalPercentage	0.00968844	0.236128
rs6518350	A	CCR6+Th1_T4RA-CD25-CCR6+183+194-_LMI6_parentPerc__Index120	Thelper1 CCR6+CXCR3+CCR4-_ParentalPercentage	-0.0141382	0.236572
rs16956936	C	CCR6+Th1_T4RA-CD25-CCR6+183+194-_LMI6_parentPerc__Index120	Thelper1 CCR6+CXCR3+CCR4-_ParentalPercentage	0.014953	0.264925
rs2611215	A	CCR6+Th1_T4RA-CD25-CCR6+183+194-_LMI6_parentPerc__Index120	Thelper1 CCR6+CXCR3+CCR4-_ParentalPercentage	-0.0115588	0.266804
rs11954020	G	CCR6+Th1_T4RA-CD25-CCR6+183+194-_LMI6_parentPerc__Index120	Thelper1 CCR6+CXCR3+CCR4-_ParentalPercentage	0.00900925	0.283484
rs72928038	A	CCR6+Th1_T4RA-CD25-CCR6+183+194-_LMI6_parentPerc__Index120	Thelper1 CCR6+CXCR3+CCR4-_ParentalPercentage	0.0118595	0.304417
rs7202877	G	CCR6+Th1_T4RA-CD25-CCR6+183+194-_LMI6_parentPerc__Index120	Thelper1 CCR6+CXCR3+CCR4-_ParentalPercentage	-0.0134097	0.30527
rs2281808	C	CCR6+Th1_T4RA-CD25-CCR6+183+194-_LMI6_parentPerc__Index120	Thelper1 CCR6+CXCR3+CCR4-_ParentalPercentage	0.00910418	0.311794
rs4763879	A	CCR6+Th1_T4RA-CD25-CCR6+183+194-_LMI6_parentPerc__Index120	Thelper1 CCR6+CXCR3+CCR4-_ParentalPercentage	0.00820412	0.319425
rs229533	C	CCR6+Th1_T4RA-CD25-CCR6+183+194-_LMI6_parentPerc__Index120	Thelper1 CCR6+CXCR3+CCR4-_ParentalPercentage	-0.00847656	0.332278
rs1983853	C	CCR6+Th1_T4RA-CD25-CCR6+183+194-_LMI6_parentPerc__Index120	Thelper1 CCR6+CXCR3+CCR4-_ParentalPercentage	-0.015617	0.333661
rs10795791	G	CCR6+Th1_T4RA-CD25-CCR6+183+194-_LMI6_parentPerc__Index120	Thelper1 CCR6+CXCR3+CCR4-_ParentalPercentage	0.00802475	0.360525
rs4900384	G	CCR6+Th1_T4RA-CD25-CCR6+183+194-_LMI6_parentPerc__Index120	Thelper1 CCR6+CXCR3+CCR4-_ParentalPercentage	0.00787372	0.401789
rs1893217	G	CCR6+Th1_T4RA-CD25-CCR6+183+194-_LMI6_parentPerc__Index120	Thelper1 CCR6+CXCR3+CCR4-_ParentalPercentage	-0.00699528	0.50104
rs10786436	T	CCR6+Th1_T4RA-CD25-CCR6+183+194-_LMI6_parentPerc__Index120	Thelper1 CCR6+CXCR3+CCR4-_ParentalPercentage	0.00622963	0.504118
rs2476601	A	CCR6+Th1_T4RA-CD25-CCR6+183+194-_LMI6_parentPerc__Index120	Thelper1 CCR6+CXCR3+CCR4-_ParentalPercentage	-0.00714212	0.506682
rs478222	A	CCR6+Th1_T4RA-CD25-CCR6+183+194-_LMI6_parentPerc__Index120	Thelper1 CCR6+CXCR3+CCR4-_ParentalPercentage	0.00514784	0.511636
rs1052553	A	CCR6+Th1_T4RA-CD25-CCR6+183+194-_LMI6_parentPerc__Index120	Thelper1 CCR6+CXCR3+CCR4-_ParentalPercentage	0.00658108	0.520388
rs2304256	C	CCR6+Th1_T4RA-CD25-CCR6+183+194-_LMI6_parentPerc__Index120	Thelper1 CCR6+CXCR3+CCR4-_ParentalPercentage	0.00607594	0.525734
rs3024505	G	CCR6+Th1_T4RA-CD25-CCR6+183+194-_LMI6_parentPerc__Index120	Thelper1 CCR6+CXCR3+CCR4-_ParentalPercentage	-0.00726259	0.54902
rs425105	T	CCR6+Th1_T4RA-CD25-CCR6+183+194-_LMI6_parentPerc__Index120	Thelper1 CCR6+CXCR3+CCR4-_ParentalPercentage	0.00711371	0.551806
rs3087243	G	CCR6+Th1_T4RA-CD25-CCR6+183+194-_LMI6_parentPerc__Index120	Thelper1 CCR6+CXCR3+CCR4-_ParentalPercentage	0.00493624	0.572214
rs924043	C	CCR6+Th1_T4RA-CD25-CCR6+183+194-_LMI6_parentPerc__Index120	Thelper1 CCR6+CXCR3+CCR4-_ParentalPercentage	0.00641021	0.605076
rs11258747	T	CCR6+Th1_T4RA-CD25-CCR6+183+194-_LMI6_parentPerc__Index120	Thelper1 CCR6+CXCR3+CCR4-_ParentalPercentage	-0.00465489	0.624554
rs2269241	C	CCR6+Th1_T4RA-CD25-CCR6+183+194-_LMI6_parentPerc__Index120	Thelper1 CCR6+CXCR3+CCR4-_ParentalPercentage	-0.00591032	0.636428
rs9585056	C	CCR6+Th1_T4RA-CD25-CCR6+183+194-_LMI6_parentPerc__Index120	Thelper1 CCR6+CXCR3+CCR4-_ParentalPercentage	-0.00459729	0.645421
rs947474	A	CCR6+Th1_T4RA-CD25-CCR6+183+194-_LMI6_parentPerc__Index120	Thelper1 CCR6+CXCR3+CCR4-_ParentalPercentage	0.00449831	0.651892
rs9388489	G	CCR6+Th1_T4RA-CD25-CCR6+183+194-_LMI6_parentPerc__Index120	Thelper1 CCR6+CXCR3+CCR4-_ParentalPercentage	-0.00353484	0.662971
rs7804356	T	CCR6+Th1_T4RA-CD25-CCR6+183+194-_LMI6_parentPerc__Index120	Thelper1 CCR6+CXCR3+CCR4-_ParentalPercentage	-0.00419839	0.67086
rs689	T	CCR6+Th1_T4RA-CD25-CCR6+183+194-_LMI6_parentPerc__Index120	Thelper1 CCR6+CXCR3+CCR4-_ParentalPercentage	0.00496726	0.67849
rs539514	T	CCR6+Th1_T4RA-CD25-CCR6+183+194-_LMI6_parentPerc__Index120	Thelper1 CCR6+CXCR3+CCR4-_ParentalPercentage	0.00347728	0.6793
rs11574435	C	CCR6+Th1_T4RA-CD25-CCR6+183+194-_LMI6_parentPerc__Index120	Thelper1 CCR6+CXCR3+CCR4-_ParentalPercentage	0.0065859	0.683292
rs9272346	G	CCR6+Th1_T4RA-CD25-CCR6+183+194-_LMI6_parentPerc__Index120	Thelper1 CCR6+CXCR3+CCR4-_ParentalPercentage	-0.0045853	0.686723
rs6691977	C	CCR6+Th1_T4RA-CD25-CCR6+183+194-_LMI6_parentPerc__Index120	Thelper1 CCR6+CXCR3+CCR4-_ParentalPercentage	0.00409385	0.690111
rs10517086	A	CCR6+Th1_T4RA-CD25-CCR6+183+194-_LMI6_parentPerc__Index120	Thelper1 CCR6+CXCR3+CCR4-_ParentalPercentage	-0.00324589	0.711613
rs1465788	C	CCR6+Th1_T4RA-CD25-CCR6+183+194-_LMI6_parentPerc__Index120	Thelper1 CCR6+CXCR3+CCR4-_ParentalPercentage	-0.00318644	0.741804
rs5753037	T	CCR6+Th1_T4RA-CD25-CCR6+183+194-_LMI6_parentPerc__Index120	Thelper1 CCR6+CXCR3+CCR4-_ParentalPercentage	0.0028468	0.743944
rs516246	T	CCR6+Th1_T4RA-CD25-CCR6+183+194-_LMI6_parentPerc__Index120	Thelper1 CCR6+CXCR3+CCR4-_ParentalPercentage	-0.00257853	0.749674
rs17166496	G	CCR6+Th1_T4RA-CD25-CCR6+183+194-_LMI6_parentPerc__Index120	Thelper1 CCR6+CXCR3+CCR4-_ParentalPercentage	0.00300114	0.753776
rs13415583	T	CCR6+Th1_T4RA-CD25-CCR6+183+194-_LMI6_parentPerc__Index120	Thelper1 CCR6+CXCR3+CCR4-_ParentalPercentage	-0.00298608	0.757381
rs10509540	T	CCR6+Th1_T4RA-CD25-CCR6+183+194-_LMI6_parentPerc__Index120	Thelper1 CCR6+CXCR3+CCR4-_ParentalPercentage	0.00238271	0.78647
rs1534422	G	CCR6+Th1_T4RA-CD25-CCR6+183+194-_LMI6_parentPerc__Index120	Thelper1 CCR6+CXCR3+CCR4-_ParentalPercentage	0.00233758	0.798222
rs56994090	T	CCR6+Th1_T4RA-CD25-CCR6+183+194-_LMI6_parentPerc__Index120	Thelper1 CCR6+CXCR3+CCR4-_ParentalPercentage	-0.00237216	0.817398
rs1615504	T	CCR6+Th1_T4RA-CD25-CCR6+183+194-_LMI6_parentPerc__Index120	Thelper1 CCR6+CXCR3+CCR4-_ParentalPercentage	-0.00199051	0.828194
rs12927355	C	CCR6+Th1_T4RA-CD25-CCR6+183+194-_LMI6_parentPerc__Index120	Thelper1 CCR6+CXCR3+CCR4-_ParentalPercentage	-0.00159436	0.85885
rs72727394	T	CCR6+Th1_T4RA-CD25-CCR6+183+194-_LMI6_parentPerc__Index120	Thelper1 CCR6+CXCR3+CCR4-_ParentalPercentage	0.001062	0.916952
rs1990760	T	CCR6+Th1_T4RA-CD25-CCR6+183+194-_LMI6_parentPerc__Index120	Thelper1 CCR6+CXCR3+CCR4-_ParentalPercentage	-0.000576648	0.948342
rs12679857	A	CCR6+Th1_T4RA-CD25-CCR6+183+194-_LMI6_parentPerc__Index120	Thelper1 CCR6+CXCR3+CCR4-_ParentalPercentage	-0.000314762	0.972284
rs2292239	T	CCR6+Th1_T4RA-CD25-CCR6+183+194-_LMI6_parentPerc__Index120	Thelper1 CCR6+CXCR3+CCR4-_ParentalPercentage	-0.000218192	0.979468
rs4788084	C	CCR6+Th1_T4RA-CD25-CCR6+183+194-_LMI6_parentPerc__Index120	Thelper1 CCR6+CXCR3+CCR4-_ParentalPercentage	-0.00011185	0.989537
rs2290400	C	CCR6+Th1_T4RA-CD25-CCR6+183+194-_LMI6_parentPerc__Index120	Thelper1 CCR6+CXCR3+CCR4-_ParentalPercentage	8.43837e-05	0.992533
rs11574435	C	CD14++CD16-_LMI1_grandparentPerc__Index1	Classical monocytes (CD14++CD16-)_GrandParentalPercentage	0.00741156	0.0230536
rs193778	G	CD14++CD16-_LMI1_grandparentPerc__Index1	Classical monocytes (CD14++CD16-)_GrandParentalPercentage	0.0036252	0.0511054
rs539514	T	CD14++CD16-_LMI1_grandparentPerc__Index1	Classical monocytes (CD14++CD16-)_GrandParentalPercentage	0.00311923	0.0670107
rs1615504	T	CD14++CD16-_LMI1_grandparentPerc__Index1	Classical monocytes (CD14++CD16-)_GrandParentalPercentage	-0.00296426	0.110744
rs6547853	G	CD14++CD16-_LMI1_grandparentPerc__Index1	Classical monocytes (CD14++CD16-)_GrandParentalPercentage	-0.00263527	0.112381
rs4763879	A	CD14++CD16-_LMI1_grandparentPerc__Index1	Classical monocytes (CD14++CD16-)_GrandParentalPercentage	-0.0023645	0.157505
rs56994090	T	CD14++CD16-_LMI1_grandparentPerc__Index1	Classical monocytes (CD14++CD16-)_GrandParentalPercentage	0.00291773	0.16137
rs425105	T	CD14++CD16-_LMI1_grandparentPerc__Index1	Classical monocytes (CD14++CD16-)_GrandParentalPercentage	-0.00336905	0.164778
rs7020673	G	CD14++CD16-_LMI1_grandparentPerc__Index1	Classical monocytes (CD14++CD16-)_GrandParentalPercentage	-0.00235489	0.165066
rs11203203	A	CD14++CD16-_LMI1_grandparentPerc__Index1	Classical monocytes (CD14++CD16-)_GrandParentalPercentage	0.00228188	0.189721
rs478222	A	CD14++CD16-_LMI1_grandparentPerc__Index1	Classical monocytes (CD14++CD16-)_GrandParentalPercentage	-0.00189764	0.233378
rs13415583	T	CD14++CD16-_LMI1_grandparentPerc__Index1	Classical monocytes (CD14++CD16-)_GrandParentalPercentage	0.00230721	0.239523
rs11258747	T	CD14++CD16-_LMI1_grandparentPerc__Index1	Classical monocytes (CD14++CD16-)_GrandParentalPercentage	-0.00222214	0.249744
rs1052553	A	CD14++CD16-_LMI1_grandparentPerc__Index1	Classical monocytes (CD14++CD16-)_GrandParentalPercentage	-0.00237732	0.252803
rs4788084	C	CD14++CD16-_LMI1_grandparentPerc__Index1	Classical monocytes (CD14++CD16-)_GrandParentalPercentage	0.00194753	0.260535
rs2304256	C	CD14++CD16-_LMI1_grandparentPerc__Index1	Classical monocytes (CD14++CD16-)_GrandParentalPercentage	0.00213594	0.271972
rs4849135	G	CD14++CD16-_LMI1_grandparentPerc__Index1	Classical monocytes (CD14++CD16-)_GrandParentalPercentage	0.00193032	0.311125
rs72727394	T	CD14++CD16-_LMI1_grandparentPerc__Index1	Classical monocytes (CD14++CD16-)_GrandParentalPercentage	-0.00201402	0.330046
rs3825932	T	CD14++CD16-_LMI1_grandparentPerc__Index1	Classical monocytes (CD14++CD16-)_GrandParentalPercentage	0.00174473	0.331733
rs947474	A	CD14++CD16-_LMI1_grandparentPerc__Index1	Classical monocytes (CD14++CD16-)_GrandParentalPercentage	0.00195662	0.333899
rs9585056	C	CD14++CD16-_LMI1_grandparentPerc__Index1	Classical monocytes (CD14++CD16-)_GrandParentalPercentage	0.00189086	0.351413
rs6518350	A	CD14++CD16-_LMI1_grandparentPerc__Index1	Classical monocytes (CD14++CD16-)_GrandParentalPercentage	-0.00216853	0.37211
rs2292239	T	CD14++CD16-_LMI1_grandparentPerc__Index1	Classical monocytes (CD14++CD16-)_GrandParentalPercentage	0.0014606	0.396249
rs10509540	T	CD14++CD16-_LMI1_grandparentPerc__Index1	Classical monocytes (CD14++CD16-)_GrandParentalPercentage	-0.00149518	0.402601
rs1990760	T	CD14++CD16-_LMI1_grandparentPerc__Index1	Classical monocytes (CD14++CD16-)_GrandParentalPercentage	-0.00147408	0.414787
rs2269241	C	CD14++CD16-_LMI1_grandparentPerc__Index1	Classical monocytes (CD14++CD16-)_GrandParentalPercentage	-0.00203153	0.423831
rs10795791	G	CD14++CD16-_LMI1_grandparentPerc__Index1	Classical monocytes (CD14++CD16-)_GrandParentalPercentage	0.00142005	0.426102
rs3024505	G	CD14++CD16-_LMI1_grandparentPerc__Index1	Classical monocytes (CD14++CD16-)_GrandParentalPercentage	0.00191536	0.436713
rs4900384	G	CD14++CD16-_LMI1_grandparentPerc__Index1	Classical monocytes (CD14++CD16-)_GrandParentalPercentage	0.00147674	0.439186
rs924043	C	CD14++CD16-_LMI1_grandparentPerc__Index1	Classical monocytes (CD14++CD16-)_GrandParentalPercentage	0.00193267	0.442864
rs16956936	C	CD14++CD16-_LMI1_grandparentPerc__Index1	Classical monocytes (CD14++CD16-)_GrandParentalPercentage	0.00204092	0.454456
rs62447205	A	CD14++CD16-_LMI1_grandparentPerc__Index1	Classical monocytes (CD14++CD16-)_GrandParentalPercentage	0.00136702	0.474378
rs17166496	G	CD14++CD16-_LMI1_grandparentPerc__Index1	Classical monocytes (CD14++CD16-)_GrandParentalPercentage	-0.00131127	0.499955
rs12444268	A	CD14++CD16-_LMI1_grandparentPerc__Index1	Classical monocytes (CD14++CD16-)_GrandParentalPercentage	-0.00151513	0.501194
rs11954020	G	CD14++CD16-_LMI1_grandparentPerc__Index1	Classical monocytes (CD14++CD16-)_GrandParentalPercentage	-0.00105109	0.538516
rs12927355	C	CD14++CD16-_LMI1_grandparentPerc__Index1	Classical monocytes (CD14++CD16-)_GrandParentalPercentage	0.00104672	0.56554
rs2611215	A	CD14++CD16-_LMI1_grandparentPerc__Index1	Classical monocytes (CD14++CD16-)_GrandParentalPercentage	-0.00118417	0.576102
rs72928038	A	CD14++CD16-_LMI1_grandparentPerc__Index1	Classical monocytes (CD14++CD16-)_GrandParentalPercentage	-0.00130507	0.578528
rs7202877	G	CD14++CD16-_LMI1_grandparentPerc__Index1	Classical monocytes (CD14++CD16-)_GrandParentalPercentage	-0.00143891	0.588692
rs4505848	G	CD14++CD16-_LMI1_grandparentPerc__Index1	Classical monocytes (CD14++CD16-)_GrandParentalPercentage	-0.000871453	0.601361
rs550448	A	CD14++CD16-_LMI1_grandparentPerc__Index1	Classical monocytes (CD14++CD16-)_GrandParentalPercentage	0.00131429	0.625592
rs1893217	G	CD14++CD16-_LMI1_grandparentPerc__Index1	Classical monocytes (CD14++CD16-)_GrandParentalPercentage	0.00102218	0.628667
rs10786436	T	CD14++CD16-_LMI1_grandparentPerc__Index1	Classical monocytes (CD14++CD16-)_GrandParentalPercentage	0.00083653	0.659064
rs2281808	C	CD14++CD16-_LMI1_grandparentPerc__Index1	Classical monocytes (CD14++CD16-)_GrandParentalPercentage	0.000796828	0.663484
rs653178	C	CD14++CD16-_LMI1_grandparentPerc__Index1	Classical monocytes (CD14++CD16-)_GrandParentalPercentage	0.00070316	0.667957
rs229533	C	CD14++CD16-_LMI1_grandparentPerc__Index1	Classical monocytes (CD14++CD16-)_GrandParentalPercentage	0.000746605	0.674665
rs7804356	T	CD14++CD16-_LMI1_grandparentPerc__Index1	Classical monocytes (CD14++CD16-)_GrandParentalPercentage	-0.000826403	0.680671
rs1465788	C	CD14++CD16-_LMI1_grandparentPerc__Index1	Classical monocytes (CD14++CD16-)_GrandParentalPercentage	-0.000758763	0.699493
rs10517086	A	CD14++CD16-_LMI1_grandparentPerc__Index1	Classical monocytes (CD14++CD16-)_GrandParentalPercentage	-0.00062313	0.726962
rs1983853	C	CD14++CD16-_LMI1_grandparentPerc__Index1	Classical monocytes (CD14++CD16-)_GrandParentalPercentage	-0.00103599	0.752601
rs2476601	A	CD14++CD16-_LMI1_grandparentPerc__Index1	Classical monocytes (CD14++CD16-)_GrandParentalPercentage	0.000670897	0.759034
rs3087243	G	CD14++CD16-_LMI1_grandparentPerc__Index1	Classical monocytes (CD14++CD16-)_GrandParentalPercentage	0.0005217	0.769065
rs6691977	C	CD14++CD16-_LMI1_grandparentPerc__Index1	Classical monocytes (CD14++CD16-)_GrandParentalPercentage	-0.000589163	0.777732
rs5753037	T	CD14++CD16-_LMI1_grandparentPerc__Index1	Classical monocytes (CD14++CD16-)_GrandParentalPercentage	0.000493839	0.780426
rs1534422	G	CD14++CD16-_LMI1_grandparentPerc__Index1	Classical monocytes (CD14++CD16-)_GrandParentalPercentage	0.00047957	0.796374
rs10137082	C	CD14++CD16-_LMI1_grandparentPerc__Index1	Classical monocytes (CD14++CD16-)_GrandParentalPercentage	-0.000441613	0.820583
rs9388489	G	CD14++CD16-_LMI1_grandparentPerc__Index1	Classical monocytes (CD14++CD16-)_GrandParentalPercentage	-0.000300569	0.855358
rs689	T	CD14++CD16-_LMI1_grandparentPerc__Index1	Classical monocytes (CD14++CD16-)_GrandParentalPercentage	-0.000257899	0.915688
rs2165738	C	CD14++CD16-_LMI1_grandparentPerc__Index1	Classical monocytes (CD14++CD16-)_GrandParentalPercentage	0.000174052	0.932844
rs516246	T	CD14++CD16-_LMI1_grandparentPerc__Index1	Classical monocytes (CD14++CD16-)_GrandParentalPercentage	-0.000126714	0.938517
rs2290400	C	CD14++CD16-_LMI1_grandparentPerc__Index1	Classical monocytes (CD14++CD16-)_GrandParentalPercentage	0.000130282	0.943329
rs12679857	A	CD14++CD16-_LMI1_grandparentPerc__Index1	Classical monocytes (CD14++CD16-)_GrandParentalPercentage	-0.000109019	0.952789
rs9272346	G	CD14++CD16-_LMI1_grandparentPerc__Index1	Classical monocytes (CD14++CD16-)_GrandParentalPercentage	-7.9178e-05	0.972672
rs193778	G	CD14++CD16-_LMI1_parentPerc__Index3	Classical monocytes (CD14++CD16-)_ParentalPercentage	0.0293626	0.00240821
rs4849135	G	CD14++CD16-_LMI1_parentPerc__Index3	Classical monocytes (CD14++CD16-)_ParentalPercentage	0.025685	0.00960894
rs4505848	G	CD14++CD16-_LMI1_parentPerc__Index3	Classical monocytes (CD14++CD16-)_ParentalPercentage	-0.0196061	0.0240619
rs7020673	G	CD14++CD16-_LMI1_parentPerc__Index3	Classical monocytes (CD14++CD16-)_ParentalPercentage	-0.0168489	0.057525
rs11203203	A	CD14++CD16-_LMI1_parentPerc__Index3	Classical monocytes (CD14++CD16-)_ParentalPercentage	0.0141877	0.119397
rs7202877	G	CD14++CD16-_LMI1_parentPerc__Index3	Classical monocytes (CD14++CD16-)_ParentalPercentage	-0.0215471	0.121344
rs425105	T	CD14++CD16-_LMI1_parentPerc__Index3	Classical monocytes (CD14++CD16-)_ParentalPercentage	-0.0196012	0.122783
rs11574435	C	CD14++CD16-_LMI1_parentPerc__Index3	Classical monocytes (CD14++CD16-)_ParentalPercentage	0.02577	0.132943
rs2304256	C	CD14++CD16-_LMI1_parentPerc__Index3	Classical monocytes (CD14++CD16-)_ParentalPercentage	0.0131328	0.197175
rs539514	T	CD14++CD16-_LMI1_parentPerc__Index3	Classical monocytes (CD14++CD16-)_ParentalPercentage	0.0108085	0.226898
rs10786436	T	CD14++CD16-_LMI1_parentPerc__Index3	Classical monocytes (CD14++CD16-)_ParentalPercentage	0.0119604	0.227959
rs9585056	C	CD14++CD16-_LMI1_parentPerc__Index3	Classical monocytes (CD14++CD16-)_ParentalPercentage	0.0123652	0.244597
rs478222	A	CD14++CD16-_LMI1_parentPerc__Index3	Classical monocytes (CD14++CD16-)_ParentalPercentage	-0.00931031	0.264629
rs924043	C	CD14++CD16-_LMI1_parentPerc__Index3	Classical monocytes (CD14++CD16-)_ParentalPercentage	0.0146731	0.265859
rs689	T	CD14++CD16-_LMI1_parentPerc__Index3	Classical monocytes (CD14++CD16-)_ParentalPercentage	0.0134672	0.290799
rs10509540	T	CD14++CD16-_LMI1_parentPerc__Index3	Classical monocytes (CD14++CD16-)_ParentalPercentage	-0.00963762	0.303015
rs653178	C	CD14++CD16-_LMI1_parentPerc__Index3	Classical monocytes (CD14++CD16-)_ParentalPercentage	0.00823794	0.33712
rs1983853	C	CD14++CD16-_LMI1_parentPerc__Index3	Classical monocytes (CD14++CD16-)_ParentalPercentage	0.0165111	0.337243
rs2165738	C	CD14++CD16-_LMI1_parentPerc__Index3	Classical monocytes (CD14++CD16-)_ParentalPercentage	-0.0101947	0.345725
rs11954020	G	CD14++CD16-_LMI1_parentPerc__Index3	Classical monocytes (CD14++CD16-)_ParentalPercentage	-0.00842777	0.346355
rs2269241	C	CD14++CD16-_LMI1_parentPerc__Index3	Classical monocytes (CD14++CD16-)_ParentalPercentage	-0.0121004	0.363198
rs10517086	A	CD14++CD16-_LMI1_parentPerc__Index3	Classical monocytes (CD14++CD16-)_ParentalPercentage	0.00845124	0.365745
rs72727394	T	CD14++CD16-_LMI1_parentPerc__Index3	Classical monocytes (CD14++CD16-)_ParentalPercentage	-0.00948779	0.381337
rs6547853	G	CD14++CD16-_LMI1_parentPerc__Index3	Classical monocytes (CD14++CD16-)_ParentalPercentage	-0.00713179	0.413322
rs1893217	G	CD14++CD16-_LMI1_parentPerc__Index3	Classical monocytes (CD14++CD16-)_ParentalPercentage	0.00876902	0.428313
rs1990760	T	CD14++CD16-_LMI1_parentPerc__Index3	Classical monocytes (CD14++CD16-)_ParentalPercentage	-0.00699122	0.46053
rs12927355	C	CD14++CD16-_LMI1_parentPerc__Index3	Classical monocytes (CD14++CD16-)_ParentalPercentage	0.00699477	0.463573
rs2292239	T	CD14++CD16-_LMI1_parentPerc__Index3	Classical monocytes (CD14++CD16-)_ParentalPercentage	0.00641682	0.477058
rs10795791	G	CD14++CD16-_LMI1_parentPerc__Index3	Classical monocytes (CD14++CD16-)_ParentalPercentage	0.00645624	0.489954
rs13415583	T	CD14++CD16-_LMI1_parentPerc__Index3	Classical monocytes (CD14++CD16-)_ParentalPercentage	0.0070883	0.490941
rs2281808	C	CD14++CD16-_LMI1_parentPerc__Index3	Classical monocytes (CD14++CD16-)_ParentalPercentage	-0.00617002	0.520151
rs7804356	T	CD14++CD16-_LMI1_parentPerc__Index3	Classical monocytes (CD14++CD16-)_ParentalPercentage	0.00599471	0.568809
rs4763879	A	CD14++CD16-_LMI1_parentPerc__Index3	Classical monocytes (CD14++CD16-)_ParentalPercentage	-0.00497803	0.570888
rs1534422	G	CD14++CD16-_LMI1_parentPerc__Index3	Classical monocytes (CD14++CD16-)_ParentalPercentage	0.00530531	0.585818
rs3825932	T	CD14++CD16-_LMI1_parentPerc__Index3	Classical monocytes (CD14++CD16-)_ParentalPercentage	0.00504871	0.59226
rs62447205	A	CD14++CD16-_LMI1_parentPerc__Index3	Classical monocytes (CD14++CD16-)_ParentalPercentage	0.00503294	0.615351
rs9388489	G	CD14++CD16-_LMI1_parentPerc__Index3	Classical monocytes (CD14++CD16-)_ParentalPercentage	-0.00398478	0.644601
rs5753037	T	CD14++CD16-_LMI1_parentPerc__Index3	Classical monocytes (CD14++CD16-)_ParentalPercentage	-0.00416062	0.65397
rs10137082	C	CD14++CD16-_LMI1_parentPerc__Index3	Classical monocytes (CD14++CD16-)_ParentalPercentage	0.00441547	0.665157
rs16956936	C	CD14++CD16-_LMI1_parentPerc__Index3	Classical monocytes (CD14++CD16-)_ParentalPercentage	0.00563295	0.693744
rs4900384	G	CD14++CD16-_LMI1_parentPerc__Index3	Classical monocytes (CD14++CD16-)_ParentalPercentage	-0.00389837	0.696917
rs4788084	C	CD14++CD16-_LMI1_parentPerc__Index3	Classical monocytes (CD14++CD16-)_ParentalPercentage	-0.00352567	0.697889
rs3024505	G	CD14++CD16-_LMI1_parentPerc__Index3	Classical monocytes (CD14++CD16-)_ParentalPercentage	0.00494129	0.701953
rs1465788	C	CD14++CD16-_LMI1_parentPerc__Index3	Classical monocytes (CD14++CD16-)_ParentalPercentage	0.00365385	0.722806
rs56994090	T	CD14++CD16-_LMI1_parentPerc__Index3	Classical monocytes (CD14++CD16-)_ParentalPercentage	-0.00361933	0.740812
rs6518350	A	CD14++CD16-_LMI1_parentPerc__Index3	Classical monocytes (CD14++CD16-)_ParentalPercentage	0.00372217	0.770212
rs229533	C	CD14++CD16-_LMI1_parentPerc__Index3	Classical monocytes (CD14++CD16-)_ParentalPercentage	-0.00268274	0.773504
rs2611215	A	CD14++CD16-_LMI1_parentPerc__Index3	Classical monocytes (CD14++CD16-)_ParentalPercentage	-0.00304911	0.783593
rs72928038	A	CD14++CD16-_LMI1_parentPerc__Index3	Classical monocytes (CD14++CD16-)_ParentalPercentage	0.00299352	0.807931
rs550448	A	CD14++CD16-_LMI1_parentPerc__Index3	Classical monocytes (CD14++CD16-)_ParentalPercentage	0.00329291	0.815573
rs12444268	A	CD14++CD16-_LMI1_parentPerc__Index3	Classical monocytes (CD14++CD16-)_ParentalPercentage	0.00265146	0.822359
rs947474	A	CD14++CD16-_LMI1_parentPerc__Index3	Classical monocytes (CD14++CD16-)_ParentalPercentage	-0.0019888	0.851482
rs2290400	C	CD14++CD16-_LMI1_parentPerc__Index3	Classical monocytes (CD14++CD16-)_ParentalPercentage	0.00173681	0.856487
rs12679857	A	CD14++CD16-_LMI1_parentPerc__Index3	Classical monocytes (CD14++CD16-)_ParentalPercentage	-0.00171674	0.858785
rs516246	T	CD14++CD16-_LMI1_parentPerc__Index3	Classical monocytes (CD14++CD16-)_ParentalPercentage	0.00147972	0.863519
rs2476601	A	CD14++CD16-_LMI1_parentPerc__Index3	Classical monocytes (CD14++CD16-)_ParentalPercentage	-0.0019521	0.864764
rs1615504	T	CD14++CD16-_LMI1_parentPerc__Index3	Classical monocytes (CD14++CD16-)_ParentalPercentage	-0.00158643	0.871001
rs1052553	A	CD14++CD16-_LMI1_parentPerc__Index3	Classical monocytes (CD14++CD16-)_ParentalPercentage	-0.0017136	0.8752
rs6691977	C	CD14++CD16-_LMI1_parentPerc__Index3	Classical monocytes (CD14++CD16-)_ParentalPercentage	-0.00167932	0.877981
rs3087243	G	CD14++CD16-_LMI1_parentPerc__Index3	Classical monocytes (CD14++CD16-)_ParentalPercentage	0.000513826	0.955998
rs17166496	G	CD14++CD16-_LMI1_parentPerc__Index3	Classical monocytes (CD14++CD16-)_ParentalPercentage	0.00051781	0.95948
rs11258747	T	CD14++CD16-_LMI1_parentPerc__Index3	Classical monocytes (CD14++CD16-)_ParentalPercentage	0.000387591	0.969489
rs9272346	G	CD14++CD16-_LMI1_parentPerc__Index3	Classical monocytes (CD14++CD16-)_ParentalPercentage	-0.000349218	0.976998
rs6518350	A	CD14++CD16+_LMI1_grandparentPerc__Index1	Non-classical monocytes (CD14++CD16+)_GrandParentalPercentage	-0.00150947	0.0124874
rs10509540	T	CD14++CD16+_LMI1_grandparentPerc__Index1	Non-classical monocytes (CD14++CD16+)_GrandParentalPercentage	0.0010046	0.0239233
rs5753037	T	CD14++CD16+_LMI1_grandparentPerc__Index1	Non-classical monocytes (CD14++CD16+)_GrandParentalPercentage	0.000992712	0.0243238
rs72928038	A	CD14++CD16+_LMI1_grandparentPerc__Index1	Non-classical monocytes (CD14++CD16+)_GrandParentalPercentage	-0.0012823	0.0283594
rs17166496	G	CD14++CD16+_LMI1_grandparentPerc__Index1	Non-classical monocytes (CD14++CD16+)_GrandParentalPercentage	-0.000993641	0.0402525
rs2269241	C	CD14++CD16+_LMI1_grandparentPerc__Index1	Non-classical monocytes (CD14++CD16+)_GrandParentalPercentage	0.001285	0.0424248
rs62447205	A	CD14++CD16+_LMI1_grandparentPerc__Index1	Non-classical monocytes (CD14++CD16+)_GrandParentalPercentage	0.000939816	0.0485385
rs4788084	C	CD14++CD16+_LMI1_grandparentPerc__Index1	Non-classical monocytes (CD14++CD16+)_GrandParentalPercentage	0.000840818	0.051617
rs10517086	A	CD14++CD16+_LMI1_grandparentPerc__Index1	Non-classical monocytes (CD14++CD16+)_GrandParentalPercentage	-0.000862628	0.0524556
rs11258747	T	CD14++CD16+_LMI1_grandparentPerc__Index1	Non-classical monocytes (CD14++CD16+)_GrandParentalPercentage	-0.000931791	0.0531728
rs11203203	A	CD14++CD16+_LMI1_grandparentPerc__Index1	Non-classical monocytes (CD14++CD16+)_GrandParentalPercentage	-0.000772214	0.0757595
rs1052553	A	CD14++CD16+_LMI1_grandparentPerc__Index1	Non-classical monocytes (CD14++CD16+)_GrandParentalPercentage	-0.000917707	0.0771844
rs653178	C	CD14++CD16+_LMI1_grandparentPerc__Index1	Non-classical monocytes (CD14++CD16+)_GrandParentalPercentage	-0.000680985	0.0959833
rs1983853	C	CD14++CD16+_LMI1_grandparentPerc__Index1	Non-classical monocytes (CD14++CD16+)_GrandParentalPercentage	-0.00132412	0.106484
rs12444268	A	CD14++CD16+_LMI1_grandparentPerc__Index1	Non-classical monocytes (CD14++CD16+)_GrandParentalPercentage	-0.00084595	0.132733
rs4505848	G	CD14++CD16+_LMI1_grandparentPerc__Index1	Non-classical monocytes (CD14++CD16+)_GrandParentalPercentage	0.000603179	0.14771
rs229533	C	CD14++CD16+_LMI1_grandparentPerc__Index1	Non-classical monocytes (CD14++CD16+)_GrandParentalPercentage	0.000629411	0.156579
rs13415583	T	CD14++CD16+_LMI1_grandparentPerc__Index1	Non-classical monocytes (CD14++CD16+)_GrandParentalPercentage	0.000606283	0.216896
rs689	T	CD14++CD16+_LMI1_grandparentPerc__Index1	Non-classical monocytes (CD14++CD16+)_GrandParentalPercentage	-0.000742376	0.222658
rs4849135	G	CD14++CD16+_LMI1_grandparentPerc__Index1	Non-classical monocytes (CD14++CD16+)_GrandParentalPercentage	-0.000570626	0.231454
rs3087243	G	CD14++CD16+_LMI1_grandparentPerc__Index1	Non-classical monocytes (CD14++CD16+)_GrandParentalPercentage	-0.000530573	0.232213
rs9388489	G	CD14++CD16+_LMI1_grandparentPerc__Index1	Non-classical monocytes (CD14++CD16+)_GrandParentalPercentage	0.000484151	0.240069
rs11954020	G	CD14++CD16+_LMI1_grandparentPerc__Index1	Non-classical monocytes (CD14++CD16+)_GrandParentalPercentage	-0.000474312	0.267072
rs7804356	T	CD14++CD16+_LMI1_grandparentPerc__Index1	Non-classical monocytes (CD14++CD16+)_GrandParentalPercentage	-0.000556309	0.267829
rs9585056	C	CD14++CD16+_LMI1_grandparentPerc__Index1	Non-classical monocytes (CD14++CD16+)_GrandParentalPercentage	-0.000560805	0.26939
rs1534422	G	CD14++CD16+_LMI1_grandparentPerc__Index1	Non-classical monocytes (CD14++CD16+)_GrandParentalPercentage	-0.00050378	0.278251
rs516246	T	CD14++CD16+_LMI1_grandparentPerc__Index1	Non-classical monocytes (CD14++CD16+)_GrandParentalPercentage	-0.000443742	0.279908
rs12927355	C	CD14++CD16+_LMI1_grandparentPerc__Index1	Non-classical monocytes (CD14++CD16+)_GrandParentalPercentage	0.000489216	0.282872
rs2290400	C	CD14++CD16+_LMI1_grandparentPerc__Index1	Non-classical monocytes (CD14++CD16+)_GrandParentalPercentage	0.000450941	0.325118
rs7202877	G	CD14++CD16+_LMI1_grandparentPerc__Index1	Non-classical monocytes (CD14++CD16+)_GrandParentalPercentage	0.000635992	0.339363
rs56994090	T	CD14++CD16+_LMI1_grandparentPerc__Index1	Non-classical monocytes (CD14++CD16+)_GrandParentalPercentage	0.000480314	0.357736
rs1893217	G	CD14++CD16+_LMI1_grandparentPerc__Index1	Non-classical monocytes (CD14++CD16+)_GrandParentalPercentage	0.000473856	0.370176
rs2611215	A	CD14++CD16+_LMI1_grandparentPerc__Index1	Non-classical monocytes (CD14++CD16+)_GrandParentalPercentage	-0.0004738	0.37127
rs4900384	G	CD14++CD16+_LMI1_grandparentPerc__Index1	Non-classical monocytes (CD14++CD16+)_GrandParentalPercentage	0.0003868	0.418269
rs6691977	C	CD14++CD16+_LMI1_grandparentPerc__Index1	Non-classical monocytes (CD14++CD16+)_GrandParentalPercentage	0.000337561	0.518081
rs6547853	G	CD14++CD16+_LMI1_grandparentPerc__Index1	Non-classical monocytes (CD14++CD16+)_GrandParentalPercentage	0.000267434	0.520918
rs2304256	C	CD14++CD16+_LMI1_grandparentPerc__Index1	Non-classical monocytes (CD14++CD16+)_GrandParentalPercentage	0.000306036	0.529929
rs1990760	T	CD14++CD16+_LMI1_grandparentPerc__Index1	Non-classical monocytes (CD14++CD16+)_GrandParentalPercentage	0.00025329	0.575819
rs478222	A	CD14++CD16+_LMI1_grandparentPerc__Index1	Non-classical monocytes (CD14++CD16+)_GrandParentalPercentage	-0.000219706	0.582045
rs425105	T	CD14++CD16+_LMI1_grandparentPerc__Index1	Non-classical monocytes (CD14++CD16+)_GrandParentalPercentage	0.000328608	0.589073
rs2476601	A	CD14++CD16+_LMI1_grandparentPerc__Index1	Non-classical monocytes (CD14++CD16+)_GrandParentalPercentage	-0.000294404	0.590695
rs10786436	T	CD14++CD16+_LMI1_grandparentPerc__Index1	Non-classical monocytes (CD14++CD16+)_GrandParentalPercentage	-0.000248199	0.601
rs193778	G	CD14++CD16+_LMI1_grandparentPerc__Index1	Non-classical monocytes (CD14++CD16+)_GrandParentalPercentage	-0.000229593	0.623179
rs539514	T	CD14++CD16+_LMI1_grandparentPerc__Index1	Non-classical monocytes (CD14++CD16+)_GrandParentalPercentage	-0.000208155	0.626676
rs16956936	C	CD14++CD16+_LMI1_grandparentPerc__Index1	Non-classical monocytes (CD14++CD16+)_GrandParentalPercentage	0.000312744	0.647189
rs2281808	C	CD14++CD16+_LMI1_grandparentPerc__Index1	Non-classical monocytes (CD14++CD16+)_GrandParentalPercentage	0.000204021	0.656304
rs924043	C	CD14++CD16+_LMI1_grandparentPerc__Index1	Non-classical monocytes (CD14++CD16+)_GrandParentalPercentage	0.000270616	0.667926
rs10137082	C	CD14++CD16+_LMI1_grandparentPerc__Index1	Non-classical monocytes (CD14++CD16+)_GrandParentalPercentage	-0.000200984	0.680068
rs1615504	T	CD14++CD16+_LMI1_grandparentPerc__Index1	Non-classical monocytes (CD14++CD16+)_GrandParentalPercentage	-0.0001847	0.692245
rs1465788	C	CD14++CD16+_LMI1_grandparentPerc__Index1	Non-classical monocytes (CD14++CD16+)_GrandParentalPercentage	0.000182291	0.711056
rs3825932	T	CD14++CD16+_LMI1_grandparentPerc__Index1	Non-classical monocytes (CD14++CD16+)_GrandParentalPercentage	0.000166144	0.712237
rs3024505	G	CD14++CD16+_LMI1_grandparentPerc__Index1	Non-classical monocytes (CD14++CD16+)_GrandParentalPercentage	0.00019247	0.755038
rs2292239	T	CD14++CD16+_LMI1_grandparentPerc__Index1	Non-classical monocytes (CD14++CD16+)_GrandParentalPercentage	-0.000122276	0.776815
rs10795791	G	CD14++CD16+_LMI1_grandparentPerc__Index1	Non-classical monocytes (CD14++CD16+)_GrandParentalPercentage	0.000111939	0.802251
rs7020673	G	CD14++CD16+_LMI1_grandparentPerc__Index1	Non-classical monocytes (CD14++CD16+)_GrandParentalPercentage	0.000101313	0.811854
rs947474	A	CD14++CD16+_LMI1_grandparentPerc__Index1	Non-classical monocytes (CD14++CD16+)_GrandParentalPercentage	0.000106587	0.833635
rs4763879	A	CD14++CD16+_LMI1_grandparentPerc__Index1	Non-classical monocytes (CD14++CD16+)_GrandParentalPercentage	6.84623e-05	0.870442
rs12679857	A	CD14++CD16+_LMI1_grandparentPerc__Index1	Non-classical monocytes (CD14++CD16+)_GrandParentalPercentage	7.03754e-05	0.878657
rs2165738	C	CD14++CD16+_LMI1_grandparentPerc__Index1	Non-classical monocytes (CD14++CD16+)_GrandParentalPercentage	6.71584e-05	0.896658
rs72727394	T	CD14++CD16+_LMI1_grandparentPerc__Index1	Non-classical monocytes (CD14++CD16+)_GrandParentalPercentage	6.66116e-05	0.897723
rs9272346	G	CD14++CD16+_LMI1_grandparentPerc__Index1	Non-classical monocytes (CD14++CD16+)_GrandParentalPercentage	-4.3013e-05	0.940741
rs11574435	C	CD14++CD16+_LMI1_grandparentPerc__Index1	Non-classical monocytes (CD14++CD16+)_GrandParentalPercentage	5.4994e-05	0.94663
rs550448	A	CD14++CD16+_LMI1_grandparentPerc__Index1	Non-classical monocytes (CD14++CD16+)_GrandParentalPercentage	4.36862e-05	0.948358
rs10509540	T	CD14++CD16+_LMI1_parentPerc__Index3	Non-classical monocytes (CD14++CD16+)_ParentalPercentage	0.0134942	0.00590735
rs11203203	A	CD14++CD16+_LMI1_parentPerc__Index3	Non-classical monocytes (CD14++CD16+)_ParentalPercentage	-0.0118902	0.013028
rs2269241	C	CD14++CD16+_LMI1_parentPerc__Index3	Non-classical monocytes (CD14++CD16+)_ParentalPercentage	0.0159236	0.022713
rs6518350	A	CD14++CD16+_LMI1_parentPerc__Index3	Non-classical monocytes (CD14++CD16+)_ParentalPercentage	-0.0152209	0.0228345
rs72928038	A	CD14++CD16+_LMI1_parentPerc__Index3	Non-classical monocytes (CD14++CD16+)_ParentalPercentage	-0.014481	0.0250535
rs5753037	T	CD14++CD16+_LMI1_parentPerc__Index3	Non-classical monocytes (CD14++CD16+)_ParentalPercentage	0.0103817	0.0332165
rs653178	C	CD14++CD16+_LMI1_parentPerc__Index3	Non-classical monocytes (CD14++CD16+)_ParentalPercentage	-0.00879346	0.051504
rs10517086	A	CD14++CD16+_LMI1_parentPerc__Index3	Non-classical monocytes (CD14++CD16+)_ParentalPercentage	-0.00934392	0.057388
rs62447205	A	CD14++CD16+_LMI1_parentPerc__Index3	Non-classical monocytes (CD14++CD16+)_ParentalPercentage	0.00938649	0.074908
rs17166496	G	CD14++CD16+_LMI1_parentPerc__Index3	Non-classical monocytes (CD14++CD16+)_ParentalPercentage	-0.00953218	0.0753883
rs11258747	T	CD14++CD16+_LMI1_parentPerc__Index3	Non-classical monocytes (CD14++CD16+)_ParentalPercentage	-0.00880587	0.0986869
rs6547853	G	CD14++CD16+_LMI1_parentPerc__Index3	Non-classical monocytes (CD14++CD16+)_ParentalPercentage	0.00726883	0.113507
rs4505848	G	CD14++CD16+_LMI1_parentPerc__Index3	Non-classical monocytes (CD14++CD16+)_ParentalPercentage	0.00717097	0.119276
rs3087243	G	CD14++CD16+_LMI1_parentPerc__Index3	Non-classical monocytes (CD14++CD16+)_ParentalPercentage	-0.00745476	0.12842
rs4788084	C	CD14++CD16+_LMI1_parentPerc__Index3	Non-classical monocytes (CD14++CD16+)_ParentalPercentage	0.00725454	0.129357
rs1983853	C	CD14++CD16+_LMI1_parentPerc__Index3	Non-classical monocytes (CD14++CD16+)_ParentalPercentage	-0.0134768	0.137338
rs9585056	C	CD14++CD16+_LMI1_parentPerc__Index3	Non-classical monocytes (CD14++CD16+)_ParentalPercentage	-0.00778975	0.164756
rs9388489	G	CD14++CD16+_LMI1_parentPerc__Index3	Non-classical monocytes (CD14++CD16+)_ParentalPercentage	0.00592825	0.192904
rs2290400	C	CD14++CD16+_LMI1_parentPerc__Index3	Non-classical monocytes (CD14++CD16+)_ParentalPercentage	0.00648385	0.200137
rs1052553	A	CD14++CD16+_LMI1_parentPerc__Index3	Non-classical monocytes (CD14++CD16+)_ParentalPercentage	-0.00736552	0.200177
rs539514	T	CD14++CD16+_LMI1_parentPerc__Index3	Non-classical monocytes (CD14++CD16+)_ParentalPercentage	-0.00597293	0.2059
rs229533	C	CD14++CD16+_LMI1_parentPerc__Index3	Non-classical monocytes (CD14++CD16+)_ParentalPercentage	0.00605758	0.217619
rs1534422	G	CD14++CD16+_LMI1_parentPerc__Index3	Non-classical monocytes (CD14++CD16+)_ParentalPercentage	-0.00607182	0.236932
rs4849135	G	CD14++CD16+_LMI1_parentPerc__Index3	Non-classical monocytes (CD14++CD16+)_ParentalPercentage	-0.00610491	0.246786
rs11954020	G	CD14++CD16+_LMI1_parentPerc__Index3	Non-classical monocytes (CD14++CD16+)_ParentalPercentage	-0.00535145	0.257209
rs516246	T	CD14++CD16+_LMI1_parentPerc__Index3	Non-classical monocytes (CD14++CD16+)_ParentalPercentage	-0.00495344	0.275115
rs425105	T	CD14++CD16+_LMI1_parentPerc__Index3	Non-classical monocytes (CD14++CD16+)_ParentalPercentage	0.00717233	0.28559
rs12444268	A	CD14++CD16+_LMI1_parentPerc__Index3	Non-classical monocytes (CD14++CD16+)_ParentalPercentage	-0.00663071	0.286992
rs7202877	G	CD14++CD16+_LMI1_parentPerc__Index3	Non-classical monocytes (CD14++CD16+)_ParentalPercentage	0.00765941	0.297739
rs1990760	T	CD14++CD16+_LMI1_parentPerc__Index3	Non-classical monocytes (CD14++CD16+)_ParentalPercentage	0.00510522	0.307143
rs12927355	C	CD14++CD16+_LMI1_parentPerc__Index3	Non-classical monocytes (CD14++CD16+)_ParentalPercentage	0.00499513	0.321255
rs2476601	A	CD14++CD16+_LMI1_parentPerc__Index3	Non-classical monocytes (CD14++CD16+)_ParentalPercentage	-0.00589786	0.329247
rs1893217	G	CD14++CD16+_LMI1_parentPerc__Index3	Non-classical monocytes (CD14++CD16+)_ParentalPercentage	0.00556416	0.340995
rs193778	G	CD14++CD16+_LMI1_parentPerc__Index3	Non-classical monocytes (CD14++CD16+)_ParentalPercentage	-0.00471563	0.360847
rs4763879	A	CD14++CD16+_LMI1_parentPerc__Index3	Non-classical monocytes (CD14++CD16+)_ParentalPercentage	0.0041521	0.370358
rs11574435	C	CD14++CD16+_LMI1_parentPerc__Index3	Non-classical monocytes (CD14++CD16+)_ParentalPercentage	-0.00808856	0.372581
rs1465788	C	CD14++CD16+_LMI1_parentPerc__Index3	Non-classical monocytes (CD14++CD16+)_ParentalPercentage	0.0048347	0.373669
rs6691977	C	CD14++CD16+_LMI1_parentPerc__Index3	Non-classical monocytes (CD14++CD16+)_ParentalPercentage	0.00499884	0.386321
rs689	T	CD14++CD16+_LMI1_parentPerc__Index3	Non-classical monocytes (CD14++CD16+)_ParentalPercentage	-0.00550923	0.413351
rs13415583	T	CD14++CD16+_LMI1_parentPerc__Index3	Non-classical monocytes (CD14++CD16+)_ParentalPercentage	0.00427176	0.431675
rs7020673	G	CD14++CD16+_LMI1_parentPerc__Index3	Non-classical monocytes (CD14++CD16+)_ParentalPercentage	0.00364282	0.4384
rs7804356	T	CD14++CD16+_LMI1_parentPerc__Index3	Non-classical monocytes (CD14++CD16+)_ParentalPercentage	-0.00423144	0.446071
rs10786436	T	CD14++CD16+_LMI1_parentPerc__Index3	Non-classical monocytes (CD14++CD16+)_ParentalPercentage	-0.0038523	0.462561
rs2611215	A	CD14++CD16+_LMI1_parentPerc__Index3	Non-classical monocytes (CD14++CD16+)_ParentalPercentage	-0.00404654	0.489796
rs2292239	T	CD14++CD16+_LMI1_parentPerc__Index3	Non-classical monocytes (CD14++CD16+)_ParentalPercentage	-0.00250716	0.598876
rs947474	A	CD14++CD16+_LMI1_parentPerc__Index3	Non-classical monocytes (CD14++CD16+)_ParentalPercentage	-0.00247281	0.65923
rs4900384	G	CD14++CD16+_LMI1_parentPerc__Index3	Non-classical monocytes (CD14++CD16+)_ParentalPercentage	0.0022254	0.673677
rs72727394	T	CD14++CD16+_LMI1_parentPerc__Index3	Non-classical monocytes (CD14++CD16+)_ParentalPercentage	0.00236516	0.679593
rs924043	C	CD14++CD16+_LMI1_parentPerc__Index3	Non-classical monocytes (CD14++CD16+)_ParentalPercentage	0.00272812	0.695588
rs478222	A	CD14++CD16+_LMI1_parentPerc__Index3	Non-classical monocytes (CD14++CD16+)_ParentalPercentage	-0.0017002	0.700016
rs2304256	C	CD14++CD16+_LMI1_parentPerc__Index3	Non-classical monocytes (CD14++CD16+)_ParentalPercentage	0.00196227	0.715652
rs2165738	C	CD14++CD16+_LMI1_parentPerc__Index3	Non-classical monocytes (CD14++CD16+)_ParentalPercentage	-0.00206648	0.717613
rs1615504	T	CD14++CD16+_LMI1_parentPerc__Index3	Non-classical monocytes (CD14++CD16+)_ParentalPercentage	0.00165419	0.748426
rs550448	A	CD14++CD16+_LMI1_parentPerc__Index3	Non-classical monocytes (CD14++CD16+)_ParentalPercentage	-0.00182064	0.807045
rs12679857	A	CD14++CD16+_LMI1_parentPerc__Index3	Non-classical monocytes (CD14++CD16+)_ParentalPercentage	0.00114661	0.821927
rs3024505	G	CD14++CD16+_LMI1_parentPerc__Index3	Non-classical monocytes (CD14++CD16+)_ParentalPercentage	-0.00121753	0.858284
rs16956936	C	CD14++CD16+_LMI1_parentPerc__Index3	Non-classical monocytes (CD14++CD16+)_ParentalPercentage	0.00127444	0.866027
rs10137082	C	CD14++CD16+_LMI1_parentPerc__Index3	Non-classical monocytes (CD14++CD16+)_ParentalPercentage	-0.000540457	0.920098
rs56994090	T	CD14++CD16+_LMI1_parentPerc__Index3	Non-classical monocytes (CD14++CD16+)_ParentalPercentage	0.00055136	0.923979
rs10795791	G	CD14++CD16+_LMI1_parentPerc__Index3	Non-classical monocytes (CD14++CD16+)_ParentalPercentage	0.000427058	0.931117
rs9272346	G	CD14++CD16+_LMI1_parentPerc__Index3	Non-classical monocytes (CD14++CD16+)_ParentalPercentage	-0.00048653	0.939356
rs2281808	C	CD14++CD16+_LMI1_parentPerc__Index3	Non-classical monocytes (CD14++CD16+)_ParentalPercentage	0.000166615	0.973775
rs3825932	T	CD14++CD16+_LMI1_parentPerc__Index3	Non-classical monocytes (CD14++CD16+)_ParentalPercentage	1.76551e-05	0.997171
rs4788084	C	CD14+CD16+_LMI1_grandparentPerc__Index1	Intermediate monocytes (CD14+CD16+)_GrandParentalPercentage	0.000827834	0.000274815
rs4505848	G	CD14+CD16+_LMI1_grandparentPerc__Index1	Intermediate monocytes (CD14+CD16+)_GrandParentalPercentage	0.000395414	0.0744785
rs193778	G	CD14+CD16+_LMI1_grandparentPerc__Index1	Intermediate monocytes (CD14+CD16+)_GrandParentalPercentage	-0.000442379	0.0745276
rs924043	C	CD14+CD16+_LMI1_grandparentPerc__Index1	Intermediate monocytes (CD14+CD16+)_GrandParentalPercentage	-0.000581822	0.0823535
rs4900384	G	CD14+CD16+_LMI1_grandparentPerc__Index1	Intermediate monocytes (CD14+CD16+)_GrandParentalPercentage	0.000434593	0.0869447
rs6518350	A	CD14+CD16+_LMI1_grandparentPerc__Index1	Intermediate monocytes (CD14+CD16+)_GrandParentalPercentage	-0.000549032	0.0893972
rs56994090	T	CD14+CD16+_LMI1_grandparentPerc__Index1	Intermediate monocytes (CD14+CD16+)_GrandParentalPercentage	0.00045736	0.0994578
rs11258747	T	CD14+CD16+_LMI1_grandparentPerc__Index1	Intermediate monocytes (CD14+CD16+)_GrandParentalPercentage	-0.000383155	0.136325
rs1052553	A	CD14+CD16+_LMI1_grandparentPerc__Index1	Intermediate monocytes (CD14+CD16+)_GrandParentalPercentage	-0.000411375	0.137458
rs1615504	T	CD14+CD16+_LMI1_grandparentPerc__Index1	Intermediate monocytes (CD14+CD16+)_GrandParentalPercentage	-0.000364499	0.141635
rs689	T	CD14+CD16+_LMI1_grandparentPerc__Index1	Intermediate monocytes (CD14+CD16+)_GrandParentalPercentage	-0.00042282	0.19222
rs12444268	A	CD14+CD16+_LMI1_grandparentPerc__Index1	Intermediate monocytes (CD14+CD16+)_GrandParentalPercentage	-0.000381831	0.203114
rs12679857	A	CD14+CD16+_LMI1_grandparentPerc__Index1	Intermediate monocytes (CD14+CD16+)_GrandParentalPercentage	0.000310469	0.205282
rs7020673	G	CD14+CD16+_LMI1_grandparentPerc__Index1	Intermediate monocytes (CD14+CD16+)_GrandParentalPercentage	0.000274582	0.225129
rs2281808	C	CD14+CD16+_LMI1_grandparentPerc__Index1	Intermediate monocytes (CD14+CD16+)_GrandParentalPercentage	0.000273026	0.263028
rs2611215	A	CD14+CD16+_LMI1_grandparentPerc__Index1	Intermediate monocytes (CD14+CD16+)_GrandParentalPercentage	0.000310557	0.271086
rs4849135	G	CD14+CD16+_LMI1_grandparentPerc__Index1	Intermediate monocytes (CD14+CD16+)_GrandParentalPercentage	-0.000277404	0.275014
rs7202877	G	CD14+CD16+_LMI1_grandparentPerc__Index1	Intermediate monocytes (CD14+CD16+)_GrandParentalPercentage	0.000383982	0.278772
rs72727394	T	CD14+CD16+_LMI1_grandparentPerc__Index1	Intermediate monocytes (CD14+CD16+)_GrandParentalPercentage	-0.000283702	0.303539
rs10786436	T	CD14+CD16+_LMI1_grandparentPerc__Index1	Intermediate monocytes (CD14+CD16+)_GrandParentalPercentage	-0.000251239	0.319984
rs425105	T	CD14+CD16+_LMI1_grandparentPerc__Index1	Intermediate monocytes (CD14+CD16+)_GrandParentalPercentage	0.000313712	0.332685
rs11574435	C	CD14+CD16+_LMI1_grandparentPerc__Index1	Intermediate monocytes (CD14+CD16+)_GrandParentalPercentage	0.000420873	0.335724
rs7804356	T	CD14+CD16+_LMI1_grandparentPerc__Index1	Intermediate monocytes (CD14+CD16+)_GrandParentalPercentage	-0.000241012	0.367791
rs6547853	G	CD14+CD16+_LMI1_grandparentPerc__Index1	Intermediate monocytes (CD14+CD16+)_GrandParentalPercentage	-0.000187947	0.396939
rs550448	A	CD14+CD16+_LMI1_grandparentPerc__Index1	Intermediate monocytes (CD14+CD16+)_GrandParentalPercentage	0.000297007	0.40812
rs1983853	C	CD14+CD16+_LMI1_grandparentPerc__Index1	Intermediate monocytes (CD14+CD16+)_GrandParentalPercentage	-0.00035893	0.412561
rs653178	C	CD14+CD16+_LMI1_grandparentPerc__Index1	Intermediate monocytes (CD14+CD16+)_GrandParentalPercentage	-0.000165913	0.447706
rs72928038	A	CD14+CD16+_LMI1_grandparentPerc__Index1	Intermediate monocytes (CD14+CD16+)_GrandParentalPercentage	-0.000235152	0.452803
rs3825932	T	CD14+CD16+_LMI1_grandparentPerc__Index1	Intermediate monocytes (CD14+CD16+)_GrandParentalPercentage	-0.000172357	0.472407
rs1534422	G	CD14+CD16+_LMI1_grandparentPerc__Index1	Intermediate monocytes (CD14+CD16+)_GrandParentalPercentage	-0.000177264	0.474278
rs2165738	C	CD14+CD16+_LMI1_grandparentPerc__Index1	Intermediate monocytes (CD14+CD16+)_GrandParentalPercentage	0.000185843	0.499679
rs4763879	A	CD14+CD16+_LMI1_grandparentPerc__Index1	Intermediate monocytes (CD14+CD16+)_GrandParentalPercentage	0.000138224	0.536346
rs10795791	G	CD14+CD16+_LMI1_grandparentPerc__Index1	Intermediate monocytes (CD14+CD16+)_GrandParentalPercentage	0.000141528	0.552158
rs478222	A	CD14+CD16+_LMI1_grandparentPerc__Index1	Intermediate monocytes (CD14+CD16+)_GrandParentalPercentage	0.000121555	0.567595
rs1465788	C	CD14+CD16+_LMI1_grandparentPerc__Index1	Intermediate monocytes (CD14+CD16+)_GrandParentalPercentage	0.000135954	0.604002
rs17166496	G	CD14+CD16+_LMI1_grandparentPerc__Index1	Intermediate monocytes (CD14+CD16+)_GrandParentalPercentage	-0.000133665	0.60624
rs6691977	C	CD14+CD16+_LMI1_grandparentPerc__Index1	Intermediate monocytes (CD14+CD16+)_GrandParentalPercentage	-0.000142197	0.6094
rs11203203	A	CD14+CD16+_LMI1_grandparentPerc__Index1	Intermediate monocytes (CD14+CD16+)_GrandParentalPercentage	-0.000109239	0.638453
rs13415583	T	CD14+CD16+_LMI1_grandparentPerc__Index1	Intermediate monocytes (CD14+CD16+)_GrandParentalPercentage	-0.000118058	0.652273
rs12927355	C	CD14+CD16+_LMI1_grandparentPerc__Index1	Intermediate monocytes (CD14+CD16+)_GrandParentalPercentage	-9.94144e-05	0.682446
rs3087243	G	CD14+CD16+_LMI1_grandparentPerc__Index1	Intermediate monocytes (CD14+CD16+)_GrandParentalPercentage	9.3479e-05	0.69323
rs16956936	C	CD14+CD16+_LMI1_grandparentPerc__Index1	Intermediate monocytes (CD14+CD16+)_GrandParentalPercentage	0.00012744	0.726325
rs10137082	C	CD14+CD16+_LMI1_grandparentPerc__Index1	Intermediate monocytes (CD14+CD16+)_GrandParentalPercentage	9.02122e-05	0.72829
rs539514	T	CD14+CD16+_LMI1_grandparentPerc__Index1	Intermediate monocytes (CD14+CD16+)_GrandParentalPercentage	-7.88159e-05	0.729606
rs2269241	C	CD14+CD16+_LMI1_grandparentPerc__Index1	Intermediate monocytes (CD14+CD16+)_GrandParentalPercentage	0.000113036	0.738794
rs9272346	G	CD14+CD16+_LMI1_grandparentPerc__Index1	Intermediate monocytes (CD14+CD16+)_GrandParentalPercentage	9.74591e-05	0.751854
rs5753037	T	CD14+CD16+_LMI1_grandparentPerc__Index1	Intermediate monocytes (CD14+CD16+)_GrandParentalPercentage	7.46975e-05	0.751882
rs1990760	T	CD14+CD16+_LMI1_grandparentPerc__Index1	Intermediate monocytes (CD14+CD16+)_GrandParentalPercentage	-7.46349e-05	0.757039
rs1893217	G	CD14+CD16+_LMI1_grandparentPerc__Index1	Intermediate monocytes (CD14+CD16+)_GrandParentalPercentage	8.06814e-05	0.774764
rs2292239	T	CD14+CD16+_LMI1_grandparentPerc__Index1	Intermediate monocytes (CD14+CD16+)_GrandParentalPercentage	-5.90935e-05	0.79707
rs2290400	C	CD14+CD16+_LMI1_grandparentPerc__Index1	Intermediate monocytes (CD14+CD16+)_GrandParentalPercentage	-5.60577e-05	0.818598
rs11954020	G	CD14+CD16+_LMI1_grandparentPerc__Index1	Intermediate monocytes (CD14+CD16+)_GrandParentalPercentage	-4.72723e-05	0.83576
rs9585056	C	CD14+CD16+_LMI1_grandparentPerc__Index1	Intermediate monocytes (CD14+CD16+)_GrandParentalPercentage	5.22983e-05	0.846918
rs229533	C	CD14+CD16+_LMI1_grandparentPerc__Index1	Intermediate monocytes (CD14+CD16+)_GrandParentalPercentage	4.2981e-05	0.856249
rs10517086	A	CD14+CD16+_LMI1_grandparentPerc__Index1	Intermediate monocytes (CD14+CD16+)_GrandParentalPercentage	-3.97413e-05	0.867409
rs516246	T	CD14+CD16+_LMI1_grandparentPerc__Index1	Intermediate monocytes (CD14+CD16+)_GrandParentalPercentage	3.42539e-05	0.875762
rs62447205	A	CD14+CD16+_LMI1_grandparentPerc__Index1	Intermediate monocytes (CD14+CD16+)_GrandParentalPercentage	-2.98221e-05	0.906906
rs947474	A	CD14+CD16+_LMI1_grandparentPerc__Index1	Intermediate monocytes (CD14+CD16+)_GrandParentalPercentage	-3.11905e-05	0.908155
rs2304256	C	CD14+CD16+_LMI1_grandparentPerc__Index1	Intermediate monocytes (CD14+CD16+)_GrandParentalPercentage	-2.81021e-05	0.913828
rs3024505	G	CD14+CD16+_LMI1_grandparentPerc__Index1	Intermediate monocytes (CD14+CD16+)_GrandParentalPercentage	-3.22385e-05	0.921867
rs9388489	G	CD14+CD16+_LMI1_grandparentPerc__Index1	Intermediate monocytes (CD14+CD16+)_GrandParentalPercentage	1.09202e-05	0.960398
rs10509540	T	CD14+CD16+_LMI1_grandparentPerc__Index1	Intermediate monocytes (CD14+CD16+)_GrandParentalPercentage	1.16351e-05	0.961084
rs2476601	A	CD14+CD16+_LMI1_grandparentPerc__Index1	Intermediate monocytes (CD14+CD16+)_GrandParentalPercentage	4.8784e-06	0.986658
rs4788084	C	CD14+CD16+_LMI1_parentPerc__Index3	Intermediate monocytes (CD14+CD16+)_ParentalPercentage	0.00740782	0.0084642
rs193778	G	CD14+CD16+_LMI1_parentPerc__Index3	Intermediate monocytes (CD14+CD16+)_ParentalPercentage	-0.00791127	0.00904097
rs924043	C	CD14+CD16+_LMI1_parentPerc__Index3	Intermediate monocytes (CD14+CD16+)_ParentalPercentage	-0.00836048	0.0416401
rs4763879	A	CD14+CD16+_LMI1_parentPerc__Index3	Intermediate monocytes (CD14+CD16+)_ParentalPercentage	0.0051194	0.0610076
rs7020673	G	CD14+CD16+_LMI1_parentPerc__Index3	Intermediate monocytes (CD14+CD16+)_ParentalPercentage	0.00505754	0.0680198
rs425105	T	CD14+CD16+_LMI1_parentPerc__Index3	Intermediate monocytes (CD14+CD16+)_ParentalPercentage	0.00631673	0.111232
rs4505848	G	CD14+CD16+_LMI1_parentPerc__Index3	Intermediate monocytes (CD14+CD16+)_ParentalPercentage	0.00422311	0.120898
rs2611215	A	CD14+CD16+_LMI1_parentPerc__Index3	Intermediate monocytes (CD14+CD16+)_ParentalPercentage	0.00526283	0.128018
rs539514	T	CD14+CD16+_LMI1_parentPerc__Index3	Intermediate monocytes (CD14+CD16+)_ParentalPercentage	-0.00388402	0.164167
rs12679857	A	CD14+CD16+_LMI1_parentPerc__Index3	Intermediate monocytes (CD14+CD16+)_ParentalPercentage	0.00388509	0.19642
rs478222	A	CD14+CD16+_LMI1_parentPerc__Index3	Intermediate monocytes (CD14+CD16+)_ParentalPercentage	0.00318629	0.221416
rs13415583	T	CD14+CD16+_LMI1_parentPerc__Index3	Intermediate monocytes (CD14+CD16+)_ParentalPercentage	-0.00389278	0.225238
rs1465788	C	CD14+CD16+_LMI1_parentPerc__Index3	Intermediate monocytes (CD14+CD16+)_ParentalPercentage	0.00359421	0.263244
rs3825932	T	CD14+CD16+_LMI1_parentPerc__Index3	Intermediate monocytes (CD14+CD16+)_ParentalPercentage	-0.00327978	0.264719
rs947474	A	CD14+CD16+_LMI1_parentPerc__Index3	Intermediate monocytes (CD14+CD16+)_ParentalPercentage	-0.00351057	0.289323
rs10786436	T	CD14+CD16+_LMI1_parentPerc__Index3	Intermediate monocytes (CD14+CD16+)_ParentalPercentage	-0.00315834	0.308254
rs11203203	A	CD14+CD16+_LMI1_parentPerc__Index3	Intermediate monocytes (CD14+CD16+)_ParentalPercentage	-0.00282574	0.321482
rs4900384	G	CD14+CD16+_LMI1_parentPerc__Index3	Intermediate monocytes (CD14+CD16+)_ParentalPercentage	0.00306028	0.327103
rs4849135	G	CD14+CD16+_LMI1_parentPerc__Index3	Intermediate monocytes (CD14+CD16+)_ParentalPercentage	-0.00298207	0.339083
rs10137082	C	CD14+CD16+_LMI1_parentPerc__Index3	Intermediate monocytes (CD14+CD16+)_ParentalPercentage	0.00292563	0.358117
rs7202877	G	CD14+CD16+_LMI1_parentPerc__Index3	Intermediate monocytes (CD14+CD16+)_ParentalPercentage	0.00380159	0.382428
rs689	T	CD14+CD16+_LMI1_parentPerc__Index3	Intermediate monocytes (CD14+CD16+)_ParentalPercentage	-0.00339101	0.394605
rs1534422	G	CD14+CD16+_LMI1_parentPerc__Index3	Intermediate monocytes (CD14+CD16+)_ParentalPercentage	-0.00239887	0.429977
rs6518350	A	CD14+CD16+_LMI1_parentPerc__Index3	Intermediate monocytes (CD14+CD16+)_ParentalPercentage	-0.00312744	0.431661
rs3024505	G	CD14+CD16+_LMI1_parentPerc__Index3	Intermediate monocytes (CD14+CD16+)_ParentalPercentage	-0.00308411	0.444148
rs653178	C	CD14+CD16+_LMI1_parentPerc__Index3	Intermediate monocytes (CD14+CD16+)_ParentalPercentage	-0.00186593	0.486563
rs2269241	C	CD14+CD16+_LMI1_parentPerc__Index3	Intermediate monocytes (CD14+CD16+)_ParentalPercentage	0.00283123	0.495915
rs2304256	C	CD14+CD16+_LMI1_parentPerc__Index3	Intermediate monocytes (CD14+CD16+)_ParentalPercentage	-0.00205072	0.519677
rs11258747	T	CD14+CD16+_LMI1_parentPerc__Index3	Intermediate monocytes (CD14+CD16+)_ParentalPercentage	-0.00192079	0.543713
rs2292239	T	CD14+CD16+_LMI1_parentPerc__Index3	Intermediate monocytes (CD14+CD16+)_ParentalPercentage	-0.00168528	0.549945
rs12927355	C	CD14+CD16+_LMI1_parentPerc__Index3	Intermediate monocytes (CD14+CD16+)_ParentalPercentage	-0.00173056	0.561567
rs12444268	A	CD14+CD16+_LMI1_parentPerc__Index3	Intermediate monocytes (CD14+CD16+)_ParentalPercentage	-0.0020696	0.574592
rs2281808	C	CD14+CD16+_LMI1_parentPerc__Index3	Intermediate monocytes (CD14+CD16+)_ParentalPercentage	0.00166244	0.579056
rs10795791	G	CD14+CD16+_LMI1_parentPerc__Index3	Intermediate monocytes (CD14+CD16+)_ParentalPercentage	0.00155473	0.594584
rs56994090	T	CD14+CD16+_LMI1_parentPerc__Index3	Intermediate monocytes (CD14+CD16+)_ParentalPercentage	0.0017858	0.60119
rs3087243	G	CD14+CD16+_LMI1_parentPerc__Index3	Intermediate monocytes (CD14+CD16+)_ParentalPercentage	0.00141261	0.627075
rs7804356	T	CD14+CD16+_LMI1_parentPerc__Index3	Intermediate monocytes (CD14+CD16+)_ParentalPercentage	-0.0015753	0.63166
rs72727394	T	CD14+CD16+_LMI1_parentPerc__Index3	Intermediate monocytes (CD14+CD16+)_ParentalPercentage	-0.00160618	0.63534
rs1893217	G	CD14+CD16+_LMI1_parentPerc__Index3	Intermediate monocytes (CD14+CD16+)_ParentalPercentage	0.00162728	0.638056
rs516246	T	CD14+CD16+_LMI1_parentPerc__Index3	Intermediate monocytes (CD14+CD16+)_ParentalPercentage	0.00107586	0.688976
rs1052553	A	CD14+CD16+_LMI1_parentPerc__Index3	Intermediate monocytes (CD14+CD16+)_ParentalPercentage	-0.00135062	0.691785
rs10509540	T	CD14+CD16+_LMI1_parentPerc__Index3	Intermediate monocytes (CD14+CD16+)_ParentalPercentage	0.00115216	0.693701
rs62447205	A	CD14+CD16+_LMI1_parentPerc__Index3	Intermediate monocytes (CD14+CD16+)_ParentalPercentage	-0.00121437	0.697914
rs6691977	C	CD14+CD16+_LMI1_parentPerc__Index3	Intermediate monocytes (CD14+CD16+)_ParentalPercentage	-0.00131301	0.700666
rs9388489	G	CD14+CD16+_LMI1_parentPerc__Index3	Intermediate monocytes (CD14+CD16+)_ParentalPercentage	0.000898181	0.739228
rs72928038	A	CD14+CD16+_LMI1_parentPerc__Index3	Intermediate monocytes (CD14+CD16+)_ParentalPercentage	-0.00124287	0.746549
rs10517086	A	CD14+CD16+_LMI1_parentPerc__Index3	Intermediate monocytes (CD14+CD16+)_ParentalPercentage	0.000866158	0.766807
rs1983853	C	CD14+CD16+_LMI1_parentPerc__Index3	Intermediate monocytes (CD14+CD16+)_ParentalPercentage	-0.00157586	0.769546
rs550448	A	CD14+CD16+_LMI1_parentPerc__Index3	Intermediate monocytes (CD14+CD16+)_ParentalPercentage	0.00114245	0.795547
rs2476601	A	CD14+CD16+_LMI1_parentPerc__Index3	Intermediate monocytes (CD14+CD16+)_ParentalPercentage	-0.000904142	0.800585
rs11574435	C	CD14+CD16+_LMI1_parentPerc__Index3	Intermediate monocytes (CD14+CD16+)_ParentalPercentage	-0.00132946	0.80448
rs229533	C	CD14+CD16+_LMI1_parentPerc__Index3	Intermediate monocytes (CD14+CD16+)_ParentalPercentage	-0.00068988	0.812685
rs9272346	G	CD14+CD16+_LMI1_parentPerc__Index3	Intermediate monocytes (CD14+CD16+)_ParentalPercentage	0.000796315	0.833253
rs9585056	C	CD14+CD16+_LMI1_parentPerc__Index3	Intermediate monocytes (CD14+CD16+)_ParentalPercentage	-0.000625385	0.850773
rs2290400	C	CD14+CD16+_LMI1_parentPerc__Index3	Intermediate monocytes (CD14+CD16+)_ParentalPercentage	-0.000455917	0.879182
rs1615504	T	CD14+CD16+_LMI1_parentPerc__Index3	Intermediate monocytes (CD14+CD16+)_ParentalPercentage	-0.00025092	0.934457
rs2165738	C	CD14+CD16+_LMI1_parentPerc__Index3	Intermediate monocytes (CD14+CD16+)_ParentalPercentage	0.000211471	0.950117
rs1990760	T	CD14+CD16+_LMI1_parentPerc__Index3	Intermediate monocytes (CD14+CD16+)_ParentalPercentage	-0.000183613	0.950548
rs5753037	T	CD14+CD16+_LMI1_parentPerc__Index3	Intermediate monocytes (CD14+CD16+)_ParentalPercentage	-0.000169967	0.953255
rs16956936	C	CD14+CD16+_LMI1_parentPerc__Index3	Intermediate monocytes (CD14+CD16+)_ParentalPercentage	0.000253008	0.954846
rs11954020	G	CD14+CD16+_LMI1_parentPerc__Index3	Intermediate monocytes (CD14+CD16+)_ParentalPercentage	8.87339e-05	0.974701
rs17166496	G	CD14+CD16+_LMI1_parentPerc__Index3	Intermediate monocytes (CD14+CD16+)_ParentalPercentage	2.38252e-05	0.994028
rs6547853	G	CD14+CD16+_LMI1_parentPerc__Index3	Intermediate monocytes (CD14+CD16+)_ParentalPercentage	-1.76324e-05	0.994837
rs56994090	T	CD19+CD20-Plasmablasts/cells_LMI3_grandparentPerc__Index46	CD19+ CD20- Plasma blasts/cells_GrandParentalPercentage	-0.000391378	0.0151142
rs11203203	A	CD19+CD20-Plasmablasts/cells_LMI3_grandparentPerc__Index46	CD19+ CD20- Plasma blasts/cells_GrandParentalPercentage	0.000306919	0.0226067
rs9272346	G	CD19+CD20-Plasmablasts/cells_LMI3_grandparentPerc__Index46	CD19+ CD20- Plasma blasts/cells_GrandParentalPercentage	-0.000398621	0.0255225
rs4788084	C	CD19+CD20-Plasmablasts/cells_LMI3_grandparentPerc__Index46	CD19+ CD20- Plasma blasts/cells_GrandParentalPercentage	-0.000268241	0.0453527
rs72928038	A	CD19+CD20-Plasmablasts/cells_LMI3_grandparentPerc__Index46	CD19+ CD20- Plasma blasts/cells_GrandParentalPercentage	-0.000362595	0.0459779
rs516246	T	CD19+CD20-Plasmablasts/cells_LMI3_grandparentPerc__Index46	CD19+ CD20- Plasma blasts/cells_GrandParentalPercentage	0.000231448	0.0686371
rs4849135	G	CD19+CD20-Plasmablasts/cells_LMI3_grandparentPerc__Index46	CD19+ CD20- Plasma blasts/cells_GrandParentalPercentage	0.000254131	0.0853511
rs2290400	C	CD19+CD20-Plasmablasts/cells_LMI3_grandparentPerc__Index46	CD19+ CD20- Plasma blasts/cells_GrandParentalPercentage	0.000214243	0.13134
rs11258747	T	CD19+CD20-Plasmablasts/cells_LMI3_grandparentPerc__Index46	CD19+ CD20- Plasma blasts/cells_GrandParentalPercentage	-0.000215131	0.151121
rs2292239	T	CD19+CD20-Plasmablasts/cells_LMI3_grandparentPerc__Index46	CD19+ CD20- Plasma blasts/cells_GrandParentalPercentage	0.000189373	0.156189
rs10137082	C	CD19+CD20-Plasmablasts/cells_LMI3_grandparentPerc__Index46	CD19+ CD20- Plasma blasts/cells_GrandParentalPercentage	-0.000211169	0.161762
rs3087243	G	CD19+CD20-Plasmablasts/cells_LMI3_grandparentPerc__Index46	CD19+ CD20- Plasma blasts/cells_GrandParentalPercentage	0.000182046	0.186372
rs11574435	C	CD19+CD20-Plasmablasts/cells_LMI3_grandparentPerc__Index46	CD19+ CD20- Plasma blasts/cells_GrandParentalPercentage	-0.000328671	0.196447
rs2165738	C	CD19+CD20-Plasmablasts/cells_LMI3_grandparentPerc__Index46	CD19+ CD20- Plasma blasts/cells_GrandParentalPercentage	-0.000201933	0.207359
rs9388489	G	CD19+CD20-Plasmablasts/cells_LMI3_grandparentPerc__Index46	CD19+ CD20- Plasma blasts/cells_GrandParentalPercentage	0.000156658	0.220527
rs13415583	T	CD19+CD20-Plasmablasts/cells_LMI3_grandparentPerc__Index46	CD19+ CD20- Plasma blasts/cells_GrandParentalPercentage	-0.000182109	0.232067
rs16956936	C	CD19+CD20-Plasmablasts/cells_LMI3_grandparentPerc__Index46	CD19+ CD20- Plasma blasts/cells_GrandParentalPercentage	0.000233055	0.271185
rs17166496	G	CD19+CD20-Plasmablasts/cells_LMI3_grandparentPerc__Index46	CD19+ CD20- Plasma blasts/cells_GrandParentalPercentage	0.000165742	0.271984
rs10517086	A	CD19+CD20-Plasmablasts/cells_LMI3_grandparentPerc__Index46	CD19+ CD20- Plasma blasts/cells_GrandParentalPercentage	-0.000133419	0.335416
rs12679857	A	CD19+CD20-Plasmablasts/cells_LMI3_grandparentPerc__Index46	CD19+ CD20- Plasma blasts/cells_GrandParentalPercentage	-0.000123511	0.387495
rs3825932	T	CD19+CD20-Plasmablasts/cells_LMI3_grandparentPerc__Index46	CD19+ CD20- Plasma blasts/cells_GrandParentalPercentage	0.000119396	0.392681
rs72727394	T	CD19+CD20-Plasmablasts/cells_LMI3_grandparentPerc__Index46	CD19+ CD20- Plasma blasts/cells_GrandParentalPercentage	0.000137068	0.393637
rs7202877	G	CD19+CD20-Plasmablasts/cells_LMI3_grandparentPerc__Index46	CD19+ CD20- Plasma blasts/cells_GrandParentalPercentage	0.000173301	0.40163
rs7020673	G	CD19+CD20-Plasmablasts/cells_LMI3_grandparentPerc__Index46	CD19+ CD20- Plasma blasts/cells_GrandParentalPercentage	-0.000108691	0.410215
rs4505848	G	CD19+CD20-Plasmablasts/cells_LMI3_grandparentPerc__Index46	CD19+ CD20- Plasma blasts/cells_GrandParentalPercentage	0.000102448	0.428991
rs924043	C	CD19+CD20-Plasmablasts/cells_LMI3_grandparentPerc__Index46	CD19+ CD20- Plasma blasts/cells_GrandParentalPercentage	0.000154531	0.429637
rs478222	A	CD19+CD20-Plasmablasts/cells_LMI3_grandparentPerc__Index46	CD19+ CD20- Plasma blasts/cells_GrandParentalPercentage	9.33031e-05	0.451187
rs653178	C	CD19+CD20-Plasmablasts/cells_LMI3_grandparentPerc__Index46	CD19+ CD20- Plasma blasts/cells_GrandParentalPercentage	-9.54346e-05	0.453416
rs2476601	A	CD19+CD20-Plasmablasts/cells_LMI3_grandparentPerc__Index46	CD19+ CD20- Plasma blasts/cells_GrandParentalPercentage	-0.000116546	0.49257
rs9585056	C	CD19+CD20-Plasmablasts/cells_LMI3_grandparentPerc__Index46	CD19+ CD20- Plasma blasts/cells_GrandParentalPercentage	0.000104507	0.507584
rs1052553	A	CD19+CD20-Plasmablasts/cells_LMI3_grandparentPerc__Index46	CD19+ CD20- Plasma blasts/cells_GrandParentalPercentage	0.000105066	0.515786
rs2304256	C	CD19+CD20-Plasmablasts/cells_LMI3_grandparentPerc__Index46	CD19+ CD20- Plasma blasts/cells_GrandParentalPercentage	-9.75966e-05	0.518611
rs550448	A	CD19+CD20-Plasmablasts/cells_LMI3_grandparentPerc__Index46	CD19+ CD20- Plasma blasts/cells_GrandParentalPercentage	0.000126192	0.546414
rs1465788	C	CD19+CD20-Plasmablasts/cells_LMI3_grandparentPerc__Index46	CD19+ CD20- Plasma blasts/cells_GrandParentalPercentage	9.10954e-05	0.550726
rs1893217	G	CD19+CD20-Plasmablasts/cells_LMI3_grandparentPerc__Index46	CD19+ CD20- Plasma blasts/cells_GrandParentalPercentage	-9.25239e-05	0.573084
rs2611215	A	CD19+CD20-Plasmablasts/cells_LMI3_grandparentPerc__Index46	CD19+ CD20- Plasma blasts/cells_GrandParentalPercentage	-9.22843e-05	0.574906
rs11954020	G	CD19+CD20-Plasmablasts/cells_LMI3_grandparentPerc__Index46	CD19+ CD20- Plasma blasts/cells_GrandParentalPercentage	-7.07927e-05	0.593921
rs5753037	T	CD19+CD20-Plasmablasts/cells_LMI3_grandparentPerc__Index46	CD19+ CD20- Plasma blasts/cells_GrandParentalPercentage	-6.42294e-05	0.640664
rs4900384	G	CD19+CD20-Plasmablasts/cells_LMI3_grandparentPerc__Index46	CD19+ CD20- Plasma blasts/cells_GrandParentalPercentage	6.47409e-05	0.662607
rs2281808	C	CD19+CD20-Plasmablasts/cells_LMI3_grandparentPerc__Index46	CD19+ CD20- Plasma blasts/cells_GrandParentalPercentage	-6.18822e-05	0.663595
rs1534422	G	CD19+CD20-Plasmablasts/cells_LMI3_grandparentPerc__Index46	CD19+ CD20- Plasma blasts/cells_GrandParentalPercentage	-6.16625e-05	0.66928
rs1990760	T	CD19+CD20-Plasmablasts/cells_LMI3_grandparentPerc__Index46	CD19+ CD20- Plasma blasts/cells_GrandParentalPercentage	-5.87159e-05	0.67604
rs1615504	T	CD19+CD20-Plasmablasts/cells_LMI3_grandparentPerc__Index46	CD19+ CD20- Plasma blasts/cells_GrandParentalPercentage	-5.8822e-05	0.684595
rs425105	T	CD19+CD20-Plasmablasts/cells_LMI3_grandparentPerc__Index46	CD19+ CD20- Plasma blasts/cells_GrandParentalPercentage	-6.81923e-05	0.717988
rs10795791	G	CD19+CD20-Plasmablasts/cells_LMI3_grandparentPerc__Index46	CD19+ CD20- Plasma blasts/cells_GrandParentalPercentage	4.81846e-05	0.728293
rs1983853	C	CD19+CD20-Plasmablasts/cells_LMI3_grandparentPerc__Index46	CD19+ CD20- Plasma blasts/cells_GrandParentalPercentage	-8.66197e-05	0.734424
rs3024505	G	CD19+CD20-Plasmablasts/cells_LMI3_grandparentPerc__Index46	CD19+ CD20- Plasma blasts/cells_GrandParentalPercentage	-5.91204e-05	0.757458
rs62447205	A	CD19+CD20-Plasmablasts/cells_LMI3_grandparentPerc__Index46	CD19+ CD20- Plasma blasts/cells_GrandParentalPercentage	4.58259e-05	0.75768
rs10786436	T	CD19+CD20-Plasmablasts/cells_LMI3_grandparentPerc__Index46	CD19+ CD20- Plasma blasts/cells_GrandParentalPercentage	4.20491e-05	0.775314
rs12444268	A	CD19+CD20-Plasmablasts/cells_LMI3_grandparentPerc__Index46	CD19+ CD20- Plasma blasts/cells_GrandParentalPercentage	-4.94957e-05	0.777404
rs6518350	A	CD19+CD20-Plasmablasts/cells_LMI3_grandparentPerc__Index46	CD19+ CD20- Plasma blasts/cells_GrandParentalPercentage	-4.82682e-05	0.798343
rs7804356	T	CD19+CD20-Plasmablasts/cells_LMI3_grandparentPerc__Index46	CD19+ CD20- Plasma blasts/cells_GrandParentalPercentage	-3.3506e-05	0.829963
rs12927355	C	CD19+CD20-Plasmablasts/cells_LMI3_grandparentPerc__Index46	CD19+ CD20- Plasma blasts/cells_GrandParentalPercentage	-2.90686e-05	0.837306
rs193778	G	CD19+CD20-Plasmablasts/cells_LMI3_grandparentPerc__Index46	CD19+ CD20- Plasma blasts/cells_GrandParentalPercentage	-2.77947e-05	0.848032
rs539514	T	CD19+CD20-Plasmablasts/cells_LMI3_grandparentPerc__Index46	CD19+ CD20- Plasma blasts/cells_GrandParentalPercentage	-1.90339e-05	0.886064
rs947474	A	CD19+CD20-Plasmablasts/cells_LMI3_grandparentPerc__Index46	CD19+ CD20- Plasma blasts/cells_GrandParentalPercentage	-2.07141e-05	0.895354
rs6691977	C	CD19+CD20-Plasmablasts/cells_LMI3_grandparentPerc__Index46	CD19+ CD20- Plasma blasts/cells_GrandParentalPercentage	2.02147e-05	0.900795
rs10509540	T	CD19+CD20-Plasmablasts/cells_LMI3_grandparentPerc__Index46	CD19+ CD20- Plasma blasts/cells_GrandParentalPercentage	1.46127e-05	0.916213
rs229533	C	CD19+CD20-Plasmablasts/cells_LMI3_grandparentPerc__Index46	CD19+ CD20- Plasma blasts/cells_GrandParentalPercentage	-9.70441e-06	0.944023
rs6547853	G	CD19+CD20-Plasmablasts/cells_LMI3_grandparentPerc__Index46	CD19+ CD20- Plasma blasts/cells_GrandParentalPercentage	7.90689e-06	0.951258
rs4763879	A	CD19+CD20-Plasmablasts/cells_LMI3_grandparentPerc__Index46	CD19+ CD20- Plasma blasts/cells_GrandParentalPercentage	-7.87249e-06	0.951811
rs689	T	CD19+CD20-Plasmablasts/cells_LMI3_grandparentPerc__Index46	CD19+ CD20- Plasma blasts/cells_GrandParentalPercentage	-2.4651e-06	0.989608
rs2269241	C	CD19+CD20-Plasmablasts/cells_LMI3_grandparentPerc__Index46	CD19+ CD20- Plasma blasts/cells_GrandParentalPercentage	3.59742e-07	0.998547
rs56994090	T	CD19+CD20-Plasmablasts/cells_LMI3_parentPerc__Index47	CD19+ CD20- Plasma blasts/cells_ParentalPercentage	-0.02331	0.00029621
rs11258747	T	CD19+CD20-Plasmablasts/cells_LMI3_parentPerc__Index47	CD19+ CD20- Plasma blasts/cells_ParentalPercentage	-0.0137043	0.0228628
rs4849135	G	CD19+CD20-Plasmablasts/cells_LMI3_parentPerc__Index47	CD19+ CD20- Plasma blasts/cells_ParentalPercentage	0.0130156	0.0285734
rs4788084	C	CD19+CD20-Plasmablasts/cells_LMI3_parentPerc__Index47	CD19+ CD20- Plasma blasts/cells_ParentalPercentage	-0.0111933	0.0383452
rs9272346	G	CD19+CD20-Plasmablasts/cells_LMI3_parentPerc__Index47	CD19+ CD20- Plasma blasts/cells_ParentalPercentage	-0.0140359	0.0515594
rs924043	C	CD19+CD20-Plasmablasts/cells_LMI3_parentPerc__Index47	CD19+ CD20- Plasma blasts/cells_ParentalPercentage	0.0136318	0.0832292
rs72928038	A	CD19+CD20-Plasmablasts/cells_LMI3_parentPerc__Index47	CD19+ CD20- Plasma blasts/cells_ParentalPercentage	-0.0124752	0.0891475
rs12927355	C	CD19+CD20-Plasmablasts/cells_LMI3_parentPerc__Index47	CD19+ CD20- Plasma blasts/cells_ParentalPercentage	-0.00945102	0.096799
rs72727394	T	CD19+CD20-Plasmablasts/cells_LMI3_parentPerc__Index47	CD19+ CD20- Plasma blasts/cells_ParentalPercentage	0.0103337	0.110066
rs3825932	T	CD19+CD20-Plasmablasts/cells_LMI3_parentPerc__Index47	CD19+ CD20- Plasma blasts/cells_ParentalPercentage	0.00850542	0.130426
rs2292239	T	CD19+CD20-Plasmablasts/cells_LMI3_parentPerc__Index47	CD19+ CD20- Plasma blasts/cells_ParentalPercentage	0.00757068	0.159923
rs2290400	C	CD19+CD20-Plasmablasts/cells_LMI3_parentPerc__Index47	CD19+ CD20- Plasma blasts/cells_ParentalPercentage	0.00702965	0.220118
rs2476601	A	CD19+CD20-Plasmablasts/cells_LMI3_parentPerc__Index47	CD19+ CD20- Plasma blasts/cells_ParentalPercentage	-0.008215	0.229915
rs10517086	A	CD19+CD20-Plasmablasts/cells_LMI3_parentPerc__Index47	CD19+ CD20- Plasma blasts/cells_ParentalPercentage	-0.00628014	0.260784
rs9585056	C	CD19+CD20-Plasmablasts/cells_LMI3_parentPerc__Index47	CD19+ CD20- Plasma blasts/cells_ParentalPercentage	0.00698739	0.271624
rs539514	T	CD19+CD20-Plasmablasts/cells_LMI3_parentPerc__Index47	CD19+ CD20- Plasma blasts/cells_ParentalPercentage	0.00582437	0.276361
rs689	T	CD19+CD20-Plasmablasts/cells_LMI3_parentPerc__Index47	CD19+ CD20- Plasma blasts/cells_ParentalPercentage	-0.00798778	0.294758
rs1052553	A	CD19+CD20-Plasmablasts/cells_LMI3_parentPerc__Index47	CD19+ CD20- Plasma blasts/cells_ParentalPercentage	0.00676807	0.298971
rs10137082	C	CD19+CD20-Plasmablasts/cells_LMI3_parentPerc__Index47	CD19+ CD20- Plasma blasts/cells_ParentalPercentage	-0.00578199	0.342846
rs229533	C	CD19+CD20-Plasmablasts/cells_LMI3_parentPerc__Index47	CD19+ CD20- Plasma blasts/cells_ParentalPercentage	-0.00493894	0.375209
rs3024505	G	CD19+CD20-Plasmablasts/cells_LMI3_parentPerc__Index47	CD19+ CD20- Plasma blasts/cells_ParentalPercentage	-0.00647687	0.401259
rs1615504	T	CD19+CD20-Plasmablasts/cells_LMI3_parentPerc__Index47	CD19+ CD20- Plasma blasts/cells_ParentalPercentage	-0.00485891	0.405198
rs11954020	G	CD19+CD20-Plasmablasts/cells_LMI3_parentPerc__Index47	CD19+ CD20- Plasma blasts/cells_ParentalPercentage	-0.00420848	0.431814
rs9388489	G	CD19+CD20-Plasmablasts/cells_LMI3_parentPerc__Index47	CD19+ CD20- Plasma blasts/cells_ParentalPercentage	0.00404117	0.433831
rs516246	T	CD19+CD20-Plasmablasts/cells_LMI3_parentPerc__Index47	CD19+ CD20- Plasma blasts/cells_ParentalPercentage	0.00396199	0.441192
rs653178	C	CD19+CD20-Plasmablasts/cells_LMI3_parentPerc__Index47	CD19+ CD20- Plasma blasts/cells_ParentalPercentage	-0.0039174	0.445479
rs12444268	A	CD19+CD20-Plasmablasts/cells_LMI3_parentPerc__Index47	CD19+ CD20- Plasma blasts/cells_ParentalPercentage	-0.00506647	0.472885
rs2611215	A	CD19+CD20-Plasmablasts/cells_LMI3_parentPerc__Index47	CD19+ CD20- Plasma blasts/cells_ParentalPercentage	-0.00475972	0.47319
rs7020673	G	CD19+CD20-Plasmablasts/cells_LMI3_parentPerc__Index47	CD19+ CD20- Plasma blasts/cells_ParentalPercentage	-0.0036723	0.49043
rs17166496	G	CD19+CD20-Plasmablasts/cells_LMI3_parentPerc__Index47	CD19+ CD20- Plasma blasts/cells_ParentalPercentage	0.00419789	0.490726
rs62447205	A	CD19+CD20-Plasmablasts/cells_LMI3_parentPerc__Index47	CD19+ CD20- Plasma blasts/cells_ParentalPercentage	0.00402094	0.501948
rs1893217	G	CD19+CD20-Plasmablasts/cells_LMI3_parentPerc__Index47	CD19+ CD20- Plasma blasts/cells_ParentalPercentage	-0.00419151	0.526768
rs193778	G	CD19+CD20-Plasmablasts/cells_LMI3_parentPerc__Index47	CD19+ CD20- Plasma blasts/cells_ParentalPercentage	0.00367672	0.529538
rs1983853	C	CD19+CD20-Plasmablasts/cells_LMI3_parentPerc__Index47	CD19+ CD20- Plasma blasts/cells_ParentalPercentage	-0.00630918	0.540017
rs16956936	C	CD19+CD20-Plasmablasts/cells_LMI3_parentPerc__Index47	CD19+ CD20- Plasma blasts/cells_ParentalPercentage	0.00509959	0.550985
rs6691977	C	CD19+CD20-Plasmablasts/cells_LMI3_parentPerc__Index47	CD19+ CD20- Plasma blasts/cells_ParentalPercentage	0.00384385	0.55661
rs6518350	A	CD19+CD20-Plasmablasts/cells_LMI3_parentPerc__Index47	CD19+ CD20- Plasma blasts/cells_ParentalPercentage	-0.00436763	0.566424
rs13415583	T	CD19+CD20-Plasmablasts/cells_LMI3_parentPerc__Index47	CD19+ CD20- Plasma blasts/cells_ParentalPercentage	-0.00350418	0.569133
rs2281808	C	CD19+CD20-Plasmablasts/cells_LMI3_parentPerc__Index47	CD19+ CD20- Plasma blasts/cells_ParentalPercentage	-0.00316208	0.581581
rs11574435	C	CD19+CD20-Plasmablasts/cells_LMI3_parentPerc__Index47	CD19+ CD20- Plasma blasts/cells_ParentalPercentage	-0.00497538	0.628431
rs7202877	G	CD19+CD20-Plasmablasts/cells_LMI3_parentPerc__Index47	CD19+ CD20- Plasma blasts/cells_ParentalPercentage	0.00396887	0.634136
rs7804356	T	CD19+CD20-Plasmablasts/cells_LMI3_parentPerc__Index47	CD19+ CD20- Plasma blasts/cells_ParentalPercentage	0.00296582	0.637388
rs2165738	C	CD19+CD20-Plasmablasts/cells_LMI3_parentPerc__Index47	CD19+ CD20- Plasma blasts/cells_ParentalPercentage	-0.00304272	0.638197
rs12679857	A	CD19+CD20-Plasmablasts/cells_LMI3_parentPerc__Index47	CD19+ CD20- Plasma blasts/cells_ParentalPercentage	-0.0026501	0.645958
rs11203203	A	CD19+CD20-Plasmablasts/cells_LMI3_parentPerc__Index47	CD19+ CD20- Plasma blasts/cells_ParentalPercentage	0.00226907	0.677878
rs947474	A	CD19+CD20-Plasmablasts/cells_LMI3_parentPerc__Index47	CD19+ CD20- Plasma blasts/cells_ParentalPercentage	-0.00249316	0.694655
rs1465788	C	CD19+CD20-Plasmablasts/cells_LMI3_parentPerc__Index47	CD19+ CD20- Plasma blasts/cells_ParentalPercentage	0.00241441	0.695085
rs2304256	C	CD19+CD20-Plasmablasts/cells_LMI3_parentPerc__Index47	CD19+ CD20- Plasma blasts/cells_ParentalPercentage	0.00231273	0.704625
rs6547853	G	CD19+CD20-Plasmablasts/cells_LMI3_parentPerc__Index47	CD19+ CD20- Plasma blasts/cells_ParentalPercentage	0.00185661	0.721921
rs3087243	G	CD19+CD20-Plasmablasts/cells_LMI3_parentPerc__Index47	CD19+ CD20- Plasma blasts/cells_ParentalPercentage	0.00182619	0.742933
rs10786436	T	CD19+CD20-Plasmablasts/cells_LMI3_parentPerc__Index47	CD19+ CD20- Plasma blasts/cells_ParentalPercentage	-0.00176509	0.766435
rs478222	A	CD19+CD20-Plasmablasts/cells_LMI3_parentPerc__Index47	CD19+ CD20- Plasma blasts/cells_ParentalPercentage	0.00129641	0.795344
rs10509540	T	CD19+CD20-Plasmablasts/cells_LMI3_parentPerc__Index47	CD19+ CD20- Plasma blasts/cells_ParentalPercentage	0.00135553	0.808813
rs4763879	A	CD19+CD20-Plasmablasts/cells_LMI3_parentPerc__Index47	CD19+ CD20- Plasma blasts/cells_ParentalPercentage	-0.000837218	0.873406
rs425105	T	CD19+CD20-Plasmablasts/cells_LMI3_parentPerc__Index47	CD19+ CD20- Plasma blasts/cells_ParentalPercentage	0.00109258	0.885949
rs4900384	G	CD19+CD20-Plasmablasts/cells_LMI3_parentPerc__Index47	CD19+ CD20- Plasma blasts/cells_ParentalPercentage	-0.000835149	0.889049
rs4505848	G	CD19+CD20-Plasmablasts/cells_LMI3_parentPerc__Index47	CD19+ CD20- Plasma blasts/cells_ParentalPercentage	0.000716423	0.891016
rs2269241	C	CD19+CD20-Plasmablasts/cells_LMI3_parentPerc__Index47	CD19+ CD20- Plasma blasts/cells_ParentalPercentage	-0.000729897	0.926993
rs1534422	G	CD19+CD20-Plasmablasts/cells_LMI3_parentPerc__Index47	CD19+ CD20- Plasma blasts/cells_ParentalPercentage	-0.000523465	0.928386
rs550448	A	CD19+CD20-Plasmablasts/cells_LMI3_parentPerc__Index47	CD19+ CD20- Plasma blasts/cells_ParentalPercentage	0.000542982	0.948723
rs10795791	G	CD19+CD20-Plasmablasts/cells_LMI3_parentPerc__Index47	CD19+ CD20- Plasma blasts/cells_ParentalPercentage	0.00035832	0.948941
rs1990760	T	CD19+CD20-Plasmablasts/cells_LMI3_parentPerc__Index47	CD19+ CD20- Plasma blasts/cells_ParentalPercentage	-0.000331434	0.953378
rs5753037	T	CD19+CD20-Plasmablasts/cells_LMI3_parentPerc__Index47	CD19+ CD20- Plasma blasts/cells_ParentalPercentage	0.000183631	0.973615
rs56994090	T	CD19+CD20+Bcells_LMI3_grandparentPerc__Index46	CD19+ CD20+ B cells_GrandParentalPercentage	0.00980455	0.00065179
rs11203203	A	CD19+CD20+Bcells_LMI3_grandparentPerc__Index46	CD19+ CD20+ B cells_GrandParentalPercentage	0.00650156	0.0070743
rs924043	C	CD19+CD20+Bcells_LMI3_grandparentPerc__Index46	CD19+ CD20+ B cells_GrandParentalPercentage	-0.00647	0.0649395
rs3087243	G	CD19+CD20+Bcells_LMI3_grandparentPerc__Index46	CD19+ CD20+ B cells_GrandParentalPercentage	0.00444657	0.0720801
rs689	T	CD19+CD20+Bcells_LMI3_grandparentPerc__Index46	CD19+ CD20+ B cells_GrandParentalPercentage	0.00593462	0.0799825
rs12927355	C	CD19+CD20+Bcells_LMI3_grandparentPerc__Index46	CD19+ CD20+ B cells_GrandParentalPercentage	0.00440932	0.0820552
rs11258747	T	CD19+CD20+Bcells_LMI3_grandparentPerc__Index46	CD19+ CD20+ B cells_GrandParentalPercentage	0.00457057	0.0894556
rs72727394	T	CD19+CD20+Bcells_LMI3_grandparentPerc__Index46	CD19+ CD20+ B cells_GrandParentalPercentage	-0.00482814	0.0938032
rs229533	C	CD19+CD20+Bcells_LMI3_grandparentPerc__Index46	CD19+ CD20+ B cells_GrandParentalPercentage	0.00366528	0.139116
rs2476601	A	CD19+CD20+Bcells_LMI3_grandparentPerc__Index46	CD19+ CD20+ B cells_GrandParentalPercentage	0.00445434	0.143774
rs193778	G	CD19+CD20+Bcells_LMI3_grandparentPerc__Index46	CD19+ CD20+ B cells_GrandParentalPercentage	-0.00354761	0.172704
rs539514	T	CD19+CD20+Bcells_LMI3_grandparentPerc__Index46	CD19+ CD20+ B cells_GrandParentalPercentage	-0.00318009	0.182035
rs4763879	A	CD19+CD20+Bcells_LMI3_grandparentPerc__Index46	CD19+ CD20+ B cells_GrandParentalPercentage	0.00310455	0.184011
rs11574435	C	CD19+CD20+Bcells_LMI3_grandparentPerc__Index46	CD19+ CD20+ B cells_GrandParentalPercentage	-0.00600288	0.189367
rs425105	T	CD19+CD20+Bcells_LMI3_grandparentPerc__Index46	CD19+ CD20+ B cells_GrandParentalPercentage	-0.0044387	0.190144
rs4900384	G	CD19+CD20+Bcells_LMI3_grandparentPerc__Index46	CD19+ CD20+ B cells_GrandParentalPercentage	0.00318884	0.231202
rs2304256	C	CD19+CD20+Bcells_LMI3_grandparentPerc__Index46	CD19+ CD20+ B cells_GrandParentalPercentage	-0.00323757	0.233039
rs7202877	G	CD19+CD20+Bcells_LMI3_grandparentPerc__Index46	CD19+ CD20+ B cells_GrandParentalPercentage	0.00421921	0.255678
rs947474	A	CD19+CD20+Bcells_LMI3_grandparentPerc__Index46	CD19+ CD20+ B cells_GrandParentalPercentage	0.00306233	0.278722
rs7804356	T	CD19+CD20+Bcells_LMI3_grandparentPerc__Index46	CD19+ CD20+ B cells_GrandParentalPercentage	-0.00293945	0.294028
rs10137082	C	CD19+CD20+Bcells_LMI3_grandparentPerc__Index46	CD19+ CD20+ B cells_GrandParentalPercentage	-0.0028109	0.300713
rs6518350	A	CD19+CD20+Bcells_LMI3_grandparentPerc__Index46	CD19+ CD20+ B cells_GrandParentalPercentage	0.00346199	0.307465
rs2165738	C	CD19+CD20+Bcells_LMI3_grandparentPerc__Index46	CD19+ CD20+ B cells_GrandParentalPercentage	-0.00291226	0.312106
rs9585056	C	CD19+CD20+Bcells_LMI3_grandparentPerc__Index46	CD19+ CD20+ B cells_GrandParentalPercentage	-0.00286286	0.312301
rs550448	A	CD19+CD20+Bcells_LMI3_grandparentPerc__Index46	CD19+ CD20+ B cells_GrandParentalPercentage	0.00373652	0.320136
rs3825932	T	CD19+CD20+Bcells_LMI3_grandparentPerc__Index46	CD19+ CD20+ B cells_GrandParentalPercentage	-0.00239711	0.339668
rs16956936	C	CD19+CD20+Bcells_LMI3_grandparentPerc__Index46	CD19+ CD20+ B cells_GrandParentalPercentage	0.00340928	0.370817
rs9388489	G	CD19+CD20+Bcells_LMI3_grandparentPerc__Index46	CD19+ CD20+ B cells_GrandParentalPercentage	0.00197654	0.390319
rs2281808	C	CD19+CD20+Bcells_LMI3_grandparentPerc__Index46	CD19+ CD20+ B cells_GrandParentalPercentage	0.00206467	0.419261
rs516246	T	CD19+CD20+Bcells_LMI3_grandparentPerc__Index46	CD19+ CD20+ B cells_GrandParentalPercentage	0.00168462	0.462498
rs1052553	A	CD19+CD20+Bcells_LMI3_grandparentPerc__Index46	CD19+ CD20+ B cells_GrandParentalPercentage	-0.00209099	0.471825
rs4505848	G	CD19+CD20+Bcells_LMI3_grandparentPerc__Index46	CD19+ CD20+ B cells_GrandParentalPercentage	0.00156815	0.500761
rs2269241	C	CD19+CD20+Bcells_LMI3_grandparentPerc__Index46	CD19+ CD20+ B cells_GrandParentalPercentage	0.00234263	0.509124
rs13415583	T	CD19+CD20+Bcells_LMI3_grandparentPerc__Index46	CD19+ CD20+ B cells_GrandParentalPercentage	-0.00175943	0.52122
rs6547853	G	CD19+CD20+Bcells_LMI3_grandparentPerc__Index46	CD19+ CD20+ B cells_GrandParentalPercentage	-0.0013345	0.565887
rs4849135	G	CD19+CD20+Bcells_LMI3_grandparentPerc__Index46	CD19+ CD20+ B cells_GrandParentalPercentage	-0.00149843	0.573784
rs72928038	A	CD19+CD20+Bcells_LMI3_grandparentPerc__Index46	CD19+ CD20+ B cells_GrandParentalPercentage	0.00177679	0.588135
rs5753037	T	CD19+CD20+Bcells_LMI3_grandparentPerc__Index46	CD19+ CD20+ B cells_GrandParentalPercentage	-0.0012465	0.614317
rs1615504	T	CD19+CD20+Bcells_LMI3_grandparentPerc__Index46	CD19+ CD20+ B cells_GrandParentalPercentage	0.00119466	0.646282
rs10786436	T	CD19+CD20+Bcells_LMI3_grandparentPerc__Index46	CD19+ CD20+ B cells_GrandParentalPercentage	0.00113626	0.667851
rs3024505	G	CD19+CD20+Bcells_LMI3_grandparentPerc__Index46	CD19+ CD20+ B cells_GrandParentalPercentage	0.00141582	0.680756
rs10517086	A	CD19+CD20+Bcells_LMI3_grandparentPerc__Index46	CD19+ CD20+ B cells_GrandParentalPercentage	0.00101386	0.684151
rs1983853	C	CD19+CD20+Bcells_LMI3_grandparentPerc__Index46	CD19+ CD20+ B cells_GrandParentalPercentage	0.00183468	0.689357
rs4788084	C	CD19+CD20+Bcells_LMI3_grandparentPerc__Index46	CD19+ CD20+ B cells_GrandParentalPercentage	0.000911119	0.706633
rs1893217	G	CD19+CD20+Bcells_LMI3_grandparentPerc__Index46	CD19+ CD20+ B cells_GrandParentalPercentage	0.00105838	0.719979
rs9272346	G	CD19+CD20+Bcells_LMI3_grandparentPerc__Index46	CD19+ CD20+ B cells_GrandParentalPercentage	0.00113377	0.725375
rs62447205	A	CD19+CD20+Bcells_LMI3_grandparentPerc__Index46	CD19+ CD20+ B cells_GrandParentalPercentage	-0.000896641	0.737015
rs12444268	A	CD19+CD20+Bcells_LMI3_grandparentPerc__Index46	CD19+ CD20+ B cells_GrandParentalPercentage	0.000954667	0.761645
rs6691977	C	CD19+CD20+Bcells_LMI3_grandparentPerc__Index46	CD19+ CD20+ B cells_GrandParentalPercentage	0.000876735	0.763587
rs2290400	C	CD19+CD20+Bcells_LMI3_grandparentPerc__Index46	CD19+ CD20+ B cells_GrandParentalPercentage	0.000739487	0.772633
rs2611215	A	CD19+CD20+Bcells_LMI3_grandparentPerc__Index46	CD19+ CD20+ B cells_GrandParentalPercentage	0.000788961	0.789749
rs1990760	T	CD19+CD20+Bcells_LMI3_grandparentPerc__Index46	CD19+ CD20+ B cells_GrandParentalPercentage	-0.000625206	0.80454
rs7020673	G	CD19+CD20+Bcells_LMI3_grandparentPerc__Index46	CD19+ CD20+ B cells_GrandParentalPercentage	0.000573314	0.809206
rs478222	A	CD19+CD20+Bcells_LMI3_grandparentPerc__Index46	CD19+ CD20+ B cells_GrandParentalPercentage	0.000487809	0.826664
rs17166496	G	CD19+CD20+Bcells_LMI3_grandparentPerc__Index46	CD19+ CD20+ B cells_GrandParentalPercentage	-0.000464204	0.864303
rs12679857	A	CD19+CD20+Bcells_LMI3_grandparentPerc__Index46	CD19+ CD20+ B cells_GrandParentalPercentage	0.000392957	0.878552
rs10795791	G	CD19+CD20+Bcells_LMI3_grandparentPerc__Index46	CD19+ CD20+ B cells_GrandParentalPercentage	0.000355218	0.88673
rs653178	C	CD19+CD20+Bcells_LMI3_grandparentPerc__Index46	CD19+ CD20+ B cells_GrandParentalPercentage	0.000315942	0.890259
rs10509540	T	CD19+CD20+Bcells_LMI3_grandparentPerc__Index46	CD19+ CD20+ B cells_GrandParentalPercentage	0.000336516	0.892793
rs1534422	G	CD19+CD20+Bcells_LMI3_grandparentPerc__Index46	CD19+ CD20+ B cells_GrandParentalPercentage	0.000307208	0.90579
rs1465788	C	CD19+CD20+Bcells_LMI3_grandparentPerc__Index46	CD19+ CD20+ B cells_GrandParentalPercentage	9.59396e-05	0.972127
rs2292239	T	CD19+CD20+Bcells_LMI3_grandparentPerc__Index46	CD19+ CD20+ B cells_GrandParentalPercentage	-4.0042e-05	0.986725
rs11954020	G	CD19+CD20+Bcells_LMI3_grandparentPerc__Index46	CD19+ CD20+ B cells_GrandParentalPercentage	3.80873e-05	0.987274
rs56994090	T	CD19+CD20+Bcells_LMI3_parentPerc__Index47	CD19+ CD20+ B cells_ParentalPercentage	0.0233055	0.000296903
rs11258747	T	CD19+CD20+Bcells_LMI3_parentPerc__Index47	CD19+ CD20+ B cells_ParentalPercentage	0.0138112	0.0218039
rs4849135	G	CD19+CD20+Bcells_LMI3_parentPerc__Index47	CD19+ CD20+ B cells_ParentalPercentage	-0.0129185	0.0297906
rs4788084	C	CD19+CD20+Bcells_LMI3_parentPerc__Index47	CD19+ CD20+ B cells_ParentalPercentage	0.0111305	0.0394494
rs9272346	G	CD19+CD20+Bcells_LMI3_parentPerc__Index47	CD19+ CD20+ B cells_ParentalPercentage	0.0140363	0.051546
rs924043	C	CD19+CD20+Bcells_LMI3_parentPerc__Index47	CD19+ CD20+ B cells_ParentalPercentage	-0.0136957	0.0817748
rs72928038	A	CD19+CD20+Bcells_LMI3_parentPerc__Index47	CD19+ CD20+ B cells_ParentalPercentage	0.0126003	0.0859554
rs12927355	C	CD19+CD20+Bcells_LMI3_parentPerc__Index47	CD19+ CD20+ B cells_ParentalPercentage	0.00938291	0.0992348
rs72727394	T	CD19+CD20+Bcells_LMI3_parentPerc__Index47	CD19+ CD20+ B cells_ParentalPercentage	-0.0102809	0.111896
rs3825932	T	CD19+CD20+Bcells_LMI3_parentPerc__Index47	CD19+ CD20+ B cells_ParentalPercentage	-0.00841218	0.134707
rs2292239	T	CD19+CD20+Bcells_LMI3_parentPerc__Index47	CD19+ CD20+ B cells_ParentalPercentage	-0.0077541	0.149983
rs2290400	C	CD19+CD20+Bcells_LMI3_parentPerc__Index47	CD19+ CD20+ B cells_ParentalPercentage	-0.00696424	0.224444
rs2476601	A	CD19+CD20+Bcells_LMI3_parentPerc__Index47	CD19+ CD20+ B cells_ParentalPercentage	0.00828111	0.22616
rs10517086	A	CD19+CD20+Bcells_LMI3_parentPerc__Index47	CD19+ CD20+ B cells_ParentalPercentage	0.00623822	0.263976
rs9585056	C	CD19+CD20+Bcells_LMI3_parentPerc__Index47	CD19+ CD20+ B cells_ParentalPercentage	-0.00684985	0.281185
rs539514	T	CD19+CD20+Bcells_LMI3_parentPerc__Index47	CD19+ CD20+ B cells_ParentalPercentage	-0.00571196	0.28575
rs689	T	CD19+CD20+Bcells_LMI3_parentPerc__Index47	CD19+ CD20+ B cells_ParentalPercentage	0.00807851	0.289279
rs1052553	A	CD19+CD20+Bcells_LMI3_parentPerc__Index47	CD19+ CD20+ B cells_ParentalPercentage	-0.00678557	0.297707
rs10137082	C	CD19+CD20+Bcells_LMI3_parentPerc__Index47	CD19+ CD20+ B cells_ParentalPercentage	0.0056301	0.355688
rs229533	C	CD19+CD20+Bcells_LMI3_parentPerc__Index47	CD19+ CD20+ B cells_ParentalPercentage	0.00487461	0.381459
rs3024505	G	CD19+CD20+Bcells_LMI3_parentPerc__Index47	CD19+ CD20+ B cells_ParentalPercentage	0.00673636	0.382614
rs1615504	T	CD19+CD20+Bcells_LMI3_parentPerc__Index47	CD19+ CD20+ B cells_ParentalPercentage	0.0048152	0.40943
rs9388489	G	CD19+CD20+Bcells_LMI3_parentPerc__Index47	CD19+ CD20+ B cells_ParentalPercentage	-0.00399006	0.439663
rs11954020	G	CD19+CD20+Bcells_LMI3_parentPerc__Index47	CD19+ CD20+ B cells_ParentalPercentage	0.00408632	0.445307
rs516246	T	CD19+CD20+Bcells_LMI3_parentPerc__Index47	CD19+ CD20+ B cells_ParentalPercentage	-0.00391102	0.447085
rs653178	C	CD19+CD20+Bcells_LMI3_parentPerc__Index47	CD19+ CD20+ B cells_ParentalPercentage	0.003754	0.4647
rs12444268	A	CD19+CD20+Bcells_LMI3_parentPerc__Index47	CD19+ CD20+ B cells_ParentalPercentage	0.00514232	0.466262
rs2611215	A	CD19+CD20+Bcells_LMI3_parentPerc__Index47	CD19+ CD20+ B cells_ParentalPercentage	0.00483421	0.466272
rs62447205	A	CD19+CD20+Bcells_LMI3_parentPerc__Index47	CD19+ CD20+ B cells_ParentalPercentage	-0.00412913	0.490487
rs7020673	G	CD19+CD20+Bcells_LMI3_parentPerc__Index47	CD19+ CD20+ B cells_ParentalPercentage	0.00365699	0.49223
rs17166496	G	CD19+CD20+Bcells_LMI3_parentPerc__Index47	CD19+ CD20+ B cells_ParentalPercentage	-0.00405762	0.505334
rs193778	G	CD19+CD20+Bcells_LMI3_parentPerc__Index47	CD19+ CD20+ B cells_ParentalPercentage	-0.00370805	0.526021
rs1893217	G	CD19+CD20+Bcells_LMI3_parentPerc__Index47	CD19+ CD20+ B cells_ParentalPercentage	0.00414398	0.531459
rs1983853	C	CD19+CD20+Bcells_LMI3_parentPerc__Index47	CD19+ CD20+ B cells_ParentalPercentage	0.00643716	0.531808
rs16956936	C	CD19+CD20+Bcells_LMI3_parentPerc__Index47	CD19+ CD20+ B cells_ParentalPercentage	-0.00518597	0.544242
rs6518350	A	CD19+CD20+Bcells_LMI3_parentPerc__Index47	CD19+ CD20+ B cells_ParentalPercentage	0.00450816	0.553981
rs2281808	C	CD19+CD20+Bcells_LMI3_parentPerc__Index47	CD19+ CD20+ B cells_ParentalPercentage	0.00334714	0.559643
rs6691977	C	CD19+CD20+Bcells_LMI3_parentPerc__Index47	CD19+ CD20+ B cells_ParentalPercentage	-0.00379325	0.561811
rs13415583	T	CD19+CD20+Bcells_LMI3_parentPerc__Index47	CD19+ CD20+ B cells_ParentalPercentage	0.0034408	0.576135
rs11574435	C	CD19+CD20+Bcells_LMI3_parentPerc__Index47	CD19+ CD20+ B cells_ParentalPercentage	0.00516968	0.615062
rs12679857	A	CD19+CD20+Bcells_LMI3_parentPerc__Index47	CD19+ CD20+ B cells_ParentalPercentage	0.002814	0.625674
rs2165738	C	CD19+CD20+Bcells_LMI3_parentPerc__Index47	CD19+ CD20+ B cells_ParentalPercentage	0.00311333	0.630407
rs7202877	G	CD19+CD20+Bcells_LMI3_parentPerc__Index47	CD19+ CD20+ B cells_ParentalPercentage	-0.00391018	0.639151
rs7804356	T	CD19+CD20+Bcells_LMI3_parentPerc__Index47	CD19+ CD20+ B cells_ParentalPercentage	-0.00284715	0.650911
rs11203203	A	CD19+CD20+Bcells_LMI3_parentPerc__Index47	CD19+ CD20+ B cells_ParentalPercentage	-0.00220892	0.68595
rs1465788	C	CD19+CD20+Bcells_LMI3_parentPerc__Index47	CD19+ CD20+ B cells_ParentalPercentage	-0.00242637	0.693643
rs2304256	C	CD19+CD20+Bcells_LMI3_parentPerc__Index47	CD19+ CD20+ B cells_ParentalPercentage	-0.00239745	0.694328
rs947474	A	CD19+CD20+Bcells_LMI3_parentPerc__Index47	CD19+ CD20+ B cells_ParentalPercentage	0.00242657	0.702412
rs6547853	G	CD19+CD20+Bcells_LMI3_parentPerc__Index47	CD19+ CD20+ B cells_ParentalPercentage	-0.00181135	0.728423
rs3087243	G	CD19+CD20+Bcells_LMI3_parentPerc__Index47	CD19+ CD20+ B cells_ParentalPercentage	-0.00166617	0.764761
rs10786436	T	CD19+CD20+Bcells_LMI3_parentPerc__Index47	CD19+ CD20+ B cells_ParentalPercentage	0.00172936	0.771024
rs478222	A	CD19+CD20+Bcells_LMI3_parentPerc__Index47	CD19+ CD20+ B cells_ParentalPercentage	-0.00129424	0.795674
rs10509540	T	CD19+CD20+Bcells_LMI3_parentPerc__Index47	CD19+ CD20+ B cells_ParentalPercentage	-0.00137143	0.806607
rs4900384	G	CD19+CD20+Bcells_LMI3_parentPerc__Index47	CD19+ CD20+ B cells_ParentalPercentage	0.000959732	0.872625
rs425105	T	CD19+CD20+Bcells_LMI3_parentPerc__Index47	CD19+ CD20+ B cells_ParentalPercentage	-0.00114946	0.880051
rs4763879	A	CD19+CD20+Bcells_LMI3_parentPerc__Index47	CD19+ CD20+ B cells_ParentalPercentage	0.000737032	0.888446
rs4505848	G	CD19+CD20+Bcells_LMI3_parentPerc__Index47	CD19+ CD20+ B cells_ParentalPercentage	-0.000709104	0.89212
rs2269241	C	CD19+CD20+Bcells_LMI3_parentPerc__Index47	CD19+ CD20+ B cells_ParentalPercentage	0.000694339	0.930539
rs10795791	G	CD19+CD20+Bcells_LMI3_parentPerc__Index47	CD19+ CD20+ B cells_ParentalPercentage	-0.000479083	0.931767
rs1534422	G	CD19+CD20+Bcells_LMI3_parentPerc__Index47	CD19+ CD20+ B cells_ParentalPercentage	0.000494972	0.932273
rs550448	A	CD19+CD20+Bcells_LMI3_parentPerc__Index47	CD19+ CD20+ B cells_ParentalPercentage	-0.000465801	0.956002
rs1990760	T	CD19+CD20+Bcells_LMI3_parentPerc__Index47	CD19+ CD20+ B cells_ParentalPercentage	0.000290224	0.959168
rs5753037	T	CD19+CD20+Bcells_LMI3_parentPerc__Index47	CD19+ CD20+ B cells_ParentalPercentage	-4.71147e-05	0.993229
rs56994090	T	CD24+CD38+_LMI3_grandparentPerc__Index46	CD24+ CD38+_GrandParentalPercentage	0.00890977	0.000389836
rs11203203	A	CD24+CD38+_LMI3_grandparentPerc__Index46	CD24+ CD38+_GrandParentalPercentage	0.00515293	0.0147979
rs924043	C	CD24+CD38+_LMI3_grandparentPerc__Index46	CD24+ CD38+_GrandParentalPercentage	-0.0064366	0.0355216
rs11258747	T	CD24+CD38+_LMI3_grandparentPerc__Index46	CD24+ CD38+_GrandParentalPercentage	0.00437291	0.0629676
rs12927355	C	CD24+CD38+_LMI3_grandparentPerc__Index46	CD24+ CD38+_GrandParentalPercentage	0.00381701	0.0851946
rs689	T	CD24+CD38+_LMI3_grandparentPerc__Index46	CD24+ CD38+_GrandParentalPercentage	0.00508143	0.0865158
rs72727394	T	CD24+CD38+_LMI3_grandparentPerc__Index46	CD24+ CD38+_GrandParentalPercentage	-0.004161	0.0986728
rs3087243	G	CD24+CD38+_LMI3_grandparentPerc__Index46	CD24+ CD38+_GrandParentalPercentage	0.00342233	0.113724
rs539514	T	CD24+CD38+_LMI3_grandparentPerc__Index46	CD24+ CD38+_GrandParentalPercentage	-0.00313705	0.131973
rs425105	T	CD24+CD38+_LMI3_grandparentPerc__Index46	CD24+ CD38+_GrandParentalPercentage	-0.00428276	0.148097
rs2476601	A	CD24+CD38+_LMI3_grandparentPerc__Index46	CD24+ CD38+_GrandParentalPercentage	0.00384477	0.149048
rs11574435	C	CD24+CD38+_LMI3_grandparentPerc__Index46	CD24+ CD38+_GrandParentalPercentage	-0.00570509	0.153584
rs4763879	A	CD24+CD38+_LMI3_grandparentPerc__Index46	CD24+ CD38+_GrandParentalPercentage	0.00277583	0.174296
rs7804356	T	CD24+CD38+_LMI3_grandparentPerc__Index46	CD24+ CD38+_GrandParentalPercentage	-0.0030115	0.21869
rs193778	G	CD24+CD38+_LMI3_grandparentPerc__Index46	CD24+ CD38+_GrandParentalPercentage	-0.00277294	0.223112
rs229533	C	CD24+CD38+_LMI3_grandparentPerc__Index46	CD24+ CD38+_GrandParentalPercentage	0.00256666	0.236673
rs2304256	C	CD24+CD38+_LMI3_grandparentPerc__Index46	CD24+ CD38+_GrandParentalPercentage	-0.00259618	0.274253
rs9585056	C	CD24+CD38+_LMI3_grandparentPerc__Index46	CD24+ CD38+_GrandParentalPercentage	-0.00264673	0.285338
rs2165738	C	CD24+CD38+_LMI3_grandparentPerc__Index46	CD24+ CD38+_GrandParentalPercentage	-0.00268829	0.285879
rs7202877	G	CD24+CD38+_LMI3_grandparentPerc__Index46	CD24+ CD38+_GrandParentalPercentage	0.00343735	0.289702
rs3825932	T	CD24+CD38+_LMI3_grandparentPerc__Index46	CD24+ CD38+_GrandParentalPercentage	-0.00230642	0.293324
rs6518350	A	CD24+CD38+_LMI3_grandparentPerc__Index46	CD24+ CD38+_GrandParentalPercentage	0.00286802	0.333679
rs516246	T	CD24+CD38+_LMI3_grandparentPerc__Index46	CD24+ CD38+_GrandParentalPercentage	0.00192722	0.336206
rs947474	A	CD24+CD38+_LMI3_grandparentPerc__Index46	CD24+ CD38+_GrandParentalPercentage	0.00231659	0.348894
rs4900384	G	CD24+CD38+_LMI3_grandparentPerc__Index46	CD24+ CD38+_GrandParentalPercentage	0.00205408	0.378182
rs550448	A	CD24+CD38+_LMI3_grandparentPerc__Index46	CD24+ CD38+_GrandParentalPercentage	0.00265486	0.419392
rs16956936	C	CD24+CD38+_LMI3_grandparentPerc__Index46	CD24+ CD38+_GrandParentalPercentage	0.00256613	0.441215
rs4849135	G	CD24+CD38+_LMI3_grandparentPerc__Index46	CD24+ CD38+_GrandParentalPercentage	-0.00178507	0.443347
rs10137082	C	CD24+CD38+_LMI3_grandparentPerc__Index46	CD24+ CD38+_GrandParentalPercentage	-0.00180361	0.44789
rs1052553	A	CD24+CD38+_LMI3_grandparentPerc__Index46	CD24+ CD38+_GrandParentalPercentage	-0.00182785	0.471971
rs2281808	C	CD24+CD38+_LMI3_grandparentPerc__Index46	CD24+ CD38+_GrandParentalPercentage	0.00156501	0.483923
rs13415583	T	CD24+CD38+_LMI3_grandparentPerc__Index46	CD24+ CD38+_GrandParentalPercentage	-0.0015161	0.527316
rs478222	A	CD24+CD38+_LMI3_grandparentPerc__Index46	CD24+ CD38+_GrandParentalPercentage	0.00117557	0.546023
rs2269241	C	CD24+CD38+_LMI3_grandparentPerc__Index46	CD24+ CD38+_GrandParentalPercentage	0.00182937	0.555513
rs72928038	A	CD24+CD38+_LMI3_grandparentPerc__Index46	CD24+ CD38+_GrandParentalPercentage	0.00160832	0.575075
rs1983853	C	CD24+CD38+_LMI3_grandparentPerc__Index46	CD24+ CD38+_GrandParentalPercentage	0.00220056	0.583433
rs3024505	G	CD24+CD38+_LMI3_grandparentPerc__Index46	CD24+ CD38+_GrandParentalPercentage	0.00162166	0.589893
rs5753037	T	CD24+CD38+_LMI3_grandparentPerc__Index46	CD24+ CD38+_GrandParentalPercentage	-0.00114597	0.59624
rs10517086	A	CD24+CD38+_LMI3_grandparentPerc__Index46	CD24+ CD38+_GrandParentalPercentage	0.00108591	0.618254
rs4505848	G	CD24+CD38+_LMI3_grandparentPerc__Index46	CD24+ CD38+_GrandParentalPercentage	0.000975131	0.632178
rs17166496	G	CD24+CD38+_LMI3_grandparentPerc__Index46	CD24+ CD38+_GrandParentalPercentage	-0.00111485	0.638728
rs9388489	G	CD24+CD38+_LMI3_grandparentPerc__Index46	CD24+ CD38+_GrandParentalPercentage	0.000796341	0.692458
rs6547853	G	CD24+CD38+_LMI3_grandparentPerc__Index46	CD24+ CD38+_GrandParentalPercentage	-0.000786294	0.698932
rs10795791	G	CD24+CD38+_LMI3_grandparentPerc__Index46	CD24+ CD38+_GrandParentalPercentage	0.000798732	0.714117
rs10786436	T	CD24+CD38+_LMI3_grandparentPerc__Index46	CD24+ CD38+_GrandParentalPercentage	0.000838131	0.717399
rs1615504	T	CD24+CD38+_LMI3_grandparentPerc__Index46	CD24+ CD38+_GrandParentalPercentage	0.000751368	0.741366
rs4788084	C	CD24+CD38+_LMI3_grandparentPerc__Index46	CD24+ CD38+_GrandParentalPercentage	0.000649161	0.759106
rs10509540	T	CD24+CD38+_LMI3_grandparentPerc__Index46	CD24+ CD38+_GrandParentalPercentage	0.000608232	0.780562
rs6691977	C	CD24+CD38+_LMI3_grandparentPerc__Index46	CD24+ CD38+_GrandParentalPercentage	0.000695928	0.784837
rs2290400	C	CD24+CD38+_LMI3_grandparentPerc__Index46	CD24+ CD38+_GrandParentalPercentage	0.000593629	0.790823
rs12444268	A	CD24+CD38+_LMI3_grandparentPerc__Index46	CD24+ CD38+_GrandParentalPercentage	0.000716177	0.7947
rs2611215	A	CD24+CD38+_LMI3_grandparentPerc__Index46	CD24+ CD38+_GrandParentalPercentage	0.000630189	0.807575
rs653178	C	CD24+CD38+_LMI3_grandparentPerc__Index46	CD24+ CD38+_GrandParentalPercentage	0.000485178	0.808533
rs1990760	T	CD24+CD38+_LMI3_grandparentPerc__Index46	CD24+ CD38+_GrandParentalPercentage	-0.000514146	0.815968
rs9272346	G	CD24+CD38+_LMI3_grandparentPerc__Index46	CD24+ CD38+_GrandParentalPercentage	0.000636008	0.821719
rs1893217	G	CD24+CD38+_LMI3_grandparentPerc__Index46	CD24+ CD38+_GrandParentalPercentage	0.000512275	0.842726
rs62447205	A	CD24+CD38+_LMI3_grandparentPerc__Index46	CD24+ CD38+_GrandParentalPercentage	-0.000414569	0.859084
rs12679857	A	CD24+CD38+_LMI3_grandparentPerc__Index46	CD24+ CD38+_GrandParentalPercentage	-0.000264064	0.906522
rs1465788	C	CD24+CD38+_LMI3_grandparentPerc__Index46	CD24+ CD38+_GrandParentalPercentage	-0.00027722	0.90808
rs11954020	G	CD24+CD38+_LMI3_grandparentPerc__Index46	CD24+ CD38+_GrandParentalPercentage	-0.000116125	0.955648
rs2292239	T	CD24+CD38+_LMI3_grandparentPerc__Index46	CD24+ CD38+_GrandParentalPercentage	0.000104086	0.960553
rs1534422	G	CD24+CD38+_LMI3_grandparentPerc__Index46	CD24+ CD38+_GrandParentalPercentage	8.20959e-05	0.971149
rs7020673	G	CD24+CD38+_LMI3_grandparentPerc__Index46	CD24+ CD38+_GrandParentalPercentage	-1.56168e-05	0.993999
rs56994090	T	CD24+CD38+_LMI3_parentPerc__Index47	CD24+ CD38+_ParentalPercentage	0.0210271	0.0130736
rs9388489	G	CD24+CD38+_LMI3_parentPerc__Index47	CD24+ CD38+_ParentalPercentage	-0.0143635	0.0321161
rs924043	C	CD24+CD38+_LMI3_parentPerc__Index47	CD24+ CD38+_ParentalPercentage	-0.0200702	0.050318
rs3825932	T	CD24+CD38+_LMI3_parentPerc__Index47	CD24+ CD38+_ParentalPercentage	-0.0137785	0.0599424
rs425105	T	CD24+CD38+_LMI3_parentPerc__Index47	CD24+ CD38+_ParentalPercentage	-0.0185356	0.0610104
rs11954020	G	CD24+CD38+_LMI3_parentPerc__Index47	CD24+ CD38+_ParentalPercentage	0.0127071	0.0679004
rs1983853	C	CD24+CD38+_LMI3_parentPerc__Index47	CD24+ CD38+_ParentalPercentage	0.0195744	0.144107
rs6547853	G	CD24+CD38+_LMI3_parentPerc__Index47	CD24+ CD38+_ParentalPercentage	0.00938269	0.167014
rs12927355	C	CD24+CD38+_LMI3_parentPerc__Index47	CD24+ CD38+_ParentalPercentage	0.0100105	0.178006
rs2292239	T	CD24+CD38+_LMI3_parentPerc__Index47	CD24+ CD38+_ParentalPercentage	-0.00917697	0.191696
rs12679857	A	CD24+CD38+_LMI3_parentPerc__Index47	CD24+ CD38+_ParentalPercentage	-0.00976642	0.193514
rs17166496	G	CD24+CD38+_LMI3_parentPerc__Index47	CD24+ CD38+_ParentalPercentage	-0.00994972	0.209866
rs11258747	T	CD24+CD38+_LMI3_parentPerc__Index47	CD24+ CD38+_ParentalPercentage	0.0097939	0.21446
rs1534422	G	CD24+CD38+_LMI3_parentPerc__Index47	CD24+ CD38+_ParentalPercentage	-0.00928087	0.221008
rs11203203	A	CD24+CD38+_LMI3_parentPerc__Index47	CD24+ CD38+_ParentalPercentage	-0.0085891	0.22733
rs4849135	G	CD24+CD38+_LMI3_parentPerc__Index47	CD24+ CD38+_ParentalPercentage	-0.00909621	0.242734
rs516246	T	CD24+CD38+_LMI3_parentPerc__Index47	CD24+ CD38+_ParentalPercentage	0.0078046	0.244337
rs10137082	C	CD24+CD38+_LMI3_parentPerc__Index47	CD24+ CD38+_ParentalPercentage	0.00882733	0.266702
rs478222	A	CD24+CD38+_LMI3_parentPerc__Index47	CD24+ CD38+_ParentalPercentage	0.00655937	0.313799
rs1465788	C	CD24+CD38+_LMI3_parentPerc__Index47	CD24+ CD38+_ParentalPercentage	-0.007885	0.325929
rs9585056	C	CD24+CD38+_LMI3_parentPerc__Index47	CD24+ CD38+_ParentalPercentage	-0.00804688	0.331901
rs229533	C	CD24+CD38+_LMI3_parentPerc__Index47	CD24+ CD38+_ParentalPercentage	-0.00686799	0.344407
rs2269241	C	CD24+CD38+_LMI3_parentPerc__Index47	CD24+ CD38+_ParentalPercentage	-0.00920158	0.375389
rs10517086	A	CD24+CD38+_LMI3_parentPerc__Index47	CD24+ CD38+_ParentalPercentage	0.00599802	0.410609
rs947474	A	CD24+CD38+_LMI3_parentPerc__Index47	CD24+ CD38+_ParentalPercentage	-0.00657337	0.42724
rs4763879	A	CD24+CD38+_LMI3_parentPerc__Index47	CD24+ CD38+_ParentalPercentage	0.00525124	0.443255
rs9272346	G	CD24+CD38+_LMI3_parentPerc__Index47	CD24+ CD38+_ParentalPercentage	-0.00711479	0.451078
rs1052553	A	CD24+CD38+_LMI3_parentPerc__Index47	CD24+ CD38+_ParentalPercentage	-0.0058361	0.492632
rs4505848	G	CD24+CD38+_LMI3_parentPerc__Index47	CD24+ CD38+_ParentalPercentage	-0.00453954	0.505439
rs1615504	T	CD24+CD38+_LMI3_parentPerc__Index47	CD24+ CD38+_ParentalPercentage	0.00487319	0.522301
rs12444268	A	CD24+CD38+_LMI3_parentPerc__Index47	CD24+ CD38+_ParentalPercentage	-0.00568584	0.536921
rs3087243	G	CD24+CD38+_LMI3_parentPerc__Index47	CD24+ CD38+_ParentalPercentage	-0.0044045	0.544096
rs539514	T	CD24+CD38+_LMI3_parentPerc__Index47	CD24+ CD38+_ParentalPercentage	-0.00422883	0.544968
rs72928038	A	CD24+CD38+_LMI3_parentPerc__Index47	CD24+ CD38+_ParentalPercentage	0.0056168	0.55857
rs7804356	T	CD24+CD38+_LMI3_parentPerc__Index47	CD24+ CD38+_ParentalPercentage	-0.00477016	0.561041
rs13415583	T	CD24+CD38+_LMI3_parentPerc__Index47	CD24+ CD38+_ParentalPercentage	-0.00438024	0.585351
rs2611215	A	CD24+CD38+_LMI3_parentPerc__Index47	CD24+ CD38+_ParentalPercentage	-0.0046062	0.594701
rs72727394	T	CD24+CD38+_LMI3_parentPerc__Index47	CD24+ CD38+_ParentalPercentage	-0.00436376	0.605933
rs11574435	C	CD24+CD38+_LMI3_parentPerc__Index47	CD24+ CD38+_ParentalPercentage	-0.00678838	0.612701
rs4900384	G	CD24+CD38+_LMI3_parentPerc__Index47	CD24+ CD38+_ParentalPercentage	-0.00381254	0.625274
rs5753037	T	CD24+CD38+_LMI3_parentPerc__Index47	CD24+ CD38+_ParentalPercentage	-0.00339162	0.639449
rs689	T	CD24+CD38+_LMI3_parentPerc__Index47	CD24+ CD38+_ParentalPercentage	0.00386353	0.69796
rs6691977	C	CD24+CD38+_LMI3_parentPerc__Index47	CD24+ CD38+_ParentalPercentage	-0.00295298	0.729228
rs2304256	C	CD24+CD38+_LMI3_parentPerc__Index47	CD24+ CD38+_ParentalPercentage	-0.00266191	0.738006
rs2165738	C	CD24+CD38+_LMI3_parentPerc__Index47	CD24+ CD38+_ParentalPercentage	0.0027408	0.745421
rs3024505	G	CD24+CD38+_LMI3_parentPerc__Index47	CD24+ CD38+_ParentalPercentage	0.00318641	0.751732
rs653178	C	CD24+CD38+_LMI3_parentPerc__Index47	CD24+ CD38+_ParentalPercentage	0.00203664	0.761183
rs193778	G	CD24+CD38+_LMI3_parentPerc__Index47	CD24+ CD38+_ParentalPercentage	-0.00229784	0.763316
rs16956936	C	CD24+CD38+_LMI3_parentPerc__Index47	CD24+ CD38+_ParentalPercentage	-0.00332367	0.765818
rs4788084	C	CD24+CD38+_LMI3_parentPerc__Index47	CD24+ CD38+_ParentalPercentage	0.00183544	0.7956
rs1990760	T	CD24+CD38+_LMI3_parentPerc__Index47	CD24+ CD38+_ParentalPercentage	-0.00187592	0.799715
rs10786436	T	CD24+CD38+_LMI3_parentPerc__Index47	CD24+ CD38+_ParentalPercentage	0.00190411	0.805948
rs7202877	G	CD24+CD38+_LMI3_parentPerc__Index47	CD24+ CD38+_ParentalPercentage	0.00256249	0.813802
rs550448	A	CD24+CD38+_LMI3_parentPerc__Index47	CD24+ CD38+_ParentalPercentage	-0.00240121	0.827391
rs7020673	G	CD24+CD38+_LMI3_parentPerc__Index47	CD24+ CD38+_ParentalPercentage	0.00125814	0.856337
rs6518350	A	CD24+CD38+_LMI3_parentPerc__Index47	CD24+ CD38+_ParentalPercentage	-0.00108446	0.913127
rs62447205	A	CD24+CD38+_LMI3_parentPerc__Index47	CD24+ CD38+_ParentalPercentage	-0.000800953	0.918374
rs2281808	C	CD24+CD38+_LMI3_parentPerc__Index47	CD24+ CD38+_ParentalPercentage	-0.000684304	0.927177
rs1893217	G	CD24+CD38+_LMI3_parentPerc__Index47	CD24+ CD38+_ParentalPercentage	0.000690361	0.936328
rs2290400	C	CD24+CD38+_LMI3_parentPerc__Index47	CD24+ CD38+_ParentalPercentage	0.000455375	0.951528
rs2476601	A	CD24+CD38+_LMI3_parentPerc__Index47	CD24+ CD38+_ParentalPercentage	-0.000175333	0.984354
rs10795791	G	CD24+CD38+_LMI3_parentPerc__Index47	CD24+ CD38+_ParentalPercentage	0.000127532	0.986059
rs10509540	T	CD24+CD38+_LMI3_parentPerc__Index47	CD24+ CD38+_ParentalPercentage	-9.94567e-05	0.989142
rs947474	A	CD24+CD38+CD27+IgM+_LMI3_grandparentPerc__Index47	IgM only B cells (CD24+ CD38+ CD27+ IgM+ )_GrandParentalPercentage	0.0106032	0.0548658
rs12927355	C	CD24+CD38+CD27+IgM+_LMI3_grandparentPerc__Index47	IgM only B cells (CD24+ CD38+ CD27+ IgM+ )_GrandParentalPercentage	-0.00879827	0.0765525
rs539514	T	CD24+CD38+CD27+IgM+_LMI3_grandparentPerc__Index47	IgM only B cells (CD24+ CD38+ CD27+ IgM+ )_GrandParentalPercentage	0.00809776	0.082406
rs4763879	A	CD24+CD38+CD27+IgM+_LMI3_grandparentPerc__Index47	IgM only B cells (CD24+ CD38+ CD27+ IgM+ )_GrandParentalPercentage	-0.00782405	0.0870582
rs3024505	G	CD24+CD38+CD27+IgM+_LMI3_grandparentPerc__Index47	IgM only B cells (CD24+ CD38+ CD27+ IgM+ )_GrandParentalPercentage	0.0109423	0.103586
rs550448	A	CD24+CD38+CD27+IgM+_LMI3_grandparentPerc__Index47	IgM only B cells (CD24+ CD38+ CD27+ IgM+ )_GrandParentalPercentage	-0.0111822	0.12829
rs9388489	G	CD24+CD38+CD27+IgM+_LMI3_grandparentPerc__Index47	IgM only B cells (CD24+ CD38+ CD27+ IgM+ )_GrandParentalPercentage	0.00617761	0.170013
rs62447205	A	CD24+CD38+CD27+IgM+_LMI3_grandparentPerc__Index47	IgM only B cells (CD24+ CD38+ CD27+ IgM+ )_GrandParentalPercentage	0.00678006	0.194149
rs3825932	T	CD24+CD38+CD27+IgM+_LMI3_grandparentPerc__Index47	IgM only B cells (CD24+ CD38+ CD27+ IgM+ )_GrandParentalPercentage	0.00636176	0.195506
rs6518350	A	CD24+CD38+CD27+IgM+_LMI3_grandparentPerc__Index47	IgM only B cells (CD24+ CD38+ CD27+ IgM+ )_GrandParentalPercentage	0.00823108	0.215313
rs2304256	C	CD24+CD38+CD27+IgM+_LMI3_grandparentPerc__Index47	IgM only B cells (CD24+ CD38+ CD27+ IgM+ )_GrandParentalPercentage	0.00617771	0.245538
rs1052553	A	CD24+CD38+CD27+IgM+_LMI3_grandparentPerc__Index47	IgM only B cells (CD24+ CD38+ CD27+ IgM+ )_GrandParentalPercentage	0.00660168	0.245839
rs6691977	C	CD24+CD38+CD27+IgM+_LMI3_grandparentPerc__Index47	IgM only B cells (CD24+ CD38+ CD27+ IgM+ )_GrandParentalPercentage	0.0063526	0.265371
rs478222	A	CD24+CD38+CD27+IgM+_LMI3_grandparentPerc__Index47	IgM only B cells (CD24+ CD38+ CD27+ IgM+ )_GrandParentalPercentage	0.00469708	0.281224
rs2269241	C	CD24+CD38+CD27+IgM+_LMI3_grandparentPerc__Index47	IgM only B cells (CD24+ CD38+ CD27+ IgM+ )_GrandParentalPercentage	0.00737504	0.2884
rs1534422	G	CD24+CD38+CD27+IgM+_LMI3_grandparentPerc__Index47	IgM only B cells (CD24+ CD38+ CD27+ IgM+ )_GrandParentalPercentage	0.00532132	0.294816
rs2281808	C	CD24+CD38+CD27+IgM+_LMI3_grandparentPerc__Index47	IgM only B cells (CD24+ CD38+ CD27+ IgM+ )_GrandParentalPercentage	0.00507318	0.310898
rs72727394	T	CD24+CD38+CD27+IgM+_LMI3_grandparentPerc__Index47	IgM only B cells (CD24+ CD38+ CD27+ IgM+ )_GrandParentalPercentage	0.00566617	0.316615
rs7804356	T	CD24+CD38+CD27+IgM+_LMI3_grandparentPerc__Index47	IgM only B cells (CD24+ CD38+ CD27+ IgM+ )_GrandParentalPercentage	0.0052639	0.337656
rs229533	C	CD24+CD38+CD27+IgM+_LMI3_grandparentPerc__Index47	IgM only B cells (CD24+ CD38+ CD27+ IgM+ )_GrandParentalPercentage	0.00441384	0.364126
rs924043	C	CD24+CD38+CD27+IgM+_LMI3_grandparentPerc__Index47	IgM only B cells (CD24+ CD38+ CD27+ IgM+ )_GrandParentalPercentage	0.00600328	0.383638
rs11954020	G	CD24+CD38+CD27+IgM+_LMI3_grandparentPerc__Index47	IgM only B cells (CD24+ CD38+ CD27+ IgM+ )_GrandParentalPercentage	0.00405166	0.386067
rs10137082	C	CD24+CD38+CD27+IgM+_LMI3_grandparentPerc__Index47	IgM only B cells (CD24+ CD38+ CD27+ IgM+ )_GrandParentalPercentage	-0.00445045	0.403227
rs11258747	T	CD24+CD38+CD27+IgM+_LMI3_grandparentPerc__Index47	IgM only B cells (CD24+ CD38+ CD27+ IgM+ )_GrandParentalPercentage	-0.00439325	0.406033
rs689	T	CD24+CD38+CD27+IgM+_LMI3_grandparentPerc__Index47	IgM only B cells (CD24+ CD38+ CD27+ IgM+ )_GrandParentalPercentage	-0.00549666	0.409255
rs10517086	A	CD24+CD38+CD27+IgM+_LMI3_grandparentPerc__Index47	IgM only B cells (CD24+ CD38+ CD27+ IgM+ )_GrandParentalPercentage	0.00401899	0.410218
rs4849135	G	CD24+CD38+CD27+IgM+_LMI3_grandparentPerc__Index47	IgM only B cells (CD24+ CD38+ CD27+ IgM+ )_GrandParentalPercentage	-0.00398779	0.44473
rs12679857	A	CD24+CD38+CD27+IgM+_LMI3_grandparentPerc__Index47	IgM only B cells (CD24+ CD38+ CD27+ IgM+ )_GrandParentalPercentage	0.00376212	0.454999
rs9272346	G	CD24+CD38+CD27+IgM+_LMI3_grandparentPerc__Index47	IgM only B cells (CD24+ CD38+ CD27+ IgM+ )_GrandParentalPercentage	-0.00464621	0.462298
rs10795791	G	CD24+CD38+CD27+IgM+_LMI3_grandparentPerc__Index47	IgM only B cells (CD24+ CD38+ CD27+ IgM+ )_GrandParentalPercentage	0.00352353	0.470575
rs4505848	G	CD24+CD38+CD27+IgM+_LMI3_grandparentPerc__Index47	IgM only B cells (CD24+ CD38+ CD27+ IgM+ )_GrandParentalPercentage	-0.00326376	0.474472
rs2611215	A	CD24+CD38+CD27+IgM+_LMI3_grandparentPerc__Index47	IgM only B cells (CD24+ CD38+ CD27+ IgM+ )_GrandParentalPercentage	0.00411158	0.477991
rs16956936	C	CD24+CD38+CD27+IgM+_LMI3_grandparentPerc__Index47	IgM only B cells (CD24+ CD38+ CD27+ IgM+ )_GrandParentalPercentage	-0.00508357	0.496019
rs12444268	A	CD24+CD38+CD27+IgM+_LMI3_grandparentPerc__Index47	IgM only B cells (CD24+ CD38+ CD27+ IgM+ )_GrandParentalPercentage	-0.00389312	0.527702
rs1465788	C	CD24+CD38+CD27+IgM+_LMI3_grandparentPerc__Index47	IgM only B cells (CD24+ CD38+ CD27+ IgM+ )_GrandParentalPercentage	0.0033656	0.531407
rs1990760	T	CD24+CD38+CD27+IgM+_LMI3_grandparentPerc__Index47	IgM only B cells (CD24+ CD38+ CD27+ IgM+ )_GrandParentalPercentage	-0.00288419	0.559996
rs1893217	G	CD24+CD38+CD27+IgM+_LMI3_grandparentPerc__Index47	IgM only B cells (CD24+ CD38+ CD27+ IgM+ )_GrandParentalPercentage	0.00333789	0.563839
rs4900384	G	CD24+CD38+CD27+IgM+_LMI3_grandparentPerc__Index47	IgM only B cells (CD24+ CD38+ CD27+ IgM+ )_GrandParentalPercentage	-0.00285944	0.584265
rs17166496	G	CD24+CD38+CD27+IgM+_LMI3_grandparentPerc__Index47	IgM only B cells (CD24+ CD38+ CD27+ IgM+ )_GrandParentalPercentage	-0.00278452	0.600737
rs7020673	G	CD24+CD38+CD27+IgM+_LMI3_grandparentPerc__Index47	IgM only B cells (CD24+ CD38+ CD27+ IgM+ )_GrandParentalPercentage	-0.00236791	0.610701
rs11203203	A	CD24+CD38+CD27+IgM+_LMI3_grandparentPerc__Index47	IgM only B cells (CD24+ CD38+ CD27+ IgM+ )_GrandParentalPercentage	0.00230911	0.628336
rs425105	T	CD24+CD38+CD27+IgM+_LMI3_grandparentPerc__Index47	IgM only B cells (CD24+ CD38+ CD27+ IgM+ )_GrandParentalPercentage	-0.00310227	0.640873
rs2476601	A	CD24+CD38+CD27+IgM+_LMI3_grandparentPerc__Index47	IgM only B cells (CD24+ CD38+ CD27+ IgM+ )_GrandParentalPercentage	0.00270309	0.651486
rs9585056	C	CD24+CD38+CD27+IgM+_LMI3_grandparentPerc__Index47	IgM only B cells (CD24+ CD38+ CD27+ IgM+ )_GrandParentalPercentage	-0.00248752	0.654431
rs3087243	G	CD24+CD38+CD27+IgM+_LMI3_grandparentPerc__Index47	IgM only B cells (CD24+ CD38+ CD27+ IgM+ )_GrandParentalPercentage	0.00215066	0.658238
rs7202877	G	CD24+CD38+CD27+IgM+_LMI3_grandparentPerc__Index47	IgM only B cells (CD24+ CD38+ CD27+ IgM+ )_GrandParentalPercentage	0.00303783	0.676597
rs193778	G	CD24+CD38+CD27+IgM+_LMI3_grandparentPerc__Index47	IgM only B cells (CD24+ CD38+ CD27+ IgM+ )_GrandParentalPercentage	0.00190425	0.709323
rs653178	C	CD24+CD38+CD27+IgM+_LMI3_grandparentPerc__Index47	IgM only B cells (CD24+ CD38+ CD27+ IgM+ )_GrandParentalPercentage	-0.00160831	0.719963
rs11574435	C	CD24+CD38+CD27+IgM+_LMI3_grandparentPerc__Index47	IgM only B cells (CD24+ CD38+ CD27+ IgM+ )_GrandParentalPercentage	0.0030357	0.735307
rs1983853	C	CD24+CD38+CD27+IgM+_LMI3_grandparentPerc__Index47	IgM only B cells (CD24+ CD38+ CD27+ IgM+ )_GrandParentalPercentage	-0.00301313	0.73761
rs2292239	T	CD24+CD38+CD27+IgM+_LMI3_grandparentPerc__Index47	IgM only B cells (CD24+ CD38+ CD27+ IgM+ )_GrandParentalPercentage	-0.00124348	0.792
rs56994090	T	CD24+CD38+CD27+IgM+_LMI3_grandparentPerc__Index47	IgM only B cells (CD24+ CD38+ CD27+ IgM+ )_GrandParentalPercentage	0.00130677	0.819118
rs13415583	T	CD24+CD38+CD27+IgM+_LMI3_grandparentPerc__Index47	IgM only B cells (CD24+ CD38+ CD27+ IgM+ )_GrandParentalPercentage	0.00122346	0.819995
rs1615504	T	CD24+CD38+CD27+IgM+_LMI3_grandparentPerc__Index47	IgM only B cells (CD24+ CD38+ CD27+ IgM+ )_GrandParentalPercentage	-0.00112877	0.82489
rs2290400	C	CD24+CD38+CD27+IgM+_LMI3_grandparentPerc__Index47	IgM only B cells (CD24+ CD38+ CD27+ IgM+ )_GrandParentalPercentage	-0.00110625	0.825416
rs2165738	C	CD24+CD38+CD27+IgM+_LMI3_grandparentPerc__Index47	IgM only B cells (CD24+ CD38+ CD27+ IgM+ )_GrandParentalPercentage	0.000850431	0.880399
rs5753037	T	CD24+CD38+CD27+IgM+_LMI3_grandparentPerc__Index47	IgM only B cells (CD24+ CD38+ CD27+ IgM+ )_GrandParentalPercentage	-0.000512793	0.915766
rs6547853	G	CD24+CD38+CD27+IgM+_LMI3_grandparentPerc__Index47	IgM only B cells (CD24+ CD38+ CD27+ IgM+ )_GrandParentalPercentage	-0.000479218	0.916234
rs4788084	C	CD24+CD38+CD27+IgM+_LMI3_grandparentPerc__Index47	IgM only B cells (CD24+ CD38+ CD27+ IgM+ )_GrandParentalPercentage	-0.000380381	0.936093
rs10786436	T	CD24+CD38+CD27+IgM+_LMI3_grandparentPerc__Index47	IgM only B cells (CD24+ CD38+ CD27+ IgM+ )_GrandParentalPercentage	-0.000270434	0.958441
rs72928038	A	CD24+CD38+CD27+IgM+_LMI3_grandparentPerc__Index47	IgM only B cells (CD24+ CD38+ CD27+ IgM+ )_GrandParentalPercentage	-0.000283817	0.964799
rs10509540	T	CD24+CD38+CD27+IgM+_LMI3_grandparentPerc__Index47	IgM only B cells (CD24+ CD38+ CD27+ IgM+ )_GrandParentalPercentage	6.87424e-05	0.98879
rs516246	T	CD24+CD38+CD27+IgM+_LMI3_grandparentPerc__Index47	IgM only B cells (CD24+ CD38+ CD27+ IgM+ )_GrandParentalPercentage	-5.62023e-05	0.990025
rs947474	A	CD24+CD38+CD27+IgM+_LMI3_parentPerc__Index55	IgM only B cells (CD24+ CD38+ CD27+ IgM+ )_ParentalPercentage	0.0146581	0.0417011
rs12927355	C	CD24+CD38+CD27+IgM+_LMI3_parentPerc__Index55	IgM only B cells (CD24+ CD38+ CD27+ IgM+ )_ParentalPercentage	-0.0131265	0.0424923
rs539514	T	CD24+CD38+CD27+IgM+_LMI3_parentPerc__Index55	IgM only B cells (CD24+ CD38+ CD27+ IgM+ )_ParentalPercentage	0.0114685	0.0590768
rs4763879	A	CD24+CD38+CD27+IgM+_LMI3_parentPerc__Index55	IgM only B cells (CD24+ CD38+ CD27+ IgM+ )_ParentalPercentage	-0.0106765	0.0732651
rs9388489	G	CD24+CD38+CD27+IgM+_LMI3_parentPerc__Index55	IgM only B cells (CD24+ CD38+ CD27+ IgM+ )_ParentalPercentage	0.00975662	0.0961827
rs550448	A	CD24+CD38+CD27+IgM+_LMI3_parentPerc__Index55	IgM only B cells (CD24+ CD38+ CD27+ IgM+ )_ParentalPercentage	-0.0138083	0.149931
rs3825932	T	CD24+CD38+CD27+IgM+_LMI3_parentPerc__Index55	IgM only B cells (CD24+ CD38+ CD27+ IgM+ )_ParentalPercentage	0.00911206	0.154909
rs3024505	G	CD24+CD38+CD27+IgM+_LMI3_parentPerc__Index55	IgM only B cells (CD24+ CD38+ CD27+ IgM+ )_ParentalPercentage	0.0122782	0.161682
rs62447205	A	CD24+CD38+CD27+IgM+_LMI3_parentPerc__Index55	IgM only B cells (CD24+ CD38+ CD27+ IgM+ )_ParentalPercentage	0.00904798	0.183891
rs1052553	A	CD24+CD38+CD27+IgM+_LMI3_parentPerc__Index55	IgM only B cells (CD24+ CD38+ CD27+ IgM+ )_ParentalPercentage	0.00975795	0.188159
rs6518350	A	CD24+CD38+CD27+IgM+_LMI3_parentPerc__Index55	IgM only B cells (CD24+ CD38+ CD27+ IgM+ )_ParentalPercentage	0.010406	0.229699
rs2269241	C	CD24+CD38+CD27+IgM+_LMI3_parentPerc__Index55	IgM only B cells (CD24+ CD38+ CD27+ IgM+ )_ParentalPercentage	0.0108259	0.231892
rs1534422	G	CD24+CD38+CD27+IgM+_LMI3_parentPerc__Index55	IgM only B cells (CD24+ CD38+ CD27+ IgM+ )_ParentalPercentage	0.00779123	0.23933
rs2304256	C	CD24+CD38+CD27+IgM+_LMI3_parentPerc__Index55	IgM only B cells (CD24+ CD38+ CD27+ IgM+ )_ParentalPercentage	0.00808704	0.243713
rs6691977	C	CD24+CD38+CD27+IgM+_LMI3_parentPerc__Index55	IgM only B cells (CD24+ CD38+ CD27+ IgM+ )_ParentalPercentage	0.00860408	0.247288
rs10137082	C	CD24+CD38+CD27+IgM+_LMI3_parentPerc__Index55	IgM only B cells (CD24+ CD38+ CD27+ IgM+ )_ParentalPercentage	-0.0079096	0.254271
rs924043	C	CD24+CD38+CD27+IgM+_LMI3_parentPerc__Index55	IgM only B cells (CD24+ CD38+ CD27+ IgM+ )_ParentalPercentage	0.00967366	0.281442
rs2281808	C	CD24+CD38+CD27+IgM+_LMI3_parentPerc__Index55	IgM only B cells (CD24+ CD38+ CD27+ IgM+ )_ParentalPercentage	0.00679799	0.297712
rs7804356	T	CD24+CD38+CD27+IgM+_LMI3_parentPerc__Index55	IgM only B cells (CD24+ CD38+ CD27+ IgM+ )_ParentalPercentage	0.00721226	0.31368
rs11258747	T	CD24+CD38+CD27+IgM+_LMI3_parentPerc__Index55	IgM only B cells (CD24+ CD38+ CD27+ IgM+ )_ParentalPercentage	-0.00683211	0.321565
rs689	T	CD24+CD38+CD27+IgM+_LMI3_parentPerc__Index55	IgM only B cells (CD24+ CD38+ CD27+ IgM+ )_ParentalPercentage	-0.00854897	0.32484
rs72727394	T	CD24+CD38+CD27+IgM+_LMI3_parentPerc__Index55	IgM only B cells (CD24+ CD38+ CD27+ IgM+ )_ParentalPercentage	0.00722674	0.327374
rs229533	C	CD24+CD38+CD27+IgM+_LMI3_parentPerc__Index55	IgM only B cells (CD24+ CD38+ CD27+ IgM+ )_ParentalPercentage	0.00589018	0.353009
rs12679857	A	CD24+CD38+CD27+IgM+_LMI3_parentPerc__Index55	IgM only B cells (CD24+ CD38+ CD27+ IgM+ )_ParentalPercentage	0.00595756	0.364115
rs478222	A	CD24+CD38+CD27+IgM+_LMI3_parentPerc__Index55	IgM only B cells (CD24+ CD38+ CD27+ IgM+ )_ParentalPercentage	0.00474679	0.403932
rs11954020	G	CD24+CD38+CD27+IgM+_LMI3_parentPerc__Index55	IgM only B cells (CD24+ CD38+ CD27+ IgM+ )_ParentalPercentage	0.00457602	0.452928
rs16956936	C	CD24+CD38+CD27+IgM+_LMI3_parentPerc__Index55	IgM only B cells (CD24+ CD38+ CD27+ IgM+ )_ParentalPercentage	-0.00668381	0.492467
rs1465788	C	CD24+CD38+CD27+IgM+_LMI3_parentPerc__Index55	IgM only B cells (CD24+ CD38+ CD27+ IgM+ )_ParentalPercentage	0.00471951	0.500906
rs12444268	A	CD24+CD38+CD27+IgM+_LMI3_parentPerc__Index55	IgM only B cells (CD24+ CD38+ CD27+ IgM+ )_ParentalPercentage	-0.00536333	0.504641
rs11203203	A	CD24+CD38+CD27+IgM+_LMI3_parentPerc__Index55	IgM only B cells (CD24+ CD38+ CD27+ IgM+ )_ParentalPercentage	0.00401867	0.51816
rs10795791	G	CD24+CD38+CD27+IgM+_LMI3_parentPerc__Index55	IgM only B cells (CD24+ CD38+ CD27+ IgM+ )_ParentalPercentage	0.00407374	0.522409
rs2611215	A	CD24+CD38+CD27+IgM+_LMI3_parentPerc__Index55	IgM only B cells (CD24+ CD38+ CD27+ IgM+ )_ParentalPercentage	0.00475154	0.529532
rs9272346	G	CD24+CD38+CD27+IgM+_LMI3_parentPerc__Index55	IgM only B cells (CD24+ CD38+ CD27+ IgM+ )_ParentalPercentage	-0.0051647	0.530998
rs10517086	A	CD24+CD38+CD27+IgM+_LMI3_parentPerc__Index55	IgM only B cells (CD24+ CD38+ CD27+ IgM+ )_ParentalPercentage	0.00389148	0.541033
rs1893217	G	CD24+CD38+CD27+IgM+_LMI3_parentPerc__Index55	IgM only B cells (CD24+ CD38+ CD27+ IgM+ )_ParentalPercentage	0.00447937	0.55254
rs3087243	G	CD24+CD38+CD27+IgM+_LMI3_parentPerc__Index55	IgM only B cells (CD24+ CD38+ CD27+ IgM+ )_ParentalPercentage	0.00361731	0.568248
rs4505848	G	CD24+CD38+CD27+IgM+_LMI3_parentPerc__Index55	IgM only B cells (CD24+ CD38+ CD27+ IgM+ )_ParentalPercentage	-0.00338805	0.569201
rs2476601	A	CD24+CD38+CD27+IgM+_LMI3_parentPerc__Index55	IgM only B cells (CD24+ CD38+ CD27+ IgM+ )_ParentalPercentage	0.00440436	0.572432
rs4849135	G	CD24+CD38+CD27+IgM+_LMI3_parentPerc__Index55	IgM only B cells (CD24+ CD38+ CD27+ IgM+ )_ParentalPercentage	-0.00381204	0.575451
rs1990760	T	CD24+CD38+CD27+IgM+_LMI3_parentPerc__Index55	IgM only B cells (CD24+ CD38+ CD27+ IgM+ )_ParentalPercentage	-0.00351983	0.585454
rs653178	C	CD24+CD38+CD27+IgM+_LMI3_parentPerc__Index55	IgM only B cells (CD24+ CD38+ CD27+ IgM+ )_ParentalPercentage	-0.00306333	0.600463
rs7202877	G	CD24+CD38+CD27+IgM+_LMI3_parentPerc__Index55	IgM only B cells (CD24+ CD38+ CD27+ IgM+ )_ParentalPercentage	0.00432171	0.649062
rs11574435	C	CD24+CD38+CD27+IgM+_LMI3_parentPerc__Index55	IgM only B cells (CD24+ CD38+ CD27+ IgM+ )_ParentalPercentage	0.00523349	0.654879
rs17166496	G	CD24+CD38+CD27+IgM+_LMI3_parentPerc__Index55	IgM only B cells (CD24+ CD38+ CD27+ IgM+ )_ParentalPercentage	-0.00287953	0.678164
rs1983853	C	CD24+CD38+CD27+IgM+_LMI3_parentPerc__Index55	IgM only B cells (CD24+ CD38+ CD27+ IgM+ )_ParentalPercentage	-0.00470826	0.688074
rs1615504	T	CD24+CD38+CD27+IgM+_LMI3_parentPerc__Index55	IgM only B cells (CD24+ CD38+ CD27+ IgM+ )_ParentalPercentage	-0.00259336	0.696629
rs7020673	G	CD24+CD38+CD27+IgM+_LMI3_parentPerc__Index55	IgM only B cells (CD24+ CD38+ CD27+ IgM+ )_ParentalPercentage	-0.00235683	0.69764
rs4900384	G	CD24+CD38+CD27+IgM+_LMI3_parentPerc__Index55	IgM only B cells (CD24+ CD38+ CD27+ IgM+ )_ParentalPercentage	-0.0023694	0.728132
rs2290400	C	CD24+CD38+CD27+IgM+_LMI3_parentPerc__Index55	IgM only B cells (CD24+ CD38+ CD27+ IgM+ )_ParentalPercentage	-0.00208025	0.750401
rs9585056	C	CD24+CD38+CD27+IgM+_LMI3_parentPerc__Index55	IgM only B cells (CD24+ CD38+ CD27+ IgM+ )_ParentalPercentage	-0.00188222	0.795104
rs193778	G	CD24+CD38+CD27+IgM+_LMI3_parentPerc__Index55	IgM only B cells (CD24+ CD38+ CD27+ IgM+ )_ParentalPercentage	0.00155275	0.815709
rs425105	T	CD24+CD38+CD27+IgM+_LMI3_parentPerc__Index55	IgM only B cells (CD24+ CD38+ CD27+ IgM+ )_ParentalPercentage	-0.0018945	0.82711
rs6547853	G	CD24+CD38+CD27+IgM+_LMI3_parentPerc__Index55	IgM only B cells (CD24+ CD38+ CD27+ IgM+ )_ParentalPercentage	-0.0010184	0.863902
rs10509540	T	CD24+CD38+CD27+IgM+_LMI3_parentPerc__Index55	IgM only B cells (CD24+ CD38+ CD27+ IgM+ )_ParentalPercentage	-0.000902422	0.887518
rs10786436	T	CD24+CD38+CD27+IgM+_LMI3_parentPerc__Index55	IgM only B cells (CD24+ CD38+ CD27+ IgM+ )_ParentalPercentage	-0.000840062	0.901209
rs2165738	C	CD24+CD38+CD27+IgM+_LMI3_parentPerc__Index55	IgM only B cells (CD24+ CD38+ CD27+ IgM+ )_ParentalPercentage	0.000857103	0.907425
rs13415583	T	CD24+CD38+CD27+IgM+_LMI3_parentPerc__Index55	IgM only B cells (CD24+ CD38+ CD27+ IgM+ )_ParentalPercentage	0.000701838	0.920268
rs516246	T	CD24+CD38+CD27+IgM+_LMI3_parentPerc__Index55	IgM only B cells (CD24+ CD38+ CD27+ IgM+ )_ParentalPercentage	-0.000547334	0.925612
rs56994090	T	CD24+CD38+CD27+IgM+_LMI3_parentPerc__Index55	IgM only B cells (CD24+ CD38+ CD27+ IgM+ )_ParentalPercentage	0.000526138	0.943714
rs5753037	T	CD24+CD38+CD27+IgM+_LMI3_parentPerc__Index55	IgM only B cells (CD24+ CD38+ CD27+ IgM+ )_ParentalPercentage	-0.000445157	0.943867
rs2292239	T	CD24+CD38+CD27+IgM+_LMI3_parentPerc__Index55	IgM only B cells (CD24+ CD38+ CD27+ IgM+ )_ParentalPercentage	-0.000157455	0.979572
rs4788084	C	CD24+CD38+CD27+IgM+_LMI3_parentPerc__Index55	IgM only B cells (CD24+ CD38+ CD27+ IgM+ )_ParentalPercentage	0.000121133	0.984378
rs72928038	A	CD24+CD38+CD27+IgM+_LMI3_parentPerc__Index55	IgM only B cells (CD24+ CD38+ CD27+ IgM+ )_ParentalPercentage	4.22075e-05	0.995984
rs72928038	A	CD3+CD56-_LMI1_grandparentPerc__Index1	T cells (CD3+ CD56-)_GrandParentalPercentage	-0.0345212	0.00262876
rs2611215	A	CD3+CD56-_LMI1_grandparentPerc__Index1	T cells (CD3+ CD56-)_GrandParentalPercentage	-0.024655	0.01764
rs10517086	A	CD3+CD56-_LMI1_grandparentPerc__Index1	T cells (CD3+ CD56-)_GrandParentalPercentage	-0.0169511	0.0533056
rs2281808	C	CD3+CD56-_LMI1_grandparentPerc__Index1	T cells (CD3+ CD56-)_GrandParentalPercentage	0.0173188	0.0543866
rs7804356	T	CD3+CD56-_LMI1_grandparentPerc__Index1	T cells (CD3+ CD56-)_GrandParentalPercentage	-0.0169956	0.0853936
rs1534422	G	CD3+CD56-_LMI1_grandparentPerc__Index1	T cells (CD3+ CD56-)_GrandParentalPercentage	-0.0148032	0.105575
rs2165738	C	CD3+CD56-_LMI1_grandparentPerc__Index1	T cells (CD3+ CD56-)_GrandParentalPercentage	0.0162908	0.109026
rs3087243	G	CD3+CD56-_LMI1_grandparentPerc__Index1	T cells (CD3+ CD56-)_GrandParentalPercentage	-0.0138811	0.112506
rs9585056	C	CD3+CD56-_LMI1_grandparentPerc__Index1	T cells (CD3+ CD56-)_GrandParentalPercentage	-0.0151412	0.130007
rs689	T	CD3+CD56-_LMI1_grandparentPerc__Index1	T cells (CD3+ CD56-)_GrandParentalPercentage	-0.0180927	0.131419
rs13415583	T	CD3+CD56-_LMI1_grandparentPerc__Index1	T cells (CD3+ CD56-)_GrandParentalPercentage	0.0141876	0.14254
rs1983853	C	CD3+CD56-_LMI1_grandparentPerc__Index1	T cells (CD3+ CD56-)_GrandParentalPercentage	-0.0210742	0.193146
rs11203203	A	CD3+CD56-_LMI1_grandparentPerc__Index1	T cells (CD3+ CD56-)_GrandParentalPercentage	-0.0102573	0.232618
rs72727394	T	CD3+CD56-_LMI1_grandparentPerc__Index1	T cells (CD3+ CD56-)_GrandParentalPercentage	0.0121635	0.233165
rs6518350	A	CD3+CD56-_LMI1_grandparentPerc__Index1	T cells (CD3+ CD56-)_GrandParentalPercentage	-0.0135534	0.258222
rs10786436	T	CD3+CD56-_LMI1_grandparentPerc__Index1	T cells (CD3+ CD56-)_GrandParentalPercentage	0.0100458	0.282605
rs1615504	T	CD3+CD56-_LMI1_grandparentPerc__Index1	T cells (CD3+ CD56-)_GrandParentalPercentage	0.00976751	0.287931
rs3024505	G	CD3+CD56-_LMI1_grandparentPerc__Index1	T cells (CD3+ CD56-)_GrandParentalPercentage	-0.0128831	0.288998
rs1990760	T	CD3+CD56-_LMI1_grandparentPerc__Index1	T cells (CD3+ CD56-)_GrandParentalPercentage	0.00910453	0.307385
rs11258747	T	CD3+CD56-_LMI1_grandparentPerc__Index1	T cells (CD3+ CD56-)_GrandParentalPercentage	-0.00901373	0.344558
rs193778	G	CD3+CD56-_LMI1_grandparentPerc__Index1	T cells (CD3+ CD56-)_GrandParentalPercentage	0.00840635	0.361283
rs4788084	C	CD3+CD56-_LMI1_grandparentPerc__Index1	T cells (CD3+ CD56-)_GrandParentalPercentage	0.00772062	0.366528
rs56994090	T	CD3+CD56-_LMI1_grandparentPerc__Index1	T cells (CD3+ CD56-)_GrandParentalPercentage	0.00894875	0.384965
rs3825932	T	CD3+CD56-_LMI1_grandparentPerc__Index1	T cells (CD3+ CD56-)_GrandParentalPercentage	-0.00721173	0.416564
rs11954020	G	CD3+CD56-_LMI1_grandparentPerc__Index1	T cells (CD3+ CD56-)_GrandParentalPercentage	-0.00674496	0.423867
rs1465788	C	CD3+CD56-_LMI1_grandparentPerc__Index1	T cells (CD3+ CD56-)_GrandParentalPercentage	0.00772422	0.425782
rs550448	A	CD3+CD56-_LMI1_grandparentPerc__Index1	T cells (CD3+ CD56-)_GrandParentalPercentage	-0.0104101	0.4335
rs2304256	C	CD3+CD56-_LMI1_grandparentPerc__Index1	T cells (CD3+ CD56-)_GrandParentalPercentage	0.00716535	0.455738
rs4505848	G	CD3+CD56-_LMI1_grandparentPerc__Index1	T cells (CD3+ CD56-)_GrandParentalPercentage	0.00612836	0.4566
rs10137082	C	CD3+CD56-_LMI1_grandparentPerc__Index1	T cells (CD3+ CD56-)_GrandParentalPercentage	-0.00702452	0.464677
rs7202877	G	CD3+CD56-_LMI1_grandparentPerc__Index1	T cells (CD3+ CD56-)_GrandParentalPercentage	-0.00933768	0.477101
rs17166496	G	CD3+CD56-_LMI1_grandparentPerc__Index1	T cells (CD3+ CD56-)_GrandParentalPercentage	-0.00647011	0.500181
rs6691977	C	CD3+CD56-_LMI1_grandparentPerc__Index1	T cells (CD3+ CD56-)_GrandParentalPercentage	-0.0065516	0.524727
rs1052553	A	CD3+CD56-_LMI1_grandparentPerc__Index1	T cells (CD3+ CD56-)_GrandParentalPercentage	-0.00652438	0.525412
rs16956936	C	CD3+CD56-_LMI1_grandparentPerc__Index1	T cells (CD3+ CD56-)_GrandParentalPercentage	0.00757156	0.574158
rs425105	T	CD3+CD56-_LMI1_grandparentPerc__Index1	T cells (CD3+ CD56-)_GrandParentalPercentage	0.00639165	0.594183
rs12927355	C	CD3+CD56-_LMI1_grandparentPerc__Index1	T cells (CD3+ CD56-)_GrandParentalPercentage	-0.00406522	0.651277
rs11574435	C	CD3+CD56-_LMI1_grandparentPerc__Index1	T cells (CD3+ CD56-)_GrandParentalPercentage	0.00727965	0.653122
rs947474	A	CD3+CD56-_LMI1_grandparentPerc__Index1	T cells (CD3+ CD56-)_GrandParentalPercentage	0.00370884	0.710892
rs12679857	A	CD3+CD56-_LMI1_grandparentPerc__Index1	T cells (CD3+ CD56-)_GrandParentalPercentage	0.00323246	0.722112
rs10795791	G	CD3+CD56-_LMI1_grandparentPerc__Index1	T cells (CD3+ CD56-)_GrandParentalPercentage	-0.00307345	0.727314
rs6547853	G	CD3+CD56-_LMI1_grandparentPerc__Index1	T cells (CD3+ CD56-)_GrandParentalPercentage	-0.00283186	0.730421
rs10509540	T	CD3+CD56-_LMI1_grandparentPerc__Index1	T cells (CD3+ CD56-)_GrandParentalPercentage	0.00300712	0.733301
rs478222	A	CD3+CD56-_LMI1_grandparentPerc__Index1	T cells (CD3+ CD56-)_GrandParentalPercentage	-0.00265573	0.735898
rs653178	C	CD3+CD56-_LMI1_grandparentPerc__Index1	T cells (CD3+ CD56-)_GrandParentalPercentage	0.00259105	0.748862
rs2290400	C	CD3+CD56-_LMI1_grandparentPerc__Index1	T cells (CD3+ CD56-)_GrandParentalPercentage	-0.00281958	0.755298
rs516246	T	CD3+CD56-_LMI1_grandparentPerc__Index1	T cells (CD3+ CD56-)_GrandParentalPercentage	0.00250523	0.757368
rs9388489	G	CD3+CD56-_LMI1_grandparentPerc__Index1	T cells (CD3+ CD56-)_GrandParentalPercentage	0.0024917	0.759513
rs2292239	T	CD3+CD56-_LMI1_grandparentPerc__Index1	T cells (CD3+ CD56-)_GrandParentalPercentage	-0.00219857	0.796055
rs4849135	G	CD3+CD56-_LMI1_grandparentPerc__Index1	T cells (CD3+ CD56-)_GrandParentalPercentage	-0.00241789	0.797419
rs9272346	G	CD3+CD56-_LMI1_grandparentPerc__Index1	T cells (CD3+ CD56-)_GrandParentalPercentage	-0.00271351	0.812017
rs5753037	T	CD3+CD56-_LMI1_grandparentPerc__Index1	T cells (CD3+ CD56-)_GrandParentalPercentage	-0.00207477	0.812482
rs1893217	G	CD3+CD56-_LMI1_grandparentPerc__Index1	T cells (CD3+ CD56-)_GrandParentalPercentage	0.00240819	0.817522
rs62447205	A	CD3+CD56-_LMI1_grandparentPerc__Index1	T cells (CD3+ CD56-)_GrandParentalPercentage	-0.00185049	0.844578
rs2269241	C	CD3+CD56-_LMI1_grandparentPerc__Index1	T cells (CD3+ CD56-)_GrandParentalPercentage	0.00220613	0.860451
rs924043	C	CD3+CD56-_LMI1_grandparentPerc__Index1	T cells (CD3+ CD56-)_GrandParentalPercentage	-0.00211182	0.865222
rs2476601	A	CD3+CD56-_LMI1_grandparentPerc__Index1	T cells (CD3+ CD56-)_GrandParentalPercentage	-0.00168901	0.875707
rs229533	C	CD3+CD56-_LMI1_grandparentPerc__Index1	T cells (CD3+ CD56-)_GrandParentalPercentage	0.00134782	0.878033
rs539514	T	CD3+CD56-_LMI1_grandparentPerc__Index1	T cells (CD3+ CD56-)_GrandParentalPercentage	-0.00115006	0.891631
rs7020673	G	CD3+CD56-_LMI1_grandparentPerc__Index1	T cells (CD3+ CD56-)_GrandParentalPercentage	-0.00102407	0.902897
rs4763879	A	CD3+CD56-_LMI1_grandparentPerc__Index1	T cells (CD3+ CD56-)_GrandParentalPercentage	-0.000685413	0.934012
rs4900384	G	CD3+CD56-_LMI1_grandparentPerc__Index1	T cells (CD3+ CD56-)_GrandParentalPercentage	-0.000372214	0.968519
rs12444268	A	CD3+CD56-_LMI1_grandparentPerc__Index1	T cells (CD3+ CD56-)_GrandParentalPercentage	0.000217851	0.984379
rs4763879	A	CD3+CD56-_LMI1_parentPerc__Index7	T cells (CD3+ CD56-)_ParentalPercentage	-0.0177744	0.0177806
rs924043	C	CD3+CD56-_LMI1_parentPerc__Index7	T cells (CD3+ CD56-)_ParentalPercentage	0.0248636	0.0275382
rs7202877	G	CD3+CD56-_LMI1_parentPerc__Index7	T cells (CD3+ CD56-)_ParentalPercentage	-0.0247841	0.0376577
rs3087243	G	CD3+CD56-_LMI1_parentPerc__Index7	T cells (CD3+ CD56-)_ParentalPercentage	-0.0162121	0.0417277
rs4788084	C	CD3+CD56-_LMI1_parentPerc__Index7	T cells (CD3+ CD56-)_ParentalPercentage	-0.0151873	0.0506279
rs550448	A	CD3+CD56-_LMI1_parentPerc__Index7	T cells (CD3+ CD56-)_ParentalPercentage	-0.0229304	0.0576489
rs12927355	C	CD3+CD56-_LMI1_parentPerc__Index7	T cells (CD3+ CD56-)_ParentalPercentage	-0.012997	0.112097
rs193778	G	CD3+CD56-_LMI1_parentPerc__Index7	T cells (CD3+ CD56-)_ParentalPercentage	0.0126997	0.129819
rs10137082	C	CD3+CD56-_LMI1_parentPerc__Index7	T cells (CD3+ CD56-)_ParentalPercentage	-0.0129497	0.138654
rs2611215	A	CD3+CD56-_LMI1_parentPerc__Index7	T cells (CD3+ CD56-)_ParentalPercentage	-0.0130539	0.170261
rs72727394	T	CD3+CD56-_LMI1_parentPerc__Index7	T cells (CD3+ CD56-)_ParentalPercentage	0.012281	0.186725
rs1052553	A	CD3+CD56-_LMI1_parentPerc__Index7	T cells (CD3+ CD56-)_ParentalPercentage	0.0120802	0.196666
rs5753037	T	CD3+CD56-_LMI1_parentPerc__Index7	T cells (CD3+ CD56-)_ParentalPercentage	-0.00944846	0.235461
rs1615504	T	CD3+CD56-_LMI1_parentPerc__Index7	T cells (CD3+ CD56-)_ParentalPercentage	0.00987067	0.238879
rs2269241	C	CD3+CD56-_LMI1_parentPerc__Index7	T cells (CD3+ CD56-)_ParentalPercentage	-0.0131192	0.250967
rs72928038	A	CD3+CD56-_LMI1_parentPerc__Index7	T cells (CD3+ CD56-)_ParentalPercentage	-0.0120709	0.253236
rs425105	T	CD3+CD56-_LMI1_parentPerc__Index7	T cells (CD3+ CD56-)_ParentalPercentage	0.0124318	0.255301
rs13415583	T	CD3+CD56-_LMI1_parentPerc__Index7	T cells (CD3+ CD56-)_ParentalPercentage	0.00996764	0.25917
rs9585056	C	CD3+CD56-_LMI1_parentPerc__Index7	T cells (CD3+ CD56-)_ParentalPercentage	-0.0102992	0.259409
rs1534422	G	CD3+CD56-_LMI1_parentPerc__Index7	T cells (CD3+ CD56-)_ParentalPercentage	-0.00887059	0.288514
rs10795791	G	CD3+CD56-_LMI1_parentPerc__Index7	T cells (CD3+ CD56-)_ParentalPercentage	0.00848671	0.290528
rs12444268	A	CD3+CD56-_LMI1_parentPerc__Index7	T cells (CD3+ CD56-)_ParentalPercentage	0.0104431	0.302842
rs539514	T	CD3+CD56-_LMI1_parentPerc__Index7	T cells (CD3+ CD56-)_ParentalPercentage	0.00761708	0.321934
rs10517086	A	CD3+CD56-_LMI1_parentPerc__Index7	T cells (CD3+ CD56-)_ParentalPercentage	-0.00793538	0.322882
rs1893217	G	CD3+CD56-_LMI1_parentPerc__Index7	T cells (CD3+ CD56-)_ParentalPercentage	-0.00934573	0.325684
rs689	T	CD3+CD56-_LMI1_parentPerc__Index7	T cells (CD3+ CD56-)_ParentalPercentage	-0.0100892	0.357194
rs4900384	G	CD3+CD56-_LMI1_parentPerc__Index7	T cells (CD3+ CD56-)_ParentalPercentage	-0.00787287	0.359577
rs2292239	T	CD3+CD56-_LMI1_parentPerc__Index7	T cells (CD3+ CD56-)_ParentalPercentage	0.00670182	0.387309
rs56994090	T	CD3+CD56-_LMI1_parentPerc__Index7	T cells (CD3+ CD56-)_ParentalPercentage	-0.00791429	0.399573
rs3024505	G	CD3+CD56-_LMI1_parentPerc__Index7	T cells (CD3+ CD56-)_ParentalPercentage	-0.00905174	0.414295
rs2304256	C	CD3+CD56-_LMI1_parentPerc__Index7	T cells (CD3+ CD56-)_ParentalPercentage	0.00691043	0.430251
rs1983853	C	CD3+CD56-_LMI1_parentPerc__Index7	T cells (CD3+ CD56-)_ParentalPercentage	0.0111896	0.449323
rs11574435	C	CD3+CD56-_LMI1_parentPerc__Index7	T cells (CD3+ CD56-)_ParentalPercentage	-0.0110054	0.456106
rs4505848	G	CD3+CD56-_LMI1_parentPerc__Index7	T cells (CD3+ CD56-)_ParentalPercentage	0.00491142	0.513081
rs6518350	A	CD3+CD56-_LMI1_parentPerc__Index7	T cells (CD3+ CD56-)_ParentalPercentage	0.00699396	0.522825
rs229533	C	CD3+CD56-_LMI1_parentPerc__Index7	T cells (CD3+ CD56-)_ParentalPercentage	-0.00477791	0.550704
rs10786436	T	CD3+CD56-_LMI1_parentPerc__Index7	T cells (CD3+ CD56-)_ParentalPercentage	0.00506508	0.552908
rs478222	A	CD3+CD56-_LMI1_parentPerc__Index7	T cells (CD3+ CD56-)_ParentalPercentage	-0.00423166	0.555579
rs7804356	T	CD3+CD56-_LMI1_parentPerc__Index7	T cells (CD3+ CD56-)_ParentalPercentage	0.00523346	0.562635
rs1990760	T	CD3+CD56-_LMI1_parentPerc__Index7	T cells (CD3+ CD56-)_ParentalPercentage	0.00429692	0.597714
rs653178	C	CD3+CD56-_LMI1_parentPerc__Index7	T cells (CD3+ CD56-)_ParentalPercentage	0.00362919	0.622915
rs7020673	G	CD3+CD56-_LMI1_parentPerc__Index7	T cells (CD3+ CD56-)_ParentalPercentage	-0.00349825	0.647636
rs17166496	G	CD3+CD56-_LMI1_parentPerc__Index7	T cells (CD3+ CD56-)_ParentalPercentage	0.00395923	0.651124
rs4849135	G	CD3+CD56-_LMI1_parentPerc__Index7	T cells (CD3+ CD56-)_ParentalPercentage	0.00369591	0.66701
rs9272346	G	CD3+CD56-_LMI1_parentPerc__Index7	T cells (CD3+ CD56-)_ParentalPercentage	-0.00446465	0.667855
rs11203203	A	CD3+CD56-_LMI1_parentPerc__Index7	T cells (CD3+ CD56-)_ParentalPercentage	-0.00325061	0.678791
rs947474	A	CD3+CD56-_LMI1_parentPerc__Index7	T cells (CD3+ CD56-)_ParentalPercentage	-0.00351011	0.700518
rs62447205	A	CD3+CD56-_LMI1_parentPerc__Index7	T cells (CD3+ CD56-)_ParentalPercentage	-0.00297156	0.72995
rs6691977	C	CD3+CD56-_LMI1_parentPerc__Index7	T cells (CD3+ CD56-)_ParentalPercentage	0.00285355	0.761404
rs516246	T	CD3+CD56-_LMI1_parentPerc__Index7	T cells (CD3+ CD56-)_ParentalPercentage	0.00210453	0.775996
rs11954020	G	CD3+CD56-_LMI1_parentPerc__Index7	T cells (CD3+ CD56-)_ParentalPercentage	0.00202738	0.792263
rs2281808	C	CD3+CD56-_LMI1_parentPerc__Index7	T cells (CD3+ CD56-)_ParentalPercentage	-0.00193878	0.814147
rs2290400	C	CD3+CD56-_LMI1_parentPerc__Index7	T cells (CD3+ CD56-)_ParentalPercentage	-0.00177837	0.82937
rs1465788	C	CD3+CD56-_LMI1_parentPerc__Index7	T cells (CD3+ CD56-)_ParentalPercentage	0.00163616	0.853361
rs16956936	C	CD3+CD56-_LMI1_parentPerc__Index7	T cells (CD3+ CD56-)_ParentalPercentage	0.00210632	0.863959
rs11258747	T	CD3+CD56-_LMI1_parentPerc__Index7	T cells (CD3+ CD56-)_ParentalPercentage	0.00147964	0.865058
rs10509540	T	CD3+CD56-_LMI1_parentPerc__Index7	T cells (CD3+ CD56-)_ParentalPercentage	0.00117053	0.884393
rs12679857	A	CD3+CD56-_LMI1_parentPerc__Index7	T cells (CD3+ CD56-)_ParentalPercentage	-0.000989693	0.904984
rs3825932	T	CD3+CD56-_LMI1_parentPerc__Index7	T cells (CD3+ CD56-)_ParentalPercentage	-0.00068597	0.932534
rs2476601	A	CD3+CD56-_LMI1_parentPerc__Index7	T cells (CD3+ CD56-)_ParentalPercentage	0.000776821	0.937134
rs2165738	C	CD3+CD56-_LMI1_parentPerc__Index7	T cells (CD3+ CD56-)_ParentalPercentage	-0.000555713	0.952353
rs9388489	G	CD3+CD56-_LMI1_parentPerc__Index7	T cells (CD3+ CD56-)_ParentalPercentage	-0.000443415	0.952378
rs6547853	G	CD3+CD56-_LMI1_parentPerc__Index7	T cells (CD3+ CD56-)_ParentalPercentage	-0.000189095	0.979877
rs3024505	G	CD4_LMI1_grandparentPerc__Index7	CD4+ T cells_GrandParentalPercentage	-0.0278824	0.0333883
rs5753037	T	CD4_LMI1_grandparentPerc__Index7	CD4+ T cells_GrandParentalPercentage	-0.0187315	0.0469621
rs11574435	C	CD4_LMI1_grandparentPerc__Index7	CD4+ T cells_GrandParentalPercentage	-0.0343412	0.049289
rs924043	C	CD4_LMI1_grandparentPerc__Index7	CD4+ T cells_GrandParentalPercentage	0.0261602	0.051174
rs2269241	C	CD4_LMI1_grandparentPerc__Index7	CD4+ T cells_GrandParentalPercentage	-0.0258606	0.0560173
rs653178	C	CD4_LMI1_grandparentPerc__Index7	CD4+ T cells_GrandParentalPercentage	0.0162276	0.0630786
rs550448	A	CD4_LMI1_grandparentPerc__Index7	CD4+ T cells_GrandParentalPercentage	-0.0250233	0.0812923
rs2611215	A	CD4_LMI1_grandparentPerc__Index7	CD4+ T cells_GrandParentalPercentage	-0.0188001	0.0959378
rs425105	T	CD4_LMI1_grandparentPerc__Index7	CD4+ T cells_GrandParentalPercentage	0.021221	0.101451
rs4763879	A	CD4_LMI1_grandparentPerc__Index7	CD4+ T cells_GrandParentalPercentage	-0.0143872	0.107489
rs11258747	T	CD4_LMI1_grandparentPerc__Index7	CD4+ T cells_GrandParentalPercentage	-0.0155626	0.131253
rs1990760	T	CD4_LMI1_grandparentPerc__Index7	CD4+ T cells_GrandParentalPercentage	0.0134773	0.162561
rs13415583	T	CD4_LMI1_grandparentPerc__Index7	CD4+ T cells_GrandParentalPercentage	0.0142604	0.173742
rs1534422	G	CD4_LMI1_grandparentPerc__Index7	CD4+ T cells_GrandParentalPercentage	-0.0132838	0.180416
rs193778	G	CD4_LMI1_grandparentPerc__Index7	CD4+ T cells_GrandParentalPercentage	0.0130912	0.188853
rs9388489	G	CD4_LMI1_grandparentPerc__Index7	CD4+ T cells_GrandParentalPercentage	-0.0109915	0.211695
rs947474	A	CD4_LMI1_grandparentPerc__Index7	CD4+ T cells_GrandParentalPercentage	0.0131073	0.225771
rs7202877	G	CD4_LMI1_grandparentPerc__Index7	CD4+ T cells_GrandParentalPercentage	-0.0161211	0.256664
rs72928038	A	CD4_LMI1_grandparentPerc__Index7	CD4+ T cells_GrandParentalPercentage	-0.0140589	0.262525
rs4788084	C	CD4_LMI1_grandparentPerc__Index7	CD4+ T cells_GrandParentalPercentage	-0.0102873	0.266399
rs10137082	C	CD4_LMI1_grandparentPerc__Index7	CD4+ T cells_GrandParentalPercentage	-0.0113774	0.27386
rs2290400	C	CD4_LMI1_grandparentPerc__Index7	CD4+ T cells_GrandParentalPercentage	-0.0106089	0.278343
rs1983853	C	CD4_LMI1_grandparentPerc__Index7	CD4+ T cells_GrandParentalPercentage	0.0189893	0.279301
rs12444268	A	CD4_LMI1_grandparentPerc__Index7	CD4+ T cells_GrandParentalPercentage	0.0127459	0.289592
rs56994090	T	CD4_LMI1_grandparentPerc__Index7	CD4+ T cells_GrandParentalPercentage	-0.0116492	0.296224
rs2165738	C	CD4_LMI1_grandparentPerc__Index7	CD4+ T cells_GrandParentalPercentage	-0.0108892	0.323603
rs11203203	A	CD4_LMI1_grandparentPerc__Index7	CD4+ T cells_GrandParentalPercentage	0.0091281	0.327014
rs229533	C	CD4_LMI1_grandparentPerc__Index7	CD4+ T cells_GrandParentalPercentage	-0.00928094	0.328709
rs3087243	G	CD4_LMI1_grandparentPerc__Index7	CD4+ T cells_GrandParentalPercentage	-0.00917906	0.333528
rs72727394	T	CD4_LMI1_grandparentPerc__Index7	CD4+ T cells_GrandParentalPercentage	-0.0104589	0.344219
rs478222	A	CD4_LMI1_grandparentPerc__Index7	CD4+ T cells_GrandParentalPercentage	-0.00775922	0.362508
rs4505848	G	CD4_LMI1_grandparentPerc__Index7	CD4+ T cells_GrandParentalPercentage	0.00799331	0.369857
rs4900384	G	CD4_LMI1_grandparentPerc__Index7	CD4+ T cells_GrandParentalPercentage	-0.00913707	0.370623
rs9585056	C	CD4_LMI1_grandparentPerc__Index7	CD4+ T cells_GrandParentalPercentage	-0.00877513	0.418789
rs1615504	T	CD4_LMI1_grandparentPerc__Index7	CD4+ T cells_GrandParentalPercentage	0.00801393	0.421115
rs1893217	G	CD4_LMI1_grandparentPerc__Index7	CD4+ T cells_GrandParentalPercentage	-0.00906862	0.422115
rs539514	T	CD4_LMI1_grandparentPerc__Index7	CD4+ T cells_GrandParentalPercentage	0.00705375	0.440112
rs6547853	G	CD4_LMI1_grandparentPerc__Index7	CD4+ T cells_GrandParentalPercentage	-0.0067213	0.449981
rs10509540	T	CD4_LMI1_grandparentPerc__Index7	CD4+ T cells_GrandParentalPercentage	-0.00699109	0.464338
rs12927355	C	CD4_LMI1_grandparentPerc__Index7	CD4+ T cells_GrandParentalPercentage	-0.00696572	0.474428
rs10786436	T	CD4_LMI1_grandparentPerc__Index7	CD4+ T cells_GrandParentalPercentage	0.00642911	0.525895
rs2476601	A	CD4_LMI1_grandparentPerc__Index7	CD4+ T cells_GrandParentalPercentage	-0.00741082	0.526146
rs9272346	G	CD4_LMI1_grandparentPerc__Index7	CD4+ T cells_GrandParentalPercentage	0.00742767	0.547678
rs7804356	T	CD4_LMI1_grandparentPerc__Index7	CD4+ T cells_GrandParentalPercentage	0.00640925	0.550486
rs1465788	C	CD4_LMI1_grandparentPerc__Index7	CD4+ T cells_GrandParentalPercentage	-0.00609001	0.56224
rs2281808	C	CD4_LMI1_grandparentPerc__Index7	CD4+ T cells_GrandParentalPercentage	0.00532498	0.586552
rs6518350	A	CD4_LMI1_grandparentPerc__Index7	CD4+ T cells_GrandParentalPercentage	0.00659937	0.611719
rs2292239	T	CD4_LMI1_grandparentPerc__Index7	CD4+ T cells_GrandParentalPercentage	0.00396893	0.6666
rs17166496	G	CD4_LMI1_grandparentPerc__Index7	CD4+ T cells_GrandParentalPercentage	-0.00404746	0.697099
rs7020673	G	CD4_LMI1_grandparentPerc__Index7	CD4+ T cells_GrandParentalPercentage	-0.00353152	0.697651
rs11954020	G	CD4_LMI1_grandparentPerc__Index7	CD4+ T cells_GrandParentalPercentage	0.00344377	0.706362
rs10517086	A	CD4_LMI1_grandparentPerc__Index7	CD4+ T cells_GrandParentalPercentage	0.00336872	0.72408
rs2304256	C	CD4_LMI1_grandparentPerc__Index7	CD4+ T cells_GrandParentalPercentage	0.0028692	0.782867
rs3825932	T	CD4_LMI1_grandparentPerc__Index7	CD4+ T cells_GrandParentalPercentage	0.00251853	0.793518
rs10795791	G	CD4_LMI1_grandparentPerc__Index7	CD4+ T cells_GrandParentalPercentage	-0.0020249	0.832044
rs12679857	A	CD4_LMI1_grandparentPerc__Index7	CD4+ T cells_GrandParentalPercentage	-0.00147841	0.880646
rs62447205	A	CD4_LMI1_grandparentPerc__Index7	CD4+ T cells_GrandParentalPercentage	-0.00141333	0.890058
rs516246	T	CD4_LMI1_grandparentPerc__Index7	CD4+ T cells_GrandParentalPercentage	0.00106833	0.903201
rs689	T	CD4_LMI1_grandparentPerc__Index7	CD4+ T cells_GrandParentalPercentage	-0.00117646	0.928038
rs4849135	G	CD4_LMI1_grandparentPerc__Index7	CD4+ T cells_GrandParentalPercentage	-0.000756558	0.940893
rs6691977	C	CD4_LMI1_grandparentPerc__Index7	CD4+ T cells_GrandParentalPercentage	0.000696077	0.950275
rs1052553	A	CD4_LMI1_grandparentPerc__Index7	CD4+ T cells_GrandParentalPercentage	-0.00044283	0.968274
rs16956936	C	CD4_LMI1_grandparentPerc__Index7	CD4+ T cells_GrandParentalPercentage	-0.000490854	0.97318
rs72727394	T	CD4_LMI1_parentPerc__Index8	CD4+ T cells_ParentalPercentage	-0.0295156	0.0113054
rs947474	A	CD4_LMI1_parentPerc__Index8	CD4+ T cells_ParentalPercentage	0.0261896	0.0219017
rs5753037	T	CD4_LMI1_parentPerc__Index8	CD4+ T cells_ParentalPercentage	-0.0223613	0.0251852
rs11574435	C	CD4_LMI1_parentPerc__Index8	CD4+ T cells_ParentalPercentage	-0.0402339	0.029729
rs2269241	C	CD4_LMI1_parentPerc__Index8	CD4+ T cells_ParentalPercentage	-0.029759	0.0380266
rs11258747	T	CD4_LMI1_parentPerc__Index8	CD4+ T cells_ParentalPercentage	-0.0216736	0.0471104
rs653178	C	CD4_LMI1_parentPerc__Index8	CD4+ T cells_ParentalPercentage	0.0176672	0.0563953
rs3024505	G	CD4_LMI1_parentPerc__Index8	CD4+ T cells_ParentalPercentage	-0.0257911	0.0639422
rs11203203	A	CD4_LMI1_parentPerc__Index8	CD4+ T cells_ParentalPercentage	0.0154507	0.117166
rs1990760	T	CD4_LMI1_parentPerc__Index8	CD4+ T cells_ParentalPercentage	0.0156396	0.126414
rs13415583	T	CD4_LMI1_parentPerc__Index8	CD4+ T cells_ParentalPercentage	0.0160079	0.149912
rs6547853	G	CD4_LMI1_parentPerc__Index8	CD4+ T cells_ParentalPercentage	-0.0133484	0.15655
rs10517086	A	CD4_LMI1_parentPerc__Index8	CD4+ T cells_ParentalPercentage	0.0133056	0.187855
rs9388489	G	CD4_LMI1_parentPerc__Index8	CD4+ T cells_ParentalPercentage	-0.012201	0.191168
rs425105	T	CD4_LMI1_parentPerc__Index8	CD4+ T cells_ParentalPercentage	0.0173614	0.207126
rs1983853	C	CD4_LMI1_parentPerc__Index8	CD4+ T cells_ParentalPercentage	0.0225085	0.226541
rs10795791	G	CD4_LMI1_parentPerc__Index8	CD4+ T cells_ParentalPercentage	-0.0121879	0.228047
rs1052553	A	CD4_LMI1_parentPerc__Index8	CD4+ T cells_ParentalPercentage	-0.0137144	0.244801
rs2290400	C	CD4_LMI1_parentPerc__Index8	CD4+ T cells_ParentalPercentage	-0.0120467	0.245784
rs2165738	C	CD4_LMI1_parentPerc__Index8	CD4+ T cells_ParentalPercentage	-0.0132974	0.255653
rs1465788	C	CD4_LMI1_parentPerc__Index8	CD4+ T cells_ParentalPercentage	-0.0123366	0.267929
rs2611215	A	CD4_LMI1_parentPerc__Index8	CD4+ T cells_ParentalPercentage	-0.0129048	0.282283
rs924043	C	CD4_LMI1_parentPerc__Index8	CD4+ T cells_ParentalPercentage	0.0143467	0.315028
rs10509540	T	CD4_LMI1_parentPerc__Index8	CD4+ T cells_ParentalPercentage	-0.0097564	0.335506
rs9272346	G	CD4_LMI1_parentPerc__Index8	CD4+ T cells_ParentalPercentage	0.0123347	0.346284
rs12444268	A	CD4_LMI1_parentPerc__Index8	CD4+ T cells_ParentalPercentage	0.0114242	0.371083
rs229533	C	CD4_LMI1_parentPerc__Index8	CD4+ T cells_ParentalPercentage	-0.00854913	0.396497
rs478222	A	CD4_LMI1_parentPerc__Index8	CD4+ T cells_ParentalPercentage	-0.00755182	0.403534
rs193778	G	CD4_LMI1_parentPerc__Index8	CD4+ T cells_ParentalPercentage	0.00871201	0.410355
rs4788084	C	CD4_LMI1_parentPerc__Index8	CD4+ T cells_ParentalPercentage	-0.00683865	0.48653
rs1615504	T	CD4_LMI1_parentPerc__Index8	CD4+ T cells_ParentalPercentage	0.00710378	0.501527
rs56994090	T	CD4_LMI1_parentPerc__Index8	CD4+ T cells_ParentalPercentage	-0.00770896	0.51498
rs1893217	G	CD4_LMI1_parentPerc__Index8	CD4+ T cells_ParentalPercentage	-0.0075526	0.528661
rs17166496	G	CD4_LMI1_parentPerc__Index8	CD4+ T cells_ParentalPercentage	-0.00638446	0.562642
rs550448	A	CD4_LMI1_parentPerc__Index8	CD4+ T cells_ParentalPercentage	-0.00836637	0.583956
rs2476601	A	CD4_LMI1_parentPerc__Index8	CD4+ T cells_ParentalPercentage	-0.00639061	0.6064
rs1534422	G	CD4_LMI1_parentPerc__Index8	CD4+ T cells_ParentalPercentage	-0.00531399	0.614132
rs3087243	G	CD4_LMI1_parentPerc__Index8	CD4+ T cells_ParentalPercentage	0.00501354	0.618838
rs12927355	C	CD4_LMI1_parentPerc__Index8	CD4+ T cells_ParentalPercentage	0.00506447	0.624071
rs2281808	C	CD4_LMI1_parentPerc__Index8	CD4+ T cells_ParentalPercentage	0.00489016	0.637809
rs4505848	G	CD4_LMI1_parentPerc__Index8	CD4+ T cells_ParentalPercentage	0.00430521	0.649128
rs62447205	A	CD4_LMI1_parentPerc__Index8	CD4+ T cells_ParentalPercentage	0.00451341	0.677254
rs72928038	A	CD4_LMI1_parentPerc__Index8	CD4+ T cells_ParentalPercentage	-0.0050641	0.703985
rs4849135	G	CD4_LMI1_parentPerc__Index8	CD4+ T cells_ParentalPercentage	-0.00386122	0.721253
rs539514	T	CD4_LMI1_parentPerc__Index8	CD4+ T cells_ParentalPercentage	0.00327112	0.735895
rs689	T	CD4_LMI1_parentPerc__Index8	CD4+ T cells_ParentalPercentage	0.00462332	0.737914
rs10137082	C	CD4_LMI1_parentPerc__Index8	CD4+ T cells_ParentalPercentage	-0.00337738	0.759763
rs4763879	A	CD4_LMI1_parentPerc__Index8	CD4+ T cells_ParentalPercentage	-0.00258602	0.785698
rs7804356	T	CD4_LMI1_parentPerc__Index8	CD4+ T cells_ParentalPercentage	0.00287981	0.800427
rs4900384	G	CD4_LMI1_parentPerc__Index8	CD4+ T cells_ParentalPercentage	-0.00272847	0.801193
rs6518350	A	CD4_LMI1_parentPerc__Index8	CD4+ T cells_ParentalPercentage	0.0032861	0.811711
rs3825932	T	CD4_LMI1_parentPerc__Index8	CD4+ T cells_ParentalPercentage	0.0022613	0.824675
rs6691977	C	CD4_LMI1_parentPerc__Index8	CD4+ T cells_ParentalPercentage	0.00258372	0.827256
rs7202877	G	CD4_LMI1_parentPerc__Index8	CD4+ T cells_ParentalPercentage	0.00302914	0.840998
rs11954020	G	CD4_LMI1_parentPerc__Index8	CD4+ T cells_ParentalPercentage	0.00191479	0.843478
rs10786436	T	CD4_LMI1_parentPerc__Index8	CD4+ T cells_ParentalPercentage	0.00204486	0.849234
rs2304256	C	CD4_LMI1_parentPerc__Index8	CD4+ T cells_ParentalPercentage	0.00150183	0.891843
rs2292239	T	CD4_LMI1_parentPerc__Index8	CD4+ T cells_ParentalPercentage	-0.000856747	0.930156
rs516246	T	CD4_LMI1_parentPerc__Index8	CD4+ T cells_ParentalPercentage	0.000794596	0.932046
rs12679857	A	CD4_LMI1_parentPerc__Index8	CD4+ T cells_ParentalPercentage	0.000788297	0.93984
rs7020673	G	CD4_LMI1_parentPerc__Index8	CD4+ T cells_ParentalPercentage	-0.000501181	0.958557
rs16956936	C	CD4_LMI1_parentPerc__Index8	CD4+ T cells_ParentalPercentage	-0.000674982	0.965237
rs9585056	C	CD4_LMI1_parentPerc__Index8	CD4+ T cells_ParentalPercentage	6.87513e-05	0.995239
rs3024505	G	CD4_LMI6_grandparentPerc__Index106	CD4+ T cells_GrandParentalPercentage	-0.0284151	0.0187318
rs2281808	C	CD4_LMI6_grandparentPerc__Index106	CD4+ T cells_GrandParentalPercentage	0.0205042	0.022524
rs947474	A	CD4_LMI6_grandparentPerc__Index106	CD4+ T cells_GrandParentalPercentage	0.0209861	0.0350303
rs1990760	T	CD4_LMI6_grandparentPerc__Index106	CD4+ T cells_GrandParentalPercentage	0.0169445	0.0567295
rs72928038	A	CD4_LMI6_grandparentPerc__Index106	CD4+ T cells_GrandParentalPercentage	-0.0192405	0.0961678
rs2611215	A	CD4_LMI6_grandparentPerc__Index106	CD4+ T cells_GrandParentalPercentage	-0.0167904	0.107401
rs11574435	C	CD4_LMI6_grandparentPerc__Index106	CD4+ T cells_GrandParentalPercentage	-0.0224631	0.164666
rs193778	G	CD4_LMI6_grandparentPerc__Index106	CD4+ T cells_GrandParentalPercentage	0.0124082	0.177351
rs10795791	G	CD4_LMI6_grandparentPerc__Index106	CD4+ T cells_GrandParentalPercentage	-0.0118274	0.178802
rs689	T	CD4_LMI6_grandparentPerc__Index106	CD4+ T cells_GrandParentalPercentage	-0.0161093	0.179524
rs1534422	G	CD4_LMI6_grandparentPerc__Index106	CD4+ T cells_GrandParentalPercentage	-0.0121045	0.186235
rs12444268	A	CD4_LMI6_grandparentPerc__Index106	CD4+ T cells_GrandParentalPercentage	0.0139315	0.209738
rs6518350	A	CD4_LMI6_grandparentPerc__Index106	CD4+ T cells_GrandParentalPercentage	-0.0145458	0.224932
rs10786436	T	CD4_LMI6_grandparentPerc__Index106	CD4+ T cells_GrandParentalPercentage	0.0112399	0.229181
rs11258747	T	CD4_LMI6_grandparentPerc__Index106	CD4+ T cells_GrandParentalPercentage	-0.0104301	0.27396
rs539514	T	CD4_LMI6_grandparentPerc__Index106	CD4+ T cells_GrandParentalPercentage	-0.00862951	0.306108
rs9388489	G	CD4_LMI6_grandparentPerc__Index106	CD4+ T cells_GrandParentalPercentage	-0.00826407	0.30948
rs11203203	A	CD4_LMI6_grandparentPerc__Index106	CD4+ T cells_GrandParentalPercentage	0.00828568	0.335295
rs56994090	T	CD4_LMI6_grandparentPerc__Index106	CD4+ T cells_GrandParentalPercentage	0.00965939	0.348348
rs2269241	C	CD4_LMI6_grandparentPerc__Index106	CD4+ T cells_GrandParentalPercentage	-0.0113056	0.367246
rs425105	T	CD4_LMI6_grandparentPerc__Index106	CD4+ T cells_GrandParentalPercentage	0.0107357	0.37061
rs3087243	G	CD4_LMI6_grandparentPerc__Index106	CD4+ T cells_GrandParentalPercentage	-0.00771125	0.379043
rs13415583	T	CD4_LMI6_grandparentPerc__Index106	CD4+ T cells_GrandParentalPercentage	0.00852592	0.379055
rs478222	A	CD4_LMI6_grandparentPerc__Index106	CD4+ T cells_GrandParentalPercentage	-0.00671781	0.39326
rs9272346	G	CD4_LMI6_grandparentPerc__Index106	CD4+ T cells_GrandParentalPercentage	-0.00964014	0.397847
rs7804356	T	CD4_LMI6_grandparentPerc__Index106	CD4+ T cells_GrandParentalPercentage	-0.00820904	0.407391
rs2290400	C	CD4_LMI6_grandparentPerc__Index106	CD4+ T cells_GrandParentalPercentage	-0.00723504	0.423626
rs653178	C	CD4_LMI6_grandparentPerc__Index106	CD4+ T cells_GrandParentalPercentage	0.00641766	0.427574
rs11954020	G	CD4_LMI6_grandparentPerc__Index106	CD4+ T cells_GrandParentalPercentage	-0.00659883	0.43405
rs4900384	G	CD4_LMI6_grandparentPerc__Index106	CD4+ T cells_GrandParentalPercentage	-0.00729344	0.439055
rs1983853	C	CD4_LMI6_grandparentPerc__Index106	CD4+ T cells_GrandParentalPercentage	-0.0117878	0.467363
rs924043	C	CD4_LMI6_grandparentPerc__Index106	CD4+ T cells_GrandParentalPercentage	0.0090253	0.468009
rs2292239	T	CD4_LMI6_grandparentPerc__Index106	CD4+ T cells_GrandParentalPercentage	0.00606605	0.475602
rs516246	T	CD4_LMI6_grandparentPerc__Index106	CD4+ T cells_GrandParentalPercentage	0.00578232	0.475644
rs6547853	G	CD4_LMI6_grandparentPerc__Index106	CD4+ T cells_GrandParentalPercentage	-0.00584638	0.476713
rs2165738	C	CD4_LMI6_grandparentPerc__Index106	CD4+ T cells_GrandParentalPercentage	0.00699209	0.492708
rs2476601	A	CD4_LMI6_grandparentPerc__Index106	CD4+ T cells_GrandParentalPercentage	-0.0071741	0.506292
rs12927355	C	CD4_LMI6_grandparentPerc__Index106	CD4+ T cells_GrandParentalPercentage	-0.00575079	0.522513
rs229533	C	CD4_LMI6_grandparentPerc__Index106	CD4+ T cells_GrandParentalPercentage	-0.00460902	0.599665
rs12679857	A	CD4_LMI6_grandparentPerc__Index106	CD4+ T cells_GrandParentalPercentage	0.00420979	0.643254
rs7202877	G	CD4_LMI6_grandparentPerc__Index106	CD4+ T cells_GrandParentalPercentage	-0.00589419	0.653748
rs72727394	T	CD4_LMI6_grandparentPerc__Index106	CD4+ T cells_GrandParentalPercentage	-0.00452425	0.657951
rs9585056	C	CD4_LMI6_grandparentPerc__Index106	CD4+ T cells_GrandParentalPercentage	-0.004308	0.66746
rs1052553	A	CD4_LMI6_grandparentPerc__Index106	CD4+ T cells_GrandParentalPercentage	-0.00415412	0.686098
rs1465788	C	CD4_LMI6_grandparentPerc__Index106	CD4+ T cells_GrandParentalPercentage	0.00352151	0.716732
rs2304256	C	CD4_LMI6_grandparentPerc__Index106	CD4+ T cells_GrandParentalPercentage	-0.00345086	0.719603
rs10517086	A	CD4_LMI6_grandparentPerc__Index106	CD4+ T cells_GrandParentalPercentage	-0.00313787	0.721753
rs4763879	A	CD4_LMI6_grandparentPerc__Index106	CD4+ T cells_GrandParentalPercentage	-0.00293391	0.723023
rs4788084	C	CD4_LMI6_grandparentPerc__Index106	CD4+ T cells_GrandParentalPercentage	0.00302966	0.723336
rs1893217	G	CD4_LMI6_grandparentPerc__Index106	CD4+ T cells_GrandParentalPercentage	0.00345388	0.740718
rs17166496	G	CD4_LMI6_grandparentPerc__Index106	CD4+ T cells_GrandParentalPercentage	-0.00290939	0.761893
rs6691977	C	CD4_LMI6_grandparentPerc__Index106	CD4+ T cells_GrandParentalPercentage	-0.00267169	0.795444
rs550448	A	CD4_LMI6_grandparentPerc__Index106	CD4+ T cells_GrandParentalPercentage	-0.00331569	0.803159
rs10509540	T	CD4_LMI6_grandparentPerc__Index106	CD4+ T cells_GrandParentalPercentage	0.00204303	0.816966
rs5753037	T	CD4_LMI6_grandparentPerc__Index106	CD4+ T cells_GrandParentalPercentage	-0.0019114	0.827027
rs10137082	C	CD4_LMI6_grandparentPerc__Index106	CD4+ T cells_GrandParentalPercentage	0.00182995	0.849046
rs62447205	A	CD4_LMI6_grandparentPerc__Index106	CD4+ T cells_GrandParentalPercentage	0.00158837	0.866387
rs4849135	G	CD4_LMI6_grandparentPerc__Index106	CD4+ T cells_GrandParentalPercentage	-0.00148558	0.874705
rs7020673	G	CD4_LMI6_grandparentPerc__Index106	CD4+ T cells_GrandParentalPercentage	-0.0012576	0.880918
rs3825932	T	CD4_LMI6_grandparentPerc__Index106	CD4+ T cells_GrandParentalPercentage	0.00115257	0.896789
rs1615504	T	CD4_LMI6_grandparentPerc__Index106	CD4+ T cells_GrandParentalPercentage	0.00055134	0.95224
rs4505848	G	CD4_LMI6_grandparentPerc__Index106	CD4+ T cells_GrandParentalPercentage	0.000432258	0.958156
rs16956936	C	CD4_LMI6_grandparentPerc__Index106	CD4+ T cells_GrandParentalPercentage	-0.000325935	0.980711
rs11574435	C	CD4_LMI6_parentPerc__Index108	CD4+ T cells_ParentalPercentage	-0.0416351	0.0183621
rs3024505	G	CD4_LMI6_parentPerc__Index108	CD4+ T cells_ParentalPercentage	-0.0312404	0.0184608
rs924043	C	CD4_LMI6_parentPerc__Index108	CD4+ T cells_ParentalPercentage	0.0275814	0.0422914
rs72727394	T	CD4_LMI6_parentPerc__Index108	CD4+ T cells_ParentalPercentage	-0.0205621	0.0655482
rs2269241	C	CD4_LMI6_parentPerc__Index108	CD4+ T cells_ParentalPercentage	-0.0247731	0.0708457
rs947474	A	CD4_LMI6_parentPerc__Index108	CD4+ T cells_ParentalPercentage	0.0190209	0.0820712
rs2611215	A	CD4_LMI6_parentPerc__Index108	CD4+ T cells_ParentalPercentage	-0.0194461	0.0890421
rs193778	G	CD4_LMI6_parentPerc__Index108	CD4+ T cells_ParentalPercentage	0.0170377	0.0908953
rs12444268	A	CD4_LMI6_parentPerc__Index108	CD4+ T cells_ParentalPercentage	0.0201085	0.0983816
rs425105	T	CD4_LMI6_parentPerc__Index108	CD4+ T cells_ParentalPercentage	0.0216529	0.0989305
rs653178	C	CD4_LMI6_parentPerc__Index108	CD4+ T cells_ParentalPercentage	0.014049	0.11254
rs5753037	T	CD4_LMI6_parentPerc__Index108	CD4+ T cells_ParentalPercentage	-0.0148312	0.121114
rs1990760	T	CD4_LMI6_parentPerc__Index108	CD4+ T cells_ParentalPercentage	0.0150229	0.124129
rs11203203	A	CD4_LMI6_parentPerc__Index108	CD4+ T cells_ParentalPercentage	0.013069	0.165407
rs11258747	T	CD4_LMI6_parentPerc__Index108	CD4+ T cells_ParentalPercentage	-0.0144843	0.165693
rs478222	A	CD4_LMI6_parentPerc__Index108	CD4+ T cells_ParentalPercentage	-0.0113183	0.189238
rs1534422	G	CD4_LMI6_parentPerc__Index108	CD4+ T cells_ParentalPercentage	-0.0128253	0.201752
rs4900384	G	CD4_LMI6_parentPerc__Index108	CD4+ T cells_ParentalPercentage	-0.0128131	0.214727
rs2281808	C	CD4_LMI6_parentPerc__Index108	CD4+ T cells_ParentalPercentage	0.0119849	0.226204
rs2292239	T	CD4_LMI6_parentPerc__Index108	CD4+ T cells_ParentalPercentage	0.011152	0.231318
rs1983853	C	CD4_LMI6_parentPerc__Index108	CD4+ T cells_ParentalPercentage	0.0211756	0.23346
rs13415583	T	CD4_LMI6_parentPerc__Index108	CD4+ T cells_ParentalPercentage	0.012534	0.238092
rs550448	A	CD4_LMI6_parentPerc__Index108	CD4+ T cells_ParentalPercentage	-0.0167669	0.249797
rs4763879	A	CD4_LMI6_parentPerc__Index108	CD4+ T cells_ParentalPercentage	-0.0101967	0.260812
rs7804356	T	CD4_LMI6_parentPerc__Index108	CD4+ T cells_ParentalPercentage	0.0121241	0.264317
rs10795791	G	CD4_LMI6_parentPerc__Index108	CD4+ T cells_ParentalPercentage	-0.0103863	0.282168
rs9388489	G	CD4_LMI6_parentPerc__Index108	CD4+ T cells_ParentalPercentage	-0.00952263	0.285637
rs229533	C	CD4_LMI6_parentPerc__Index108	CD4+ T cells_ParentalPercentage	-0.0102624	0.286184
rs72928038	A	CD4_LMI6_parentPerc__Index108	CD4+ T cells_ParentalPercentage	-0.0127721	0.315055
rs2290400	C	CD4_LMI6_parentPerc__Index108	CD4+ T cells_ParentalPercentage	-0.00970905	0.327457
rs10517086	A	CD4_LMI6_parentPerc__Index108	CD4+ T cells_ParentalPercentage	0.0093327	0.333786
rs4505848	G	CD4_LMI6_parentPerc__Index108	CD4+ T cells_ParentalPercentage	0.0083091	0.357373
rs539514	T	CD4_LMI6_parentPerc__Index108	CD4+ T cells_ParentalPercentage	0.00699123	0.449993
rs6547853	G	CD4_LMI6_parentPerc__Index108	CD4+ T cells_ParentalPercentage	-0.00672376	0.455597
rs10786436	T	CD4_LMI6_parentPerc__Index108	CD4+ T cells_ParentalPercentage	0.00763984	0.456694
rs7202877	G	CD4_LMI6_parentPerc__Index108	CD4+ T cells_ParentalPercentage	-0.0101226	0.482349
rs2165738	C	CD4_LMI6_parentPerc__Index108	CD4+ T cells_ParentalPercentage	-0.00770814	0.490549
rs1465788	C	CD4_LMI6_parentPerc__Index108	CD4+ T cells_ParentalPercentage	-0.00724444	0.496045
rs10509540	T	CD4_LMI6_parentPerc__Index108	CD4+ T cells_ParentalPercentage	-0.00604454	0.532292
rs3825932	T	CD4_LMI6_parentPerc__Index108	CD4+ T cells_ParentalPercentage	0.00597242	0.539845
rs1893217	G	CD4_LMI6_parentPerc__Index108	CD4+ T cells_ParentalPercentage	-0.00701323	0.540053
rs56994090	T	CD4_LMI6_parentPerc__Index108	CD4+ T cells_ParentalPercentage	-0.00592464	0.600285
rs6518350	A	CD4_LMI6_parentPerc__Index108	CD4+ T cells_ParentalPercentage	0.00677236	0.607029
rs516246	T	CD4_LMI6_parentPerc__Index108	CD4+ T cells_ParentalPercentage	0.00437345	0.62294
rs9585056	C	CD4_LMI6_parentPerc__Index108	CD4+ T cells_ParentalPercentage	-0.0053509	0.6266
rs12927355	C	CD4_LMI6_parentPerc__Index108	CD4+ T cells_ParentalPercentage	-0.00465952	0.636758
rs10137082	C	CD4_LMI6_parentPerc__Index108	CD4+ T cells_ParentalPercentage	-0.00489568	0.642425
rs62447205	A	CD4_LMI6_parentPerc__Index108	CD4+ T cells_ParentalPercentage	0.00479808	0.643055
rs7020673	G	CD4_LMI6_parentPerc__Index108	CD4+ T cells_ParentalPercentage	-0.00419356	0.648751
rs3087243	G	CD4_LMI6_parentPerc__Index108	CD4+ T cells_ParentalPercentage	-0.00437989	0.648986
rs16956936	C	CD4_LMI6_parentPerc__Index108	CD4+ T cells_ParentalPercentage	-0.00656767	0.65687
rs2476601	A	CD4_LMI6_parentPerc__Index108	CD4+ T cells_ParentalPercentage	-0.00434305	0.713874
rs6691977	C	CD4_LMI6_parentPerc__Index108	CD4+ T cells_ParentalPercentage	0.00407885	0.718216
rs4788084	C	CD4_LMI6_parentPerc__Index108	CD4+ T cells_ParentalPercentage	-0.00297693	0.751171
rs12679857	A	CD4_LMI6_parentPerc__Index108	CD4+ T cells_ParentalPercentage	0.0025926	0.794878
rs17166496	G	CD4_LMI6_parentPerc__Index108	CD4+ T cells_ParentalPercentage	-0.00183845	0.861448
rs11954020	G	CD4_LMI6_parentPerc__Index108	CD4+ T cells_ParentalPercentage	0.000829971	0.92858
rs9272346	G	CD4_LMI6_parentPerc__Index108	CD4+ T cells_ParentalPercentage	0.000898262	0.942795
rs689	T	CD4_LMI6_parentPerc__Index108	CD4+ T cells_ParentalPercentage	0.000733924	0.95564
rs4849135	G	CD4_LMI6_parentPerc__Index108	CD4+ T cells_ParentalPercentage	0.000573173	0.955771
rs1052553	A	CD4_LMI6_parentPerc__Index108	CD4+ T cells_ParentalPercentage	0.00053694	0.962024
rs2304256	C	CD4_LMI6_parentPerc__Index108	CD4+ T cells_ParentalPercentage	0.000120137	0.990911
rs1615504	T	CD4_LMI6_parentPerc__Index108	CD4+ T cells_ParentalPercentage	2.15931e-05	0.998294
rs11203203	A	CD4+CD25high_LMI1_grandparentPerc__Index8	Treg(CD4+ CD25+)_GrandParentalPercentage	0.0022766	0.00834606
rs3087243	G	CD4+CD25high_LMI1_grandparentPerc__Index8	Treg(CD4+ CD25+)_GrandParentalPercentage	0.00191041	0.0303213
rs10786436	T	CD4+CD25high_LMI1_grandparentPerc__Index8	Treg(CD4+ CD25+)_GrandParentalPercentage	-0.00163345	0.0833122
rs6547853	G	CD4+CD25high_LMI1_grandparentPerc__Index8	Treg(CD4+ CD25+)_GrandParentalPercentage	-0.00141503	0.0875255
rs72727394	T	CD4+CD25high_LMI1_grandparentPerc__Index8	Treg(CD4+ CD25+)_GrandParentalPercentage	-0.00167746	0.103403
rs9388489	G	CD4+CD25high_LMI1_grandparentPerc__Index8	Treg(CD4+ CD25+)_GrandParentalPercentage	-0.00132218	0.107091
rs10509540	T	CD4+CD25high_LMI1_grandparentPerc__Index8	Treg(CD4+ CD25+)_GrandParentalPercentage	-0.00139691	0.116436
rs2611215	A	CD4+CD25high_LMI1_grandparentPerc__Index8	Treg(CD4+ CD25+)_GrandParentalPercentage	0.00156653	0.137519
rs11574435	C	CD4+CD25high_LMI1_grandparentPerc__Index8	Treg(CD4+ CD25+)_GrandParentalPercentage	-0.00240556	0.140933
rs12927355	C	CD4+CD25high_LMI1_grandparentPerc__Index8	Treg(CD4+ CD25+)_GrandParentalPercentage	0.00126859	0.16213
rs9585056	C	CD4+CD25high_LMI1_grandparentPerc__Index8	Treg(CD4+ CD25+)_GrandParentalPercentage	-0.00139501	0.167895
rs1983853	C	CD4+CD25high_LMI1_grandparentPerc__Index8	Treg(CD4+ CD25+)_GrandParentalPercentage	0.00221954	0.175179
rs7020673	G	CD4+CD25high_LMI1_grandparentPerc__Index8	Treg(CD4+ CD25+)_GrandParentalPercentage	0.00111889	0.186467
rs17166496	G	CD4+CD25high_LMI1_grandparentPerc__Index8	Treg(CD4+ CD25+)_GrandParentalPercentage	-0.00125893	0.193815
rs2304256	C	CD4+CD25high_LMI1_grandparentPerc__Index8	Treg(CD4+ CD25+)_GrandParentalPercentage	-0.00119661	0.217435
rs3024505	G	CD4+CD25high_LMI1_grandparentPerc__Index8	Treg(CD4+ CD25+)_GrandParentalPercentage	0.00145582	0.235848
rs1615504	T	CD4+CD25high_LMI1_grandparentPerc__Index8	Treg(CD4+ CD25+)_GrandParentalPercentage	0.00105108	0.25798
rs56994090	T	CD4+CD25high_LMI1_grandparentPerc__Index8	Treg(CD4+ CD25+)_GrandParentalPercentage	0.00115903	0.265479
rs7804356	T	CD4+CD25high_LMI1_grandparentPerc__Index8	Treg(CD4+ CD25+)_GrandParentalPercentage	0.00108749	0.277358
rs550448	A	CD4+CD25high_LMI1_grandparentPerc__Index8	Treg(CD4+ CD25+)_GrandParentalPercentage	0.00144027	0.283544
rs7202877	G	CD4+CD25high_LMI1_grandparentPerc__Index8	Treg(CD4+ CD25+)_GrandParentalPercentage	-0.00141477	0.286336
rs1990760	T	CD4+CD25high_LMI1_grandparentPerc__Index8	Treg(CD4+ CD25+)_GrandParentalPercentage	-0.000945475	0.294446
rs10137082	C	CD4+CD25high_LMI1_grandparentPerc__Index8	Treg(CD4+ CD25+)_GrandParentalPercentage	-0.00100712	0.299522
rs947474	A	CD4+CD25high_LMI1_grandparentPerc__Index8	Treg(CD4+ CD25+)_GrandParentalPercentage	0.001025	0.310479
rs4788084	C	CD4+CD25high_LMI1_grandparentPerc__Index8	Treg(CD4+ CD25+)_GrandParentalPercentage	0.000869616	0.314338
rs5753037	T	CD4+CD25high_LMI1_grandparentPerc__Index8	Treg(CD4+ CD25+)_GrandParentalPercentage	0.000870361	0.324469
rs193778	G	CD4+CD25high_LMI1_grandparentPerc__Index8	Treg(CD4+ CD25+)_GrandParentalPercentage	0.00088549	0.341526
rs1534422	G	CD4+CD25high_LMI1_grandparentPerc__Index8	Treg(CD4+ CD25+)_GrandParentalPercentage	0.00086711	0.349474
rs1465788	C	CD4+CD25high_LMI1_grandparentPerc__Index8	Treg(CD4+ CD25+)_GrandParentalPercentage	0.000789507	0.420751
rs2292239	T	CD4+CD25high_LMI1_grandparentPerc__Index8	Treg(CD4+ CD25+)_GrandParentalPercentage	-0.000659508	0.442925
rs2165738	C	CD4+CD25high_LMI1_grandparentPerc__Index8	Treg(CD4+ CD25+)_GrandParentalPercentage	-0.000782387	0.447626
rs2269241	C	CD4+CD25high_LMI1_grandparentPerc__Index8	Treg(CD4+ CD25+)_GrandParentalPercentage	-0.000911418	0.47231
rs3825932	T	CD4+CD25high_LMI1_grandparentPerc__Index8	Treg(CD4+ CD25+)_GrandParentalPercentage	-0.000592673	0.50917
rs478222	A	CD4+CD25high_LMI1_grandparentPerc__Index8	Treg(CD4+ CD25+)_GrandParentalPercentage	-0.000416476	0.600811
rs72928038	A	CD4+CD25high_LMI1_grandparentPerc__Index8	Treg(CD4+ CD25+)_GrandParentalPercentage	0.000608499	0.603841
rs689	T	CD4+CD25high_LMI1_grandparentPerc__Index8	Treg(CD4+ CD25+)_GrandParentalPercentage	-0.000619658	0.610234
rs11954020	G	CD4+CD25high_LMI1_grandparentPerc__Index8	Treg(CD4+ CD25+)_GrandParentalPercentage	-0.000414349	0.627216
rs2476601	A	CD4+CD25high_LMI1_grandparentPerc__Index8	Treg(CD4+ CD25+)_GrandParentalPercentage	-0.000528439	0.628301
rs6518350	A	CD4+CD25high_LMI1_grandparentPerc__Index8	Treg(CD4+ CD25+)_GrandParentalPercentage	0.00057842	0.633646
rs16956936	C	CD4+CD25high_LMI1_grandparentPerc__Index8	Treg(CD4+ CD25+)_GrandParentalPercentage	0.00063551	0.640915
rs10795791	G	CD4+CD25high_LMI1_grandparentPerc__Index8	Treg(CD4+ CD25+)_GrandParentalPercentage	0.000383973	0.66655
rs2281808	C	CD4+CD25high_LMI1_grandparentPerc__Index8	Treg(CD4+ CD25+)_GrandParentalPercentage	0.000392918	0.667326
rs12679857	A	CD4+CD25high_LMI1_grandparentPerc__Index8	Treg(CD4+ CD25+)_GrandParentalPercentage	0.000390119	0.671183
rs1052553	A	CD4+CD25high_LMI1_grandparentPerc__Index8	Treg(CD4+ CD25+)_GrandParentalPercentage	-0.00042921	0.67957
rs1893217	G	CD4+CD25high_LMI1_grandparentPerc__Index8	Treg(CD4+ CD25+)_GrandParentalPercentage	0.000435751	0.679625
rs13415583	T	CD4+CD25high_LMI1_grandparentPerc__Index8	Treg(CD4+ CD25+)_GrandParentalPercentage	0.000388392	0.692056
rs9272346	G	CD4+CD25high_LMI1_grandparentPerc__Index8	Treg(CD4+ CD25+)_GrandParentalPercentage	-0.000438576	0.703792
rs4849135	G	CD4+CD25high_LMI1_grandparentPerc__Index8	Treg(CD4+ CD25+)_GrandParentalPercentage	-0.000356324	0.708285
rs425105	T	CD4+CD25high_LMI1_grandparentPerc__Index8	Treg(CD4+ CD25+)_GrandParentalPercentage	-0.000440415	0.716594
rs4763879	A	CD4+CD25high_LMI1_grandparentPerc__Index8	Treg(CD4+ CD25+)_GrandParentalPercentage	0.000263506	0.752873
rs653178	C	CD4+CD25high_LMI1_grandparentPerc__Index8	Treg(CD4+ CD25+)_GrandParentalPercentage	0.000203167	0.803936
rs12444268	A	CD4+CD25high_LMI1_grandparentPerc__Index8	Treg(CD4+ CD25+)_GrandParentalPercentage	-0.000256852	0.819398
rs11258747	T	CD4+CD25high_LMI1_grandparentPerc__Index8	Treg(CD4+ CD25+)_GrandParentalPercentage	0.000199262	0.836445
rs4505848	G	CD4+CD25high_LMI1_grandparentPerc__Index8	Treg(CD4+ CD25+)_GrandParentalPercentage	0.000130896	0.875117
rs6691977	C	CD4+CD25high_LMI1_grandparentPerc__Index8	Treg(CD4+ CD25+)_GrandParentalPercentage	0.00015377	0.882672
rs516246	T	CD4+CD25high_LMI1_grandparentPerc__Index8	Treg(CD4+ CD25+)_GrandParentalPercentage	-0.000110866	0.892452
rs2290400	C	CD4+CD25high_LMI1_grandparentPerc__Index8	Treg(CD4+ CD25+)_GrandParentalPercentage	-0.000110268	0.90406
rs4900384	G	CD4+CD25high_LMI1_grandparentPerc__Index8	Treg(CD4+ CD25+)_GrandParentalPercentage	0.0001141	0.904757
rs62447205	A	CD4+CD25high_LMI1_grandparentPerc__Index8	Treg(CD4+ CD25+)_GrandParentalPercentage	-9.46165e-05	0.921033
rs539514	T	CD4+CD25high_LMI1_grandparentPerc__Index8	Treg(CD4+ CD25+)_GrandParentalPercentage	-4.98628e-05	0.953415
rs10517086	A	CD4+CD25high_LMI1_grandparentPerc__Index8	Treg(CD4+ CD25+)_GrandParentalPercentage	1.82923e-05	0.983619
rs924043	C	CD4+CD25high_LMI1_grandparentPerc__Index8	Treg(CD4+ CD25+)_GrandParentalPercentage	-2.17115e-05	0.986231
rs229533	C	CD4+CD25high_LMI1_grandparentPerc__Index8	Treg(CD4+ CD25+)_GrandParentalPercentage	-1.40359e-06	0.998739
rs10786436	T	CD4+CD25high_LMI1_parentPerc__Index12	Treg(CD4+ CD25+)_ParentalPercentage	-0.00284628	0.0327772
rs11203203	A	CD4+CD25high_LMI1_parentPerc__Index12	Treg(CD4+ CD25+)_ParentalPercentage	0.00248062	0.0431296
rs5753037	T	CD4+CD25high_LMI1_parentPerc__Index12	Treg(CD4+ CD25+)_ParentalPercentage	0.00247589	0.0470005
rs3087243	G	CD4+CD25high_LMI1_parentPerc__Index12	Treg(CD4+ CD25+)_ParentalPercentage	0.00236664	0.0584858
rs3024505	G	CD4+CD25high_LMI1_parentPerc__Index12	Treg(CD4+ CD25+)_ParentalPercentage	0.00319324	0.0657074
rs2611215	A	CD4+CD25high_LMI1_parentPerc__Index12	Treg(CD4+ CD25+)_ParentalPercentage	0.00274166	0.066079
rs1990760	T	CD4+CD25high_LMI1_parentPerc__Index12	Treg(CD4+ CD25+)_ParentalPercentage	-0.00221606	0.0819982
rs7020673	G	CD4+CD25high_LMI1_parentPerc__Index12	Treg(CD4+ CD25+)_ParentalPercentage	0.0018525	0.122179
rs1534422	G	CD4+CD25high_LMI1_parentPerc__Index12	Treg(CD4+ CD25+)_ParentalPercentage	0.00195777	0.135159
rs56994090	T	CD4+CD25high_LMI1_parentPerc__Index12	Treg(CD4+ CD25+)_ParentalPercentage	0.0020258	0.169015
rs550448	A	CD4+CD25high_LMI1_parentPerc__Index12	Treg(CD4+ CD25+)_ParentalPercentage	0.00254377	0.180752
rs12927355	C	CD4+CD25high_LMI1_parentPerc__Index12	Treg(CD4+ CD25+)_ParentalPercentage	0.00171621	0.181834
rs6547853	G	CD4+CD25high_LMI1_parentPerc__Index12	Treg(CD4+ CD25+)_ParentalPercentage	-0.00149047	0.204521
rs9585056	C	CD4+CD25high_LMI1_parentPerc__Index12	Treg(CD4+ CD25+)_ParentalPercentage	-0.00178636	0.212628
rs7202877	G	CD4+CD25high_LMI1_parentPerc__Index12	Treg(CD4+ CD25+)_ParentalPercentage	-0.00234059	0.212712
rs2304256	C	CD4+CD25high_LMI1_parentPerc__Index12	Treg(CD4+ CD25+)_ParentalPercentage	-0.00165247	0.229139
rs4788084	C	CD4+CD25high_LMI1_parentPerc__Index12	Treg(CD4+ CD25+)_ParentalPercentage	0.00145226	0.235207
rs1465788	C	CD4+CD25high_LMI1_parentPerc__Index12	Treg(CD4+ CD25+)_ParentalPercentage	0.00164423	0.235995
rs10509540	T	CD4+CD25high_LMI1_parentPerc__Index12	Treg(CD4+ CD25+)_ParentalPercentage	-0.00146573	0.245405
rs11258747	T	CD4+CD25high_LMI1_parentPerc__Index12	Treg(CD4+ CD25+)_ParentalPercentage	0.00156094	0.252762
rs9388489	G	CD4+CD25high_LMI1_parentPerc__Index12	Treg(CD4+ CD25+)_ParentalPercentage	-0.00132816	0.25379
rs9272346	G	CD4+CD25high_LMI1_parentPerc__Index12	Treg(CD4+ CD25+)_ParentalPercentage	-0.00178423	0.274136
rs7804356	T	CD4+CD25high_LMI1_parentPerc__Index12	Treg(CD4+ CD25+)_ParentalPercentage	0.00150069	0.289874
rs17166496	G	CD4+CD25high_LMI1_parentPerc__Index12	Treg(CD4+ CD25+)_ParentalPercentage	-0.0013847	0.313289
rs10137082	C	CD4+CD25high_LMI1_parentPerc__Index12	Treg(CD4+ CD25+)_ParentalPercentage	-0.00132795	0.334165
rs425105	T	CD4+CD25high_LMI1_parentPerc__Index12	Treg(CD4+ CD25+)_ParentalPercentage	-0.00161782	0.345955
rs689	T	CD4+CD25high_LMI1_parentPerc__Index12	Treg(CD4+ CD25+)_ParentalPercentage	-0.00141057	0.412356
rs3825932	T	CD4+CD25high_LMI1_parentPerc__Index12	Treg(CD4+ CD25+)_ParentalPercentage	-0.0010347	0.415647
rs1615504	T	CD4+CD25high_LMI1_parentPerc__Index12	Treg(CD4+ CD25+)_ParentalPercentage	0.00107176	0.41573
rs10795791	G	CD4+CD25high_LMI1_parentPerc__Index12	Treg(CD4+ CD25+)_ParentalPercentage	0.00102178	0.417877
rs1983853	C	CD4+CD25high_LMI1_parentPerc__Index12	Treg(CD4+ CD25+)_ParentalPercentage	0.00187954	0.418223
rs72928038	A	CD4+CD25high_LMI1_parentPerc__Index12	Treg(CD4+ CD25+)_ParentalPercentage	0.00125208	0.45074
rs11954020	G	CD4+CD25high_LMI1_parentPerc__Index12	Treg(CD4+ CD25+)_ParentalPercentage	-0.000907062	0.452653
rs193778	G	CD4+CD25high_LMI1_parentPerc__Index12	Treg(CD4+ CD25+)_ParentalPercentage	0.000959528	0.46695
rs1893217	G	CD4+CD25high_LMI1_parentPerc__Index12	Treg(CD4+ CD25+)_ParentalPercentage	0.00108443	0.467825
rs653178	C	CD4+CD25high_LMI1_parentPerc__Index12	Treg(CD4+ CD25+)_ParentalPercentage	-0.000798664	0.490538
rs2292239	T	CD4+CD25high_LMI1_parentPerc__Index12	Treg(CD4+ CD25+)_ParentalPercentage	-0.000786852	0.518115
rs11574435	C	CD4+CD25high_LMI1_parentPerc__Index12	Treg(CD4+ CD25+)_ParentalPercentage	-0.00141299	0.542303
rs12444268	A	CD4+CD25high_LMI1_parentPerc__Index12	Treg(CD4+ CD25+)_ParentalPercentage	-0.000934002	0.557569
rs12679857	A	CD4+CD25high_LMI1_parentPerc__Index12	Treg(CD4+ CD25+)_ParentalPercentage	0.000687552	0.597242
rs72727394	T	CD4+CD25high_LMI1_parentPerc__Index12	Treg(CD4+ CD25+)_ParentalPercentage	-0.000743639	0.611231
rs16956936	C	CD4+CD25high_LMI1_parentPerc__Index12	Treg(CD4+ CD25+)_ParentalPercentage	0.000927701	0.630674
rs6518350	A	CD4+CD25high_LMI1_parentPerc__Index12	Treg(CD4+ CD25+)_ParentalPercentage	0.000668437	0.697371
rs229533	C	CD4+CD25high_LMI1_parentPerc__Index12	Treg(CD4+ CD25+)_ParentalPercentage	0.000469433	0.708905
rs10517086	A	CD4+CD25high_LMI1_parentPerc__Index12	Treg(CD4+ CD25+)_ParentalPercentage	-0.000468132	0.710579
rs4505848	G	CD4+CD25high_LMI1_parentPerc__Index12	Treg(CD4+ CD25+)_ParentalPercentage	-0.000403178	0.73246
rs4763879	A	CD4+CD25high_LMI1_parentPerc__Index12	Treg(CD4+ CD25+)_ParentalPercentage	0.000395335	0.738717
rs2476601	A	CD4+CD25high_LMI1_parentPerc__Index12	Treg(CD4+ CD25+)_ParentalPercentage	-0.000494653	0.749017
rs2290400	C	CD4+CD25high_LMI1_parentPerc__Index12	Treg(CD4+ CD25+)_ParentalPercentage	0.000339624	0.793201
rs924043	C	CD4+CD25high_LMI1_parentPerc__Index12	Treg(CD4+ CD25+)_ParentalPercentage	-0.000453884	0.798902
rs947474	A	CD4+CD25high_LMI1_parentPerc__Index12	Treg(CD4+ CD25+)_ParentalPercentage	0.000332017	0.816769
rs478222	A	CD4+CD25high_LMI1_parentPerc__Index12	Treg(CD4+ CD25+)_ParentalPercentage	-0.000220553	0.844923
rs2165738	C	CD4+CD25high_LMI1_parentPerc__Index12	Treg(CD4+ CD25+)_ParentalPercentage	-0.000278945	0.848486
rs2281808	C	CD4+CD25high_LMI1_parentPerc__Index12	Treg(CD4+ CD25+)_ParentalPercentage	0.000172998	0.893717
rs62447205	A	CD4+CD25high_LMI1_parentPerc__Index12	Treg(CD4+ CD25+)_ParentalPercentage	-0.000173906	0.897627
rs539514	T	CD4+CD25high_LMI1_parentPerc__Index12	Treg(CD4+ CD25+)_ParentalPercentage	-0.000142143	0.906389
rs516246	T	CD4+CD25high_LMI1_parentPerc__Index12	Treg(CD4+ CD25+)_ParentalPercentage	-0.000120535	0.917333
rs1052553	A	CD4+CD25high_LMI1_parentPerc__Index12	Treg(CD4+ CD25+)_ParentalPercentage	-0.0001468	0.920554
rs4849135	G	CD4+CD25high_LMI1_parentPerc__Index12	Treg(CD4+ CD25+)_ParentalPercentage	-0.000127048	0.924961
rs2269241	C	CD4+CD25high_LMI1_parentPerc__Index12	Treg(CD4+ CD25+)_ParentalPercentage	0.000144045	0.936111
rs4900384	G	CD4+CD25high_LMI1_parentPerc__Index12	Treg(CD4+ CD25+)_ParentalPercentage	9.57851e-05	0.943456
rs13415583	T	CD4+CD25high_LMI1_parentPerc__Index12	Treg(CD4+ CD25+)_ParentalPercentage	-3.59833e-05	0.979333
rs6691977	C	CD4+CD25high_LMI1_parentPerc__Index12	Treg(CD4+ CD25+)_ParentalPercentage	1.4195e-05	0.992325
rs3087243	G	CD4+CMCD45RA-CD27+_LMI2_grandparentPerc__Index21	CD4+ CM CD45RA- CD27+_GrandParentalPercentage	0.0246261	0.0104118
rs3024505	G	CD4+CMCD45RA-CD27+_LMI2_grandparentPerc__Index21	CD4+ CM CD45RA- CD27+_GrandParentalPercentage	-0.0317863	0.0172247
rs653178	C	CD4+CMCD45RA-CD27+_LMI2_grandparentPerc__Index21	CD4+ CM CD45RA- CD27+_GrandParentalPercentage	0.0204019	0.0216289
rs9272346	G	CD4+CMCD45RA-CD27+_LMI2_grandparentPerc__Index21	CD4+ CM CD45RA- CD27+_GrandParentalPercentage	0.0279827	0.0254842
rs1465788	C	CD4+CMCD45RA-CD27+_LMI2_grandparentPerc__Index21	CD4+ CM CD45RA- CD27+_GrandParentalPercentage	-0.0231878	0.0295846
rs4505848	G	CD4+CMCD45RA-CD27+_LMI2_grandparentPerc__Index21	CD4+ CM CD45RA- CD27+_GrandParentalPercentage	0.0187921	0.0378535
rs4788084	C	CD4+CMCD45RA-CD27+_LMI2_grandparentPerc__Index21	CD4+ CM CD45RA- CD27+_GrandParentalPercentage	0.0163011	0.0834699
rs11203203	A	CD4+CMCD45RA-CD27+_LMI2_grandparentPerc__Index21	CD4+ CM CD45RA- CD27+_GrandParentalPercentage	0.0148174	0.117998
rs10137082	C	CD4+CMCD45RA-CD27+_LMI2_grandparentPerc__Index21	CD4+ CM CD45RA- CD27+_GrandParentalPercentage	-0.0145778	0.168758
rs2476601	A	CD4+CMCD45RA-CD27+_LMI2_grandparentPerc__Index21	CD4+ CM CD45RA- CD27+_GrandParentalPercentage	0.0155826	0.190424
rs2292239	T	CD4+CMCD45RA-CD27+_LMI2_grandparentPerc__Index21	CD4+ CM CD45RA- CD27+_GrandParentalPercentage	-0.0121326	0.195678
rs10509540	T	CD4+CMCD45RA-CD27+_LMI2_grandparentPerc__Index21	CD4+ CM CD45RA- CD27+_GrandParentalPercentage	-0.0114887	0.237781
rs1534422	G	CD4+CMCD45RA-CD27+_LMI2_grandparentPerc__Index21	CD4+ CM CD45RA- CD27+_GrandParentalPercentage	0.0113927	0.260179
rs13415583	T	CD4+CMCD45RA-CD27+_LMI2_grandparentPerc__Index21	CD4+ CM CD45RA- CD27+_GrandParentalPercentage	-0.0119794	0.262754
rs2281808	C	CD4+CMCD45RA-CD27+_LMI2_grandparentPerc__Index21	CD4+ CM CD45RA- CD27+_GrandParentalPercentage	0.0111138	0.265067
rs4849135	G	CD4+CMCD45RA-CD27+_LMI2_grandparentPerc__Index21	CD4+ CM CD45RA- CD27+_GrandParentalPercentage	-0.0106392	0.305867
rs6547853	G	CD4+CMCD45RA-CD27+_LMI2_grandparentPerc__Index21	CD4+ CM CD45RA- CD27+_GrandParentalPercentage	-0.00917852	0.311378
rs5753037	T	CD4+CMCD45RA-CD27+_LMI2_grandparentPerc__Index21	CD4+ CM CD45RA- CD27+_GrandParentalPercentage	-0.00968694	0.315356
rs4763879	A	CD4+CMCD45RA-CD27+_LMI2_grandparentPerc__Index21	CD4+ CM CD45RA- CD27+_GrandParentalPercentage	-0.00884837	0.332577
rs689	T	CD4+CMCD45RA-CD27+_LMI2_grandparentPerc__Index21	CD4+ CM CD45RA- CD27+_GrandParentalPercentage	-0.0119967	0.365934
rs6691977	C	CD4+CMCD45RA-CD27+_LMI2_grandparentPerc__Index21	CD4+ CM CD45RA- CD27+_GrandParentalPercentage	-0.0101278	0.373064
rs9388489	G	CD4+CMCD45RA-CD27+_LMI2_grandparentPerc__Index21	CD4+ CM CD45RA- CD27+_GrandParentalPercentage	-0.00772383	0.38985
rs1052553	A	CD4+CMCD45RA-CD27+_LMI2_grandparentPerc__Index21	CD4+ CM CD45RA- CD27+_GrandParentalPercentage	0.0096824	0.393297
rs3825932	T	CD4+CMCD45RA-CD27+_LMI2_grandparentPerc__Index21	CD4+ CM CD45RA- CD27+_GrandParentalPercentage	0.00767817	0.433547
rs2304256	C	CD4+CMCD45RA-CD27+_LMI2_grandparentPerc__Index21	CD4+ CM CD45RA- CD27+_GrandParentalPercentage	-0.00806881	0.446923
rs2165738	C	CD4+CMCD45RA-CD27+_LMI2_grandparentPerc__Index21	CD4+ CM CD45RA- CD27+_GrandParentalPercentage	-0.00818504	0.467051
rs193778	G	CD4+CMCD45RA-CD27+_LMI2_grandparentPerc__Index21	CD4+ CM CD45RA- CD27+_GrandParentalPercentage	-0.0068582	0.500259
rs62447205	A	CD4+CMCD45RA-CD27+_LMI2_grandparentPerc__Index21	CD4+ CM CD45RA- CD27+_GrandParentalPercentage	-0.00699069	0.502269
rs425105	T	CD4+CMCD45RA-CD27+_LMI2_grandparentPerc__Index21	CD4+ CM CD45RA- CD27+_GrandParentalPercentage	0.00872997	0.509876
rs56994090	T	CD4+CMCD45RA-CD27+_LMI2_grandparentPerc__Index21	CD4+ CM CD45RA- CD27+_GrandParentalPercentage	-0.00746383	0.511909
rs229533	C	CD4+CMCD45RA-CD27+_LMI2_grandparentPerc__Index21	CD4+ CM CD45RA- CD27+_GrandParentalPercentage	-0.00619207	0.523025
rs12444268	A	CD4+CMCD45RA-CD27+_LMI2_grandparentPerc__Index21	CD4+ CM CD45RA- CD27+_GrandParentalPercentage	-0.00773696	0.528749
rs16956936	C	CD4+CMCD45RA-CD27+_LMI2_grandparentPerc__Index21	CD4+ CM CD45RA- CD27+_GrandParentalPercentage	-0.00805823	0.588156
rs12679857	A	CD4+CMCD45RA-CD27+_LMI2_grandparentPerc__Index21	CD4+ CM CD45RA- CD27+_GrandParentalPercentage	0.00518565	0.605375
rs516246	T	CD4+CMCD45RA-CD27+_LMI2_grandparentPerc__Index21	CD4+ CM CD45RA- CD27+_GrandParentalPercentage	0.00458053	0.608953
rs2611215	A	CD4+CMCD45RA-CD27+_LMI2_grandparentPerc__Index21	CD4+ CM CD45RA- CD27+_GrandParentalPercentage	0.00543295	0.638059
rs1990760	T	CD4+CMCD45RA-CD27+_LMI2_grandparentPerc__Index21	CD4+ CM CD45RA- CD27+_GrandParentalPercentage	0.00452823	0.646078
rs12927355	C	CD4+CMCD45RA-CD27+_LMI2_grandparentPerc__Index21	CD4+ CM CD45RA- CD27+_GrandParentalPercentage	0.00432706	0.663114
rs7202877	G	CD4+CMCD45RA-CD27+_LMI2_grandparentPerc__Index21	CD4+ CM CD45RA- CD27+_GrandParentalPercentage	0.00616109	0.671131
rs1983853	C	CD4+CMCD45RA-CD27+_LMI2_grandparentPerc__Index21	CD4+ CM CD45RA- CD27+_GrandParentalPercentage	0.00747734	0.676451
rs10786436	T	CD4+CMCD45RA-CD27+_LMI2_grandparentPerc__Index21	CD4+ CM CD45RA- CD27+_GrandParentalPercentage	-0.00404085	0.695889
rs11954020	G	CD4+CMCD45RA-CD27+_LMI2_grandparentPerc__Index21	CD4+ CM CD45RA- CD27+_GrandParentalPercentage	-0.00363959	0.696156
rs17166496	G	CD4+CMCD45RA-CD27+_LMI2_grandparentPerc__Index21	CD4+ CM CD45RA- CD27+_GrandParentalPercentage	0.00390318	0.712773
rs478222	A	CD4+CMCD45RA-CD27+_LMI2_grandparentPerc__Index21	CD4+ CM CD45RA- CD27+_GrandParentalPercentage	0.00313388	0.718547
rs72928038	A	CD4+CMCD45RA-CD27+_LMI2_grandparentPerc__Index21	CD4+ CM CD45RA- CD27+_GrandParentalPercentage	0.00424785	0.740217
rs550448	A	CD4+CMCD45RA-CD27+_LMI2_grandparentPerc__Index21	CD4+ CM CD45RA- CD27+_GrandParentalPercentage	-0.00461278	0.753486
rs11258747	T	CD4+CMCD45RA-CD27+_LMI2_grandparentPerc__Index21	CD4+ CM CD45RA- CD27+_GrandParentalPercentage	0.00311353	0.767734
rs4900384	G	CD4+CMCD45RA-CD27+_LMI2_grandparentPerc__Index21	CD4+ CM CD45RA- CD27+_GrandParentalPercentage	-0.00302857	0.771208
rs2269241	C	CD4+CMCD45RA-CD27+_LMI2_grandparentPerc__Index21	CD4+ CM CD45RA- CD27+_GrandParentalPercentage	0.00385308	0.780988
rs924043	C	CD4+CMCD45RA-CD27+_LMI2_grandparentPerc__Index21	CD4+ CM CD45RA- CD27+_GrandParentalPercentage	0.00373379	0.785823
rs1615504	T	CD4+CMCD45RA-CD27+_LMI2_grandparentPerc__Index21	CD4+ CM CD45RA- CD27+_GrandParentalPercentage	-0.00190908	0.851019
rs539514	T	CD4+CMCD45RA-CD27+_LMI2_grandparentPerc__Index21	CD4+ CM CD45RA- CD27+_GrandParentalPercentage	0.00159632	0.864041
rs2290400	C	CD4+CMCD45RA-CD27+_LMI2_grandparentPerc__Index21	CD4+ CM CD45RA- CD27+_GrandParentalPercentage	-0.00164476	0.869256
rs72727394	T	CD4+CMCD45RA-CD27+_LMI2_grandparentPerc__Index21	CD4+ CM CD45RA- CD27+_GrandParentalPercentage	-0.00144246	0.898304
rs11574435	C	CD4+CMCD45RA-CD27+_LMI2_grandparentPerc__Index21	CD4+ CM CD45RA- CD27+_GrandParentalPercentage	0.00227197	0.898957
rs9585056	C	CD4+CMCD45RA-CD27+_LMI2_grandparentPerc__Index21	CD4+ CM CD45RA- CD27+_GrandParentalPercentage	-0.00102048	0.926583
rs10517086	A	CD4+CMCD45RA-CD27+_LMI2_grandparentPerc__Index21	CD4+ CM CD45RA- CD27+_GrandParentalPercentage	-0.000826494	0.932316
rs947474	A	CD4+CMCD45RA-CD27+_LMI2_grandparentPerc__Index21	CD4+ CM CD45RA- CD27+_GrandParentalPercentage	-0.000898165	0.935232
rs10795791	G	CD4+CMCD45RA-CD27+_LMI2_grandparentPerc__Index21	CD4+ CM CD45RA- CD27+_GrandParentalPercentage	-0.000595325	0.95124
rs7804356	T	CD4+CMCD45RA-CD27+_LMI2_grandparentPerc__Index21	CD4+ CM CD45RA- CD27+_GrandParentalPercentage	0.00066502	0.951574
rs6518350	A	CD4+CMCD45RA-CD27+_LMI2_grandparentPerc__Index21	CD4+ CM CD45RA- CD27+_GrandParentalPercentage	-0.000781532	0.953
rs7020673	G	CD4+CMCD45RA-CD27+_LMI2_grandparentPerc__Index21	CD4+ CM CD45RA- CD27+_GrandParentalPercentage	-0.000283165	0.975632
rs1893217	G	CD4+CMCD45RA-CD27+_LMI2_grandparentPerc__Index21	CD4+ CM CD45RA- CD27+_GrandParentalPercentage	8.26937e-05	0.994276
rs3087243	G	CD4+CMCD45RA-CD27+_LMI2_parentPerc__Index22	CD4+ CM CD45RA- CD27+_ParentalPercentage	0.037908	0.0044262
rs1465788	C	CD4+CMCD45RA-CD27+_LMI2_parentPerc__Index22	CD4+ CM CD45RA- CD27+_ParentalPercentage	-0.0325456	0.027807
rs2269241	C	CD4+CMCD45RA-CD27+_LMI2_parentPerc__Index22	CD4+ CM CD45RA- CD27+_ParentalPercentage	0.0399387	0.0369062
rs13415583	T	CD4+CMCD45RA-CD27+_LMI2_parentPerc__Index22	CD4+ CM CD45RA- CD27+_ParentalPercentage	-0.0304724	0.0394397
rs4788084	C	CD4+CMCD45RA-CD27+_LMI2_parentPerc__Index22	CD4+ CM CD45RA- CD27+_ParentalPercentage	0.0249654	0.055987
rs9272346	G	CD4+CMCD45RA-CD27+_LMI2_parentPerc__Index22	CD4+ CM CD45RA- CD27+_ParentalPercentage	0.0319809	0.0664114
rs4505848	G	CD4+CMCD45RA-CD27+_LMI2_parentPerc__Index22	CD4+ CM CD45RA- CD27+_ParentalPercentage	0.0230286	0.0671167
rs11574435	C	CD4+CMCD45RA-CD27+_LMI2_parentPerc__Index22	CD4+ CM CD45RA- CD27+_ParentalPercentage	0.043728	0.0772024
rs1534422	G	CD4+CMCD45RA-CD27+_LMI2_parentPerc__Index22	CD4+ CM CD45RA- CD27+_ParentalPercentage	0.0245863	0.0793839
rs2476601	A	CD4+CMCD45RA-CD27+_LMI2_parentPerc__Index22	CD4+ CM CD45RA- CD27+_ParentalPercentage	0.0283834	0.0853228
rs2611215	A	CD4+CMCD45RA-CD27+_LMI2_parentPerc__Index22	CD4+ CM CD45RA- CD27+_ParentalPercentage	0.0267778	0.0938445
rs11258747	T	CD4+CMCD45RA-CD27+_LMI2_parentPerc__Index22	CD4+ CM CD45RA- CD27+_ParentalPercentage	0.0242472	0.0964655
rs947474	A	CD4+CMCD45RA-CD27+_LMI2_parentPerc__Index22	CD4+ CM CD45RA- CD27+_ParentalPercentage	-0.0248024	0.104869
rs689	T	CD4+CMCD45RA-CD27+_LMI2_parentPerc__Index22	CD4+ CM CD45RA- CD27+_ParentalPercentage	-0.0297892	0.105063
rs72727394	T	CD4+CMCD45RA-CD27+_LMI2_parentPerc__Index22	CD4+ CM CD45RA- CD27+_ParentalPercentage	0.0250126	0.109293
rs1052553	A	CD4+CMCD45RA-CD27+_LMI2_parentPerc__Index22	CD4+ CM CD45RA- CD27+_ParentalPercentage	0.0246357	0.116898
rs653178	C	CD4+CMCD45RA-CD27+_LMI2_parentPerc__Index22	CD4+ CM CD45RA- CD27+_ParentalPercentage	0.0192123	0.120494
rs3024505	G	CD4+CMCD45RA-CD27+_LMI2_parentPerc__Index22	CD4+ CM CD45RA- CD27+_ParentalPercentage	-0.0283649	0.127268
rs12444268	A	CD4+CMCD45RA-CD27+_LMI2_parentPerc__Index22	CD4+ CM CD45RA- CD27+_ParentalPercentage	-0.0248625	0.143946
rs2292239	T	CD4+CMCD45RA-CD27+_LMI2_parentPerc__Index22	CD4+ CM CD45RA- CD27+_ParentalPercentage	-0.0174078	0.181026
rs6691977	C	CD4+CMCD45RA-CD27+_LMI2_parentPerc__Index22	CD4+ CM CD45RA- CD27+_ParentalPercentage	-0.0194556	0.217299
rs193778	G	CD4+CMCD45RA-CD27+_LMI2_parentPerc__Index22	CD4+ CM CD45RA- CD27+_ParentalPercentage	-0.0156578	0.267137
rs10517086	A	CD4+CMCD45RA-CD27+_LMI2_parentPerc__Index22	CD4+ CM CD45RA- CD27+_ParentalPercentage	-0.0142668	0.290273
rs478222	A	CD4+CMCD45RA-CD27+_LMI2_parentPerc__Index22	CD4+ CM CD45RA- CD27+_ParentalPercentage	0.0125447	0.298134
rs17166496	G	CD4+CMCD45RA-CD27+_LMI2_parentPerc__Index22	CD4+ CM CD45RA- CD27+_ParentalPercentage	0.0148644	0.312009
rs62447205	A	CD4+CMCD45RA-CD27+_LMI2_parentPerc__Index22	CD4+ CM CD45RA- CD27+_ParentalPercentage	-0.0129713	0.369624
rs4849135	G	CD4+CMCD45RA-CD27+_LMI2_parentPerc__Index22	CD4+ CM CD45RA- CD27+_ParentalPercentage	-0.012909	0.370947
rs1893217	G	CD4+CMCD45RA-CD27+_LMI2_parentPerc__Index22	CD4+ CM CD45RA- CD27+_ParentalPercentage	0.0142441	0.372931
rs10786436	T	CD4+CMCD45RA-CD27+_LMI2_parentPerc__Index22	CD4+ CM CD45RA- CD27+_ParentalPercentage	-0.012543	0.381754
rs1983853	C	CD4+CMCD45RA-CD27+_LMI2_parentPerc__Index22	CD4+ CM CD45RA- CD27+_ParentalPercentage	-0.0214848	0.387384
rs12927355	C	CD4+CMCD45RA-CD27+_LMI2_parentPerc__Index22	CD4+ CM CD45RA- CD27+_ParentalPercentage	0.010688	0.438048
rs10137082	C	CD4+CMCD45RA-CD27+_LMI2_parentPerc__Index22	CD4+ CM CD45RA- CD27+_ParentalPercentage	-0.00977441	0.506981
rs2281808	C	CD4+CMCD45RA-CD27+_LMI2_parentPerc__Index22	CD4+ CM CD45RA- CD27+_ParentalPercentage	0.00918899	0.507232
rs10795791	G	CD4+CMCD45RA-CD27+_LMI2_parentPerc__Index22	CD4+ CM CD45RA- CD27+_ParentalPercentage	0.00878262	0.515572
rs2304256	C	CD4+CMCD45RA-CD27+_LMI2_parentPerc__Index22	CD4+ CM CD45RA- CD27+_ParentalPercentage	-0.0092013	0.532211
rs11954020	G	CD4+CMCD45RA-CD27+_LMI2_parentPerc__Index22	CD4+ CM CD45RA- CD27+_ParentalPercentage	-0.00772203	0.550505
rs2290400	C	CD4+CMCD45RA-CD27+_LMI2_parentPerc__Index22	CD4+ CM CD45RA- CD27+_ParentalPercentage	0.00792546	0.567609
rs4763879	A	CD4+CMCD45RA-CD27+_LMI2_parentPerc__Index22	CD4+ CM CD45RA- CD27+_ParentalPercentage	-0.0072156	0.569514
rs16956936	C	CD4+CMCD45RA-CD27+_LMI2_parentPerc__Index22	CD4+ CM CD45RA- CD27+_ParentalPercentage	-0.0101653	0.622678
rs1615504	T	CD4+CMCD45RA-CD27+_LMI2_parentPerc__Index22	CD4+ CM CD45RA- CD27+_ParentalPercentage	-0.00673775	0.632918
rs1990760	T	CD4+CMCD45RA-CD27+_LMI2_parentPerc__Index22	CD4+ CM CD45RA- CD27+_ParentalPercentage	-0.00633388	0.643567
rs3825932	T	CD4+CMCD45RA-CD27+_LMI2_parentPerc__Index22	CD4+ CM CD45RA- CD27+_ParentalPercentage	0.00539406	0.692028
rs425105	T	CD4+CMCD45RA-CD27+_LMI2_parentPerc__Index22	CD4+ CM CD45RA- CD27+_ParentalPercentage	-0.00725245	0.693387
rs516246	T	CD4+CMCD45RA-CD27+_LMI2_parentPerc__Index22	CD4+ CM CD45RA- CD27+_ParentalPercentage	0.0047851	0.700295
rs10509540	T	CD4+CMCD45RA-CD27+_LMI2_parentPerc__Index22	CD4+ CM CD45RA- CD27+_ParentalPercentage	-0.00506384	0.7082
rs6518350	A	CD4+CMCD45RA-CD27+_LMI2_parentPerc__Index22	CD4+ CM CD45RA- CD27+_ParentalPercentage	-0.00653316	0.722602
rs6547853	G	CD4+CMCD45RA-CD27+_LMI2_parentPerc__Index22	CD4+ CM CD45RA- CD27+_ParentalPercentage	-0.00425875	0.735367
rs550448	A	CD4+CMCD45RA-CD27+_LMI2_parentPerc__Index22	CD4+ CM CD45RA- CD27+_ParentalPercentage	0.00613632	0.763456
rs12679857	A	CD4+CMCD45RA-CD27+_LMI2_parentPerc__Index22	CD4+ CM CD45RA- CD27+_ParentalPercentage	0.00369848	0.790703
rs56994090	T	CD4+CMCD45RA-CD27+_LMI2_parentPerc__Index22	CD4+ CM CD45RA- CD27+_ParentalPercentage	-0.00375143	0.812377
rs9585056	C	CD4+CMCD45RA-CD27+_LMI2_parentPerc__Index22	CD4+ CM CD45RA- CD27+_ParentalPercentage	0.00363748	0.812955
rs924043	C	CD4+CMCD45RA-CD27+_LMI2_parentPerc__Index22	CD4+ CM CD45RA- CD27+_ParentalPercentage	-0.00426416	0.823106
rs72928038	A	CD4+CMCD45RA-CD27+_LMI2_parentPerc__Index22	CD4+ CM CD45RA- CD27+_ParentalPercentage	0.00388879	0.826928
rs7202877	G	CD4+CMCD45RA-CD27+_LMI2_parentPerc__Index22	CD4+ CM CD45RA- CD27+_ParentalPercentage	0.00385777	0.848146
rs7020673	G	CD4+CMCD45RA-CD27+_LMI2_parentPerc__Index22	CD4+ CM CD45RA- CD27+_ParentalPercentage	-0.00203294	0.874474
rs539514	T	CD4+CMCD45RA-CD27+_LMI2_parentPerc__Index22	CD4+ CM CD45RA- CD27+_ParentalPercentage	-0.00157798	0.902954
rs7804356	T	CD4+CMCD45RA-CD27+_LMI2_parentPerc__Index22	CD4+ CM CD45RA- CD27+_ParentalPercentage	-0.00182498	0.904438
rs4900384	G	CD4+CMCD45RA-CD27+_LMI2_parentPerc__Index22	CD4+ CM CD45RA- CD27+_ParentalPercentage	0.0014884	0.91801
rs2165738	C	CD4+CMCD45RA-CD27+_LMI2_parentPerc__Index22	CD4+ CM CD45RA- CD27+_ParentalPercentage	-0.00149123	0.924004
rs11203203	A	CD4+CMCD45RA-CD27+_LMI2_parentPerc__Index22	CD4+ CM CD45RA- CD27+_ParentalPercentage	0.000697886	0.957826
rs229533	C	CD4+CMCD45RA-CD27+_LMI2_parentPerc__Index22	CD4+ CM CD45RA- CD27+_ParentalPercentage	-0.000669245	0.960359
rs5753037	T	CD4+CMCD45RA-CD27+_LMI2_parentPerc__Index22	CD4+ CM CD45RA- CD27+_ParentalPercentage	-0.000613598	0.963502
rs9388489	G	CD4+CMCD45RA-CD27+_LMI2_parentPerc__Index22	CD4+ CM CD45RA- CD27+_ParentalPercentage	-0.000529985	0.966127
rs3087243	G	CD4+CMCD45RO+CD27+_LMI2_grandparentPerc__Index21	CD4+ CM CD45RO+ CD27+_GrandParentalPercentage	0.0263385	0.00279031
rs653178	C	CD4+CMCD45RO+CD27+_LMI2_grandparentPerc__Index21	CD4+ CM CD45RO+ CD27+_GrandParentalPercentage	0.0211599	0.00941427
rs3024505	G	CD4+CMCD45RO+CD27+_LMI2_grandparentPerc__Index21	CD4+ CM CD45RO+ CD27+_GrandParentalPercentage	-0.0291851	0.0173307
rs9272346	G	CD4+CMCD45RO+CD27+_LMI2_grandparentPerc__Index21	CD4+ CM CD45RO+ CD27+_GrandParentalPercentage	0.0266232	0.0206826
rs1465788	C	CD4+CMCD45RO+CD27+_LMI2_grandparentPerc__Index21	CD4+ CM CD45RO+ CD27+_GrandParentalPercentage	-0.0193965	0.0478986
rs4505848	G	CD4+CMCD45RO+CD27+_LMI2_grandparentPerc__Index21	CD4+ CM CD45RO+ CD27+_GrandParentalPercentage	0.0143551	0.0848642
rs6691977	C	CD4+CMCD45RO+CD27+_LMI2_grandparentPerc__Index21	CD4+ CM CD45RO+ CD27+_GrandParentalPercentage	-0.0160591	0.123609
rs10509540	T	CD4+CMCD45RO+CD27+_LMI2_grandparentPerc__Index21	CD4+ CM CD45RO+ CD27+_GrandParentalPercentage	-0.0135977	0.127989
rs9388489	G	CD4+CMCD45RO+CD27+_LMI2_grandparentPerc__Index21	CD4+ CM CD45RO+ CD27+_GrandParentalPercentage	-0.0122523	0.137049
rs13415583	T	CD4+CMCD45RO+CD27+_LMI2_grandparentPerc__Index21	CD4+ CM CD45RO+ CD27+_GrandParentalPercentage	-0.0143438	0.144113
rs2292239	T	CD4+CMCD45RO+CD27+_LMI2_grandparentPerc__Index21	CD4+ CM CD45RO+ CD27+_GrandParentalPercentage	-0.0120928	0.160361
rs5753037	T	CD4+CMCD45RO+CD27+_LMI2_grandparentPerc__Index21	CD4+ CM CD45RO+ CD27+_GrandParentalPercentage	-0.0117258	0.185618
rs4788084	C	CD4+CMCD45RO+CD27+_LMI2_grandparentPerc__Index21	CD4+ CM CD45RO+ CD27+_GrandParentalPercentage	0.0114543	0.186364
rs11203203	A	CD4+CMCD45RO+CD27+_LMI2_grandparentPerc__Index21	CD4+ CM CD45RO+ CD27+_GrandParentalPercentage	0.0106024	0.224103
rs3825932	T	CD4+CMCD45RO+CD27+_LMI2_grandparentPerc__Index21	CD4+ CM CD45RO+ CD27+_GrandParentalPercentage	0.0108421	0.228398
rs924043	C	CD4+CMCD45RO+CD27+_LMI2_grandparentPerc__Index21	CD4+ CM CD45RO+ CD27+_GrandParentalPercentage	0.0144803	0.250788
rs10795791	G	CD4+CMCD45RO+CD27+_LMI2_grandparentPerc__Index21	CD4+ CM CD45RO+ CD27+_GrandParentalPercentage	-0.00994302	0.265726
rs2476601	A	CD4+CMCD45RO+CD27+_LMI2_grandparentPerc__Index21	CD4+ CM CD45RO+ CD27+_GrandParentalPercentage	0.0120073	0.272588
rs2165738	C	CD4+CMCD45RO+CD27+_LMI2_grandparentPerc__Index21	CD4+ CM CD45RO+ CD27+_GrandParentalPercentage	-0.0108539	0.293658
rs2304256	C	CD4+CMCD45RO+CD27+_LMI2_grandparentPerc__Index21	CD4+ CM CD45RO+ CD27+_GrandParentalPercentage	-0.0101352	0.298277
rs10137082	C	CD4+CMCD45RO+CD27+_LMI2_grandparentPerc__Index21	CD4+ CM CD45RO+ CD27+_GrandParentalPercentage	-0.0101301	0.298548
rs229533	C	CD4+CMCD45RO+CD27+_LMI2_grandparentPerc__Index21	CD4+ CM CD45RO+ CD27+_GrandParentalPercentage	-0.00854125	0.33745
rs516246	T	CD4+CMCD45RO+CD27+_LMI2_grandparentPerc__Index21	CD4+ CM CD45RO+ CD27+_GrandParentalPercentage	0.00766663	0.351151
rs1052553	A	CD4+CMCD45RO+CD27+_LMI2_grandparentPerc__Index21	CD4+ CM CD45RO+ CD27+_GrandParentalPercentage	0.00950742	0.361666
rs12679857	A	CD4+CMCD45RO+CD27+_LMI2_grandparentPerc__Index21	CD4+ CM CD45RO+ CD27+_GrandParentalPercentage	0.00760648	0.409324
rs11574435	C	CD4+CMCD45RO+CD27+_LMI2_grandparentPerc__Index21	CD4+ CM CD45RO+ CD27+_GrandParentalPercentage	-0.0128417	0.434503
rs689	T	CD4+CMCD45RO+CD27+_LMI2_grandparentPerc__Index21	CD4+ CM CD45RO+ CD27+_GrandParentalPercentage	-0.0088777	0.466766
rs1990760	T	CD4+CMCD45RO+CD27+_LMI2_grandparentPerc__Index21	CD4+ CM CD45RO+ CD27+_GrandParentalPercentage	0.00650252	0.47288
rs6518350	A	CD4+CMCD45RO+CD27+_LMI2_grandparentPerc__Index21	CD4+ CM CD45RO+ CD27+_GrandParentalPercentage	0.00839072	0.490857
rs6547853	G	CD4+CMCD45RO+CD27+_LMI2_grandparentPerc__Index21	CD4+ CM CD45RO+ CD27+_GrandParentalPercentage	-0.00540189	0.517104
rs4763879	A	CD4+CMCD45RO+CD27+_LMI2_grandparentPerc__Index21	CD4+ CM CD45RO+ CD27+_GrandParentalPercentage	-0.00509232	0.544286
rs947474	A	CD4+CMCD45RO+CD27+_LMI2_grandparentPerc__Index21	CD4+ CM CD45RO+ CD27+_GrandParentalPercentage	0.00607047	0.549913
rs425105	T	CD4+CMCD45RO+CD27+_LMI2_grandparentPerc__Index21	CD4+ CM CD45RO+ CD27+_GrandParentalPercentage	0.00718847	0.554913
rs2611215	A	CD4+CMCD45RO+CD27+_LMI2_grandparentPerc__Index21	CD4+ CM CD45RO+ CD27+_GrandParentalPercentage	0.00621247	0.558285
rs10517086	A	CD4+CMCD45RO+CD27+_LMI2_grandparentPerc__Index21	CD4+ CM CD45RO+ CD27+_GrandParentalPercentage	0.00487421	0.585617
rs1983853	C	CD4+CMCD45RO+CD27+_LMI2_grandparentPerc__Index21	CD4+ CM CD45RO+ CD27+_GrandParentalPercentage	0.0088959	0.588989
rs478222	A	CD4+CMCD45RO+CD27+_LMI2_grandparentPerc__Index21	CD4+ CM CD45RO+ CD27+_GrandParentalPercentage	-0.00414006	0.604354
rs12927355	C	CD4+CMCD45RO+CD27+_LMI2_grandparentPerc__Index21	CD4+ CM CD45RO+ CD27+_GrandParentalPercentage	0.0046677	0.609101
rs56994090	T	CD4+CMCD45RO+CD27+_LMI2_grandparentPerc__Index21	CD4+ CM CD45RO+ CD27+_GrandParentalPercentage	-0.00534286	0.609523
rs4849135	G	CD4+CMCD45RO+CD27+_LMI2_grandparentPerc__Index21	CD4+ CM CD45RO+ CD27+_GrandParentalPercentage	-0.0048144	0.614483
rs2281808	C	CD4+CMCD45RO+CD27+_LMI2_grandparentPerc__Index21	CD4+ CM CD45RO+ CD27+_GrandParentalPercentage	0.00445116	0.627607
rs1534422	G	CD4+CMCD45RO+CD27+_LMI2_grandparentPerc__Index21	CD4+ CM CD45RO+ CD27+_GrandParentalPercentage	0.00442705	0.634441
rs17166496	G	CD4+CMCD45RO+CD27+_LMI2_grandparentPerc__Index21	CD4+ CM CD45RO+ CD27+_GrandParentalPercentage	0.00431026	0.658214
rs193778	G	CD4+CMCD45RO+CD27+_LMI2_grandparentPerc__Index21	CD4+ CM CD45RO+ CD27+_GrandParentalPercentage	-0.00367028	0.694771
rs1615504	T	CD4+CMCD45RO+CD27+_LMI2_grandparentPerc__Index21	CD4+ CM CD45RO+ CD27+_GrandParentalPercentage	-0.0034762	0.709763
rs2290400	C	CD4+CMCD45RO+CD27+_LMI2_grandparentPerc__Index21	CD4+ CM CD45RO+ CD27+_GrandParentalPercentage	-0.00328581	0.720453
rs16956936	C	CD4+CMCD45RO+CD27+_LMI2_grandparentPerc__Index21	CD4+ CM CD45RO+ CD27+_GrandParentalPercentage	-0.00446957	0.743862
rs10786436	T	CD4+CMCD45RO+CD27+_LMI2_grandparentPerc__Index21	CD4+ CM CD45RO+ CD27+_GrandParentalPercentage	-0.00310311	0.743974
rs72727394	T	CD4+CMCD45RO+CD27+_LMI2_grandparentPerc__Index21	CD4+ CM CD45RO+ CD27+_GrandParentalPercentage	-0.00325393	0.753721
rs62447205	A	CD4+CMCD45RO+CD27+_LMI2_grandparentPerc__Index21	CD4+ CM CD45RO+ CD27+_GrandParentalPercentage	-0.00277209	0.772305
rs72928038	A	CD4+CMCD45RO+CD27+_LMI2_grandparentPerc__Index21	CD4+ CM CD45RO+ CD27+_GrandParentalPercentage	0.00321928	0.784539
rs1893217	G	CD4+CMCD45RO+CD27+_LMI2_grandparentPerc__Index21	CD4+ CM CD45RO+ CD27+_GrandParentalPercentage	0.00277017	0.793702
rs9585056	C	CD4+CMCD45RO+CD27+_LMI2_grandparentPerc__Index21	CD4+ CM CD45RO+ CD27+_GrandParentalPercentage	-0.00245843	0.809123
rs2269241	C	CD4+CMCD45RO+CD27+_LMI2_grandparentPerc__Index21	CD4+ CM CD45RO+ CD27+_GrandParentalPercentage	-0.00287178	0.821611
rs7020673	G	CD4+CMCD45RO+CD27+_LMI2_grandparentPerc__Index21	CD4+ CM CD45RO+ CD27+_GrandParentalPercentage	-0.00178699	0.833855
rs11954020	G	CD4+CMCD45RO+CD27+_LMI2_grandparentPerc__Index21	CD4+ CM CD45RO+ CD27+_GrandParentalPercentage	0.00140112	0.870081
rs11258747	T	CD4+CMCD45RO+CD27+_LMI2_grandparentPerc__Index21	CD4+ CM CD45RO+ CD27+_GrandParentalPercentage	0.00150669	0.876426
rs4900384	G	CD4+CMCD45RO+CD27+_LMI2_grandparentPerc__Index21	CD4+ CM CD45RO+ CD27+_GrandParentalPercentage	-0.00145389	0.879275
rs539514	T	CD4+CMCD45RO+CD27+_LMI2_grandparentPerc__Index21	CD4+ CM CD45RO+ CD27+_GrandParentalPercentage	0.00101008	0.906153
rs7202877	G	CD4+CMCD45RO+CD27+_LMI2_grandparentPerc__Index21	CD4+ CM CD45RO+ CD27+_GrandParentalPercentage	-0.00139743	0.916559
rs12444268	A	CD4+CMCD45RO+CD27+_LMI2_grandparentPerc__Index21	CD4+ CM CD45RO+ CD27+_GrandParentalPercentage	0.0011325	0.920121
rs550448	A	CD4+CMCD45RO+CD27+_LMI2_grandparentPerc__Index21	CD4+ CM CD45RO+ CD27+_GrandParentalPercentage	0.00123435	0.92715
rs7804356	T	CD4+CMCD45RO+CD27+_LMI2_grandparentPerc__Index21	CD4+ CM CD45RO+ CD27+_GrandParentalPercentage	9.0922e-06	0.999279
rs3087243	G	CD4+CMCD45RO+CD27+_LMI2_parentPerc__Index22	CD4+ CM CD45RO+ CD27+_ParentalPercentage	0.0368586	0.00103284
rs13415583	T	CD4+CMCD45RO+CD27+_LMI2_parentPerc__Index22	CD4+ CM CD45RO+ CD27+_ParentalPercentage	-0.0332064	0.00776955
rs6691977	C	CD4+CMCD45RO+CD27+_LMI2_parentPerc__Index22	CD4+ CM CD45RO+ CD27+_ParentalPercentage	-0.0286571	0.0310766
rs1465788	C	CD4+CMCD45RO+CD27+_LMI2_parentPerc__Index22	CD4+ CM CD45RO+ CD27+_ParentalPercentage	-0.0231517	0.0648011
rs1052553	A	CD4+CMCD45RO+CD27+_LMI2_parentPerc__Index22	CD4+ CM CD45RO+ CD27+_ParentalPercentage	0.0242528	0.0677875
rs2611215	A	CD4+CMCD45RO+CD27+_LMI2_parentPerc__Index22	CD4+ CM CD45RO+ CD27+_ParentalPercentage	0.0240659	0.0749778
rs11258747	T	CD4+CMCD45RO+CD27+_LMI2_parentPerc__Index22	CD4+ CM CD45RO+ CD27+_ParentalPercentage	0.0211911	0.0858865
rs72727394	T	CD4+CMCD45RO+CD27+_LMI2_parentPerc__Index22	CD4+ CM CD45RO+ CD27+_ParentalPercentage	0.022502	0.0884683
rs9272346	G	CD4+CMCD45RO+CD27+_LMI2_parentPerc__Index22	CD4+ CM CD45RO+ CD27+_ParentalPercentage	0.0238313	0.10624
rs2292239	T	CD4+CMCD45RO+CD27+_LMI2_parentPerc__Index22	CD4+ CM CD45RO+ CD27+_ParentalPercentage	-0.0171406	0.11924
rs2269241	C	CD4+CMCD45RO+CD27+_LMI2_parentPerc__Index22	CD4+ CM CD45RO+ CD27+_ParentalPercentage	0.0249132	0.124805
rs653178	C	CD4+CMCD45RO+CD27+_LMI2_parentPerc__Index22	CD4+ CM CD45RO+ CD27+_ParentalPercentage	0.0157589	0.132291
rs4788084	C	CD4+CMCD45RO+CD27+_LMI2_parentPerc__Index22	CD4+ CM CD45RO+ CD27+_ParentalPercentage	0.0164558	0.137178
rs2476601	A	CD4+CMCD45RO+CD27+_LMI2_parentPerc__Index22	CD4+ CM CD45RO+ CD27+_ParentalPercentage	0.0207279	0.13785
rs4505848	G	CD4+CMCD45RO+CD27+_LMI2_parentPerc__Index22	CD4+ CM CD45RO+ CD27+_ParentalPercentage	0.0157282	0.139954
rs3024505	G	CD4+CMCD45RO+CD27+_LMI2_parentPerc__Index22	CD4+ CM CD45RO+ CD27+_ParentalPercentage	-0.0225841	0.151377
rs689	T	CD4+CMCD45RO+CD27+_LMI2_parentPerc__Index22	CD4+ CM CD45RO+ CD27+_ParentalPercentage	-0.0203884	0.190283
rs1534422	G	CD4+CMCD45RO+CD27+_LMI2_parentPerc__Index22	CD4+ CM CD45RO+ CD27+_ParentalPercentage	0.0139306	0.241015
rs947474	A	CD4+CMCD45RO+CD27+_LMI2_parentPerc__Index22	CD4+ CM CD45RO+ CD27+_ParentalPercentage	-0.0150413	0.245783
rs17166496	G	CD4+CMCD45RO+CD27+_LMI2_parentPerc__Index22	CD4+ CM CD45RO+ CD27+_ParentalPercentage	0.0133932	0.281519
rs193778	G	CD4+CMCD45RO+CD27+_LMI2_parentPerc__Index22	CD4+ CM CD45RO+ CD27+_ParentalPercentage	-0.0127876	0.284127
rs1893217	G	CD4+CMCD45RO+CD27+_LMI2_parentPerc__Index22	CD4+ CM CD45RO+ CD27+_ParentalPercentage	0.0128951	0.340317
rs2304256	C	CD4+CMCD45RO+CD27+_LMI2_parentPerc__Index22	CD4+ CM CD45RO+ CD27+_ParentalPercentage	-0.0117202	0.346707
rs516246	T	CD4+CMCD45RO+CD27+_LMI2_parentPerc__Index22	CD4+ CM CD45RO+ CD27+_ParentalPercentage	0.00969397	0.356265
rs12444268	A	CD4+CMCD45RO+CD27+_LMI2_parentPerc__Index22	CD4+ CM CD45RO+ CD27+_ParentalPercentage	-0.0125344	0.384675
rs11574435	C	CD4+CMCD45RO+CD27+_LMI2_parentPerc__Index22	CD4+ CM CD45RO+ CD27+_ParentalPercentage	0.0177399	0.398154
rs10786436	T	CD4+CMCD45RO+CD27+_LMI2_parentPerc__Index22	CD4+ CM CD45RO+ CD27+_ParentalPercentage	-0.0100842	0.405911
rs9388489	G	CD4+CMCD45RO+CD27+_LMI2_parentPerc__Index22	CD4+ CM CD45RO+ CD27+_ParentalPercentage	-0.0083224	0.430228
rs3825932	T	CD4+CMCD45RO+CD27+_LMI2_parentPerc__Index22	CD4+ CM CD45RO+ CD27+_ParentalPercentage	0.00858984	0.455703
rs1615504	T	CD4+CMCD45RO+CD27+_LMI2_parentPerc__Index22	CD4+ CM CD45RO+ CD27+_ParentalPercentage	-0.00825822	0.488838
rs10509540	T	CD4+CMCD45RO+CD27+_LMI2_parentPerc__Index22	CD4+ CM CD45RO+ CD27+_ParentalPercentage	-0.00776838	0.497181
rs12927355	C	CD4+CMCD45RO+CD27+_LMI2_parentPerc__Index22	CD4+ CM CD45RO+ CD27+_ParentalPercentage	0.00741172	0.525104
rs229533	C	CD4+CMCD45RO+CD27+_LMI2_parentPerc__Index22	CD4+ CM CD45RO+ CD27+_ParentalPercentage	-0.00704184	0.536286
rs10137082	C	CD4+CMCD45RO+CD27+_LMI2_parentPerc__Index22	CD4+ CM CD45RO+ CD27+_ParentalPercentage	-0.0076382	0.539977
rs1983853	C	CD4+CMCD45RO+CD27+_LMI2_parentPerc__Index22	CD4+ CM CD45RO+ CD27+_ParentalPercentage	-0.0126524	0.547581
rs12679857	A	CD4+CMCD45RO+CD27+_LMI2_parentPerc__Index22	CD4+ CM CD45RO+ CD27+_ParentalPercentage	0.00688607	0.559046
rs425105	T	CD4+CMCD45RO+CD27+_LMI2_parentPerc__Index22	CD4+ CM CD45RO+ CD27+_ParentalPercentage	-0.00876425	0.573251
rs10517086	A	CD4+CMCD45RO+CD27+_LMI2_parentPerc__Index22	CD4+ CM CD45RO+ CD27+_ParentalPercentage	-0.00638318	0.576353
rs550448	A	CD4+CMCD45RO+CD27+_LMI2_parentPerc__Index22	CD4+ CM CD45RO+ CD27+_ParentalPercentage	0.00919126	0.59408
rs924043	C	CD4+CMCD45RO+CD27+_LMI2_parentPerc__Index22	CD4+ CM CD45RO+ CD27+_ParentalPercentage	0.00796963	0.621328
rs4849135	G	CD4+CMCD45RO+CD27+_LMI2_parentPerc__Index22	CD4+ CM CD45RO+ CD27+_ParentalPercentage	-0.00568232	0.641802
rs10795791	G	CD4+CMCD45RO+CD27+_LMI2_parentPerc__Index22	CD4+ CM CD45RO+ CD27+_ParentalPercentage	-0.00525353	0.645811
rs62447205	A	CD4+CMCD45RO+CD27+_LMI2_parentPerc__Index22	CD4+ CM CD45RO+ CD27+_ParentalPercentage	-0.00535298	0.661891
rs6518350	A	CD4+CMCD45RO+CD27+_LMI2_parentPerc__Index22	CD4+ CM CD45RO+ CD27+_ParentalPercentage	0.00662439	0.670489
rs72928038	A	CD4+CMCD45RO+CD27+_LMI2_parentPerc__Index22	CD4+ CM CD45RO+ CD27+_ParentalPercentage	0.00630407	0.675208
rs11203203	A	CD4+CMCD45RO+CD27+_LMI2_parentPerc__Index22	CD4+ CM CD45RO+ CD27+_ParentalPercentage	-0.0046698	0.675699
rs2290400	C	CD4+CMCD45RO+CD27+_LMI2_parentPerc__Index22	CD4+ CM CD45RO+ CD27+_ParentalPercentage	0.0048766	0.677685
rs2165738	C	CD4+CMCD45RO+CD27+_LMI2_parentPerc__Index22	CD4+ CM CD45RO+ CD27+_ParentalPercentage	-0.00458827	0.728616
rs6547853	G	CD4+CMCD45RO+CD27+_LMI2_parentPerc__Index22	CD4+ CM CD45RO+ CD27+_ParentalPercentage	0.00352657	0.74078
rs16956936	C	CD4+CMCD45RO+CD27+_LMI2_parentPerc__Index22	CD4+ CM CD45RO+ CD27+_ParentalPercentage	-0.00512977	0.769182
rs7202877	G	CD4+CMCD45RO+CD27+_LMI2_parentPerc__Index22	CD4+ CM CD45RO+ CD27+_ParentalPercentage	-0.00461427	0.786599
rs478222	A	CD4+CMCD45RO+CD27+_LMI2_parentPerc__Index22	CD4+ CM CD45RO+ CD27+_ParentalPercentage	0.00276165	0.78685
rs4763879	A	CD4+CMCD45RO+CD27+_LMI2_parentPerc__Index22	CD4+ CM CD45RO+ CD27+_ParentalPercentage	-0.00287008	0.789219
rs5753037	T	CD4+CMCD45RO+CD27+_LMI2_parentPerc__Index22	CD4+ CM CD45RO+ CD27+_ParentalPercentage	-0.00289566	0.79852
rs7020673	G	CD4+CMCD45RO+CD27+_LMI2_parentPerc__Index22	CD4+ CM CD45RO+ CD27+_ParentalPercentage	-0.00277521	0.798783
rs7804356	T	CD4+CMCD45RO+CD27+_LMI2_parentPerc__Index22	CD4+ CM CD45RO+ CD27+_ParentalPercentage	-0.00308687	0.810298
rs56994090	T	CD4+CMCD45RO+CD27+_LMI2_parentPerc__Index22	CD4+ CM CD45RO+ CD27+_ParentalPercentage	-0.00311959	0.815524
rs2281808	C	CD4+CMCD45RO+CD27+_LMI2_parentPerc__Index22	CD4+ CM CD45RO+ CD27+_ParentalPercentage	-0.00270953	0.817297
rs1990760	T	CD4+CMCD45RO+CD27+_LMI2_parentPerc__Index22	CD4+ CM CD45RO+ CD27+_ParentalPercentage	-0.00225826	0.845425
rs539514	T	CD4+CMCD45RO+CD27+_LMI2_parentPerc__Index22	CD4+ CM CD45RO+ CD27+_ParentalPercentage	-0.002045	0.851833
rs9585056	C	CD4+CMCD45RO+CD27+_LMI2_parentPerc__Index22	CD4+ CM CD45RO+ CD27+_ParentalPercentage	-0.00125323	0.92324
rs4900384	G	CD4+CMCD45RO+CD27+_LMI2_parentPerc__Index22	CD4+ CM CD45RO+ CD27+_ParentalPercentage	0.000454383	0.970369
rs11954020	G	CD4+CMCD45RO+CD27+_LMI2_parentPerc__Index22	CD4+ CM CD45RO+ CD27+_ParentalPercentage	-0.000109988	0.991984
rs10137082	C	CD4+EffCD45RA+CD27-_LMI2_grandparentPerc__Index21	CD4+ Eff CD45RA+ CD27-_GrandParentalPercentage	-0.00471474	0.003351
rs1983853	C	CD4+EffCD45RA+CD27-_LMI2_grandparentPerc__Index21	CD4+ Eff CD45RA+ CD27-_GrandParentalPercentage	-0.00548413	0.044388
rs2165738	C	CD4+EffCD45RA+CD27-_LMI2_grandparentPerc__Index21	CD4+ Eff CD45RA+ CD27-_GrandParentalPercentage	0.00343363	0.0451685
rs11574435	C	CD4+EffCD45RA+CD27-_LMI2_grandparentPerc__Index21	CD4+ Eff CD45RA+ CD27-_GrandParentalPercentage	0.00503662	0.0646126
rs2281808	C	CD4+EffCD45RA+CD27-_LMI2_grandparentPerc__Index21	CD4+ Eff CD45RA+ CD27-_GrandParentalPercentage	0.00275617	0.070073
rs12927355	C	CD4+EffCD45RA+CD27-_LMI2_grandparentPerc__Index21	CD4+ Eff CD45RA+ CD27-_GrandParentalPercentage	-0.00254777	0.0925194
rs2269241	C	CD4+EffCD45RA+CD27-_LMI2_grandparentPerc__Index21	CD4+ Eff CD45RA+ CD27-_GrandParentalPercentage	0.00315242	0.13595
rs11954020	G	CD4+EffCD45RA+CD27-_LMI2_grandparentPerc__Index21	CD4+ Eff CD45RA+ CD27-_GrandParentalPercentage	0.00205989	0.147511
rs2611215	A	CD4+EffCD45RA+CD27-_LMI2_grandparentPerc__Index21	CD4+ Eff CD45RA+ CD27-_GrandParentalPercentage	-0.00249817	0.156416
rs229533	C	CD4+EffCD45RA+CD27-_LMI2_grandparentPerc__Index21	CD4+ Eff CD45RA+ CD27-_GrandParentalPercentage	0.00206362	0.16326
rs1465788	C	CD4+EffCD45RA+CD27-_LMI2_grandparentPerc__Index21	CD4+ Eff CD45RA+ CD27-_GrandParentalPercentage	0.00225292	0.168438
rs5753037	T	CD4+EffCD45RA+CD27-_LMI2_grandparentPerc__Index21	CD4+ Eff CD45RA+ CD27-_GrandParentalPercentage	0.00191314	0.194465
rs10795791	G	CD4+EffCD45RA+CD27-_LMI2_grandparentPerc__Index21	CD4+ Eff CD45RA+ CD27-_GrandParentalPercentage	-0.00189709	0.201787
rs7804356	T	CD4+EffCD45RA+CD27-_LMI2_grandparentPerc__Index21	CD4+ Eff CD45RA+ CD27-_GrandParentalPercentage	-0.00213257	0.202051
rs6518350	A	CD4+EffCD45RA+CD27-_LMI2_grandparentPerc__Index21	CD4+ Eff CD45RA+ CD27-_GrandParentalPercentage	0.00243677	0.228754
rs9272346	G	CD4+EffCD45RA+CD27-_LMI2_grandparentPerc__Index21	CD4+ Eff CD45RA+ CD27-_GrandParentalPercentage	-0.00217562	0.258279
rs72727394	T	CD4+EffCD45RA+CD27-_LMI2_grandparentPerc__Index21	CD4+ Eff CD45RA+ CD27-_GrandParentalPercentage	0.00190265	0.269708
rs689	T	CD4+EffCD45RA+CD27-_LMI2_grandparentPerc__Index21	CD4+ Eff CD45RA+ CD27-_GrandParentalPercentage	-0.0022163	0.274615
rs12679857	A	CD4+EffCD45RA+CD27-_LMI2_grandparentPerc__Index21	CD4+ Eff CD45RA+ CD27-_GrandParentalPercentage	-0.00166759	0.276817
rs1615504	T	CD4+EffCD45RA+CD27-_LMI2_grandparentPerc__Index21	CD4+ Eff CD45RA+ CD27-_GrandParentalPercentage	-0.00166278	0.284194
rs4900384	G	CD4+EffCD45RA+CD27-_LMI2_grandparentPerc__Index21	CD4+ Eff CD45RA+ CD27-_GrandParentalPercentage	-0.00169432	0.286898
rs539514	T	CD4+EffCD45RA+CD27-_LMI2_grandparentPerc__Index21	CD4+ Eff CD45RA+ CD27-_GrandParentalPercentage	0.00150854	0.289453
rs7202877	G	CD4+EffCD45RA+CD27-_LMI2_grandparentPerc__Index21	CD4+ Eff CD45RA+ CD27-_GrandParentalPercentage	-0.00230363	0.298782
rs10509540	T	CD4+EffCD45RA+CD27-_LMI2_grandparentPerc__Index21	CD4+ Eff CD45RA+ CD27-_GrandParentalPercentage	0.00146572	0.325026
rs4849135	G	CD4+EffCD45RA+CD27-_LMI2_grandparentPerc__Index21	CD4+ Eff CD45RA+ CD27-_GrandParentalPercentage	0.00153998	0.332623
rs516246	T	CD4+EffCD45RA+CD27-_LMI2_grandparentPerc__Index21	CD4+ Eff CD45RA+ CD27-_GrandParentalPercentage	-0.00129528	0.343898
rs11258747	T	CD4+EffCD45RA+CD27-_LMI2_grandparentPerc__Index21	CD4+ Eff CD45RA+ CD27-_GrandParentalPercentage	-0.00130634	0.417541
rs9388489	G	CD4+EffCD45RA+CD27-_LMI2_grandparentPerc__Index21	CD4+ Eff CD45RA+ CD27-_GrandParentalPercentage	0.00110314	0.422072
rs10517086	A	CD4+EffCD45RA+CD27-_LMI2_grandparentPerc__Index21	CD4+ Eff CD45RA+ CD27-_GrandParentalPercentage	-0.00108214	0.466935
rs2476601	A	CD4+EffCD45RA+CD27-_LMI2_grandparentPerc__Index21	CD4+ Eff CD45RA+ CD27-_GrandParentalPercentage	-0.00130374	0.474514
rs924043	C	CD4+EffCD45RA+CD27-_LMI2_grandparentPerc__Index21	CD4+ Eff CD45RA+ CD27-_GrandParentalPercentage	-0.00147025	0.483983
rs4788084	C	CD4+EffCD45RA+CD27-_LMI2_grandparentPerc__Index21	CD4+ Eff CD45RA+ CD27-_GrandParentalPercentage	0.00096237	0.505397
rs2292239	T	CD4+EffCD45RA+CD27-_LMI2_grandparentPerc__Index21	CD4+ Eff CD45RA+ CD27-_GrandParentalPercentage	0.000801862	0.576714
rs1990760	T	CD4+EffCD45RA+CD27-_LMI2_grandparentPerc__Index21	CD4+ Eff CD45RA+ CD27-_GrandParentalPercentage	0.000809847	0.591275
rs425105	T	CD4+EffCD45RA+CD27-_LMI2_grandparentPerc__Index21	CD4+ Eff CD45RA+ CD27-_GrandParentalPercentage	0.00108695	0.591709
rs72928038	A	CD4+EffCD45RA+CD27-_LMI2_grandparentPerc__Index21	CD4+ Eff CD45RA+ CD27-_GrandParentalPercentage	-0.00104768	0.592819
rs193778	G	CD4+EffCD45RA+CD27-_LMI2_grandparentPerc__Index21	CD4+ Eff CD45RA+ CD27-_GrandParentalPercentage	-0.000769319	0.621141
rs3087243	G	CD4+EffCD45RA+CD27-_LMI2_grandparentPerc__Index21	CD4+ Eff CD45RA+ CD27-_GrandParentalPercentage	-0.000727408	0.62345
rs62447205	A	CD4+EffCD45RA+CD27-_LMI2_grandparentPerc__Index21	CD4+ Eff CD45RA+ CD27-_GrandParentalPercentage	-0.000762677	0.632351
rs3825932	T	CD4+EffCD45RA+CD27-_LMI2_grandparentPerc__Index21	CD4+ Eff CD45RA+ CD27-_GrandParentalPercentage	0.000643541	0.667991
rs550448	A	CD4+EffCD45RA+CD27-_LMI2_grandparentPerc__Index21	CD4+ Eff CD45RA+ CD27-_GrandParentalPercentage	0.000922254	0.681414
rs6691977	C	CD4+EffCD45RA+CD27-_LMI2_grandparentPerc__Index21	CD4+ Eff CD45RA+ CD27-_GrandParentalPercentage	-0.000675767	0.697816
rs4505848	G	CD4+EffCD45RA+CD27-_LMI2_grandparentPerc__Index21	CD4+ Eff CD45RA+ CD27-_GrandParentalPercentage	0.000488554	0.725477
rs4763879	A	CD4+EffCD45RA+CD27-_LMI2_grandparentPerc__Index21	CD4+ Eff CD45RA+ CD27-_GrandParentalPercentage	0.000451494	0.746766
rs9585056	C	CD4+EffCD45RA+CD27-_LMI2_grandparentPerc__Index21	CD4+ Eff CD45RA+ CD27-_GrandParentalPercentage	0.000544382	0.747905
rs2304256	C	CD4+EffCD45RA+CD27-_LMI2_grandparentPerc__Index21	CD4+ Eff CD45RA+ CD27-_GrandParentalPercentage	-0.000479307	0.767845
rs947474	A	CD4+EffCD45RA+CD27-_LMI2_grandparentPerc__Index21	CD4+ Eff CD45RA+ CD27-_GrandParentalPercentage	-0.000488541	0.772572
rs11203203	A	CD4+EffCD45RA+CD27-_LMI2_grandparentPerc__Index21	CD4+ Eff CD45RA+ CD27-_GrandParentalPercentage	0.000419341	0.773032
rs6547853	G	CD4+EffCD45RA+CD27-_LMI2_grandparentPerc__Index21	CD4+ Eff CD45RA+ CD27-_GrandParentalPercentage	0.000390477	0.778523
rs56994090	T	CD4+EffCD45RA+CD27-_LMI2_grandparentPerc__Index21	CD4+ Eff CD45RA+ CD27-_GrandParentalPercentage	-0.000443316	0.799055
rs1893217	G	CD4+EffCD45RA+CD27-_LMI2_grandparentPerc__Index21	CD4+ Eff CD45RA+ CD27-_GrandParentalPercentage	0.000412063	0.815204
rs7020673	G	CD4+EffCD45RA+CD27-_LMI2_grandparentPerc__Index21	CD4+ Eff CD45RA+ CD27-_GrandParentalPercentage	-0.000324945	0.818729
rs3024505	G	CD4+EffCD45RA+CD27-_LMI2_grandparentPerc__Index21	CD4+ Eff CD45RA+ CD27-_GrandParentalPercentage	0.000466975	0.820249
rs16956936	C	CD4+EffCD45RA+CD27-_LMI2_grandparentPerc__Index21	CD4+ Eff CD45RA+ CD27-_GrandParentalPercentage	0.000500871	0.825881
rs478222	A	CD4+EffCD45RA+CD27-_LMI2_grandparentPerc__Index21	CD4+ Eff CD45RA+ CD27-_GrandParentalPercentage	0.000270016	0.839141
rs1534422	G	CD4+EffCD45RA+CD27-_LMI2_grandparentPerc__Index21	CD4+ Eff CD45RA+ CD27-_GrandParentalPercentage	0.000275277	0.859035
rs13415583	T	CD4+EffCD45RA+CD27-_LMI2_grandparentPerc__Index21	CD4+ Eff CD45RA+ CD27-_GrandParentalPercentage	0.000287601	0.860671
rs12444268	A	CD4+EffCD45RA+CD27-_LMI2_grandparentPerc__Index21	CD4+ Eff CD45RA+ CD27-_GrandParentalPercentage	0.0002664	0.887288
rs653178	C	CD4+EffCD45RA+CD27-_LMI2_grandparentPerc__Index21	CD4+ Eff CD45RA+ CD27-_GrandParentalPercentage	-0.000187747	0.890786
rs17166496	G	CD4+EffCD45RA+CD27-_LMI2_grandparentPerc__Index21	CD4+ Eff CD45RA+ CD27-_GrandParentalPercentage	-0.00019689	0.903383
rs1052553	A	CD4+EffCD45RA+CD27-_LMI2_grandparentPerc__Index21	CD4+ Eff CD45RA+ CD27-_GrandParentalPercentage	-0.000186169	0.914617
rs10786436	T	CD4+EffCD45RA+CD27-_LMI2_grandparentPerc__Index21	CD4+ Eff CD45RA+ CD27-_GrandParentalPercentage	-0.000167009	0.9159
rs2290400	C	CD4+EffCD45RA+CD27-_LMI2_grandparentPerc__Index21	CD4+ Eff CD45RA+ CD27-_GrandParentalPercentage	-0.000106628	0.944382
rs10137082	C	CD4+EffCD45RA+CD27-_LMI2_parentPerc__Index22	CD4+ Eff CD45RA+ CD27-_ParentalPercentage	-0.00883194	0.00669156
rs11574435	C	CD4+EffCD45RA+CD27-_LMI2_parentPerc__Index22	CD4+ Eff CD45RA+ CD27-_ParentalPercentage	0.011987	0.0294754
rs1983853	C	CD4+EffCD45RA+CD27-_LMI2_parentPerc__Index22	CD4+ Eff CD45RA+ CD27-_ParentalPercentage	-0.0111834	0.0427344
rs2165738	C	CD4+EffCD45RA+CD27-_LMI2_parentPerc__Index22	CD4+ Eff CD45RA+ CD27-_ParentalPercentage	0.00659176	0.0574894
rs2269241	C	CD4+EffCD45RA+CD27-_LMI2_parentPerc__Index22	CD4+ Eff CD45RA+ CD27-_ParentalPercentage	0.00720714	0.0917972
rs2281808	C	CD4+EffCD45RA+CD27-_LMI2_parentPerc__Index22	CD4+ Eff CD45RA+ CD27-_ParentalPercentage	0.00484819	0.115664
rs12927355	C	CD4+EffCD45RA+CD27-_LMI2_parentPerc__Index22	CD4+ Eff CD45RA+ CD27-_ParentalPercentage	-0.00478532	0.118563
rs5753037	T	CD4+EffCD45RA+CD27-_LMI2_parentPerc__Index22	CD4+ Eff CD45RA+ CD27-_ParentalPercentage	0.0044565	0.134989
rs229533	C	CD4+EffCD45RA+CD27-_LMI2_parentPerc__Index22	CD4+ Eff CD45RA+ CD27-_ParentalPercentage	0.00436453	0.144943
rs1465788	C	CD4+EffCD45RA+CD27-_LMI2_parentPerc__Index22	CD4+ Eff CD45RA+ CD27-_ParentalPercentage	0.00469506	0.15599
rs72727394	T	CD4+EffCD45RA+CD27-_LMI2_parentPerc__Index22	CD4+ Eff CD45RA+ CD27-_ParentalPercentage	0.00474188	0.173659
rs11954020	G	CD4+EffCD45RA+CD27-_LMI2_parentPerc__Index22	CD4+ Eff CD45RA+ CD27-_ParentalPercentage	0.00390101	0.175358
rs2611215	A	CD4+EffCD45RA+CD27-_LMI2_parentPerc__Index22	CD4+ Eff CD45RA+ CD27-_ParentalPercentage	-0.00476665	0.181522
rs7804356	T	CD4+EffCD45RA+CD27-_LMI2_parentPerc__Index22	CD4+ Eff CD45RA+ CD27-_ParentalPercentage	-0.00430738	0.202854
rs1615504	T	CD4+EffCD45RA+CD27-_LMI2_parentPerc__Index22	CD4+ Eff CD45RA+ CD27-_ParentalPercentage	-0.00392024	0.211855
rs6518350	A	CD4+EffCD45RA+CD27-_LMI2_parentPerc__Index22	CD4+ Eff CD45RA+ CD27-_ParentalPercentage	0.00506128	0.216604
rs9272346	G	CD4+EffCD45RA+CD27-_LMI2_parentPerc__Index22	CD4+ Eff CD45RA+ CD27-_ParentalPercentage	-0.00459902	0.237524
rs10509540	T	CD4+EffCD45RA+CD27-_LMI2_parentPerc__Index22	CD4+ Eff CD45RA+ CD27-_ParentalPercentage	0.0033431	0.267099
rs10795791	G	CD4+EffCD45RA+CD27-_LMI2_parentPerc__Index22	CD4+ Eff CD45RA+ CD27-_ParentalPercentage	-0.00329157	0.273949
rs12679857	A	CD4+EffCD45RA+CD27-_LMI2_parentPerc__Index22	CD4+ Eff CD45RA+ CD27-_ParentalPercentage	-0.00327486	0.291244
rs4900384	G	CD4+EffCD45RA+CD27-_LMI2_parentPerc__Index22	CD4+ Eff CD45RA+ CD27-_ParentalPercentage	-0.00334801	0.29836
rs689	T	CD4+EffCD45RA+CD27-_LMI2_parentPerc__Index22	CD4+ Eff CD45RA+ CD27-_ParentalPercentage	-0.00414934	0.312184
rs539514	T	CD4+EffCD45RA+CD27-_LMI2_parentPerc__Index22	CD4+ Eff CD45RA+ CD27-_ParentalPercentage	0.00290554	0.313338
rs7202877	G	CD4+EffCD45RA+CD27-_LMI2_parentPerc__Index22	CD4+ Eff CD45RA+ CD27-_ParentalPercentage	-0.00435594	0.331621
rs4849135	G	CD4+EffCD45RA+CD27-_LMI2_parentPerc__Index22	CD4+ Eff CD45RA+ CD27-_ParentalPercentage	0.00311199	0.333246
rs10517086	A	CD4+EffCD45RA+CD27-_LMI2_parentPerc__Index22	CD4+ Eff CD45RA+ CD27-_ParentalPercentage	-0.00280335	0.351454
rs516246	T	CD4+EffCD45RA+CD27-_LMI2_parentPerc__Index22	CD4+ Eff CD45RA+ CD27-_ParentalPercentage	-0.00251293	0.364175
rs924043	C	CD4+EffCD45RA+CD27-_LMI2_parentPerc__Index22	CD4+ Eff CD45RA+ CD27-_ParentalPercentage	-0.00383906	0.366213
rs9388489	G	CD4+EffCD45RA+CD27-_LMI2_parentPerc__Index22	CD4+ Eff CD45RA+ CD27-_ParentalPercentage	0.00244083	0.379918
rs4788084	C	CD4+EffCD45RA+CD27-_LMI2_parentPerc__Index22	CD4+ Eff CD45RA+ CD27-_ParentalPercentage	0.00242831	0.406082
rs11258747	T	CD4+EffCD45RA+CD27-_LMI2_parentPerc__Index22	CD4+ Eff CD45RA+ CD27-_ParentalPercentage	-0.00266915	0.412981
rs3087243	G	CD4+EffCD45RA+CD27-_LMI2_parentPerc__Index22	CD4+ Eff CD45RA+ CD27-_ParentalPercentage	-0.00186633	0.533501
rs62447205	A	CD4+EffCD45RA+CD27-_LMI2_parentPerc__Index22	CD4+ Eff CD45RA+ CD27-_ParentalPercentage	-0.00198023	0.539201
rs2476601	A	CD4+EffCD45RA+CD27-_LMI2_parentPerc__Index22	CD4+ Eff CD45RA+ CD27-_ParentalPercentage	-0.002202	0.550608
rs193778	G	CD4+EffCD45RA+CD27-_LMI2_parentPerc__Index22	CD4+ Eff CD45RA+ CD27-_ParentalPercentage	-0.00184298	0.558401
rs947474	A	CD4+EffCD45RA+CD27-_LMI2_parentPerc__Index22	CD4+ Eff CD45RA+ CD27-_ParentalPercentage	-0.00179394	0.599846
rs550448	A	CD4+EffCD45RA+CD27-_LMI2_parentPerc__Index22	CD4+ Eff CD45RA+ CD27-_ParentalPercentage	0.00222905	0.623829
rs1990760	T	CD4+EffCD45RA+CD27-_LMI2_parentPerc__Index22	CD4+ Eff CD45RA+ CD27-_ParentalPercentage	0.00144419	0.636047
rs6691977	C	CD4+EffCD45RA+CD27-_LMI2_parentPerc__Index22	CD4+ Eff CD45RA+ CD27-_ParentalPercentage	-0.0016564	0.638075
rs6547853	G	CD4+EffCD45RA+CD27-_LMI2_parentPerc__Index22	CD4+ Eff CD45RA+ CD27-_ParentalPercentage	0.00125124	0.655985
rs2292239	T	CD4+EffCD45RA+CD27-_LMI2_parentPerc__Index22	CD4+ Eff CD45RA+ CD27-_ParentalPercentage	0.0012658	0.663261
rs9585056	C	CD4+EffCD45RA+CD27-_LMI2_parentPerc__Index22	CD4+ Eff CD45RA+ CD27-_ParentalPercentage	0.0014006	0.682752
rs3024505	G	CD4+EffCD45RA+CD27-_LMI2_parentPerc__Index22	CD4+ Eff CD45RA+ CD27-_ParentalPercentage	0.00166664	0.688531
rs72928038	A	CD4+EffCD45RA+CD27-_LMI2_parentPerc__Index22	CD4+ Eff CD45RA+ CD27-_ParentalPercentage	-0.00156158	0.693686
rs4763879	A	CD4+EffCD45RA+CD27-_LMI2_parentPerc__Index22	CD4+ Eff CD45RA+ CD27-_ParentalPercentage	0.00109544	0.698592
[truncated: 14,949 more rows]

## Sheet: S4
Supplementary file 4: Summary statistics of GWAS loci in cytokine QTLs profile
SNP	risk_allele	cytokine	beta_300DM	p_300DM
rs924043	C	LPS1ng_PBMC_24h_MCP-1	-0.651976	9.06545e-05
rs2269241	C	LPS100ng_PBMC_24h_IL-1RA	0.296033	0.000342089
rs56994090	T	C,Albicansconidia_PBMC_24h_IL-6	-0.310281	0.000401173
rs72727394	T	S,Aureus_PBMC_24h_IL-1b	0.196071	0.000474846
rs4763879	A	C,Albicansconidia_PBMC_7d_IL-17	0.506968	0.000624546
rs10137082	C	MTB_PBMC_24h_IL-6	-0.520755	0.00100977
rs72928038	A	C,Albicansconidia_PBMC_7d_IL-22	0.741573	0.00125916
rs9585056	C	BorreliaMix_PBMC_24h_IL-6	-0.484602	0.00137342
rs10137082	C	MTB_PBMC_24h_IL-1b	-0.512675	0.00150455
rs2165738	C	C,Albicansconidia_PBMC_24h_IL-10	-0.38879	0.00153638
rs72928038	A	C,Albicanshyphae_PBMC_7d_IL-17	0.705939	0.00159322
rs10517086	A	C,Albicansconidia_PBMC_24h_IL-10	-0.328303	0.00189952
rs56994090	T	S,Aureus_PBMC_24h_IL-6	-0.292584	0.00270508
rs10509540	T	S,Aureus_PBMC_24h_IL-1RA	0.178997	0.00278369
rs17166496	G	LPS1ng_PBMC_24h_MCP-1	-0.373698	0.00319146
rs10137082	C	P3C_PBMC_24h_TNF-a	-0.312558	0.00353686
rs72928038	A	C,Albicanshyphae_PBMC_7d_IL-22	0.618957	0.00403116
rs3087243	G	LPS1ng_PBMC_24h_IL-10	-0.421129	0.00404847
rs2165738	C	LPS1ng_PBMC_24h_IL-8	-0.325402	0.00415988
rs72727394	T	LPS100ng_PBMC_24h_IL-1b	0.342381	0.00416596
rs2292239	T	P3C_PBMC_24h_IL-10	-0.246626	0.00424877
rs10137082	C	BorreliaMix_PBMC_24h_IL-1b	-0.361327	0.00488298
rs56994090	T	S,Aureus_PBMC_24h_IL-10	-0.397851	0.00491846
rs9585056	C	C,Albicansconidia_PBMC_24h_IL-8	-0.237623	0.0051476
rs653178	C	S,Pneumoniae_PBMC_24h_IL-6	-0.350454	0.0051502
rs653178	C	MTB_PBMC_24h_IL-1b	-0.380302	0.0051544
rs1465788	C	C,Albicansconidia_PBMC_24h_IL-10	-0.324161	0.0052218
rs72928038	A	LPS100ng_PBMC_24h_IL-8	-0.171769	0.00536881
rs11954020	G	S,Aureus_PBMC_24h_IL-8	-0.2054	0.00547038
rs10795791	G	BorreliaMix_PBMC_24h_IL-6	0.373594	0.00559366
rs17166496	G	LPS100ng_PBMC_24h_MCP-1	-0.413003	0.00568154
rs539514	T	C,Albicanshyphae_PBMC_24h_IL-6	0.287923	0.0057715
rs550448	A	C,Albicanshyphae_PBMC_24h_IL-6	0.446526	0.00578434
rs56994090	T	C,Albicansconidia_PBMC_24h_IL-8	-0.249308	0.00582222
rs653178	C	BorreliaMix_PBMC_24h_IL-6	-0.330698	0.00658267
rs72727394	T	C,Albicansconidia_PBMC_24h_IL-1b	0.229234	0.00669675
rs10795791	G	MTB_PBMC_24h_IL-1b	0.408542	0.00673594
rs62447205	A	C,Albicanshyphae_PBMC_24h_TNF-a	0.330743	0.00687321
rs947474	A	S,Aureus_PBMC_24h_TNF-a	-0.385093	0.007315
rs10795791	G	C,Burnetiiserum_PBMC_24h_TNF-a	0.239995	0.00769142
rs10795791	G	C,Albicanshyphae_PBMC_7d_IFNy	-0.441271	0.00778026
rs653178	C	BorreliaMix_PBMC_24h_IL-1b	-0.284828	0.00828153
rs4505848	G	S,Aureus_PBMC_24h_IL-6	0.197829	0.00830789
rs10795791	G	C,Albicansconidia_PBMC_7d_IL-17	-0.417417	0.00850426
rs1465788	C	LPS100ng_PBMC_24h_IL-10	-0.26598	0.00859313
rs539514	T	C,Burnetiiserum_PBMC_24h_TNF-a	0.227335	0.0087825
rs550448	A	LPS100ng_PBMC_24h_MCP-1	-0.54382	0.0088332
rs10137082	C	C,Albicanshyphae_PBMC_24h_IL-1b	-0.214027	0.00884122
rs10137082	C	C,Albicanshyphae_PBMC_24h_TNF-a	-0.324924	0.00896148
rs56994090	T	C,Albicansconidia_PBMC_24h_TNF-a	0.271853	0.00972033
rs3024505	G	P3C_PBMC_24h_IL-1b	0.233227	0.0101024
rs2165738	C	LPS100ng_PBMC_24h_IL-8	-0.138922	0.0102836
rs539514	T	C,Albicansconidia_PBMC_24h_IL-6	0.182071	0.0102878
rs425105	T	C,Albicansconidia_PBMC_7d_IL-22	0.615832	0.0102972
rs3087243	G	S,Aureus_PBMC_24h_IL-10	-0.301999	0.0104272
rs229533	C	C,Albicansconidia_PBMC_24h_IL-10	-0.266931	0.011075
rs2292239	T	S,Aureus_PBMC_24h_IL-10	-0.283899	0.0120535
rs2269241	C	P3C_PBMC_24h_IL-1RA	0.199796	0.0123146
rs2269241	C	LPS100ng_PBMC_24h_IL-8	0.168806	0.0124244
rs10137082	C	C,Albicanshyphae_PBMC_7d_IFNy	-0.445631	0.0125019
rs1052553	A	C,Albicansconidia_PBMC_7d_IL-22	-0.507204	0.0126323
rs539514	T	S,Aureus_PBMC_24h_IL-8	0.187523	0.0136211
rs539514	T	S,Aureus_PBMC_24h_IL-1b	0.115307	0.0139792
rs539514	T	S,Aureus_PBMC_24h_IL-10	0.279566	0.0141308
rs229533	C	C,Albicansconidia_PBMC_24h_TNF-a	-0.210133	0.0143841
rs11954020	G	LPS100ng_PBMC_24h_IL-8	-0.107869	0.0149568
rs2269241	C	C16MSU_PBMC_24h_IL-1b	-0.573423	0.0150118
rs516246	T	LPS100ng_PBMC_24h_IL-6	0.189843	0.0155011
rs17166496	G	P3C_PBMC_24h_TNF-a	-0.260222	0.0155451
rs425105	T	BorreliaMix_PBMC_24h_IL-6	0.444567	0.0156296
rs2281808	C	E,Coli_PBMC_24h_IL-6	0.296317	0.0159891
rs4900384	G	S,Pneumoniae_PBMC_24h_IL-6	0.355662	0.0160244
rs10795791	G	S,Pneumoniae_PBMC_24h_IL-6	0.333325	0.0166442
rs1465788	C	P3C_PBMC_24h_MCP-1	0.266615	0.0168985
rs550448	A	S,Aureus_PBMC_24h_IL-6	0.291304	0.017021
rs10509540	T	S,Aureus_PBMC_24h_IL-1b	0.11468	0.0170547
rs10509540	T	S,Pneumoniae_PBMC_24h_IL-1b	0.387537	0.017908
rs516246	T	LPS100ng_PBMC_24h_IL-8	0.102628	0.0179284
rs10137082	C	C,Albicansconidia_PBMC_24h_IL-1b	-0.185428	0.0181165
rs10795791	G	BorreliaMix_PBMC_24h_IL-1b	0.282924	0.0181619
rs16956936	C	C,Albicansconidia_PBMC_7d_IL-17	-0.562673	0.0182464
rs1534422	G	E,Coli_PBMC_24h_IL-1b	0.303912	0.0185388
rs10137082	C	C,Albicanshyphae_PBMC_7d_IL-22	-0.415266	0.0191514
rs10795791	G	S,Pneumoniae_PBMC_24h_IL-1b	0.388492	0.0192276
rs11203203	A	LPS100ng_PBMC_24h_IL-1RA	-0.137312	0.0192474
rs550448	A	S,Aureus_PBMC_24h_TNF-a	0.450068	0.0193147
rs56994090	T	LPS100ng_PBMC_24h_IL-10	-0.261904	0.0197304
rs6691977	C	S,Pneumoniae_PBMC_7d_IL-17	-0.439778	0.0197947
rs5753037	T	LPS1ng_PBMC_24h_IL-6	-0.332483	0.0201539
rs2476601	A	LPS100ng_PBMC_24h_TNF-a	0.249485	0.0210398
rs9272346	G	P3C_PBMC_24h_IL-1b	0.195485	0.0210939
rs1893217	G	C,Albicansconidia_PBMC_24h_IL-10	-0.287438	0.0218533
rs539514	T	S,Aureus_PBMC_24h_IL-6	0.179651	0.022519
rs10517086	A	P3C_PBMC_24h_IL-6	-0.150628	0.0227337
rs2269241	C	C,Albicansconidia_PBMC_24h_IL-8	0.246061	0.022989
rs4505848	G	C,Albicansconidia_PBMC_7d_IFNy	0.322616	0.0230519
rs229533	C	C,Albicanshyphae_PBMC_7d_IL-17	0.380692	0.0234402
rs539514	T	LPS100ng_PBMC_24h_IL-10	0.20436	0.0236126
rs2269241	C	S,Aureus_PBMC_24h_IL-1RA	0.197392	0.0236177
rs689	T	S,Pneumoniae_PBMC_24h_IL-6	-0.428427	0.0237094
rs516246	T	C16MSU_PBMC_24h_IL-1b	-0.341439	0.0241342
rs11954020	G	C,Albicansconidia_PBMC_7d_IL-17	-0.336326	0.0242565
rs10795791	G	E,Coli_PBMC_24h_IL-1b	0.280867	0.0246034
rs9272346	G	C,Albicansconidia_PBMC_24h_IL-1RA	0.21187	0.0247411
rs539514	T	C,Albicansconidia_PBMC_24h_IL-8	0.163193	0.0251228
rs2611215	A	S,Aureus_PBMC_24h_IL-8	0.207864	0.025339
rs10509540	T	LPS1ng_PBMC_24h_MCP-1	0.261147	0.0253582
rs10137082	C	S,Pneumoniae_PBMC_24h_IL-1b	-0.397835	0.0258315
rs7020673	G	LPS1ng_PBMC_24h_MCP-1	-0.247567	0.025968
rs550448	A	C,Albicansconidia_PBMC_24h_TNF-a	0.291362	0.0265145
rs653178	C	LPS100ng_PBMC_24h_IL-1b	-0.205707	0.0274141
rs2165738	C	LPS1ng_PBMC_24h_IL-6	-0.363125	0.0275186
rs425105	T	LPS100ng_PBMC_24h_MCP-1	0.417378	0.0277245
rs11954020	G	C16MSU_PBMC_24h_IL-1b	-0.340631	0.0278954
rs947474	A	P3C_PBMC_24h_IL-1RA	-0.137263	0.0279605
rs1615504	T	S,Aureus_PBMC_24h_IL-1RA	0.138422	0.0284285
rs516246	T	S,Aureus_PBMC_24h_IL-1b	0.0975684	0.0293478
rs653178	C	S,Pneumoniae_PBMC_24h_IL-1b	-0.325629	0.0297968
rs62447205	A	P3C_PBMC_24h_TNF-a	0.229997	0.0300719
rs7202877	G	S,Pneumoniae_PBMC_7d_IL-17	-0.529447	0.0303058
rs16956936	C	LPS1ng_PBMC_24h_IL-10	0.479208	0.0303611
rs10517086	A	C,Albicansconidia_PBMC_24h_IL-6	-0.157768	0.0305673
rs2292239	T	IMQ_PBMC_7d_IFNy	0.295309	0.0308458
rs6691977	C	P3C_PBMC_24h_MCP-1	0.255578	0.0309263
rs7804356	T	LPS100ng_PBMC_24h_IL-8	-0.114877	0.0311417
rs4849135	G	C,Albicanshyphae_PBMC_7d_IL-17	-0.389832	0.0315582
rs516246	T	S,Aureus_PBMC_24h_IL-6	0.161223	0.031802
rs947474	A	S,Aureus_PBMC_24h_IL-1b	-0.116976	0.0319284
rs4788084	C	C16MSU_PBMC_24h_IL-1b	-0.346103	0.0334929
rs516246	T	C,Albicansconidia_PBMC_24h_IL-1b	0.142466	0.0337092
rs2304256	C	LPS100ng_PBMC_24h_IL-1RA	0.132769	0.0343695
rs72727394	T	MTB_PBMC_24h_IL-1b	0.371193	0.0345688
rs11954020	G	E,Coli_PBMC_24h_IL-1b	-0.248072	0.0346136
rs2292239	T	S,Aureus_PBMC_24h_IL-1b	-0.0985774	0.0346854
rs62447205	A	P3C_PBMC_24h_IL-6	0.149603	0.0349151
rs72727394	T	S,Pneumoniae_PBMC_24h_IL-1b	0.406429	0.035097
rs9388489	G	C,Burnetiiserum_PBMC_24h_TNF-a	0.173175	0.0353866
rs3825932	T	BorreliaMix_PBMC_24h_IL-1b	-0.250812	0.03549
rs2292239	T	C,Burnetiiserum_PBMC_24h_TNF-a	-0.181597	0.0355791
rs10509540	T	S,Aureus_PBMC_24h_TNF-a	0.267287	0.0356042
rs1615504	T	BorreliaMix_PBMC_24h_IL-6	0.294575	0.0356895
rs11954020	G	LPS1ng_PBMC_24h_MCP-1	-0.233636	0.0356918
rs6518350	A	C,Albicanshyphae_PBMC_7d_IL-22	-0.470438	0.0359978
rs10795791	G	LPS100ng_PBMC_24h_IL-1b	0.216791	0.0360818
rs550448	A	C,Albicansconidia_PBMC_24h_IL-1b	0.228317	0.0365882
rs2281808	C	S,Aureus_PBMC_24h_IL-6	0.173107	0.037463
rs12444268	A	C,Albicansconidia_PBMC_7d_IL-17	-0.412457	0.0378845
rs6547853	G	C,Albicansconidia_PBMC_7d_IL-17	-0.303387	0.0382009
rs516246	T	P3C_PBMC_24h_IL-6	0.127062	0.0388522
rs10137082	C	LPS1ng_PBMC_24h_IL-1RA	-0.211905	0.0391607
rs2611215	A	C,Albicansconidia_PBMC_24h_IL-1b	0.177306	0.0392471
rs689	T	S,Pneumoniae_PBMC_24h_IL-1b	-0.464595	0.0397918
rs1615504	T	S,Aureus_PBMC_24h_IL-1b	0.103836	0.0400425
rs478222	A	P3C_PBMC_24h_IL-1b	0.120572	0.0400806
rs689	T	C,Albicansconidia_PBMC_24h_IL-1b	-0.203704	0.0404563
rs4849135	G	C,Albicansconidia_PBMC_24h_IL-10	-0.232809	0.0405367
rs4900384	G	S,Pneumoniae_PBMC_7d_IL-17	-0.357959	0.0406476
rs10509540	T	LPS100ng_PBMC_24h_IL-1RA	0.11788	0.0407446
rs10517086	A	P3C_PBMC_24h_MCP-1	-0.208598	0.0410138
rs550448	A	C,Albicansconidia_PBMC_7d_IL-22	-0.539701	0.0411906
rs4505848	G	C,Albicansconidia_PBMC_7d_IL-22	0.331876	0.0412066
rs4763879	A	S,Aureus_PBMC_24h_IL-8	0.151488	0.0415773
rs6691977	C	BorreliaMix_PBMC_24h_IL-6	-0.316155	0.0417972
rs1983853	C	C16MSU_PBMC_24h_IL-1b	0.612073	0.0425607
rs4763879	A	LPS1ng_PBMC_24h_IL-10	0.281328	0.0426011
rs56994090	T	P3C_PBMC_24h_IL-6	-0.162729	0.0428424
rs1465788	C	S,Aureus_PBMC_24h_IL-1RA	-0.133632	0.0430459
rs10509540	T	S,Pneumoniae_PBMC_24h_IL-6	0.278118	0.0432833
rs5753037	T	S,Aureus_PBMC_24h_TNF-a	-0.259949	0.0433129
rs947474	A	S,Aureus_PBMC_24h_IL-1RA	-0.137764	0.0433968
rs516246	T	C,Albicansconidia_PBMC_24h_IL-6	0.137002	0.0434048
rs2281808	C	S,Aureus_PBMC_24h_IL-10	0.243154	0.0436609
rs2281808	C	LPS1ng_PBMC_24h_IL-6	0.294084	0.0441181
rs16956936	C	C,Burnetiiserum_PBMC_24h_TNF-a	0.272544	0.0444234
rs1052553	A	LPS1ng_PBMC_24h_IL-8	0.230127	0.0446791
rs72727394	T	LPS100ng_PBMC_24h_IL-6	0.199141	0.0451558
rs9272346	G	C,Albicanshyphae_PBMC_24h_IL-6	0.276028	0.045396
rs425105	T	LPS1ng_PBMC_24h_MCP-1	0.322349	0.0456683
rs5753037	T	LPS1ng_PBMC_24h_IL-8	-0.198237	0.0456958
rs11954020	G	C,Albicansconidia_PBMC_24h_IL-8	-0.141836	0.0461197
rs1893217	G	LPS100ng_PBMC_24h_TNF-a	0.207139	0.0467841
rs1615504	T	S,Pneumoniae_PBMC_24h_IL-6	0.287286	0.0468297
rs689	T	S,Aureus_PBMC_24h_IL-8	0.213646	0.0470432
rs4849135	G	C,Albicansconidia_PBMC_24h_IL-8	-0.158598	0.0472239
rs3087243	G	LPS1ng_PBMC_24h_IL-1b	-0.312158	0.0473103
rs653178	C	P3C_PBMC_24h_IL-8	-0.0781967	0.0490484
rs72928038	A	BorreliaMix_PBMC_24h_IL-1b	-0.308811	0.0494755
rs653178	C	MTB_PBMC_24h_IL-6	-0.263375	0.0495142
rs2165738	C	E,Coli_PBMC_24h_IL-6	-0.273212	0.0496424
rs1465788	C	S,Pneumoniae_PBMC_7d_IL-17	0.350081	0.0497652
rs2269241	C	LPS1ng_PBMC_24h_IL-1RA	0.268201	0.0499635
rs2304256	C	P3C_PBMC_24h_TNF-a	-0.21105	0.0502212
rs947474	A	LPS1ng_PBMC_24h_IL-10	0.323046	0.0502963
rs9585056	C	LPS100ng_PBMC_24h_MCP-1	0.307421	0.0504969
rs653178	C	LPS100ng_PBMC_24h_MCP-1	-0.24616	0.050535
rs10517086	A	C,Albicansconidia_PBMC_24h_IL-1RA	-0.143837	0.0507185
rs1893217	G	C,Albicansconidia_PBMC_24h_IL-1RA	-0.16953	0.0508681
rs7020673	G	LPS1ng_PBMC_24h_IL-6	-0.262951	0.0514394
rs10795791	G	C,Albicansconidia_PBMC_24h_IL-8	0.147314	0.0518692
rs653178	C	LPS100ng_PBMC_24h_IL-6	-0.150081	0.0521796
rs12444268	A	S,Aureus_PBMC_24h_IL-1b	-0.118351	0.0522609
rs2304256	C	LPS100ng_PBMC_24h_TNF-a	-0.186075	0.052943
rs11954020	G	LPS100ng_PBMC_24h_IL-1b	-0.188045	0.0530036
rs3087243	G	P3C_PBMC_24h_IL-10	-0.17487	0.0532409
rs11258747	T	C,Albicanshyphae_PBMC_7d_IFNy	0.345217	0.0539637
rs193778	G	C,Albicansconidia_PBMC_7d_IL-22	-0.353391	0.0540951
rs689	T	LPS100ng_PBMC_24h_TNF-a	-0.233985	0.0543448
rs9585056	C	LPS100ng_PBMC_24h_IL-8	-0.102596	0.054426
rs5753037	T	S,Aureus_PBMC_24h_IL-8	-0.151824	0.0544489
rs947474	A	C,Burnetiiserum_PBMC_24h_TNF-a	-0.194223	0.0545956
rs229533	C	S,Aureus_PBMC_24h_IL-8	0.148687	0.0547787
rs72727394	T	IMQ_PBMC_24h_IL-6	0.308687	0.0552739
rs62447205	A	C,Albicansconidia_PBMC_24h_IL-8	0.153768	0.0552778
rs11954020	G	E,Coli_PBMC_24h_IL-6	-0.218082	0.0555233
rs9272346	G	C,Albicansconidia_PBMC_24h_IL-1b	0.177426	0.0558595
rs4849135	G	P3C_PBMC_24h_IL-1b	0.135107	0.0558709
rs2281808	C	LPS100ng_PBMC_24h_IL-1b	-0.201159	0.0559553
rs4505848	G	C,Albicanshyphae_PBMC_7d_IFNy	0.292345	0.0560376
rs653178	C	S,Pneumoniae_PBMC_7d_IL-17	0.28426	0.0561002
rs10137082	C	C,Albicansconidia_PBMC_7d_IL-22	-0.362071	0.0571119
rs4505848	G	BorreliaMix_PBMC_24h_IL-6	0.236087	0.0579804
rs11574435	C	LPS1ng_PBMC_24h_MCP-1	0.416327	0.0580596
rs653178	C	P3C_PBMC_24h_IL-6	-0.114651	0.058129
rs10509540	T	MTB_PBMC_24h_IL-6	0.27759	0.0584084
rs9585056	C	BorreliaMix_PBMC_24h_IL-1b	-0.255653	0.058763
rs2165738	C	C,Albicansconidia_PBMC_24h_IL-6	-0.160125	0.0591498
rs6547853	G	E,Coli_PBMC_24h_IL-1b	0.216992	0.0595001
rs62447205	A	BorreliaMix_PBMC_7d_IFNy	-0.22654	0.059614
rs425105	T	C,Albicansconidia_PBMC_7d_IFNy	0.396283	0.0599441
rs11954020	G	C,Albicansconidia_PBMC_24h_IL-1b	-0.129239	0.0599553
rs1983853	C	LPS1ng_PBMC_24h_IL-1RA	-0.32853	0.060204
rs56994090	T	C,Albicanshyphae_PBMC_24h_IL-6	-0.245195	0.0602195
rs2476601	A	C,Albicanshyphae_PBMC_24h_IL-6	0.247755	0.0602263
rs3024505	G	C,Burnetiiserum_PBMC_24h_TNF-a	-0.230122	0.0611423
rs12927355	C	LPS100ng_PBMC_24h_IL-6	0.163064	0.0617214
rs11203203	A	LPS100ng_PBMC_24h_IL-10	-0.176446	0.0619076
rs7020673	G	BorreliaMix_PBMC_24h_IL-1b	0.210476	0.061967
rs16956936	C	S,Aureus_PBMC_24h_IL-1RA	0.170906	0.0621458
rs11574435	C	IMQ_PBMC_7d_IFNy	0.494509	0.0623155
rs2281808	C	S,Pneumoniae_PBMC_24h_IL-1b	-0.315099	0.0624376
rs10137082	C	LPS100ng_PBMC_24h_IL-1b	-0.207277	0.0625911
rs2304256	C	C,Albicansconidia_PBMC_24h_TNF-a	-0.176128	0.0627874
rs425105	T	BorreliaMix_PBMC_24h_IL-1b	0.303845	0.0629602
rs1893217	G	P3C_PBMC_24h_IL-6	-0.145126	0.0633326
rs653178	C	S,Aureus_PBMC_24h_IL-6	-0.13722	0.0634154
rs56994090	T	C16MSU_PBMC_24h_IL-1b	0.367093	0.0639576
rs6691977	C	LPS100ng_PBMC_24h_IL-1b	-0.219907	0.0640735
rs12679857	A	LPS100ng_PBMC_24h_MCP-1	-0.264263	0.0643794
rs10786436	T	BorreliaMix_PBMC_24h_IL-1b	-0.231992	0.0645666
rs12927355	C	C,Albicanshyphae_PBMC_24h_TNF-a	-0.218497	0.0647223
rs11203203	A	S,Aureus_PBMC_24h_IL-1RA	-0.113284	0.0653113
rs17166496	G	LPS100ng_PBMC_24h_IL-1b	-0.20512	0.0655043
rs3825932	T	C16MSU_PBMC_24h_IL-1b	-0.302687	0.0655887
rs62447205	A	S,Aureus_PBMC_24h_IL-8	0.154302	0.0656494
rs947474	A	C,Albicansconidia_PBMC_24h_IL-1RA	-0.153122	0.0660766
rs10137082	C	C,Albicansconidia_PBMC_7d_IFNy	-0.305574	0.0663817
rs2292239	T	S,Aureus_PBMC_24h_IL-1RA	-0.107252	0.0663962
rs10137082	C	S,Pneumoniae_PBMC_24h_IL-6	-0.275426	0.0664857
rs17166496	G	S,Aureus_PBMC_24h_IL-10	0.233752	0.0670092
rs3825932	T	S,Pneumoniae_PBMC_24h_IL-6	-0.25391	0.0674544
rs478222	A	C,Albicansconidia_PBMC_24h_IL-10	-0.173059	0.0674588
rs2290400	C	C,Albicansconidia_PBMC_24h_IL-10	0.199108	0.0685432
rs72928038	A	C,Albicanshyphae_PBMC_7d_IFNy	0.3965	0.0691653
rs1465788	C	LPS100ng_PBMC_24h_MCP-1	0.274315	0.0694273
rs516246	T	S,Aureus_PBMC_24h_TNF-a	0.214962	0.069697
rs10137082	C	LPS100ng_PBMC_24h_IL-6	-0.166972	0.0699881
rs17166496	G	LPS100ng_PBMC_24h_TNF-a	-0.174324	0.0700756
rs56994090	T	LPS100ng_PBMC_24h_IL-6	-0.186125	0.0701182
rs1465788	C	C,Albicansconidia_PBMC_7d_IFNy	0.303341	0.0702744
rs10795791	G	LPS1ng_PBMC_24h_IL-1b	0.285789	0.0702999
rs539514	T	E,Coli_PBMC_24h_IL-1b	-0.218122	0.0705835
rs72727394	T	S,Aureus_PBMC_24h_TNF-a	0.270817	0.070757
rs72928038	A	C,Albicansconidia_PBMC_7d_IL-17	0.376745	0.0710614
rs6691977	C	MTB_PBMC_24h_IL-6	-0.307719	0.0712209
rs9272346	G	LPS1ng_PBMC_24h_IL-1b	-0.361234	0.0712468
rs425105	T	C,Albicanshyphae_PBMC_7d_IL-22	0.405889	0.0712616
rs2611215	A	P3C_PBMC_24h_IL-1b	0.142006	0.0716152
rs10517086	A	C,Albicanshyphae_PBMC_24h_IL-6	-0.193758	0.0716534
rs947474	A	BorreliaMix_PBMC_24h_IL-1b	-0.241364	0.072148
rs425105	T	LPS100ng_PBMC_24h_IL-1b	0.253441	0.0721565
rs3087243	G	LPS1ng_PBMC_24h_MCP-1	-0.212792	0.0721908
rs2304256	C	S,Aureus_PBMC_24h_IL-8	0.152969	0.072367
rs1615504	T	C,Albicansconidia_PBMC_7d_IFNy	-0.287991	0.0726263
rs11203203	A	C,Albicansconidia_PBMC_7d_IFNy	0.279067	0.0733092
rs62447205	A	LPS100ng_PBMC_24h_IL-6	0.162495	0.0733865
rs10517086	A	IMQ_PBMC_7d_IFNy	0.253237	0.0736063
rs62447205	A	MTB_PBMC_24h_IL-6	0.281671	0.0736494
rs11574435	C	C16MSU_PBMC_24h_IL-1b	0.54757	0.0737844
rs3825932	T	BorreliaMix_PBMC_24h_IL-6	-0.240985	0.0739163
rs653178	C	C,Albicanshyphae_PBMC_24h_IL-6	-0.175546	0.0739558
rs4788084	C	LPS1ng_PBMC_24h_IL-6	0.252996	0.0745499
rs2269241	C	P3C_PBMC_24h_TNF-a	-0.255745	0.0748697
rs4788084	C	LPS1ng_PBMC_24h_IL-1b	0.277263	0.0750119
rs9585056	C	LPS100ng_PBMC_24h_TNF-a	-0.179509	0.0750321
rs6691977	C	BorreliaMix_PBMC_24h_IL-1b	-0.245255	0.0750382
rs4505848	G	S,Aureus_PBMC_24h_IL-8	0.129412	0.075364
rs4505848	G	MTB_PBMC_24h_IL-6	0.243032	0.0753838
rs4788084	C	LPS1ng_PBMC_24h_IL-10	0.259057	0.0755295
rs1615504	T	P3C_PBMC_24h_IL-10	0.166817	0.0760062
rs13415583	T	E,Coli_PBMC_24h_IL-1b	-0.242292	0.0760315
rs2290400	C	LPS100ng_PBMC_24h_IL-1b	-0.186286	0.0760362
rs10517086	A	C,Albicanshyphae_PBMC_7d_IL-17	0.301777	0.0760425
rs653178	C	C,Albicansconidia_PBMC_24h_IL-1b	-0.117154	0.0761407
rs11574435	C	BorreliaMix_PBMC_24h_IL-6	0.445123	0.0763538
rs516246	T	LPS1ng_PBMC_24h_IL-8	0.16177	0.0767427
rs2290400	C	E,Coli_PBMC_24h_IL-1b	-0.224682	0.076791
rs10137082	C	P3C_PBMC_24h_IL-1b	-0.127221	0.0774136
rs7804356	T	C,Albicansconidia_PBMC_24h_IL-10	0.214702	0.0774267
rs10517086	A	P3C_PBMC_24h_IL-1RA	-0.0976459	0.0776163
rs6691977	C	P3C_PBMC_24h_IL-8	0.0891394	0.0778283
rs2165738	C	LPS100ng_PBMC_24h_IL-10	-0.190082	0.0779657
rs539514	T	C,Albicansconidia_PBMC_24h_IL-10	0.18308	0.0780778
rs72727394	T	P3C_PBMC_24h_TNF-a	-0.205175	0.0781834
rs947474	A	C,Albicansconidia_PBMC_24h_IL-1b	-0.143991	0.0784244
rs2611215	A	MTB_PBMC_24h_IL-6	0.307591	0.0787923
rs550448	A	BorreliaMix_PBMC_7d_IFNy	-0.298116	0.0792141
rs1990760	T	C,Albicanshyphae_PBMC_24h_TNF-a	0.203955	0.0798841
rs2292239	T	LPS100ng_PBMC_24h_IL-10	-0.157344	0.0800179
rs16956936	C	LPS100ng_PBMC_24h_IL-1RA	0.15353	0.0800894
rs2281808	C	IMQ_PBMC_7d_IFNy	-0.254946	0.0801012
rs6691977	C	LPS100ng_PBMC_24h_IL-6	-0.172009	0.0802556
rs3087243	G	LPS1ng_PBMC_24h_IL-6	-0.250903	0.0804552
rs12444268	A	S,Aureus_PBMC_24h_IL-1RA	-0.133344	0.0804843
rs1534422	G	E,Coli_PBMC_24h_IL-6	0.2192	0.0806228
rs2611215	A	BorreliaMix_PBMC_24h_IL-6	0.278627	0.0807148
rs1465788	C	C,Albicanshyphae_PBMC_24h_IL-6	-0.205437	0.0813004
rs3087243	G	IMQ_PBMC_7d_IFNy	-0.248814	0.0817574
rs9272346	G	P3C_PBMC_24h_IL-1RA	0.123514	0.0820859
rs1465788	C	C,Burnetiiserum_PBMC_24h_TNF-a	-0.170009	0.0825838
rs12679857	A	P3C_PBMC_24h_IL-10	0.161241	0.0826656
rs2269241	C	C,Albicansconidia_PBMC_24h_IL-1RA	0.184796	0.0833553
rs10137082	C	IMQ_PBMC_24h_IL-6	-0.258353	0.0834997
rs10517086	A	S,Aureus_PBMC_24h_IL-8	-0.13531	0.0838253
rs4505848	G	C,Burnetiiserum_PBMC_24h_TNF-a	0.143661	0.0840855
rs72727394	T	S,Pneumoniae_PBMC_7d_IL-17	0.330245	0.0847827
rs478222	A	S,Aureus_PBMC_24h_IL-8	-0.119735	0.0850118
rs62447205	A	LPS1ng_PBMC_24h_IL-1RA	0.174488	0.0851178
rs1893217	G	P3C_PBMC_24h_IL-10	-0.182027	0.0852682
rs4788084	C	LPS1ng_PBMC_24h_IL-1RA	0.162381	0.085421
rs10509540	T	LPS100ng_PBMC_24h_MCP-1	0.236705	0.085837
rs1615504	T	S,Pneumoniae_PBMC_24h_IL-1b	0.295953	0.0861192
rs4505848	G	BorreliaMix_PBMC_24h_IL-1b	0.189247	0.0865295
rs516246	T	P3C_PBMC_24h_IL-8	0.0693374	0.0866348
rs425105	T	P3C_PBMC_24h_TNF-a	0.233398	0.0874986
rs550448	A	S,Aureus_PBMC_24h_IL-10	0.302898	0.0877654
rs6691977	C	C,Albicansconidia_PBMC_7d_IL-22	-0.346828	0.0878831
rs550448	A	S,Aureus_PBMC_24h_IL-1b	0.124606	0.0880985
rs11258747	T	BorreliaMix_PBMC_7d_IFNy	0.208447	0.088374
rs10786436	T	LPS100ng_PBMC_24h_IL-6	0.152511	0.0888762
rs516246	T	C,Albicansconidia_PBMC_24h_TNF-a	0.137409	0.089346
rs539514	T	IMQ_PBMC_24h_IL-6	0.227236	0.0893737
rs10786436	T	C,Albicansconidia_PBMC_24h_IL-6	0.131264	0.0897056
rs1615504	T	LPS100ng_PBMC_24h_IL-1RA	0.10281	0.0897369
rs17166496	G	P3C_PBMC_24h_IL-10	0.165647	0.0897761
rs1052553	A	LPS100ng_PBMC_24h_IL-8	0.092645	0.0898408
rs1615504	T	E,Coli_PBMC_24h_IL-6	0.21335	0.089866
rs72928038	A	LPS100ng_PBMC_24h_IL-1b	-0.229757	0.0904887
rs653178	C	IMQ_PBMC_24h_IL-6	-0.211966	0.0907359
rs1990760	T	C,Burnetiiserum_PBMC_24h_TNF-a	0.153393	0.0908788
rs1465788	C	C16MSU_PBMC_24h_IL-1b	-0.302442	0.0911062
rs72727394	T	IMQ_PBMC_7d_IFNy	0.280965	0.0912777
rs2292239	T	C,Albicanshyphae_PBMC_24h_IL-6	-0.175636	0.0918178
rs6547853	G	C,Albicanshyphae_PBMC_24h_IL-1b	0.118482	0.0918711
rs229533	C	IMQ_PBMC_24h_IL-6	0.228973	0.0918905
rs10137082	C	E,Coli_PBMC_24h_IL-1b	-0.227038	0.0919015
rs947474	A	C,Albicansconidia_PBMC_24h_IL-6	-0.139255	0.0922245
rs1052553	A	C,Albicanshyphae_PBMC_7d_IL-22	-0.321022	0.0922472
rs1052553	A	E,Coli_PBMC_24h_IL-6	0.235591	0.0922945
rs10137082	C	P3C_PBMC_24h_IL-8	-0.0797584	0.0924249
rs11574435	C	S,Pneumoniae_PBMC_24h_IL-6	0.435222	0.0925993
rs1893217	G	LPS100ng_PBMC_24h_IL-1b	0.203061	0.0926337
rs10795791	G	S,Pneumoniae_PBMC_7d_IL-17	-0.277525	0.0927653
rs4900384	G	E,Coli_PBMC_24h_IL-1b	0.22346	0.0928012
rs72928038	A	C,Albicansconidia_PBMC_7d_IFNy	0.340725	0.0931567
rs6518350	A	P3C_PBMC_24h_TNF-a	-0.228601	0.0937307
rs9585056	C	S,Pneumoniae_PBMC_7d_IL-17	0.311545	0.0939496
rs689	T	C,Albicansconidia_PBMC_24h_TNF-a	-0.200409	0.0944127
rs653178	C	LPS100ng_PBMC_24h_IL-1RA	-0.0882332	0.094582
rs72928038	A	LPS100ng_PBMC_24h_TNF-a	-0.195867	0.0948937
rs62447205	A	S,Aureus_PBMC_24h_IL-6	0.144973	0.0949076
rs1893217	G	C,Albicansconidia_PBMC_7d_IFNy	0.300633	0.0958903
rs2165738	C	C,Albicanshyphae_PBMC_24h_IL-6	-0.208052	0.0960684
rs72928038	A	C,Albicansconidia_PBMC_24h_IL-8	-0.165273	0.0962503
rs12444268	A	S,Pneumoniae_PBMC_24h_IL-6	-0.289869	0.0965304
rs11203203	A	P3C_PBMC_24h_IL-10	-0.151774	0.0966679
rs947474	A	C,Albicansconidia_PBMC_24h_IL-8	-0.140663	0.097083
rs2292239	T	E,Coli_PBMC_24h_IL-1b	0.198734	0.0973001
rs11203203	A	LPS1ng_PBMC_24h_IL-6	0.240143	0.0973016
rs478222	A	LPS100ng_PBMC_24h_IL-8	-0.0689413	0.0974461
rs56994090	T	S,Aureus_PBMC_24h_IL-8	-0.157373	0.0976032
rs2292239	T	C,Albicanshyphae_PBMC_7d_IL-17	-0.272897	0.0976288
rs2269241	C	S,Aureus_PBMC_24h_IL-8	0.18743	0.0983075
rs4900384	G	C,Albicansconidia_PBMC_24h_IL-1b	0.128315	0.0987182
rs12927355	C	C,Albicanshyphae_PBMC_24h_IL-1b	-0.128514	0.0987678
rs2476601	A	C,Albicansconidia_PBMC_24h_IL-8	0.151714	0.0987975
rs1893217	G	P3C_PBMC_24h_IL-1RA	-0.107642	0.0992196
rs2304256	C	P3C_PBMC_24h_IL-8	0.0778664	0.100482
rs16956936	C	C,Albicanshyphae_PBMC_7d_IL-17	0.424014	0.100844
rs10517086	A	S,Aureus_PBMC_24h_IL-6	-0.132766	0.101278
rs1534422	G	C,Albicansconidia_PBMC_24h_IL-8	-0.128379	0.101586
rs3087243	G	S,Aureus_PBMC_24h_IL-6	-0.13385	0.101797
rs9585056	C	LPS100ng_PBMC_24h_IL-1RA	-0.107835	0.101845
rs6691977	C	P3C_PBMC_24h_IL-10	0.170225	0.102163
rs478222	A	C,Albicanshyphae_PBMC_7d_IL-17	0.246927	0.102402
rs10509540	T	C16MSU_PBMC_24h_IL-1b	0.266599	0.102407
rs1983853	C	P3C_PBMC_24h_IL-1RA	-0.167233	0.10247
rs2476601	A	S,Aureus_PBMC_24h_IL-8	0.156424	0.103239
rs425105	T	C,Albicansconidia_PBMC_24h_IL-8	0.168033	0.103645
rs653178	C	LPS1ng_PBMC_24h_MCP-1	-0.17429	0.10376
rs2476601	A	MTB_PBMC_24h_IL-1b	0.298868	0.103782
rs10137082	C	BorreliaMix_PBMC_24h_IL-6	-0.237154	0.103964
rs16956936	C	C,Albicansconidia_PBMC_7d_IFNy	-0.377973	0.10399
rs16956936	C	LPS100ng_PBMC_24h_IL-10	0.229246	0.10411
rs1615504	T	MTB_PBMC_24h_IL-6	0.249848	0.105143
rs689	T	E,Coli_PBMC_24h_IL-1b	-0.275871	0.105503
rs6691977	C	C,Albicansconidia_PBMC_7d_IL-17	-0.295553	0.106118
rs653178	C	E,Coli_PBMC_24h_IL-1b	-0.182713	0.106183
rs9585056	C	C,Albicansconidia_PBMC_24h_IL-6	-0.134627	0.106498
rs7804356	T	S,Pneumoniae_PBMC_24h_IL-1b	-0.302943	0.106552
rs539514	T	P3C_PBMC_24h_IL-8	0.0684821	0.106952
rs10517086	A	P3C_PBMC_24h_IL-8	-0.0701567	0.107381
rs4900384	G	S,Pneumoniae_PBMC_24h_IL-1b	0.284349	0.107555
rs16956936	C	LPS100ng_PBMC_24h_IL-6	0.206686	0.10829
rs653178	C	LPS100ng_PBMC_24h_IL-8	-0.0686391	0.108589
rs1534422	G	C,Albicansconidia_PBMC_24h_TNF-a	-0.146029	0.108946
rs2165738	C	C,Albicanshyphae_PBMC_24h_IL-1b	-0.140568	0.109105
rs1983853	C	S,Aureus_PBMC_24h_IL-1RA	-0.178765	0.109664
rs2304256	C	P3C_PBMC_24h_IL-1RA	0.0963802	0.109674
rs10137082	C	S,Aureus_PBMC_24h_IL-1b	-0.0840095	0.110148
rs7804356	T	C16MSU_PBMC_24h_IL-1b	-0.297921	0.11019
rs56994090	T	C,Albicanshyphae_PBMC_24h_TNF-a	0.222631	0.110221
rs72928038	A	C,Albicanshyphae_PBMC_24h_TNF-a	0.243081	0.110431
rs7804356	T	C,Albicansconidia_PBMC_24h_IL-8	-0.136388	0.110813
rs10509540	T	LPS100ng_PBMC_24h_IL-8	0.074476	0.111345
rs1534422	G	C,Albicansconidia_PBMC_7d_IFNy	-0.254638	0.11192
rs924043	C	C,Albicansconidia_PBMC_7d_IL-22	0.40153	0.111964
rs1983853	C	S,Aureus_PBMC_24h_TNF-a	0.375235	0.112085
rs11258747	T	MTB_PBMC_24h_IL-1b	0.259296	0.112089
rs1615504	T	E,Coli_PBMC_24h_IL-1b	0.206284	0.112163
rs6518350	A	E,Coli_PBMC_24h_IL-6	-0.261504	0.113108
rs1615504	T	P3C_PBMC_24h_IL-8	0.0723556	0.1133
rs4900384	G	C,Albicanshyphae_PBMC_24h_TNF-a	0.195344	0.113305
rs2269241	C	C,Albicanshyphae_PBMC_24h_IL-6	0.246789	0.113474
rs56994090	T	C,Albicansconidia_PBMC_7d_IL-17	-0.302479	0.113692
rs17166496	G	P3C_PBMC_24h_IL-1b	-0.114029	0.113896
rs4763879	A	C,Albicanshyphae_PBMC_24h_IL-6	0.161894	0.113943
rs10137082	C	S,Pneumoniae_PBMC_7d_IL-17	0.2803	0.114402
rs12679857	A	LPS100ng_PBMC_24h_IL-10	0.151817	0.114766
rs12444268	A	BorreliaMix_PBMC_24h_IL-6	-0.267034	0.114969
rs10517086	A	S,Aureus_PBMC_24h_TNF-a	0.201001	0.115432
rs6518350	A	C,Albicanshyphae_PBMC_24h_IL-6	-0.23307	0.115454
rs4849135	G	C,Albicanshyphae_PBMC_24h_IL-1b	0.126965	0.115517
rs9272346	G	S,Aureus_PBMC_24h_TNF-a	-0.257935	0.115551
rs11203203	A	P3C_PBMC_24h_IL-8	-0.069836	0.115608
rs1615504	T	C,Burnetiiserum_PBMC_24h_TNF-a	0.147596	0.115651
rs1615504	T	C,Albicanshyphae_PBMC_24h_IL-1b	0.124597	0.115696
rs3087243	G	LPS100ng_PBMC_24h_IL-10	-0.147553	0.115766
rs11574435	C	S,Pneumoniae_PBMC_24h_IL-1b	0.485206	0.115795
rs4788084	C	LPS100ng_PBMC_24h_MCP-1	-0.216729	0.115832
rs11954020	G	MTB_PBMC_24h_IL-6	-0.219694	0.116001
rs13415583	T	C,Burnetiiserum_PBMC_24h_TNF-a	-0.154721	0.117118
rs10137082	C	C,Burnetiiserum_PBMC_24h_TNF-a	-0.152407	0.117478
rs10509540	T	BorreliaMix_PBMC_24h_IL-6	0.209158	0.118258
rs3087243	G	S,Pneumoniae_PBMC_24h_IL-1b	0.259526	0.118314
rs10795791	G	C,Albicanshyphae_PBMC_7d_IL-17	-0.269127	0.118348
rs62447205	A	LPS100ng_PBMC_24h_IL-8	0.0783441	0.118618
rs9272346	G	P3C_PBMC_24h_IL-6	0.132907	0.118667
rs689	T	BorreliaMix_PBMC_24h_IL-1b	-0.254606	0.119376
rs12927355	C	S,Aureus_PBMC_24h_IL-6	0.13004	0.119596
rs2304256	C	C16MSU_PBMC_24h_IL-1b	-0.276716	0.119872
rs1465788	C	LPS100ng_PBMC_24h_IL-1RA	-0.0984909	0.119918
rs12444268	A	C,Albicansconidia_PBMC_7d_IL-22	-0.343089	0.121133
rs4900384	G	S,Aureus_PBMC_24h_IL-1b	0.0803544	0.121636
rs16956936	C	C,Albicansconidia_PBMC_7d_IL-22	-0.41148	0.121863
rs12444268	A	P3C_PBMC_24h_IL-6	-0.1297	0.121886
rs1615504	T	C,Albicansconidia_PBMC_24h_TNF-a	-0.140999	0.122649
rs4900384	G	S,Aureus_PBMC_24h_TNF-a	0.211685	0.122668
rs12444268	A	BorreliaMix_PBMC_24h_IL-1b	-0.2314	0.123175
rs10786436	T	IMQ_PBMC_7d_IFNy	0.230892	0.123506
rs56994090	T	P3C_PBMC_24h_TNF-a	0.18535	0.12376
rs5753037	T	C,Albicansconidia_PBMC_24h_IL-1b	0.112497	0.123777
rs56994090	T	C,Burnetiiserum_PBMC_24h_TNF-a	0.167009	0.124042
rs12679857	A	C,Albicansconidia_PBMC_24h_IL-6	-0.11636	0.124749
rs17166496	G	IMQ_PBMC_24h_IL-6	-0.2294	0.124799
rs12679857	A	BorreliaMix_PBMC_24h_IL-6	-0.213195	0.124889
rs2281808	C	LPS1ng_PBMC_24h_IL-8	0.155429	0.125033
rs4763879	A	LPS100ng_PBMC_24h_IL-8	0.0683322	0.125241
rs689	T	IMQ_PBMC_24h_IL-6	-0.289608	0.125356
rs550448	A	IMQ_PBMC_7d_IFNy	-0.328433	0.125383
rs6518350	A	C,Albicansconidia_PBMC_24h_IL-1RA	-0.155228	0.125891
rs72727394	T	C,Albicansconidia_PBMC_24h_IL-1RA	0.132614	0.125917
rs7804356	T	C,Albicansconidia_PBMC_24h_IL-1b	-0.126352	0.126104
rs4763879	A	S,Aureus_PBMC_24h_IL-10	0.170806	0.126125
rs13415583	T	C,Albicansconidia_PBMC_24h_IL-6	0.123491	0.126137
rs425105	T	LPS100ng_PBMC_24h_IL-8	0.0985872	0.126596
rs2281808	C	S,Aureus_PBMC_24h_IL-8	0.1231	0.126673
rs72928038	A	P3C_PBMC_24h_IL-8	-0.0881207	0.127263
rs7020673	G	LPS1ng_PBMC_24h_IL-1b	-0.226321	0.127376
rs653178	C	E,Coli_PBMC_24h_IL-6	-0.166941	0.127845
rs1893217	G	P3C_PBMC_24h_TNF-a	0.178167	0.12796
rs9585056	C	S,Aureus_PBMC_24h_IL-1RA	-0.104706	0.128672
rs6547853	G	C,Albicanshyphae_PBMC_7d_IFNy	-0.23273	0.129227
rs56994090	T	P3C_PBMC_24h_IL-10	-0.165192	0.129362
rs4505848	G	LPS100ng_PBMC_24h_IL-1b	0.144514	0.129367
rs653178	C	C,Albicansconidia_PBMC_24h_TNF-a	-0.120574	0.129652
rs10509540	T	LPS1ng_PBMC_24h_IL-1RA	0.143228	0.129691
rs1893217	G	BorreliaMix_PBMC_24h_IL-1b	0.212284	0.129768
rs550448	A	C,Albicansconidia_PBMC_7d_IL-17	-0.360693	0.130273
rs7804356	T	S,Pneumoniae_PBMC_24h_IL-6	-0.23793	0.131062
rs72928038	A	S,Aureus_PBMC_24h_IL-8	-0.156767	0.131141
rs10137082	C	S,Aureus_PBMC_24h_IL-6	-0.133026	0.131505
rs6518350	A	P3C_PBMC_24h_IL-8	-0.0902466	0.132201
rs550448	A	P3C_PBMC_24h_MCP-1	-0.232943	0.132272
rs72928038	A	S,Pneumoniae_PBMC_7d_IL-17	-0.325699	0.132273
rs11203203	A	S,Pneumoniae_PBMC_24h_IL-6	-0.211538	0.132638
rs6547853	G	C,Albicanshyphae_PBMC_7d_IL-17	-0.238317	0.132754
rs11203203	A	LPS1ng_PBMC_24h_IL-1b	0.238979	0.133011
rs5753037	T	S,Aureus_PBMC_24h_IL-1b	-0.0732816	0.133259
rs11258747	T	C16MSU_PBMC_24h_IL-1b	-0.267087	0.133717
rs10517086	A	LPS100ng_PBMC_24h_TNF-a	0.132742	0.13374
rs17166496	G	LPS100ng_PBMC_24h_IL-8	-0.0763923	0.134222
rs478222	A	S,Aureus_PBMC_24h_TNF-a	0.169861	0.134322
rs947474	A	LPS100ng_PBMC_24h_IL-1RA	-0.0979226	0.134406
rs425105	T	C,Burnetiiserum_PBMC_24h_TNF-a	0.1845	0.134468
rs2304256	C	C,Albicansconidia_PBMC_7d_IFNy	-0.249439	0.134536
rs9272346	G	C,Albicanshyphae_PBMC_24h_IL-1b	0.145009	0.134918
rs2304256	C	P3C_PBMC_24h_MCP-1	0.166342	0.135204
[truncated: 2,938 more rows]

## Sheet: S5
Supplementary file 5: Genomic loci identified in T1D and meta-analysis
[truncated: 43 more rows]

[truncated: 1 more sheets: S6]
