# Supplementary figures and images for: A genome-wide functional genomics approach uncovers genetic determinants of immune phenotypes in type 1 diabetes
Source: eLife journal article supplement (doi:10.7554/elife.73709), 2022-05-24

Figure 1—figure supplement 1.

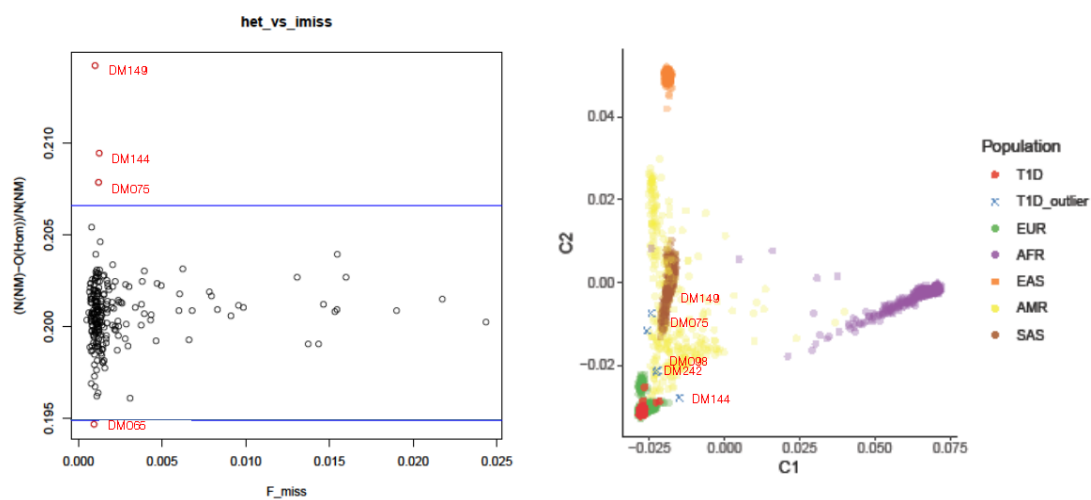

Supplement: supp [file elife-73709-supp-v1.zip › elife_poa_e73709_Figure_1_figure_supplement_1.pdf]

Figure 2—figure supplement 1.

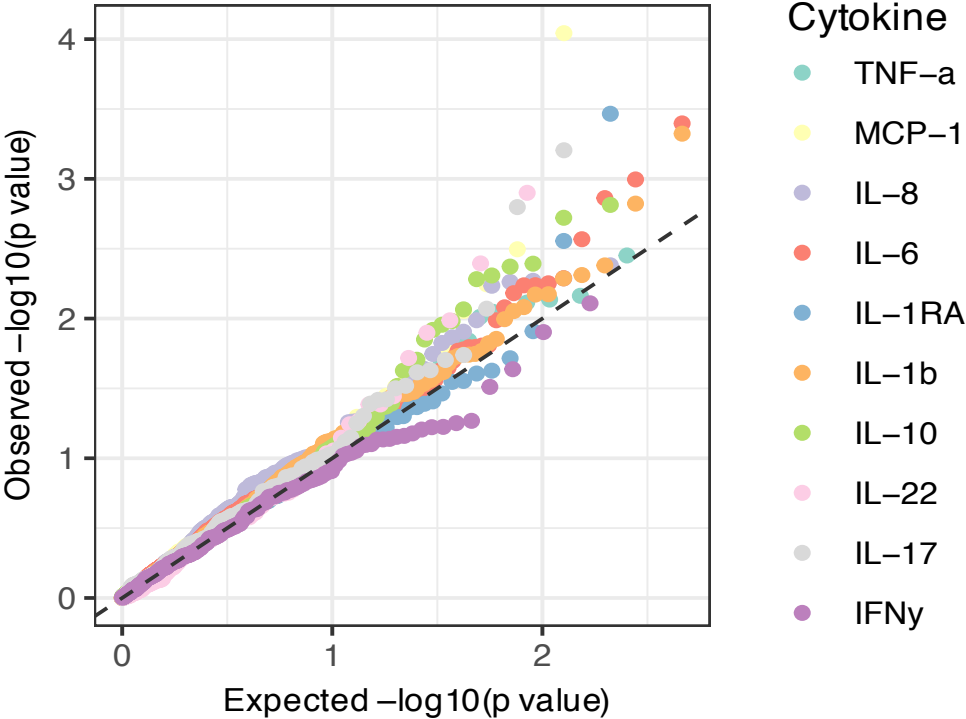

Supplement: supp [file elife-73709-supp-v1.zip › elife_poa_e73709_Figure_2_figure_supplement_1.pdf]

Figure 2—figure supplement 2.

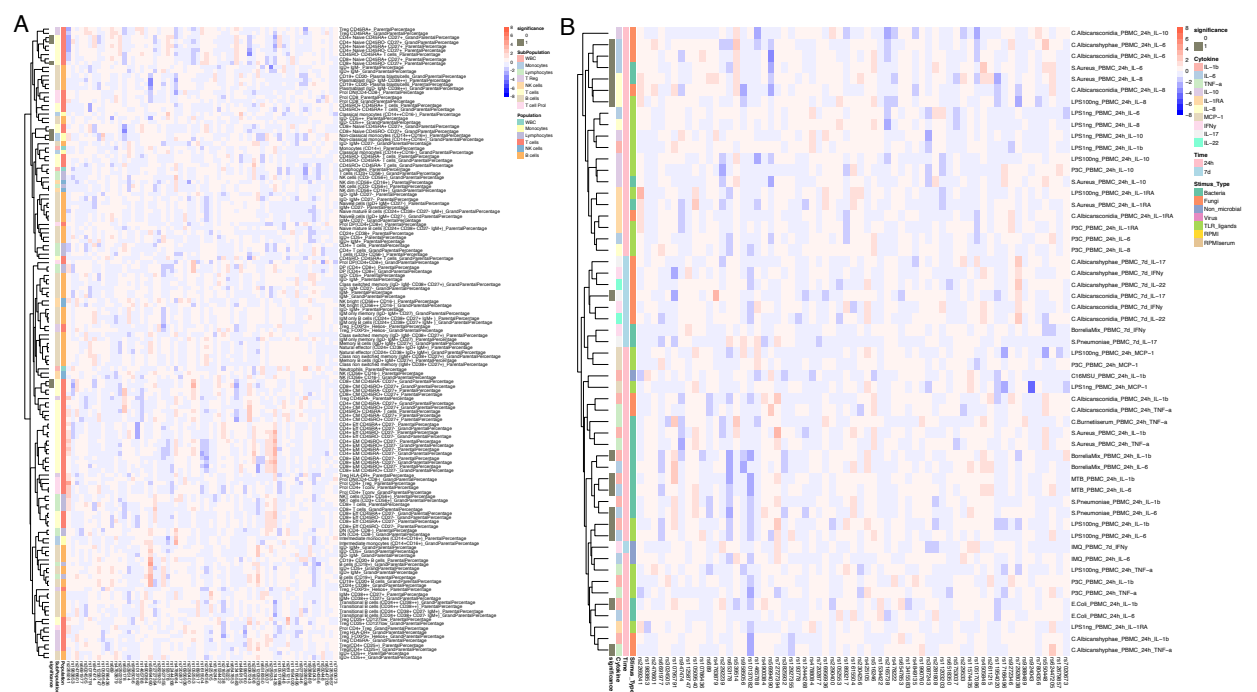

Supplement: supp [file elife-73709-supp-v1.zip › elife_poa_e73709_Figure_2_figure_supplement_2.pdf]

Figure 4—figure supplement 1.

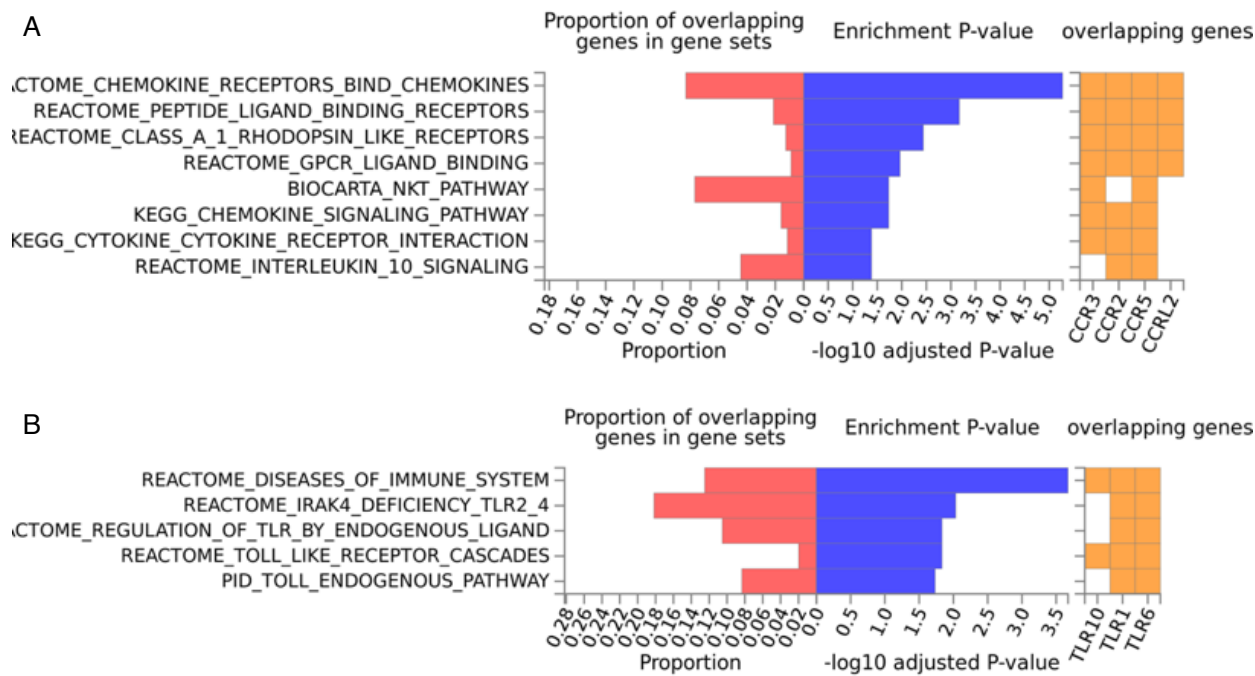

Supplement: supp [file elife-73709-supp-v1.zip › elife_poa_e73709_Figure_4_figure_supplement_1.pdf]

Figure 4—figure supplement 2.

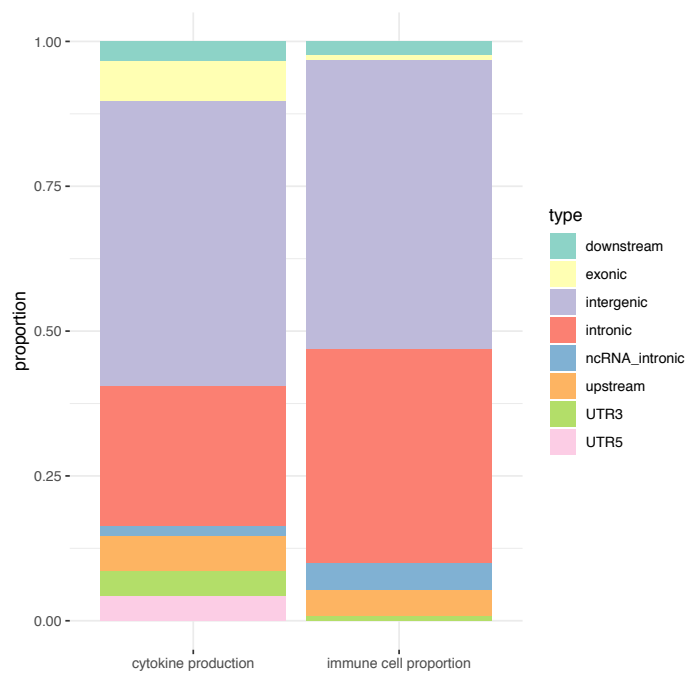

Supplement: supp [file elife-73709-supp-v1.zip › elife_poa_e73709_Figure_4_figure_supplement_2.pdf]

Figure 4—figure supplement 3.

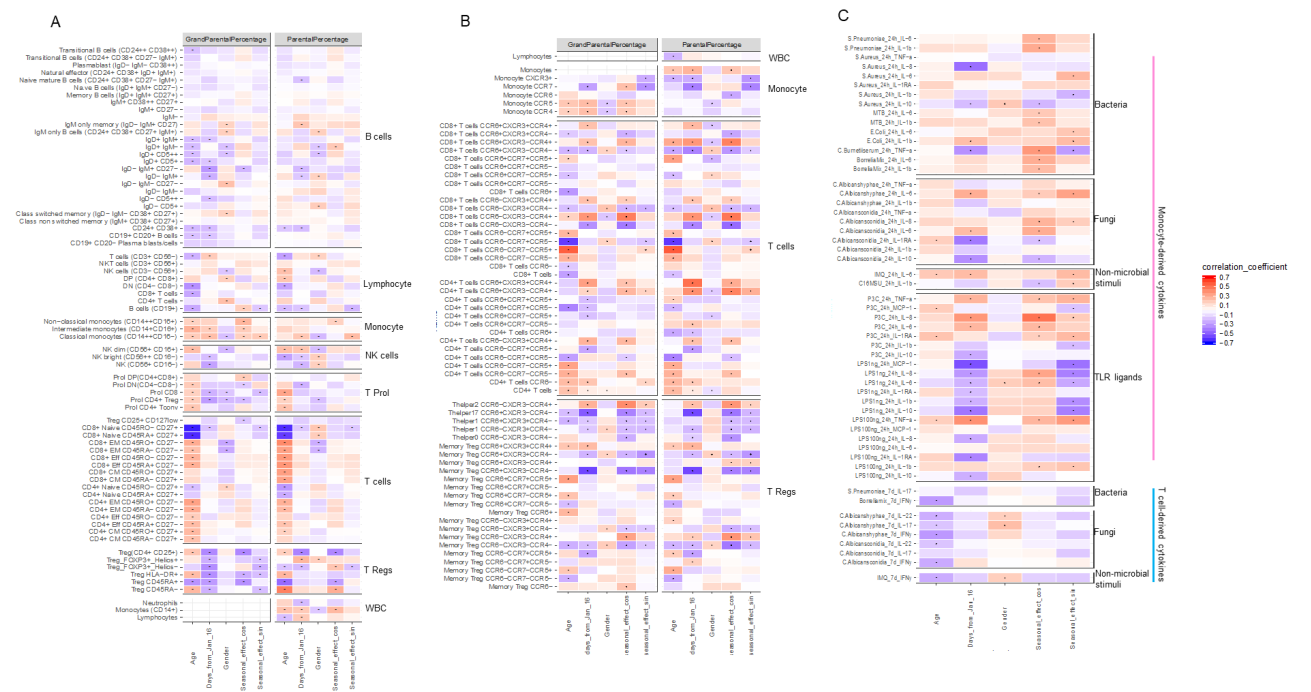

Supplement: supp [file elife-73709-supp-v1.zip › elife_poa_e73709_Figure_4_figure_supplement_3.pdf]
